# Supplementary material
Source: ML conference proceedings conference paper supplement (https://proceedings.mlr.press/v151/van-der-zander22a.html)

# 1 Introduction

This document shows the canonical missing cycle path graphs up to length 7, calculated using Gröbner bases.

The bidirected edges are drawn inverted: Any pair of nodes is connected by a bidirected edge if we do *not* draw a dashed line between them.

The directed edges form a path  $0 \rightarrow 1 \rightarrow 2 \rightarrow 3 \rightarrow \dots$  in each graph.

The color of the directed edges encodes the identifiability:

1. green: The edge is uniquely identifiable.
2. yellow: The edge is 2-identifiable.
3. blue: The Gröbner base does not include a solution the edge identifiability directly, but the edge can be identified using propagate from adjacent edges. It is either 1-identifiable or 2-identifiable depending on the color of the adjacent edge.
4. black: The edge is not identifiable

## 2 879 graphs

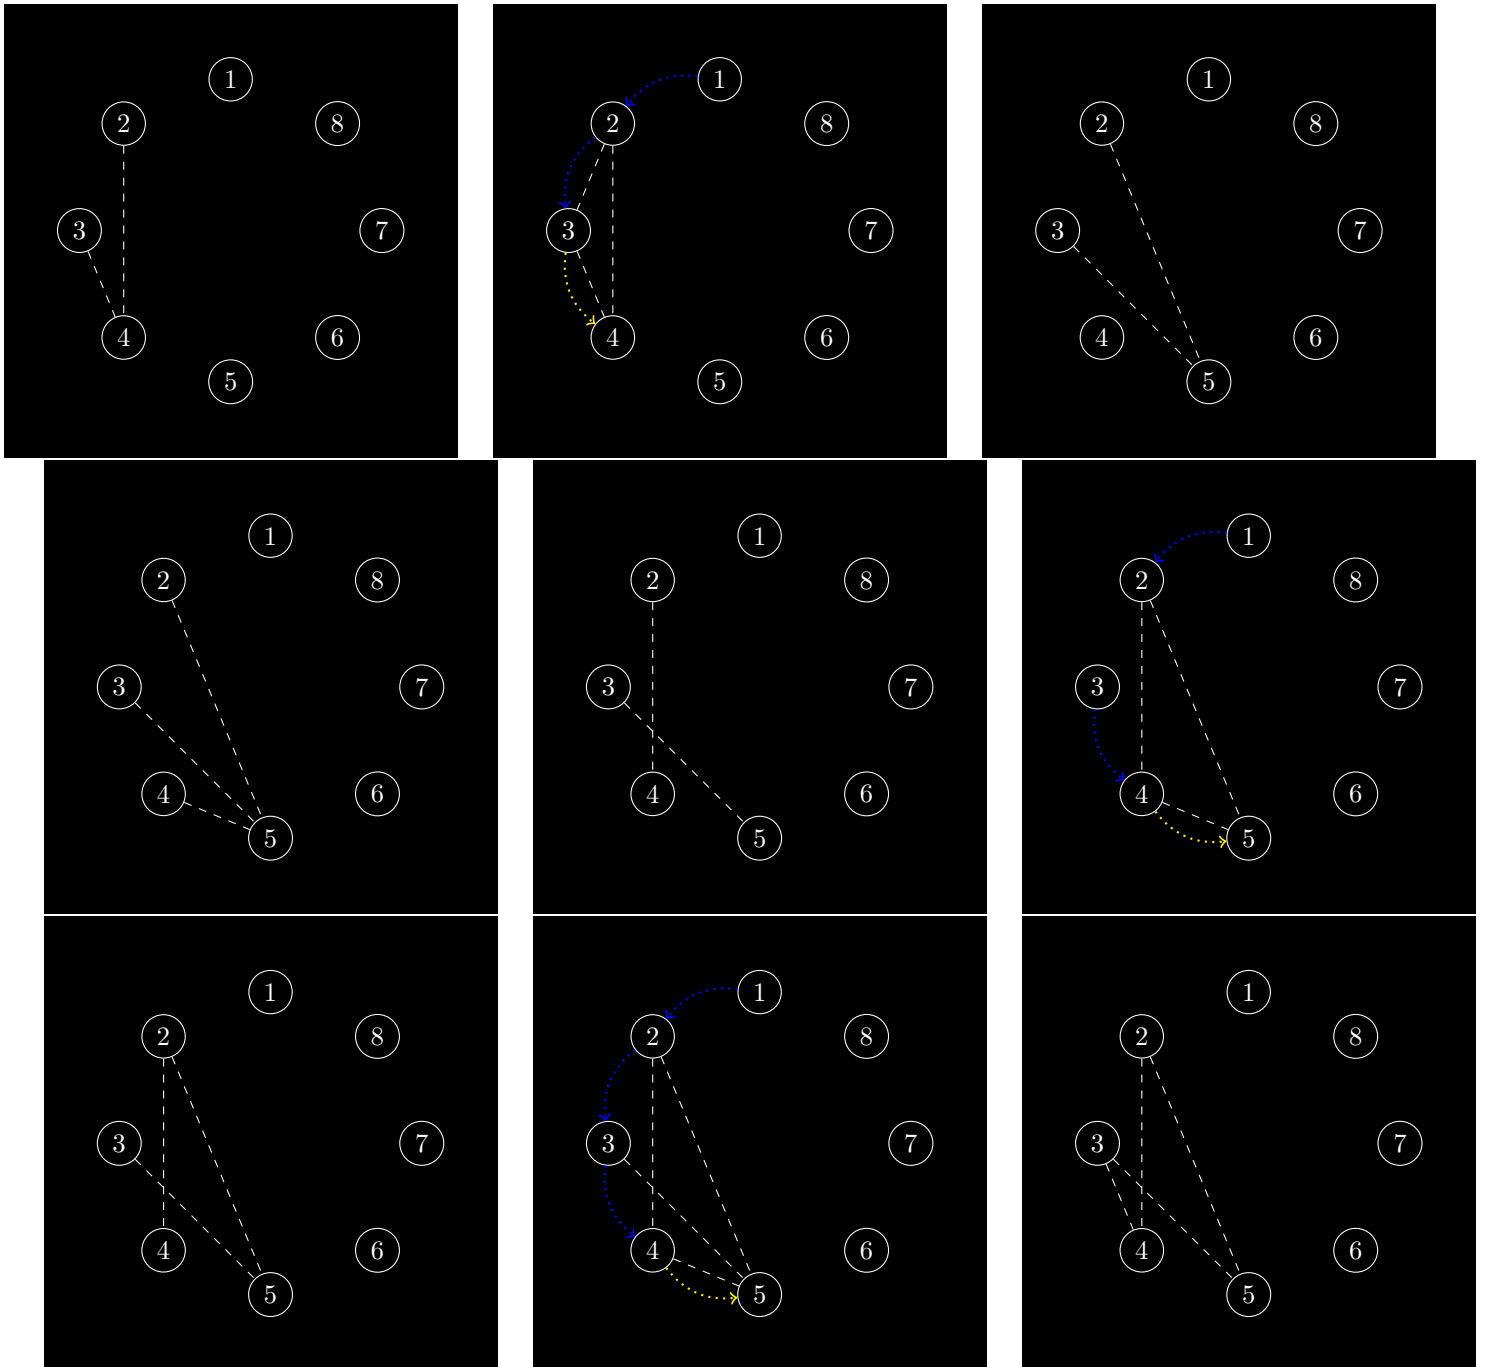

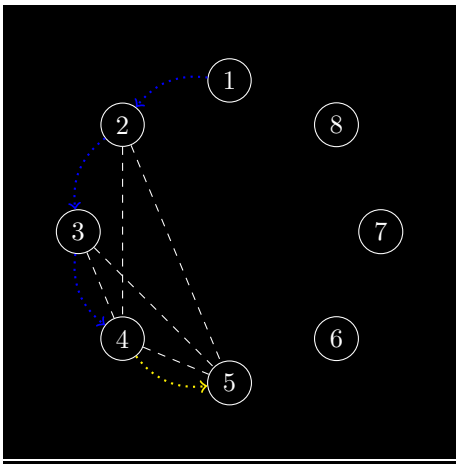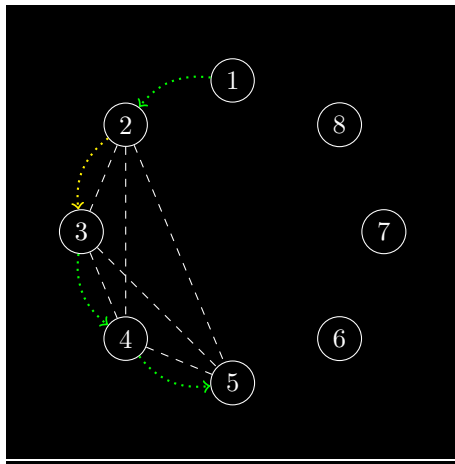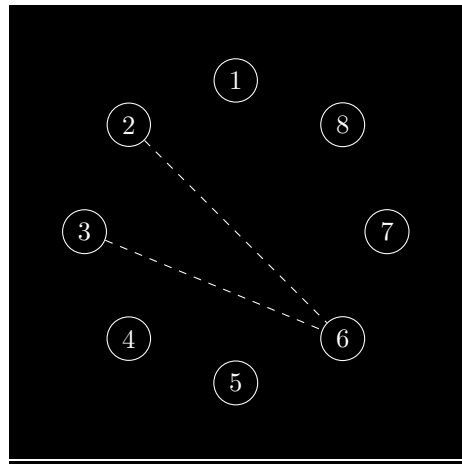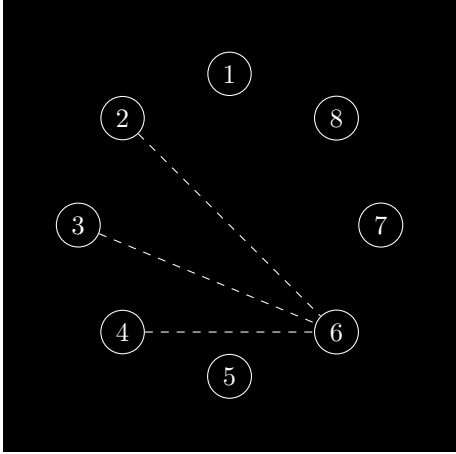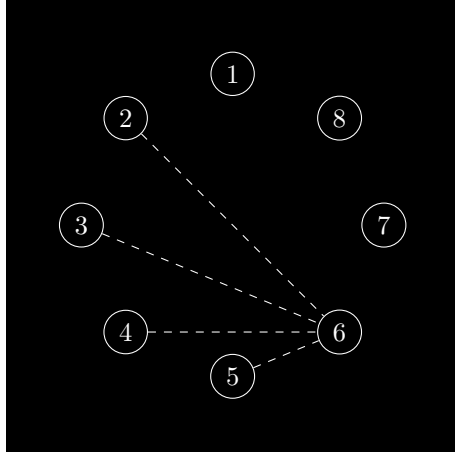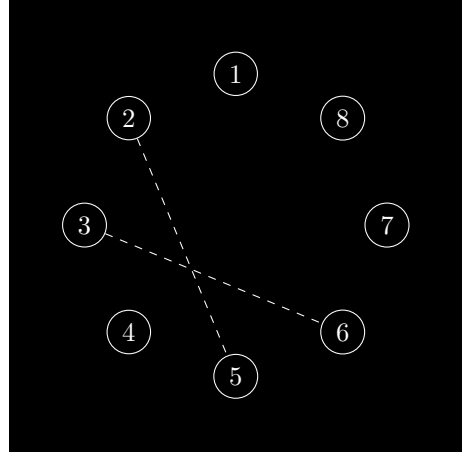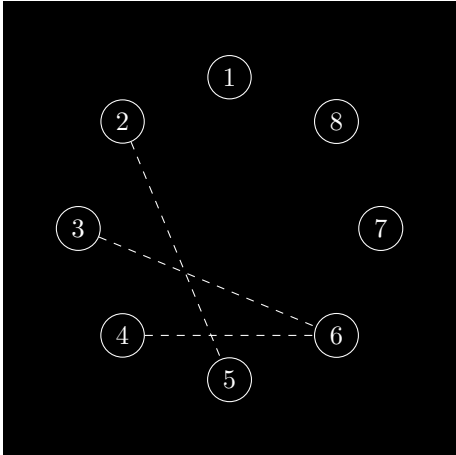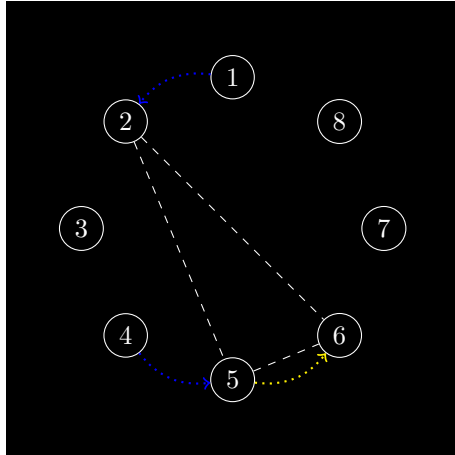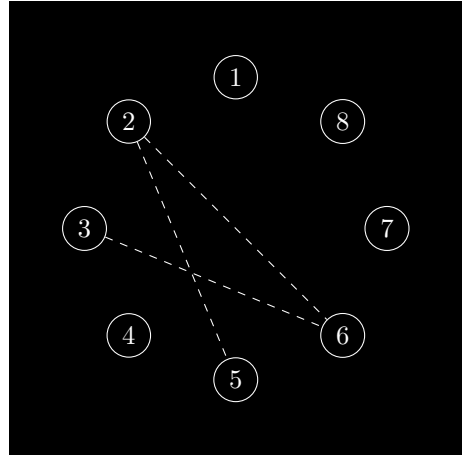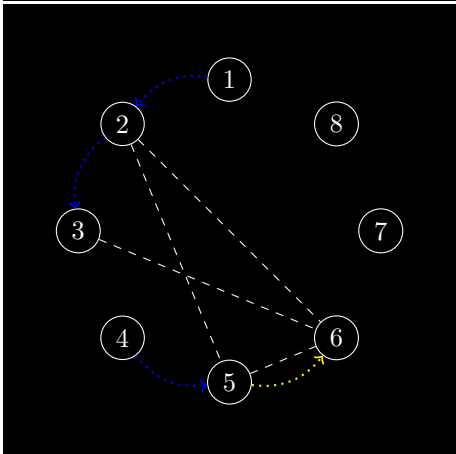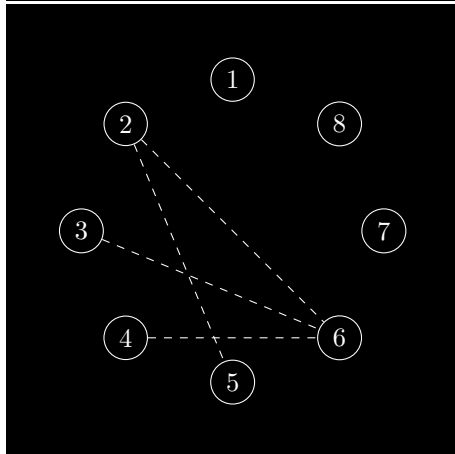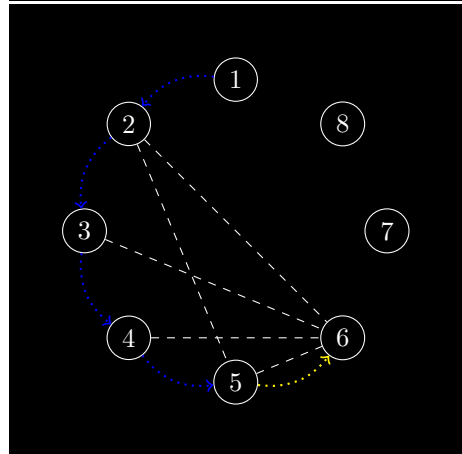

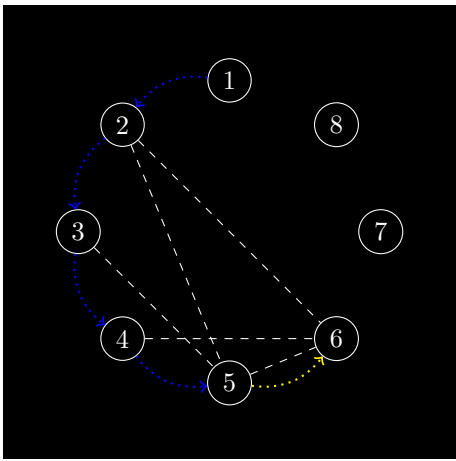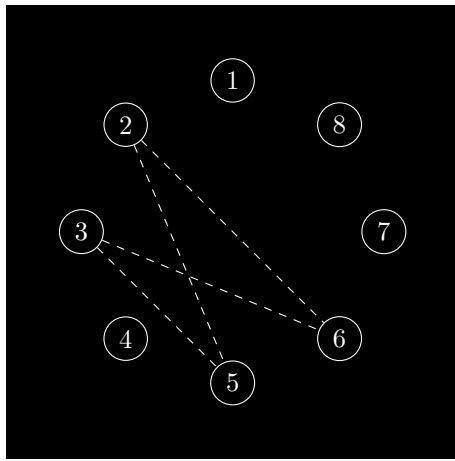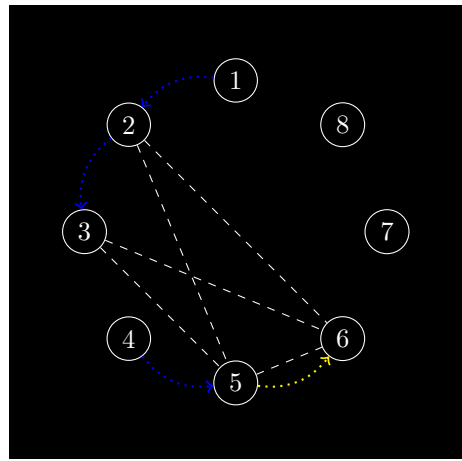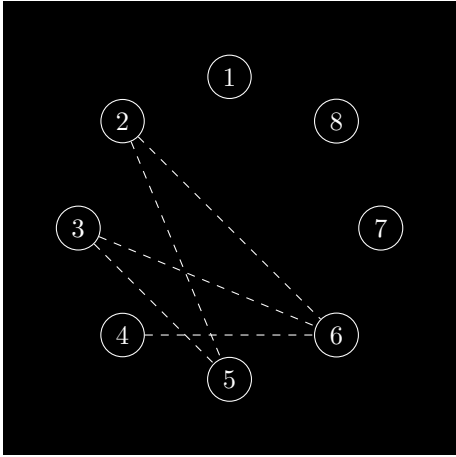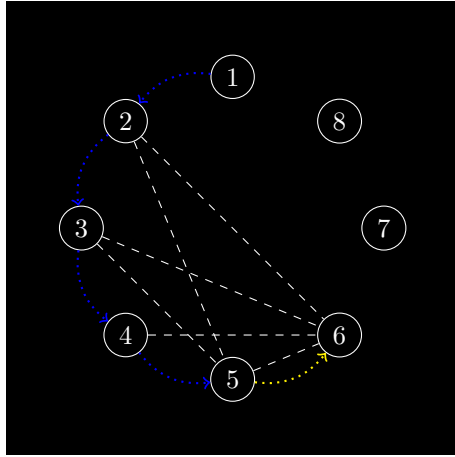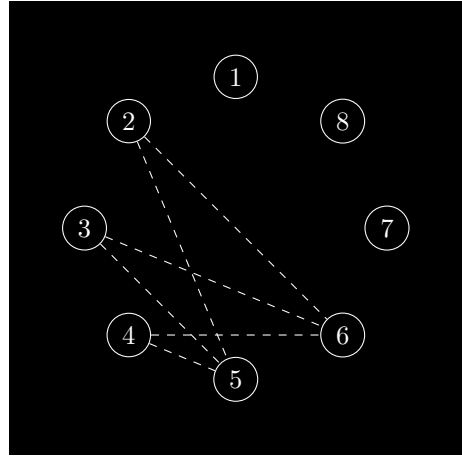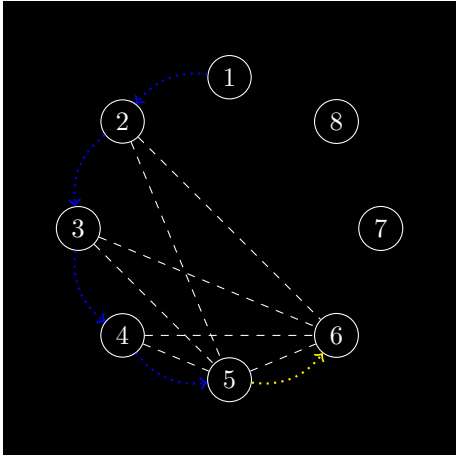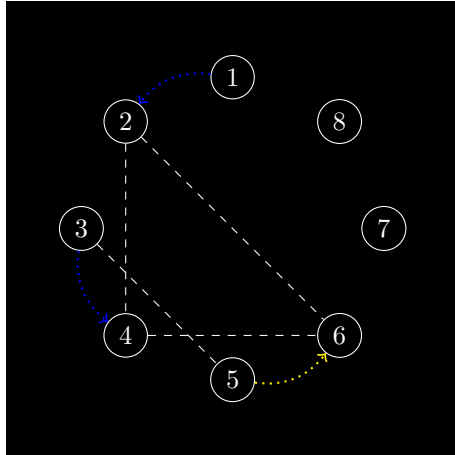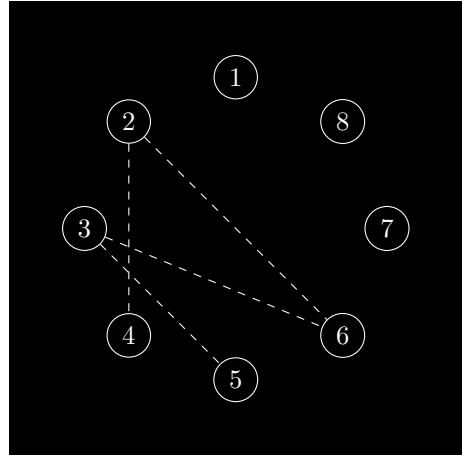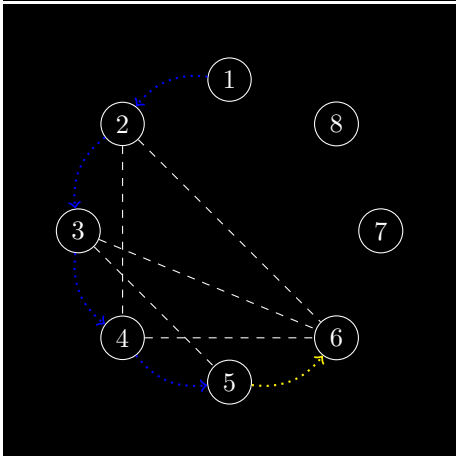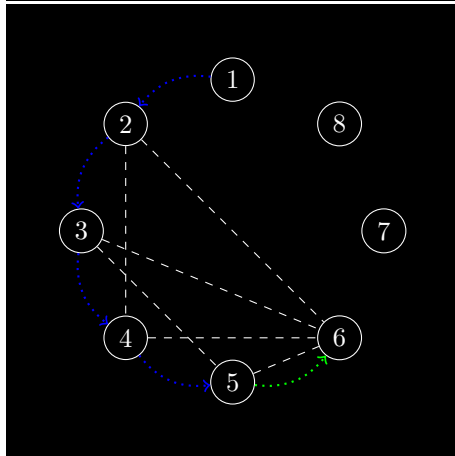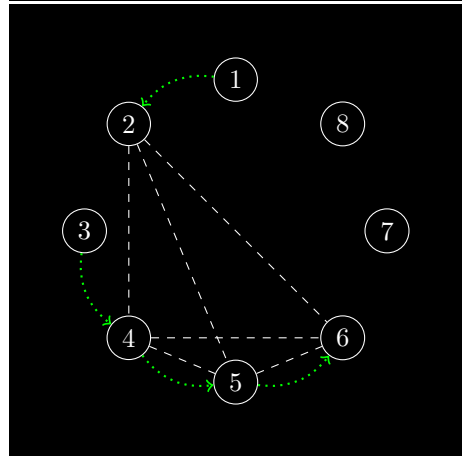

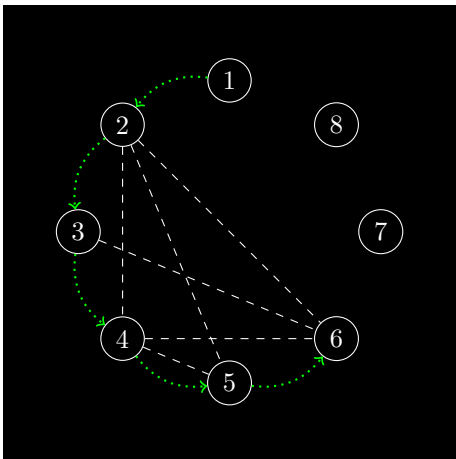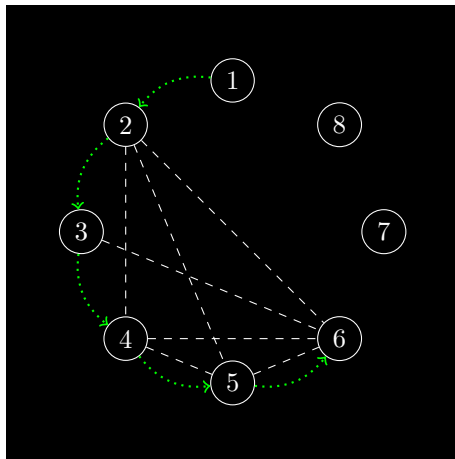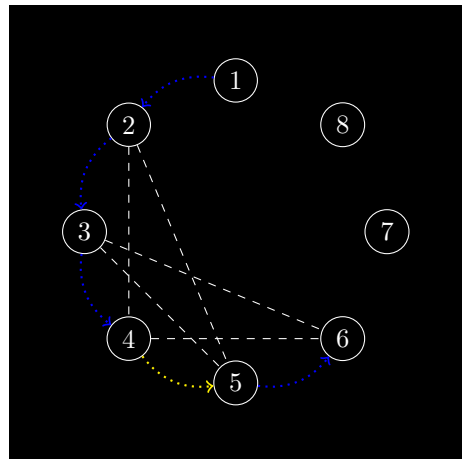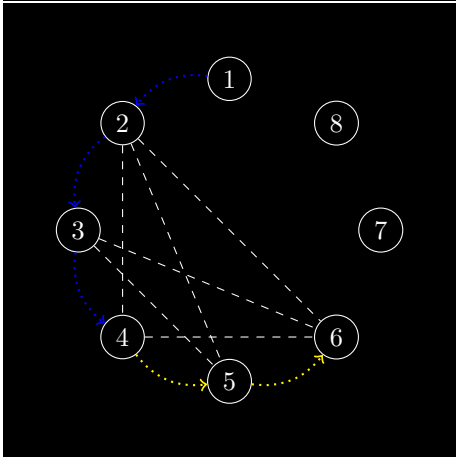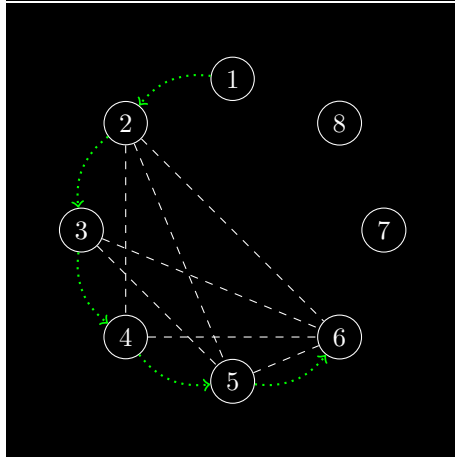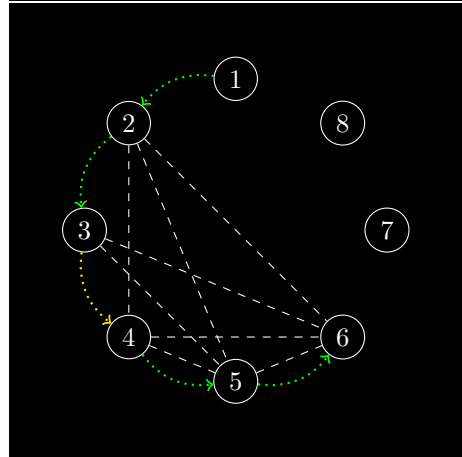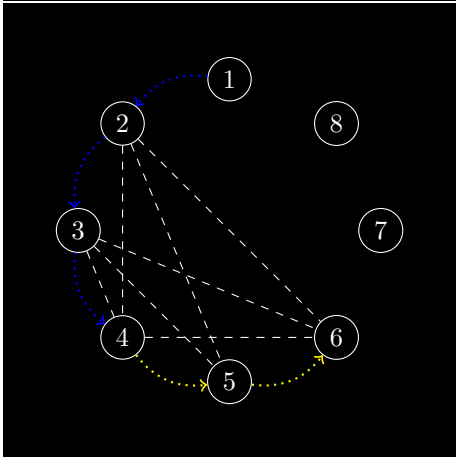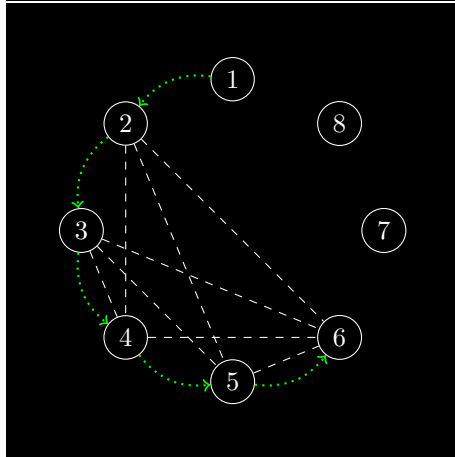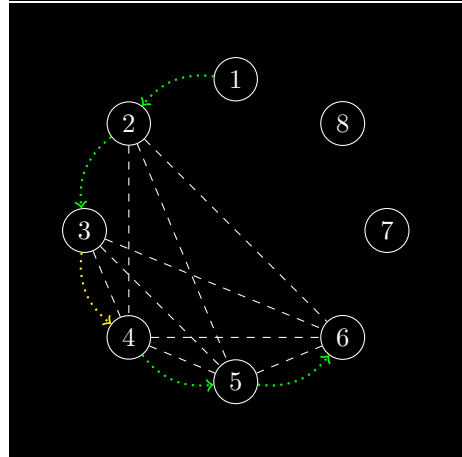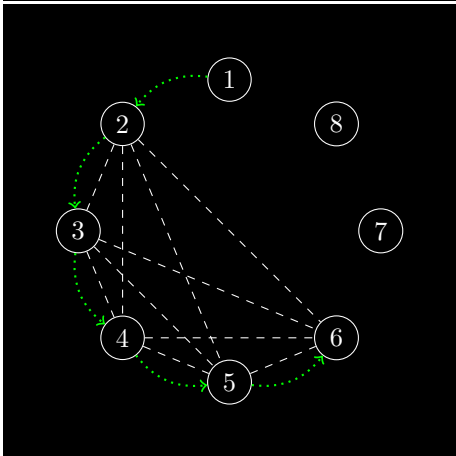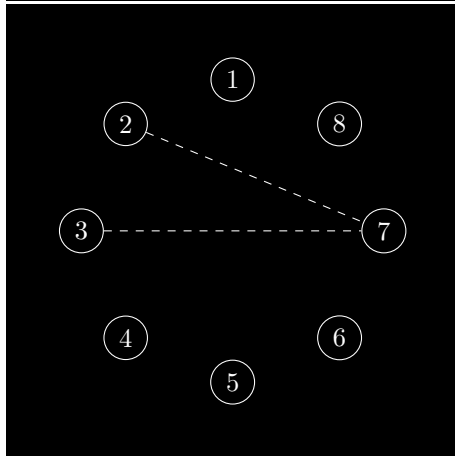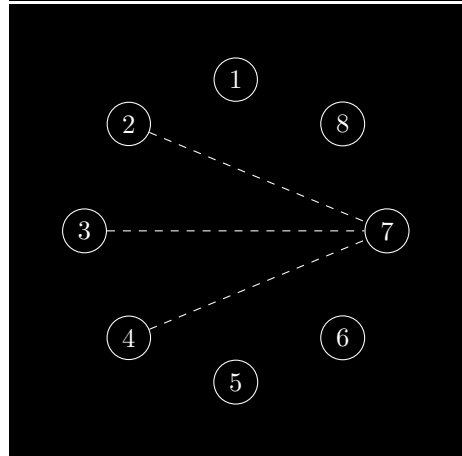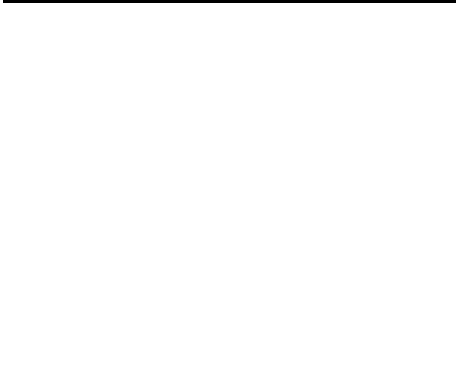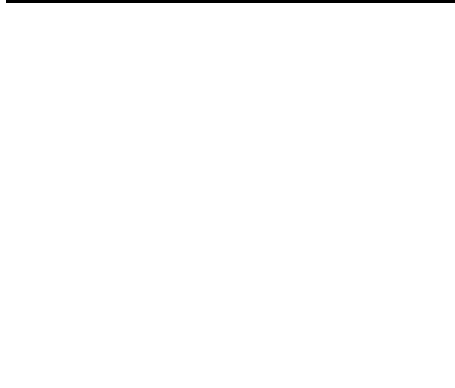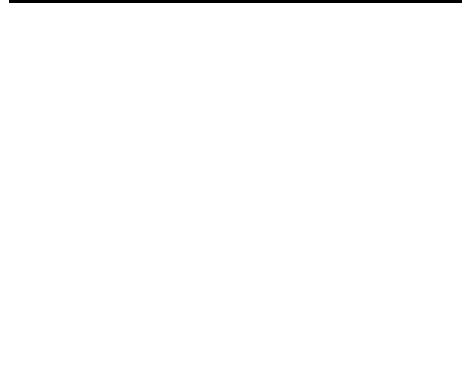

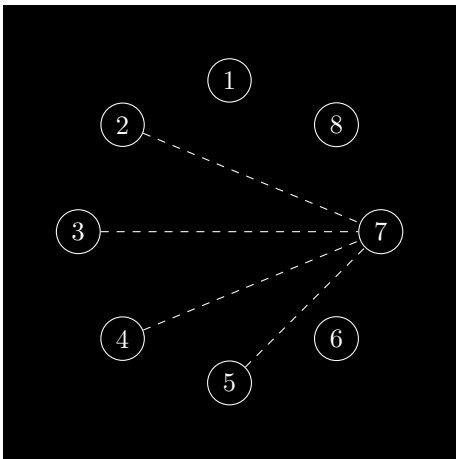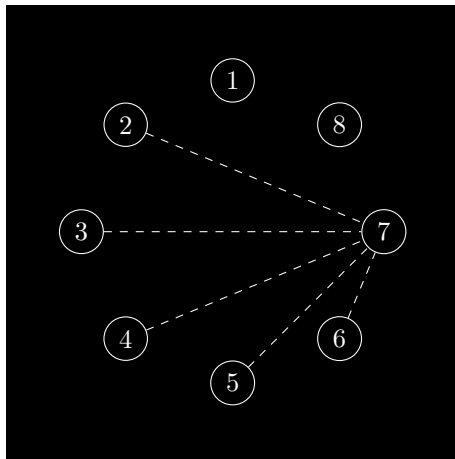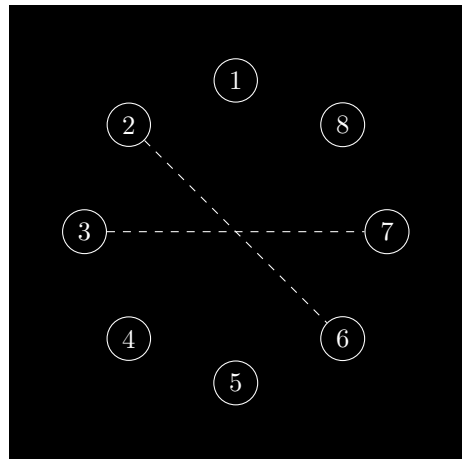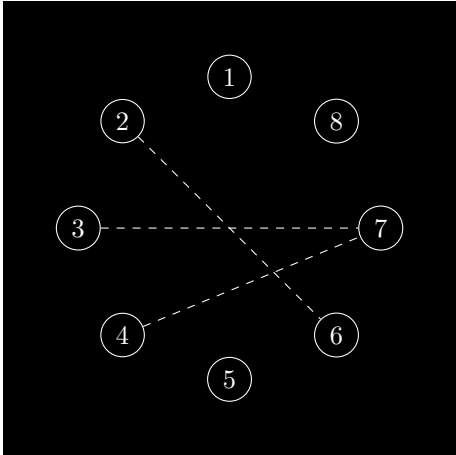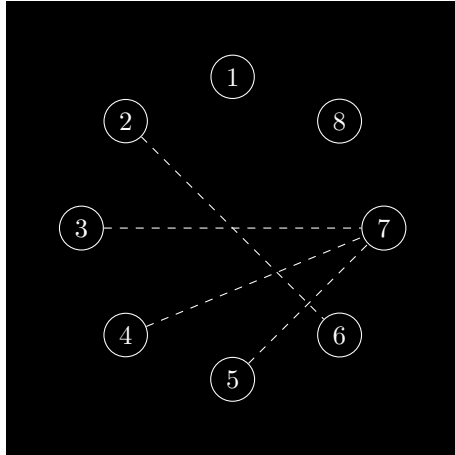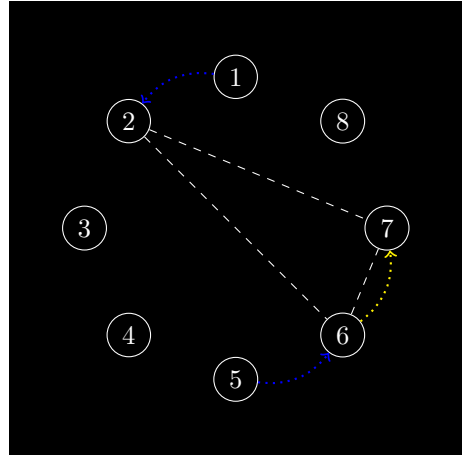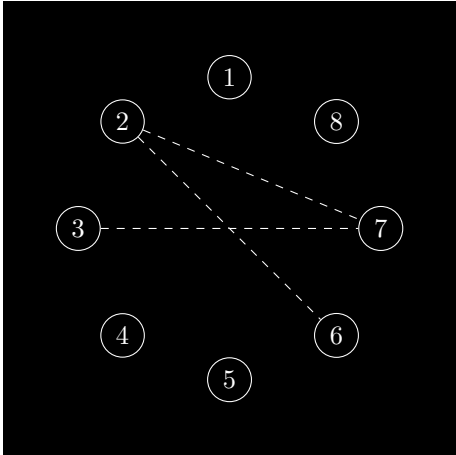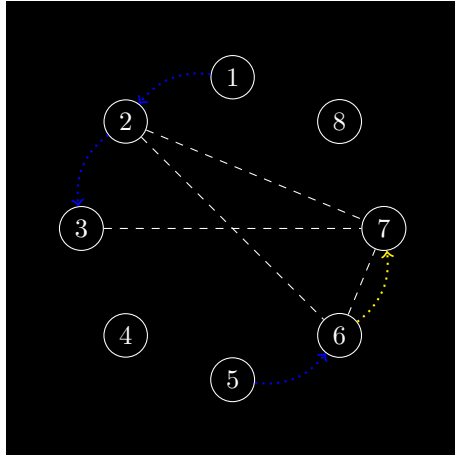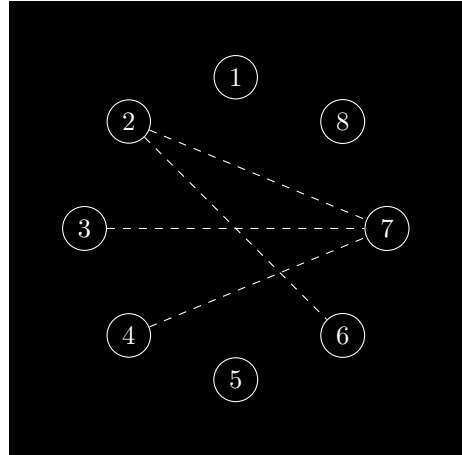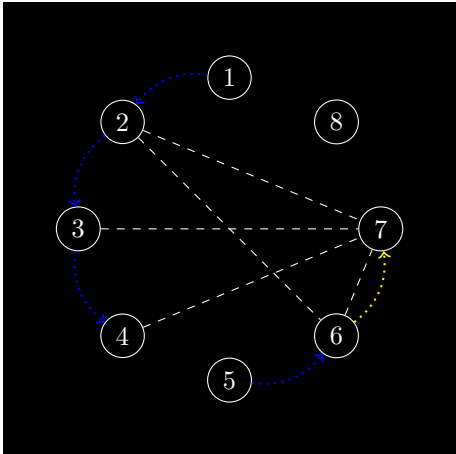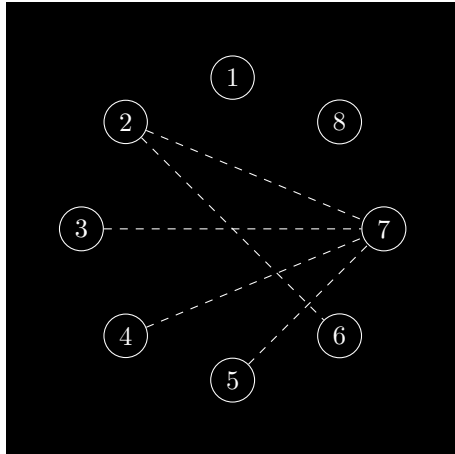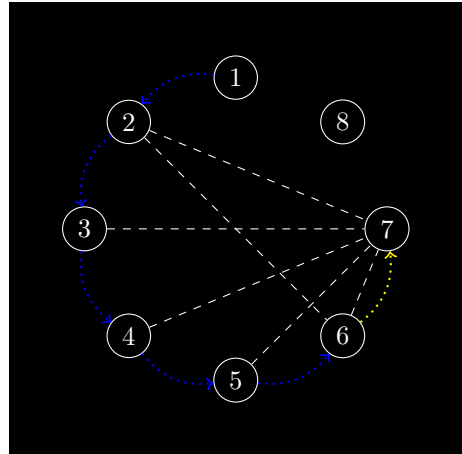

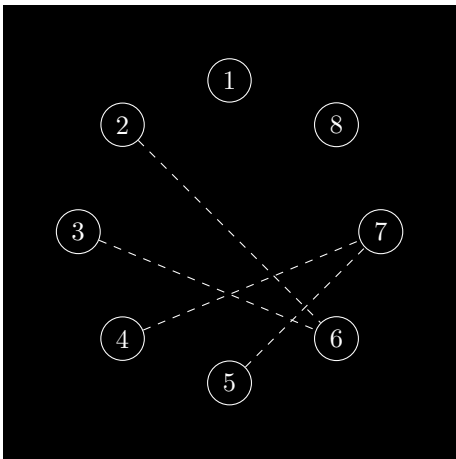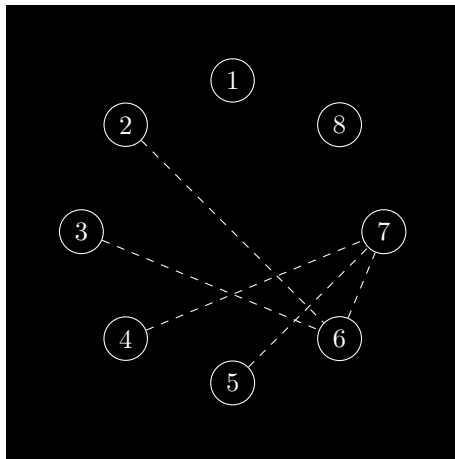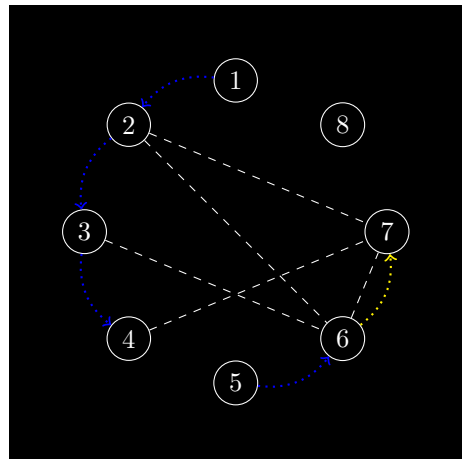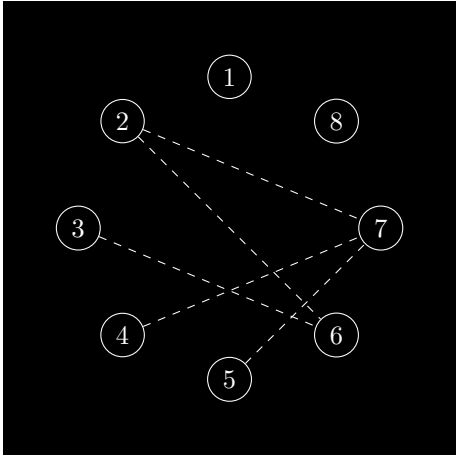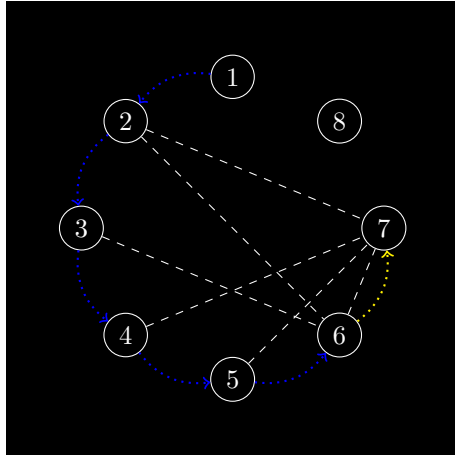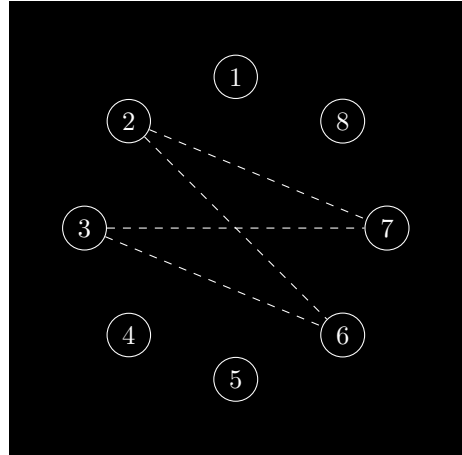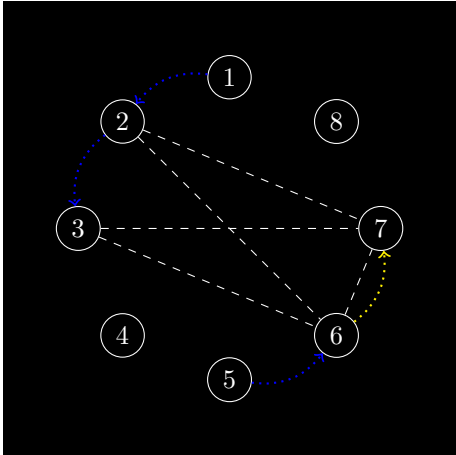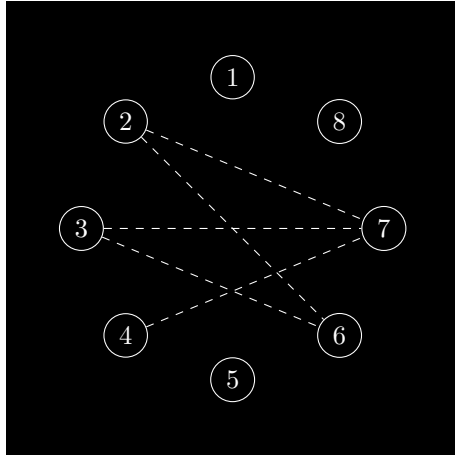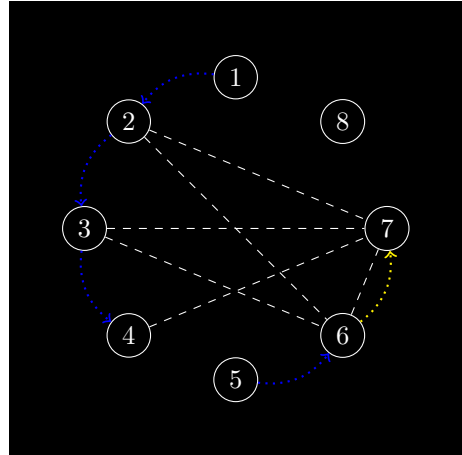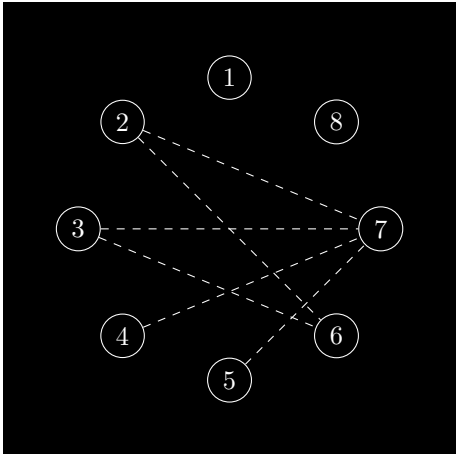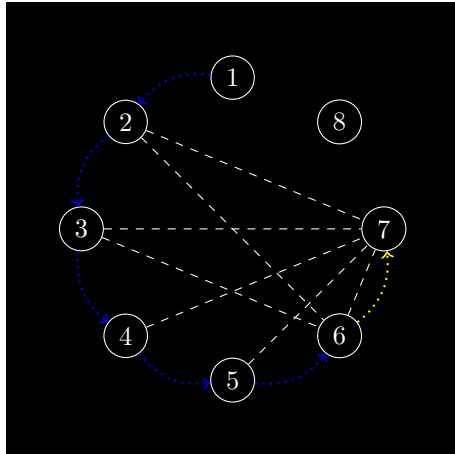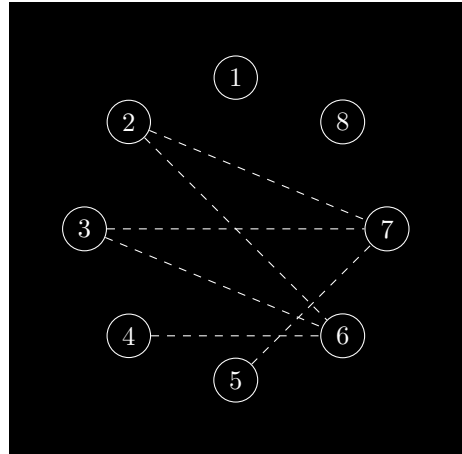

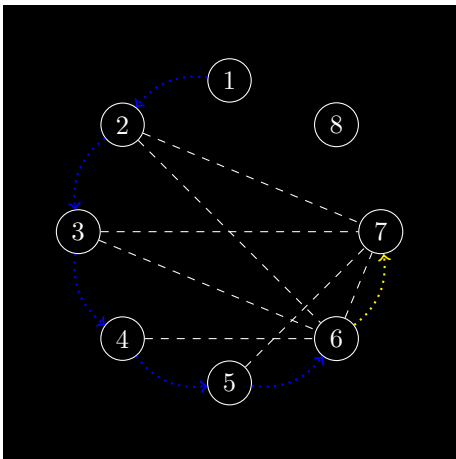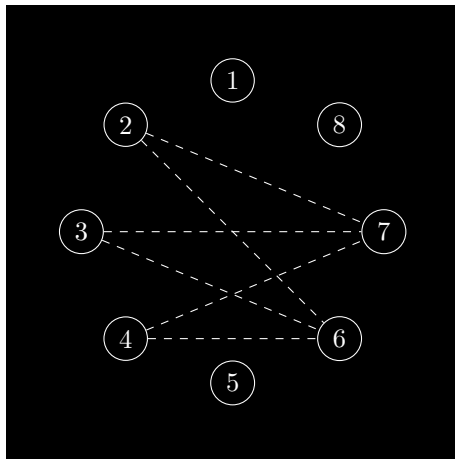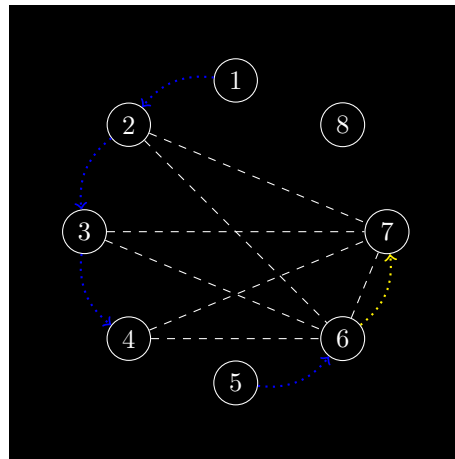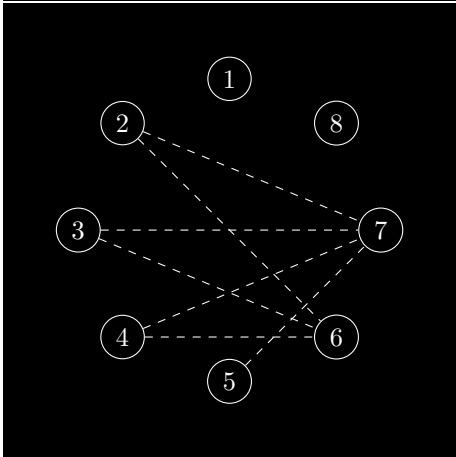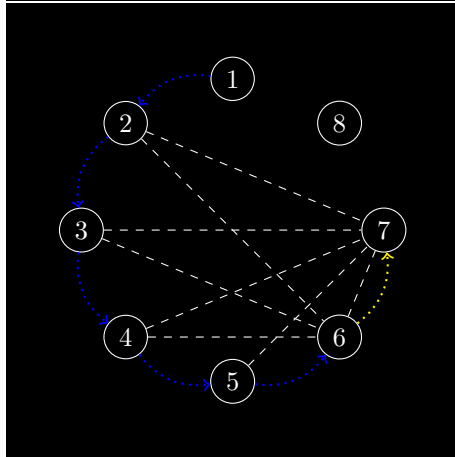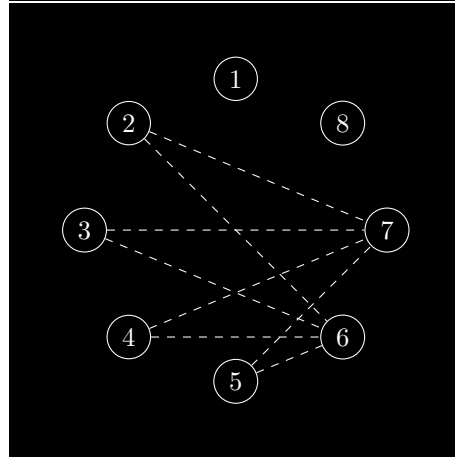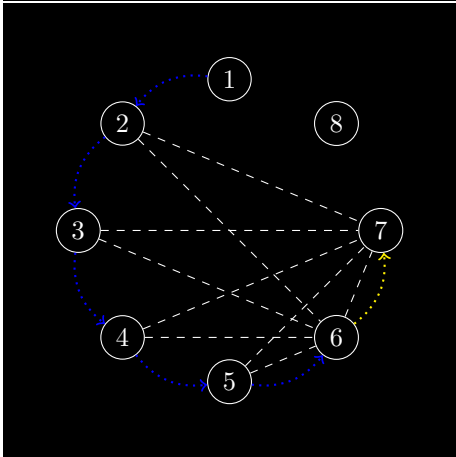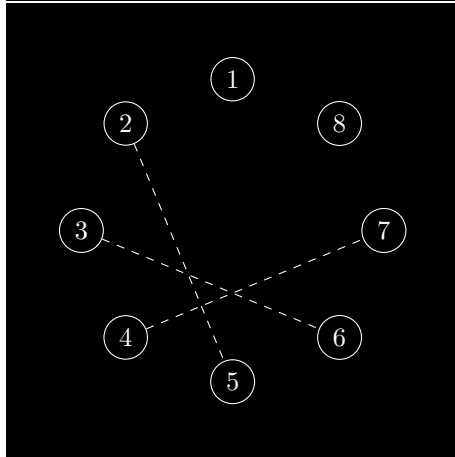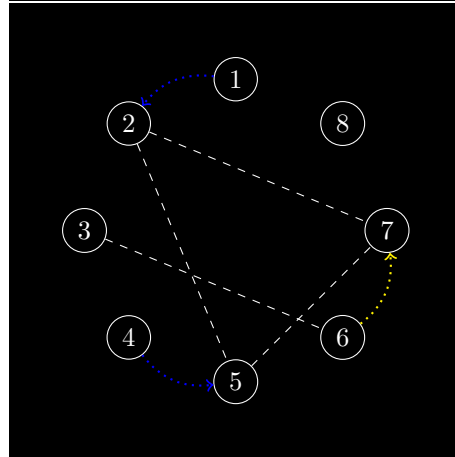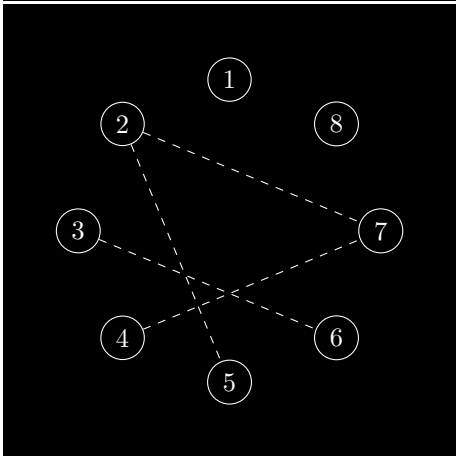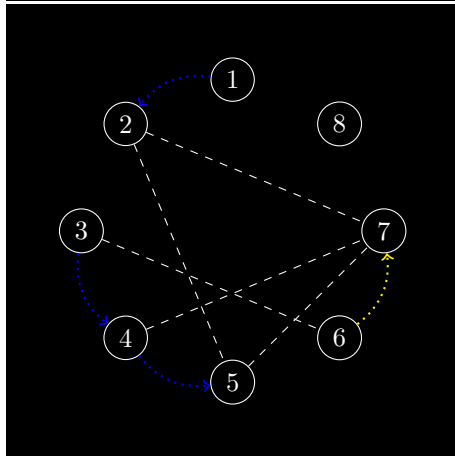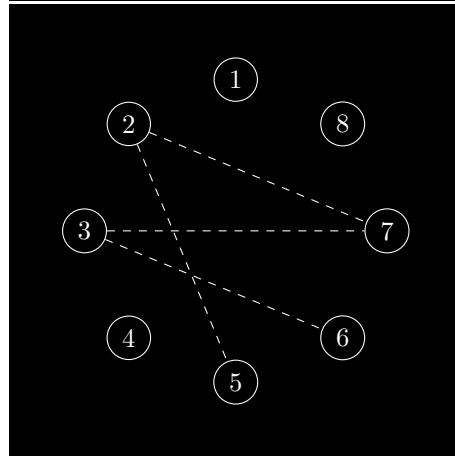

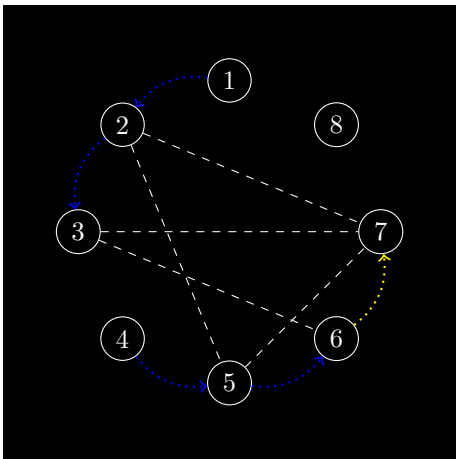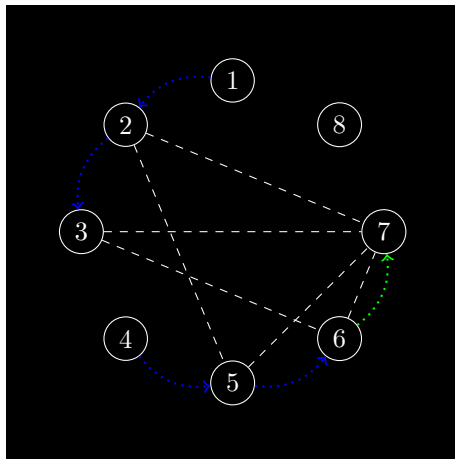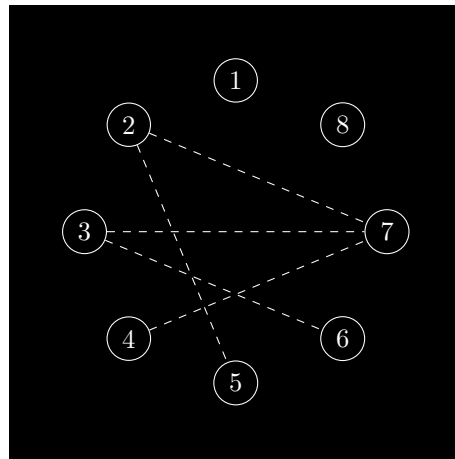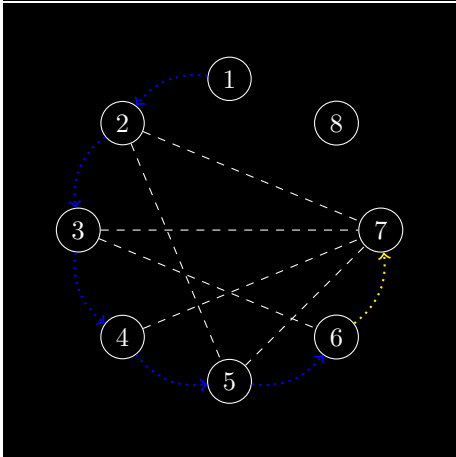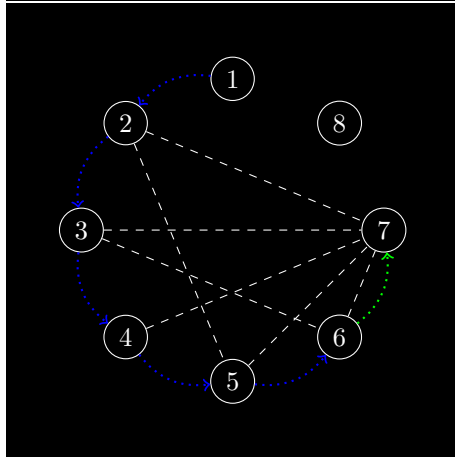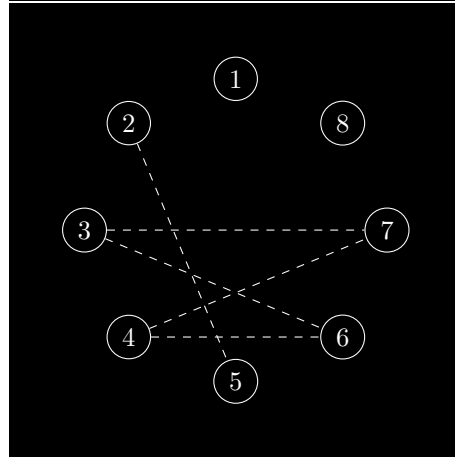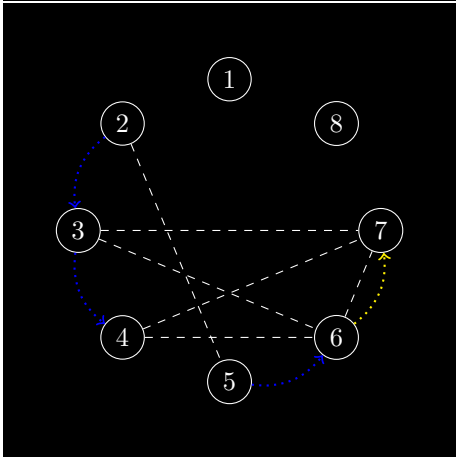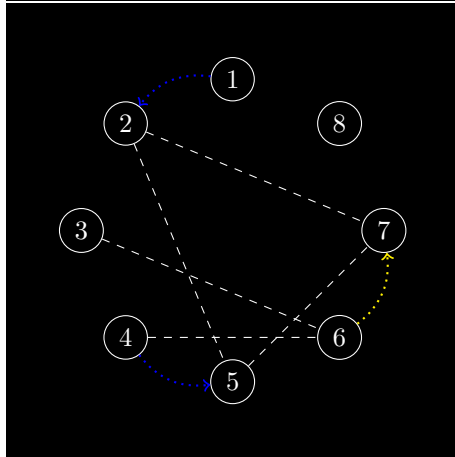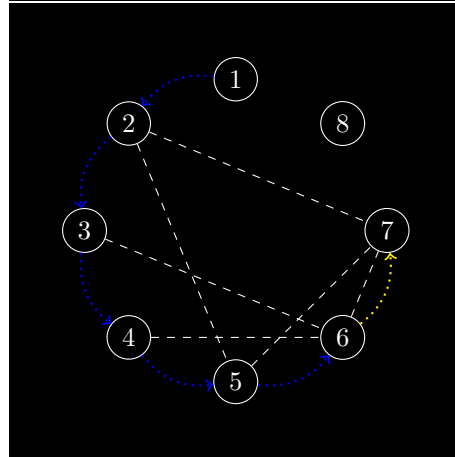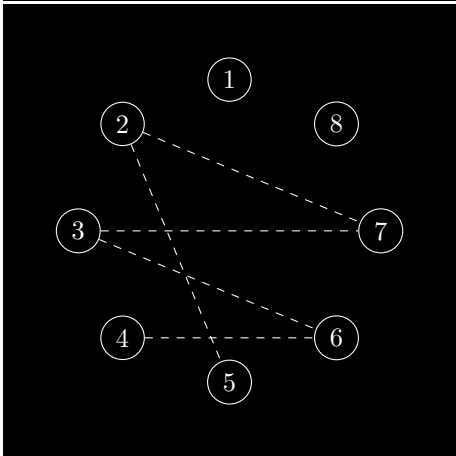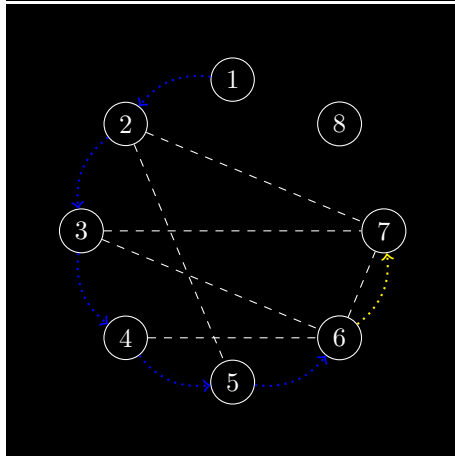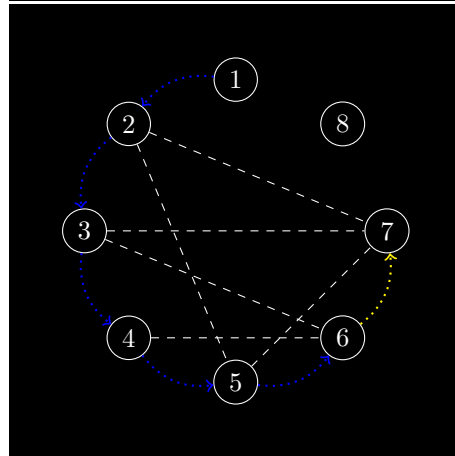



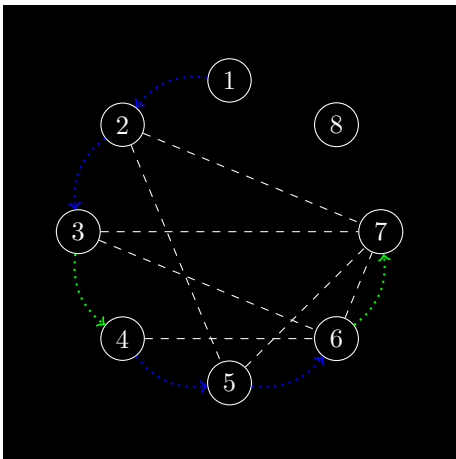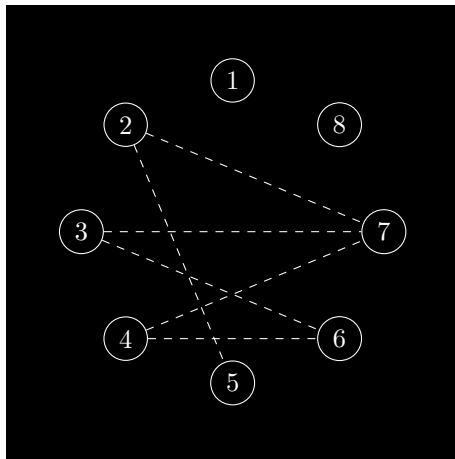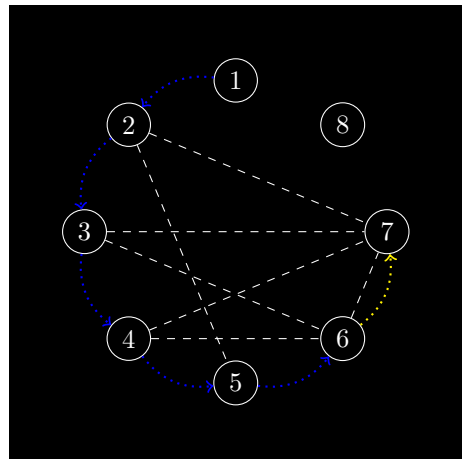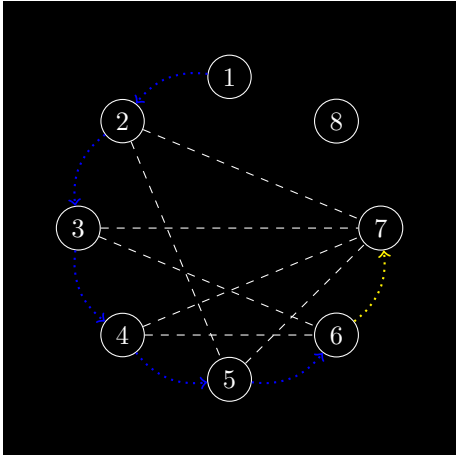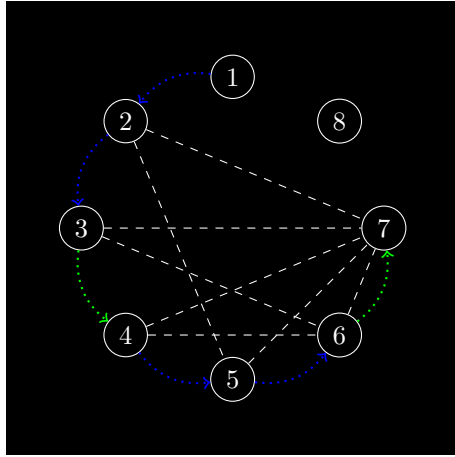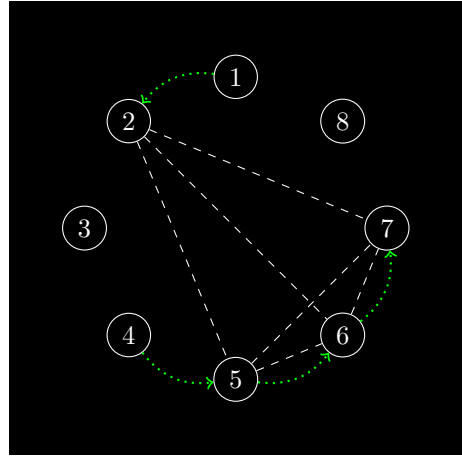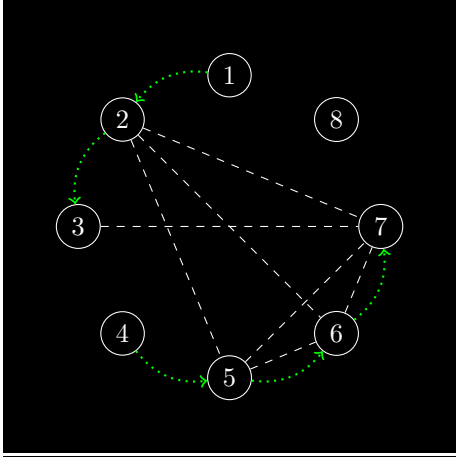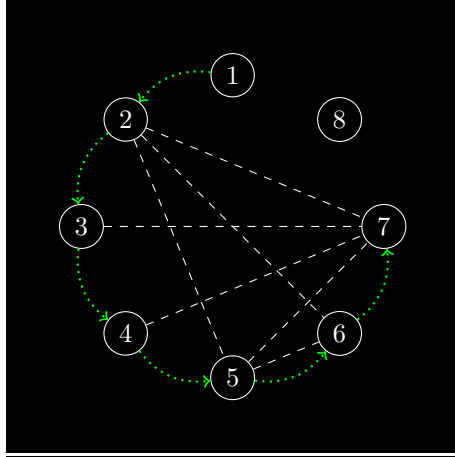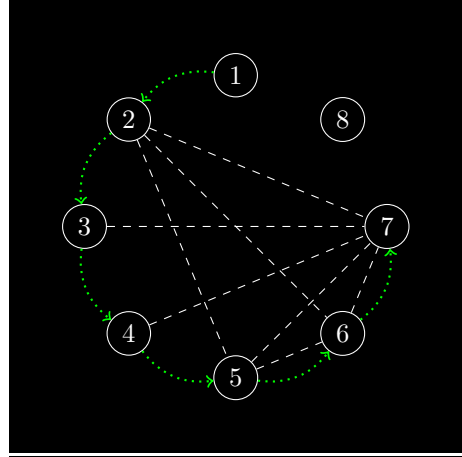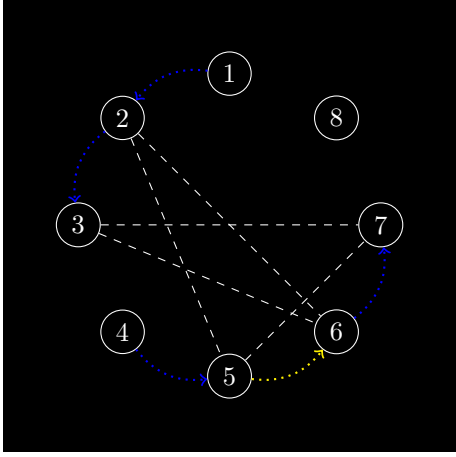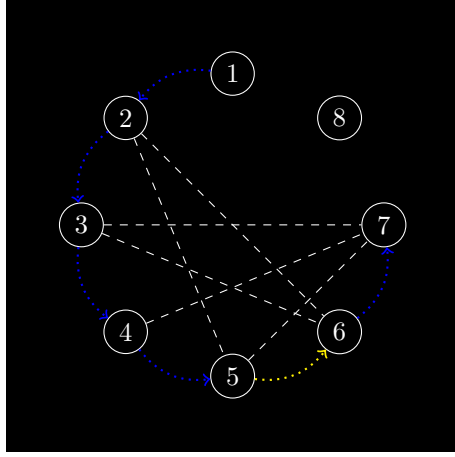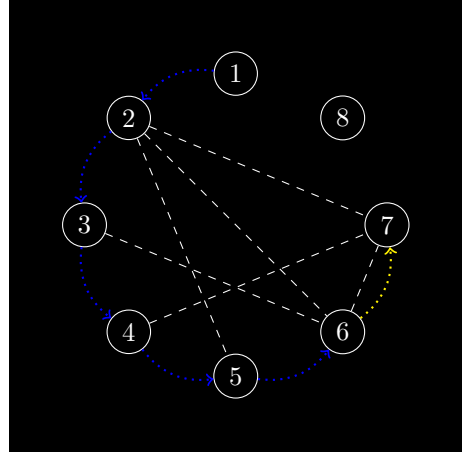

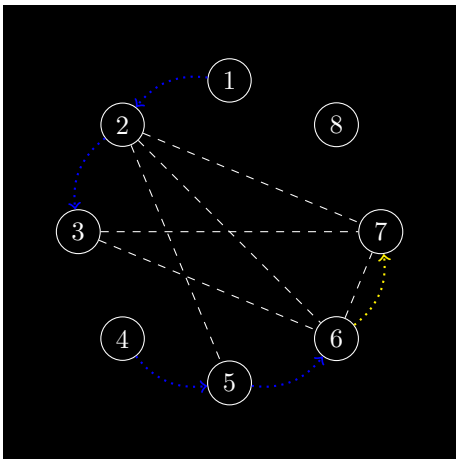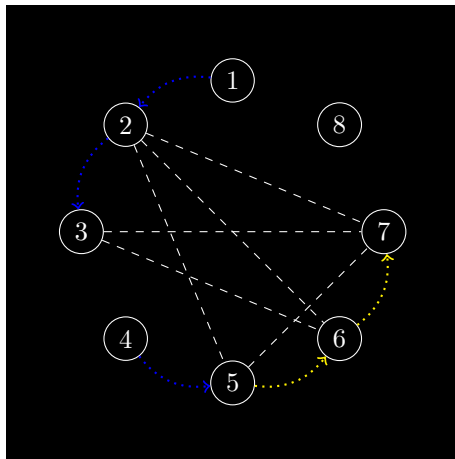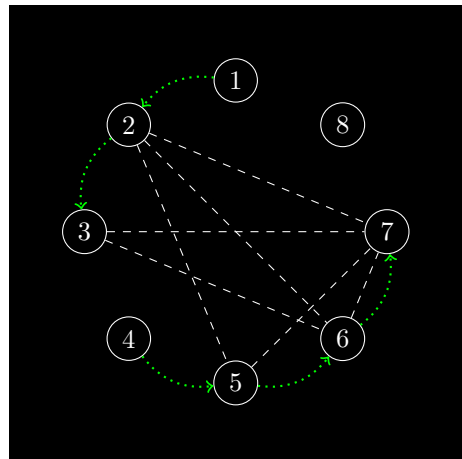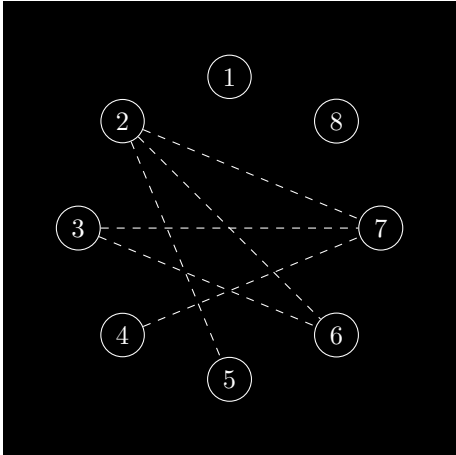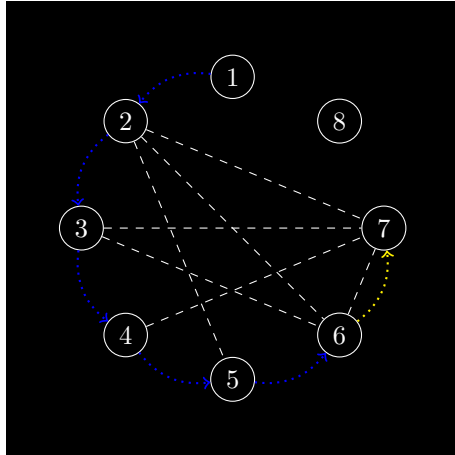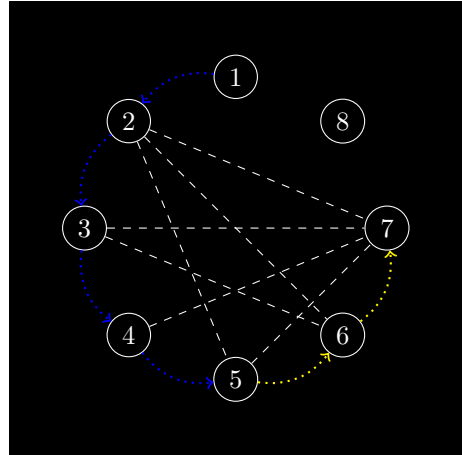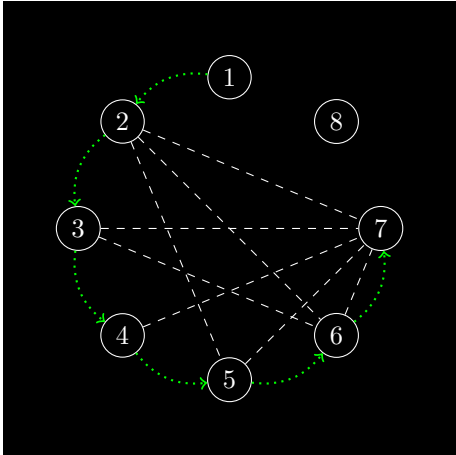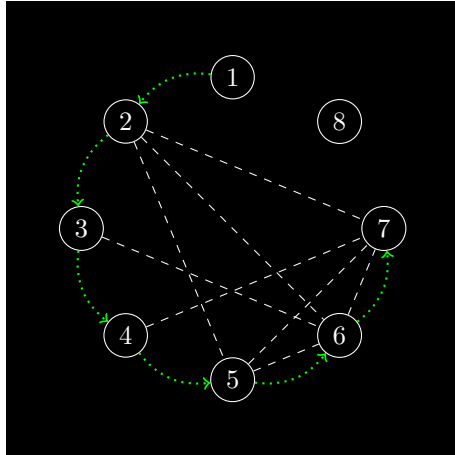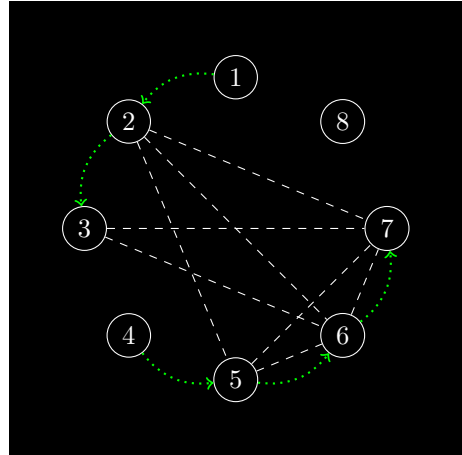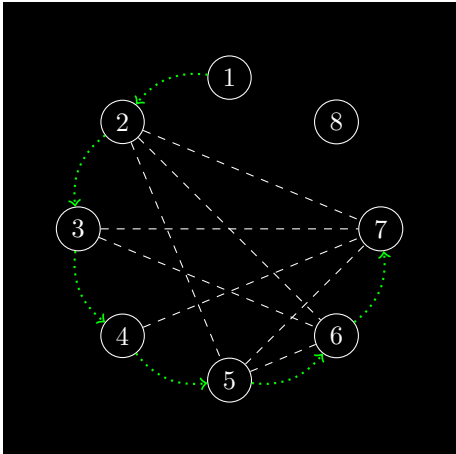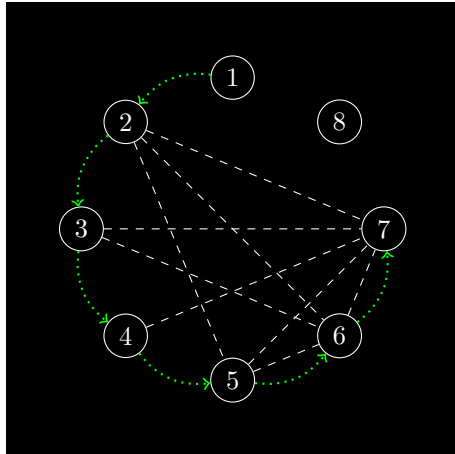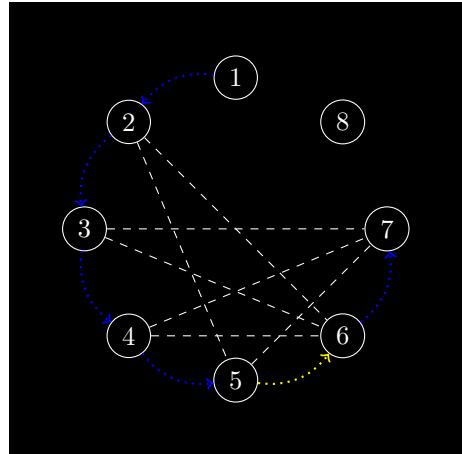

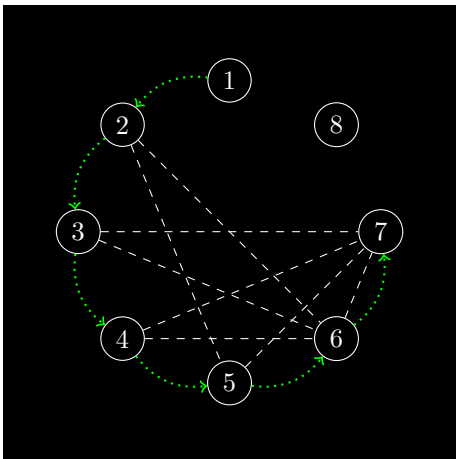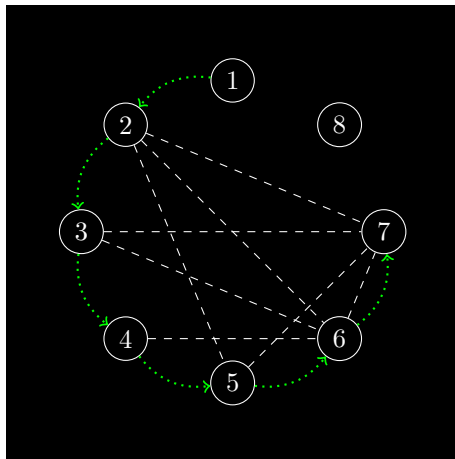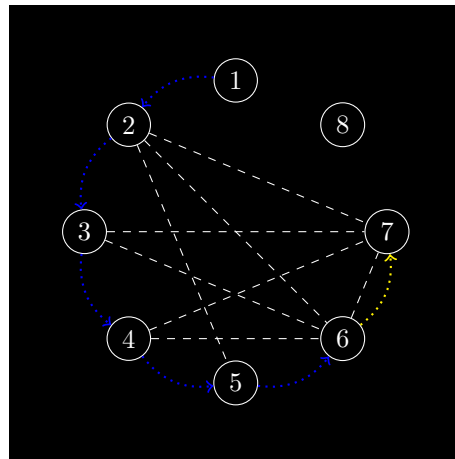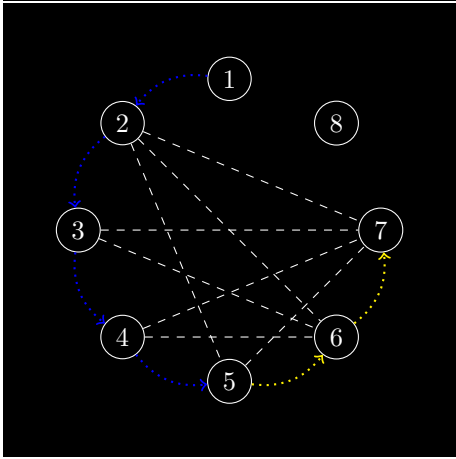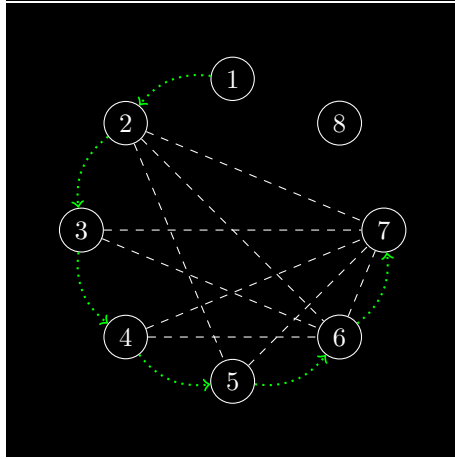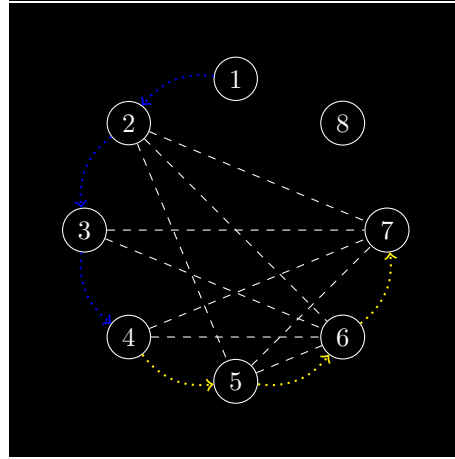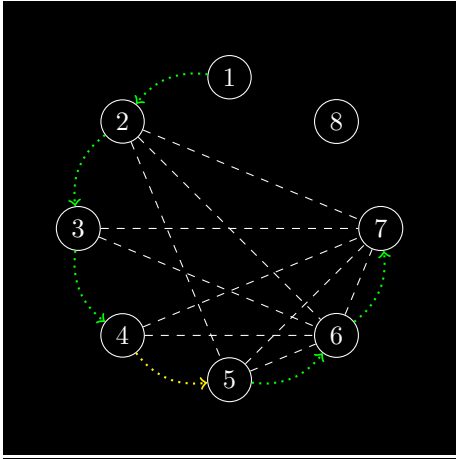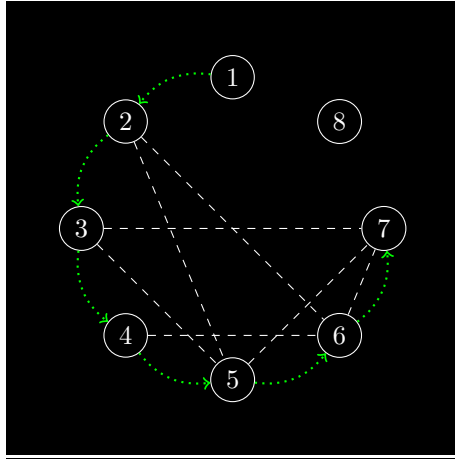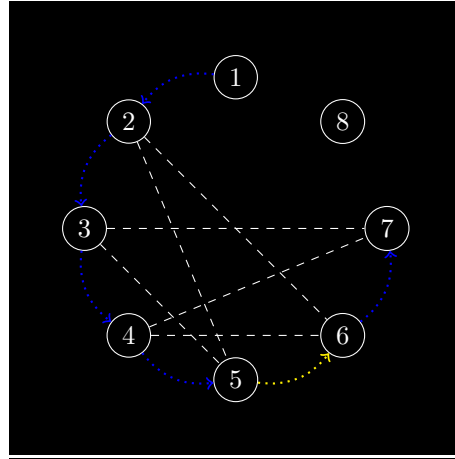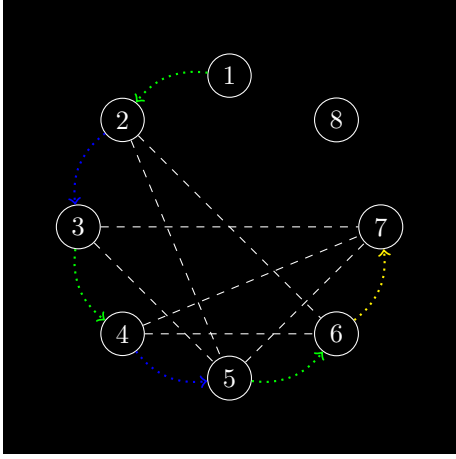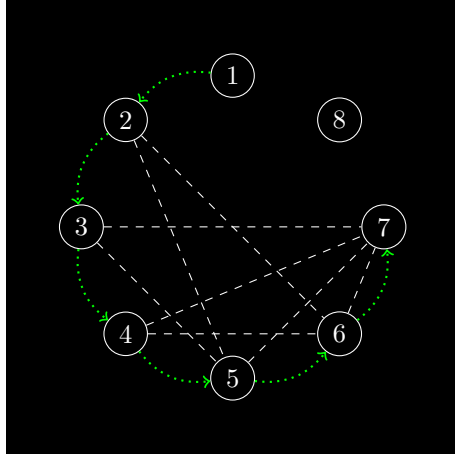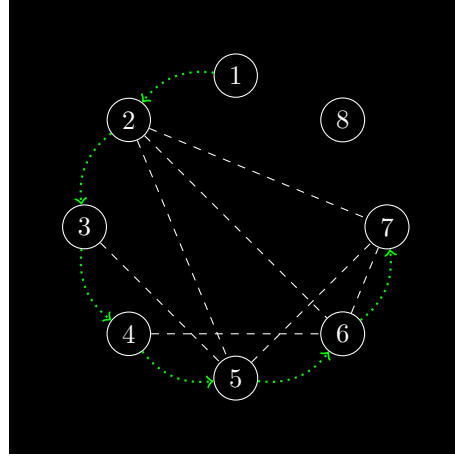

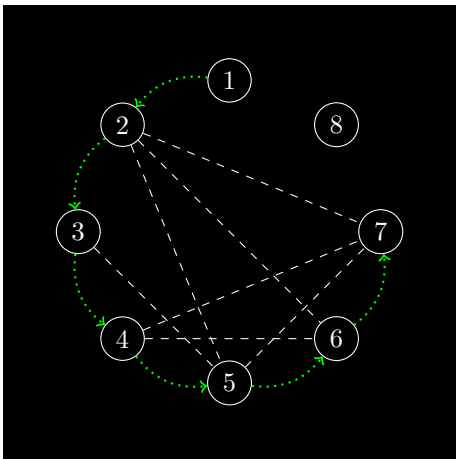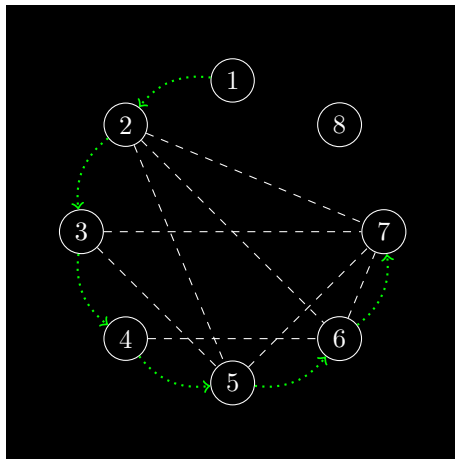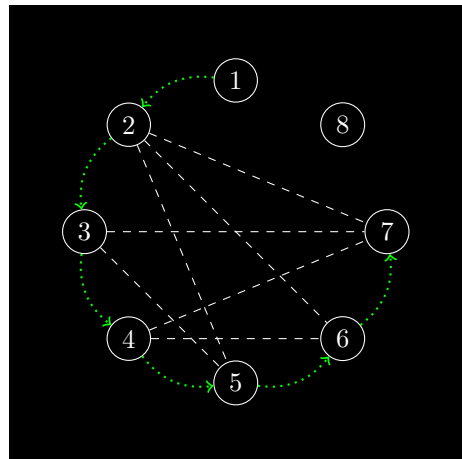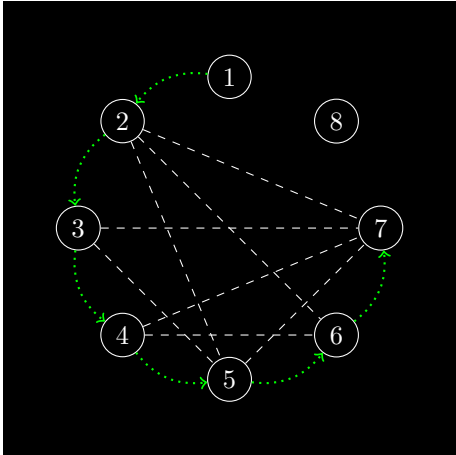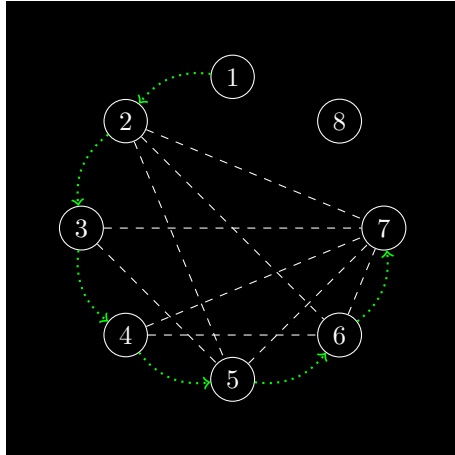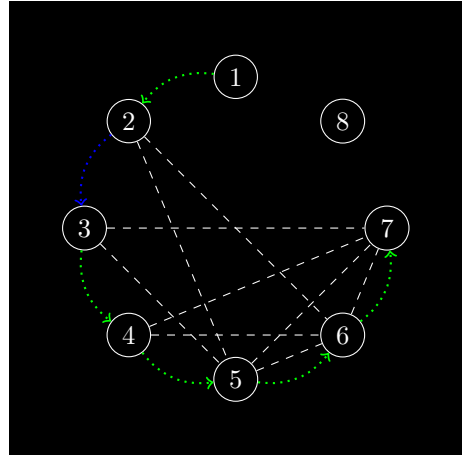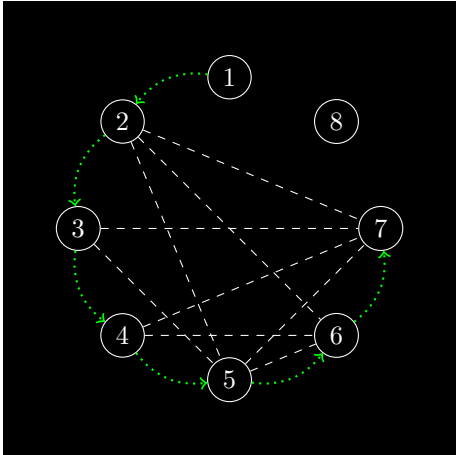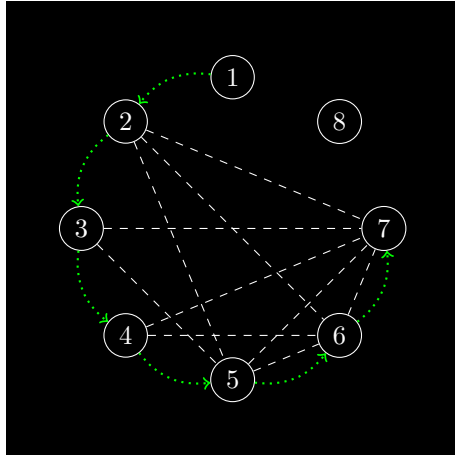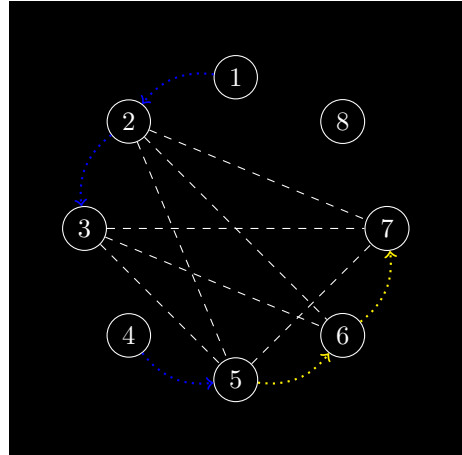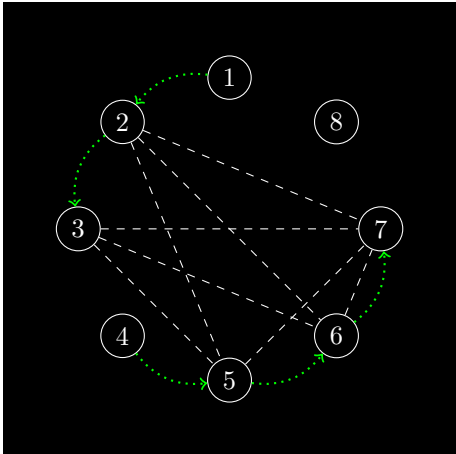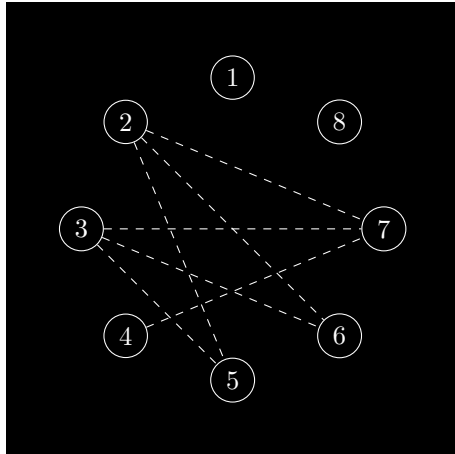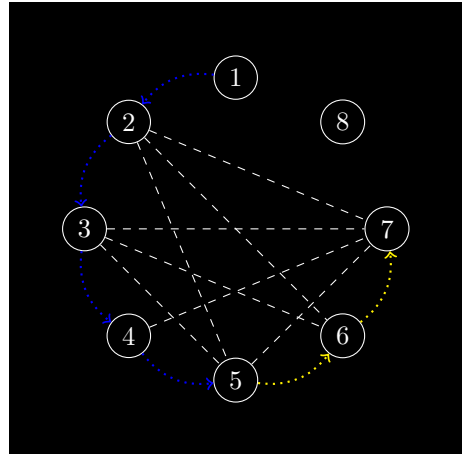

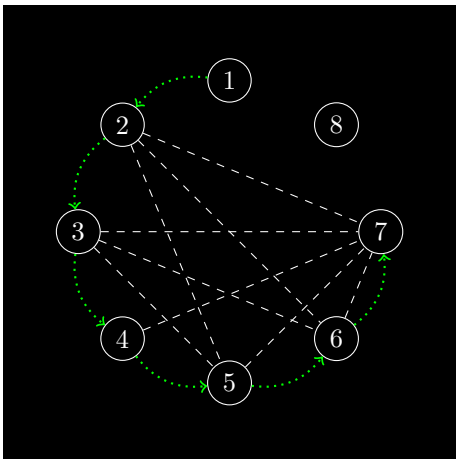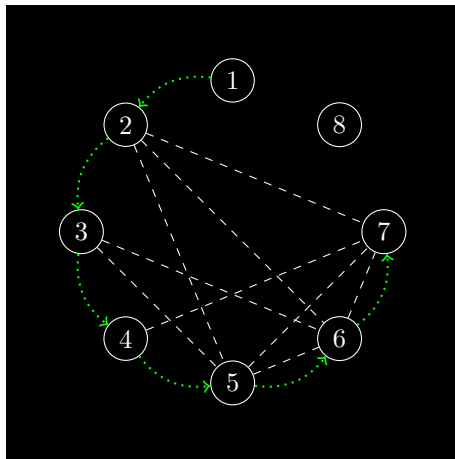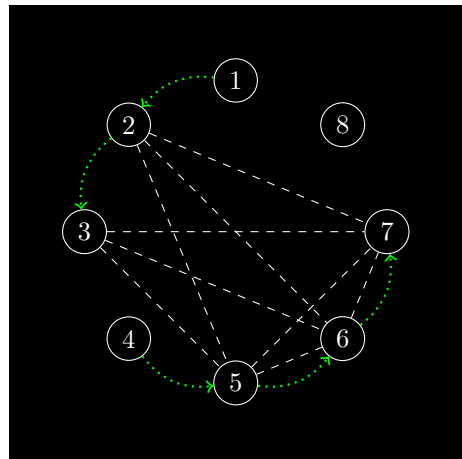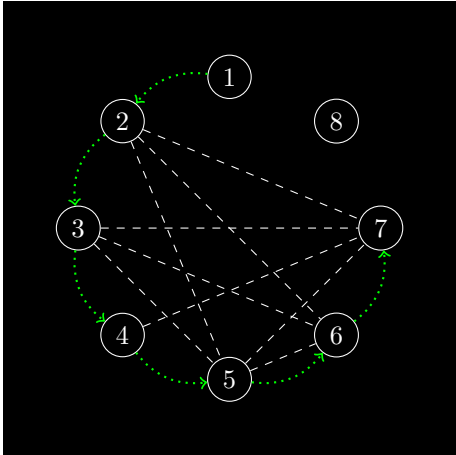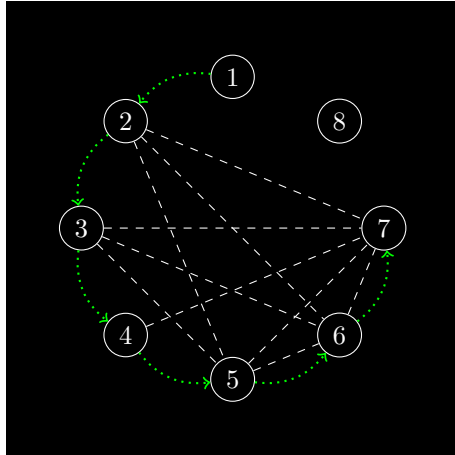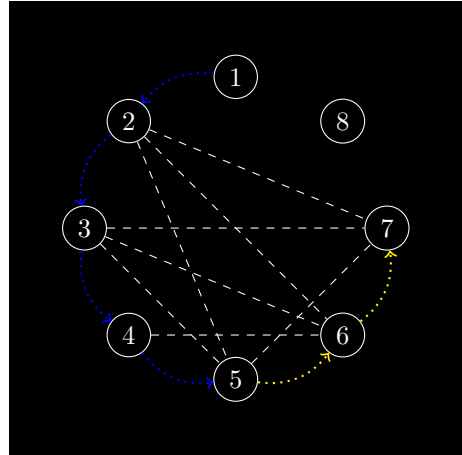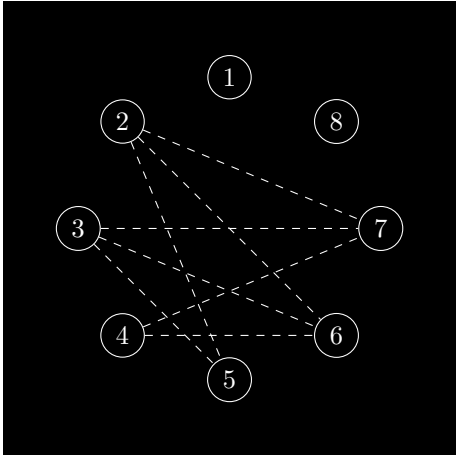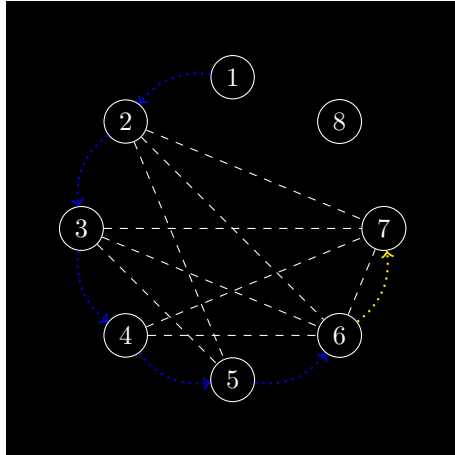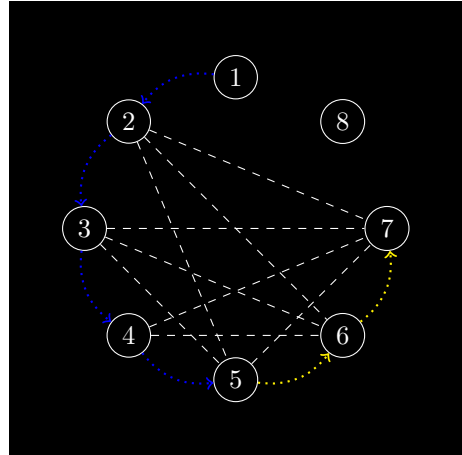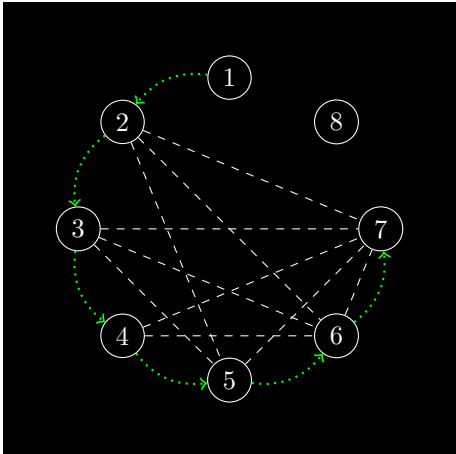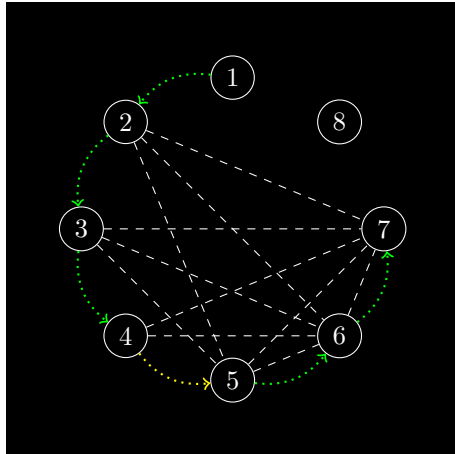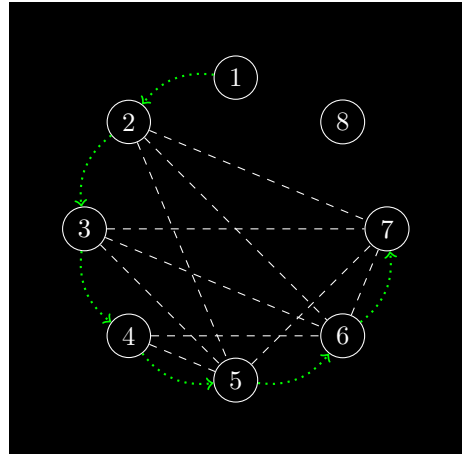

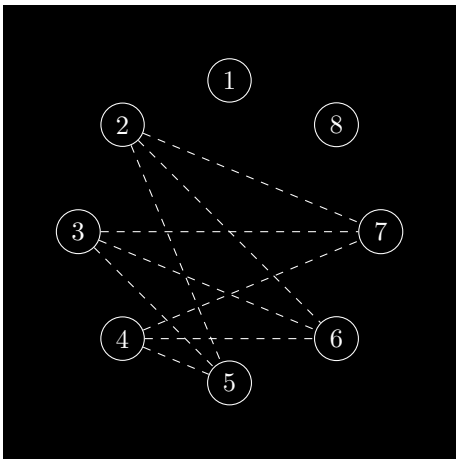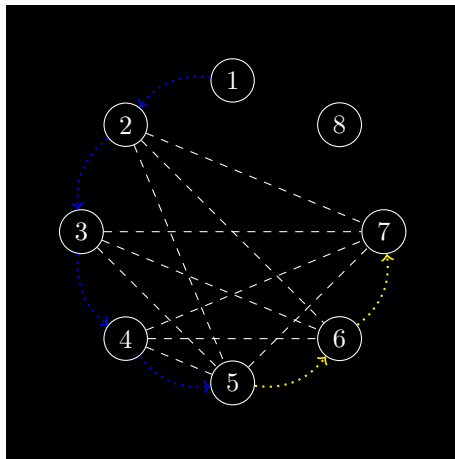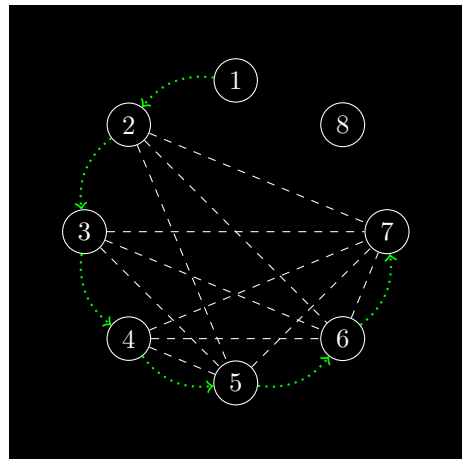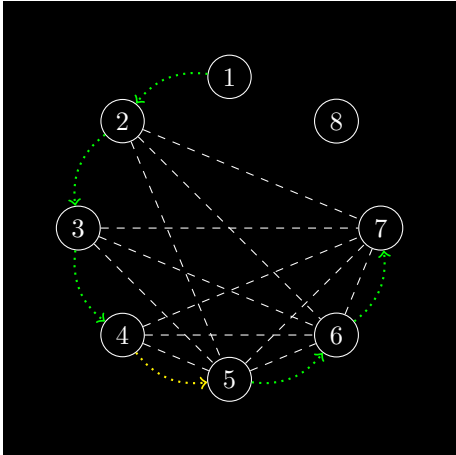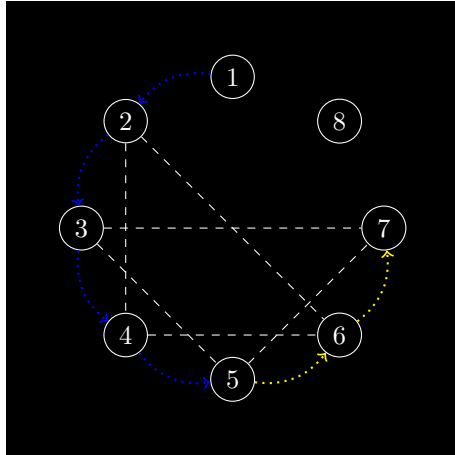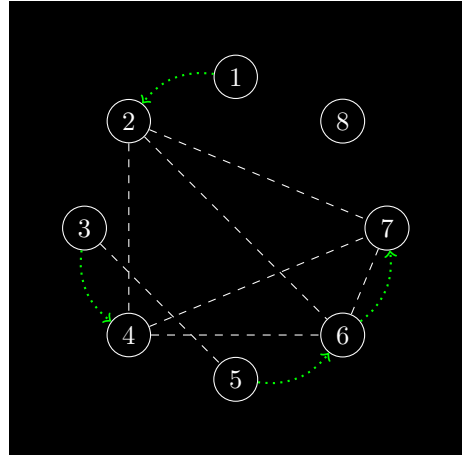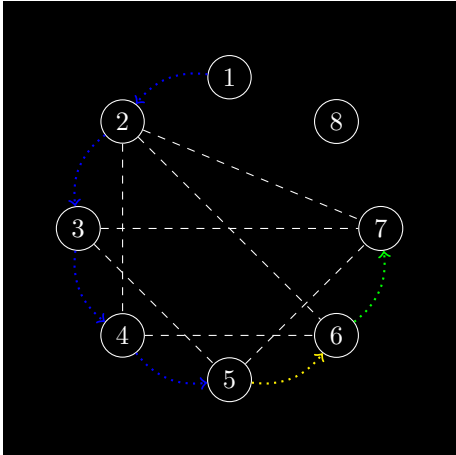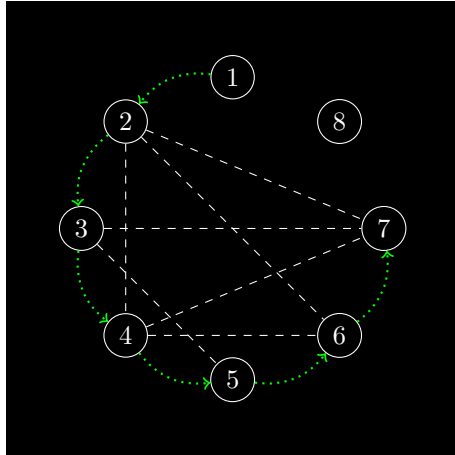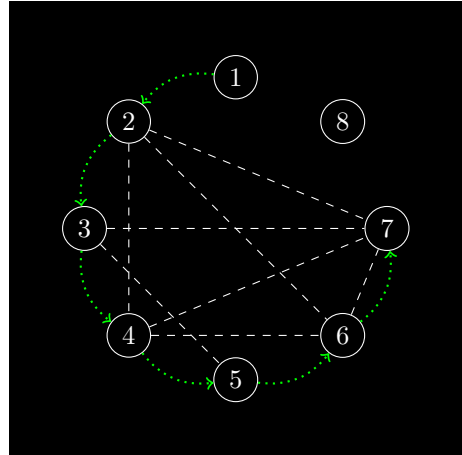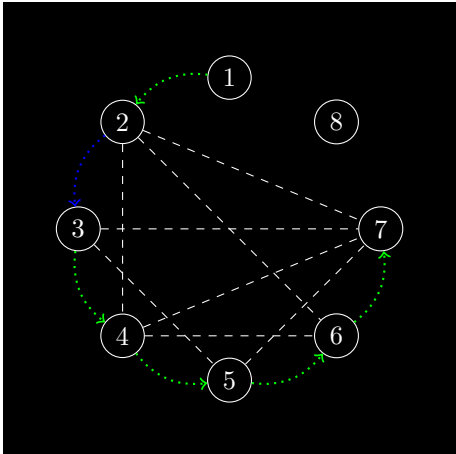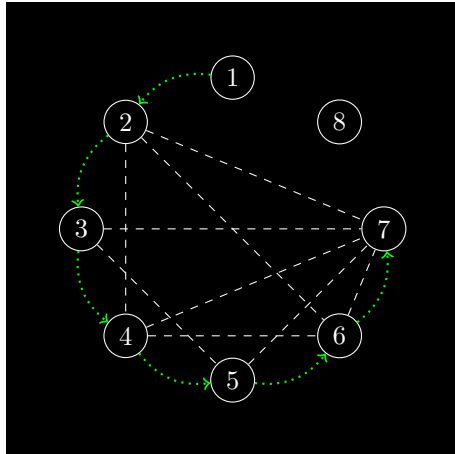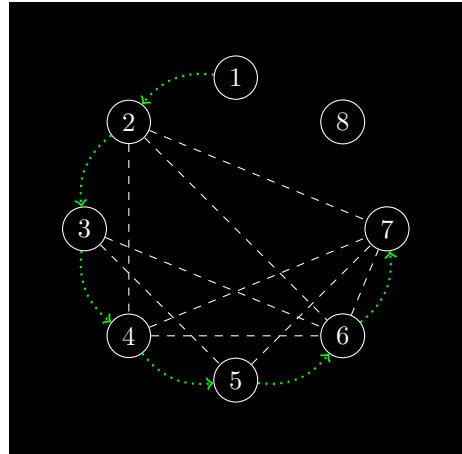

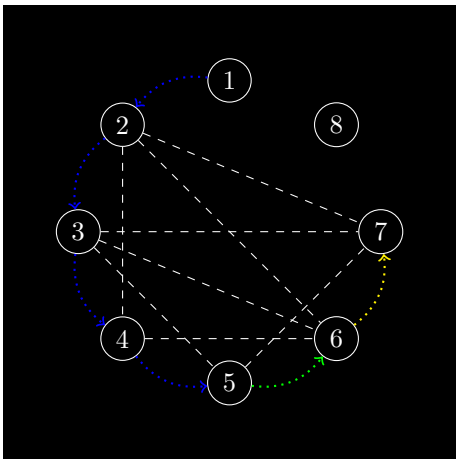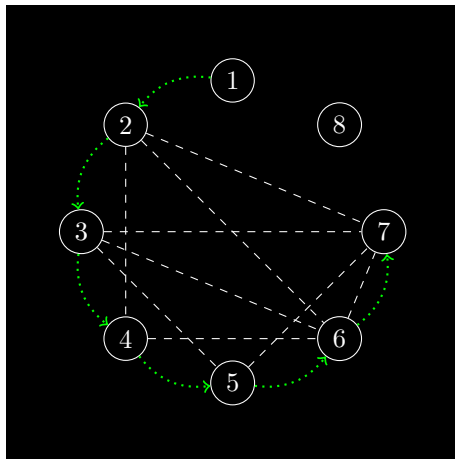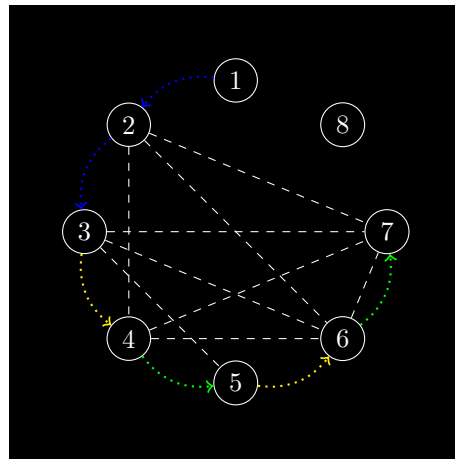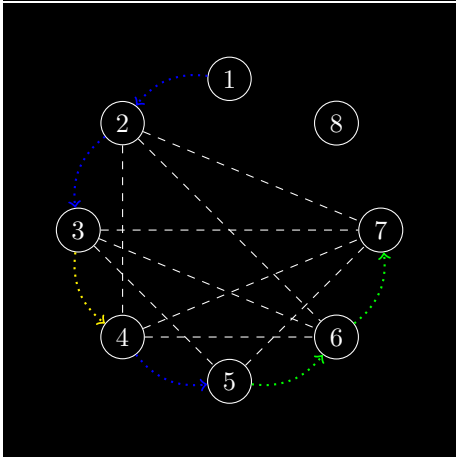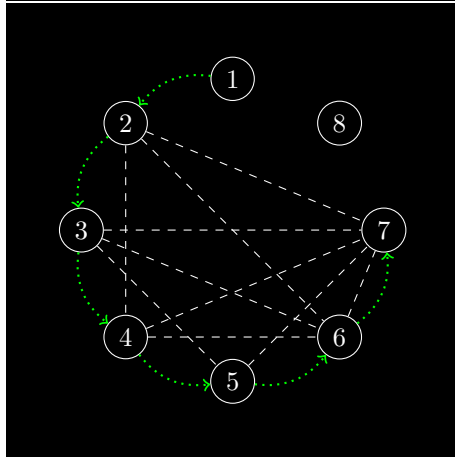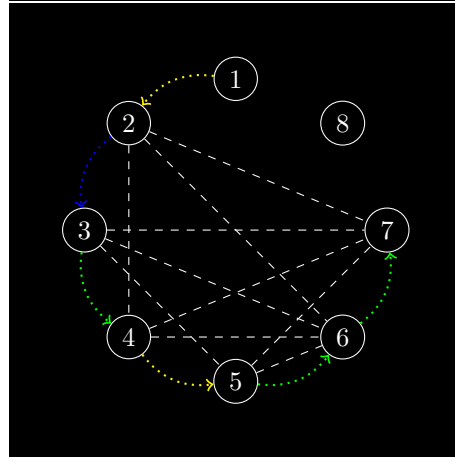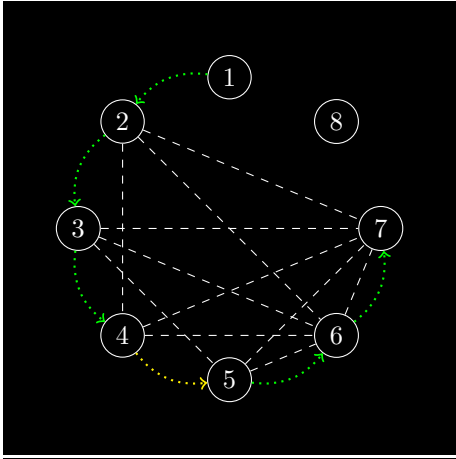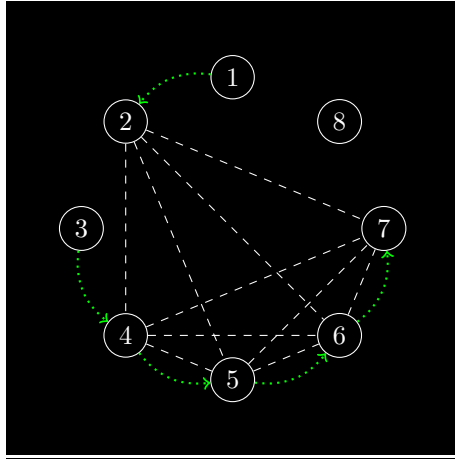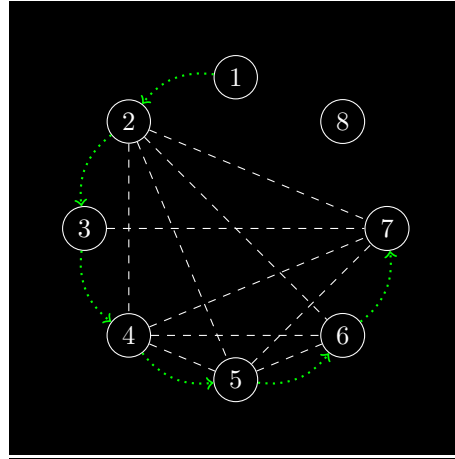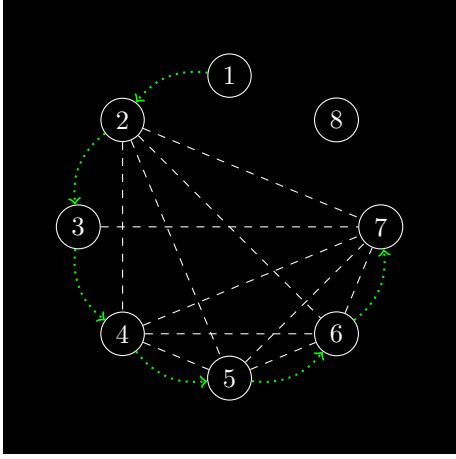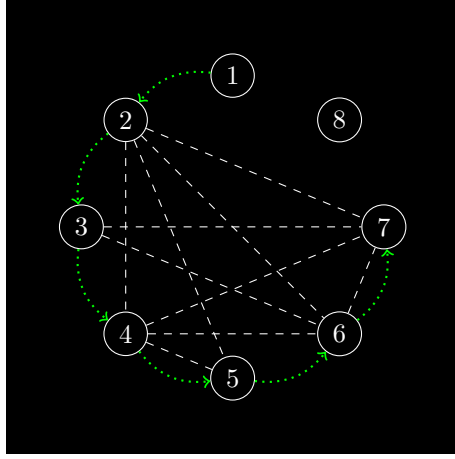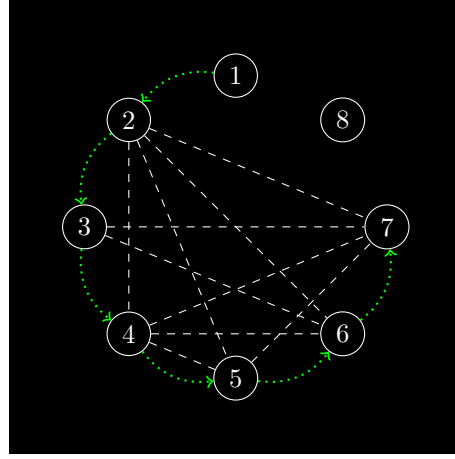

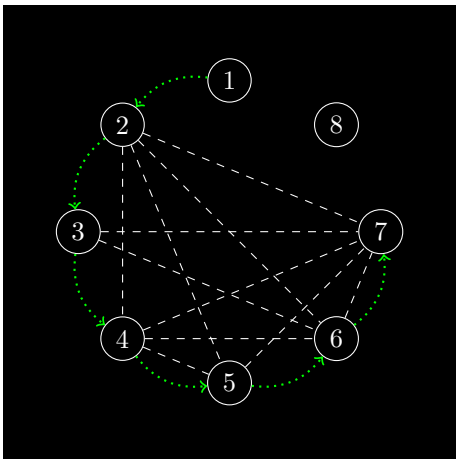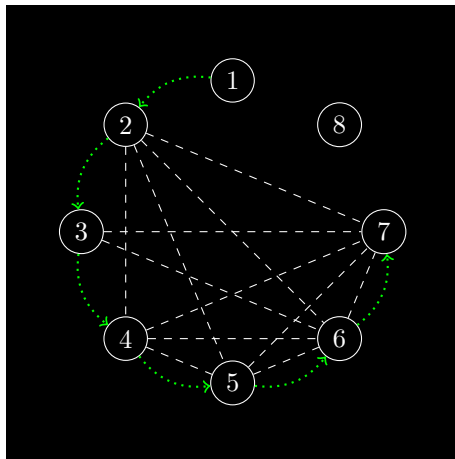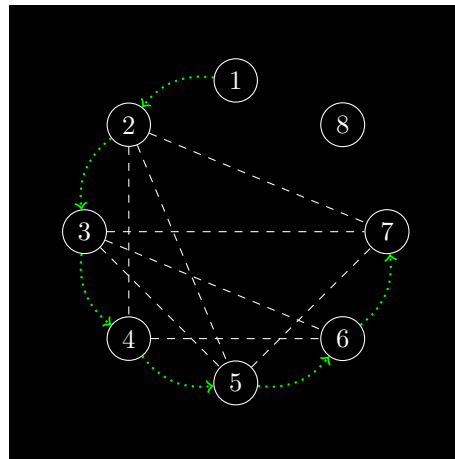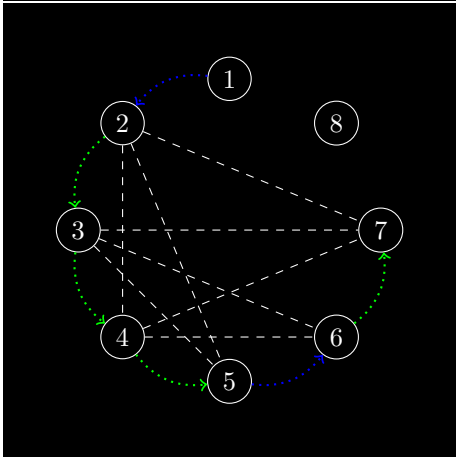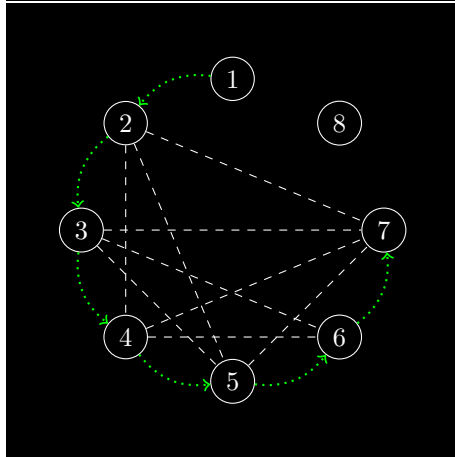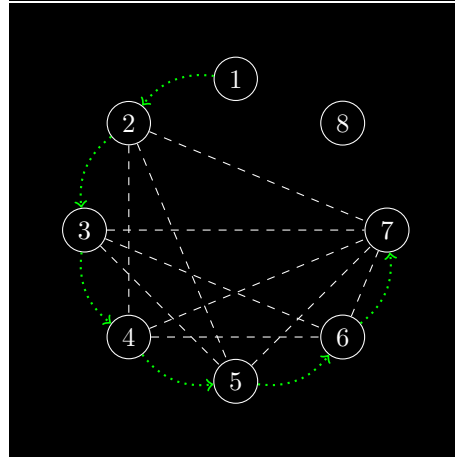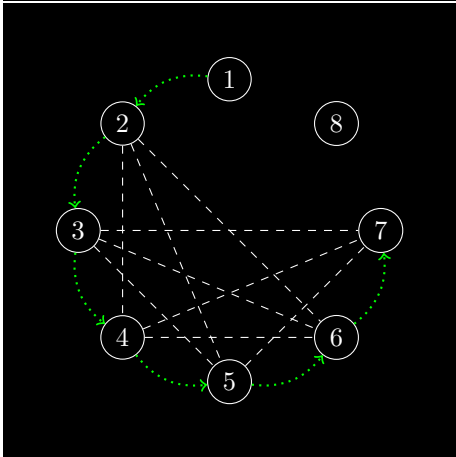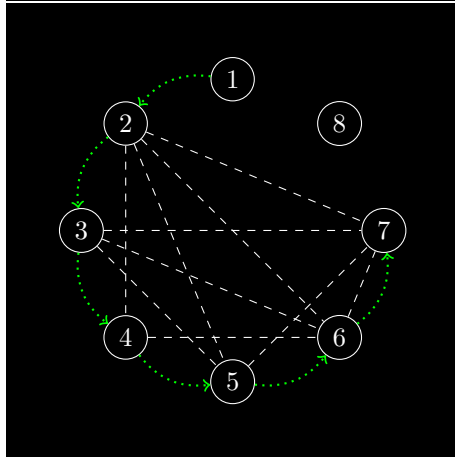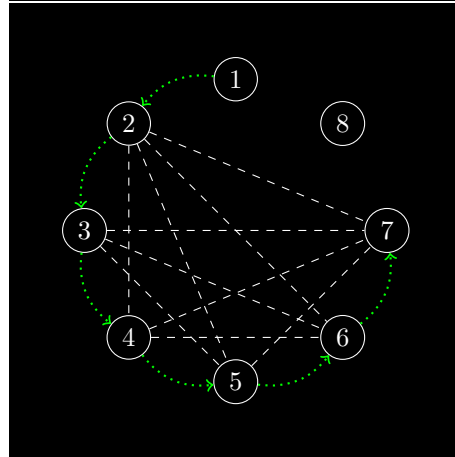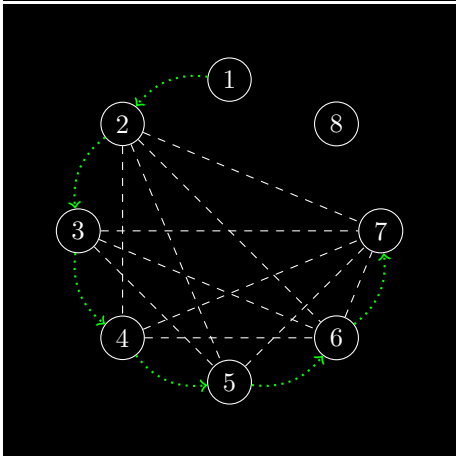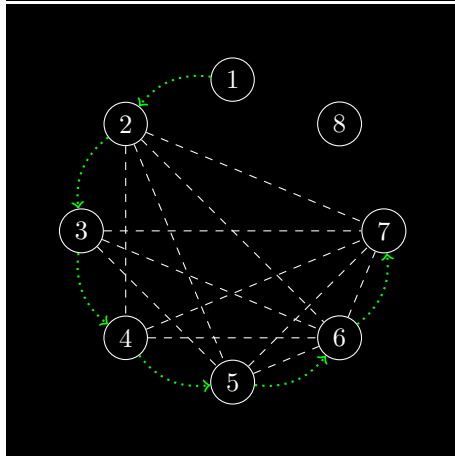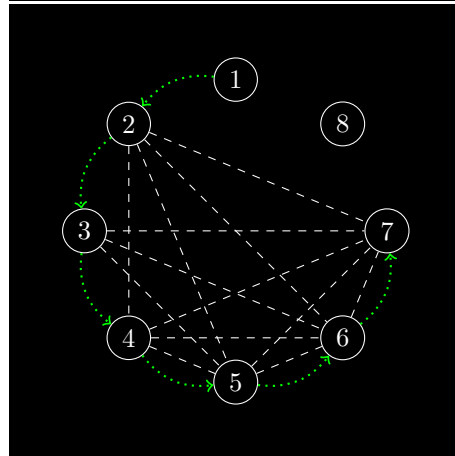



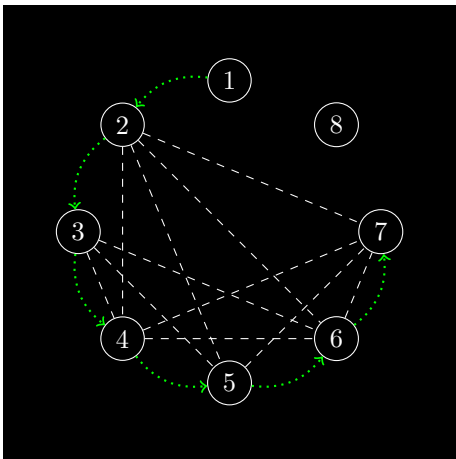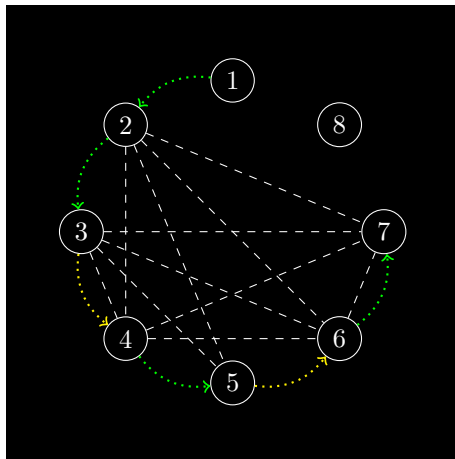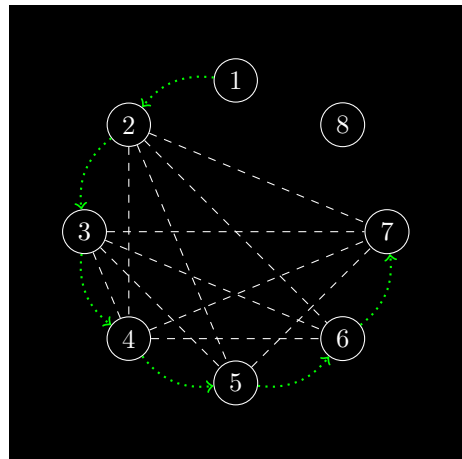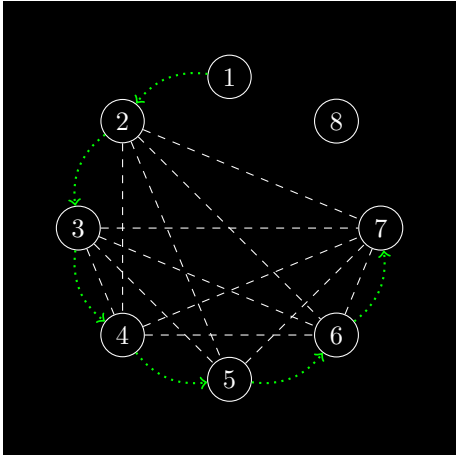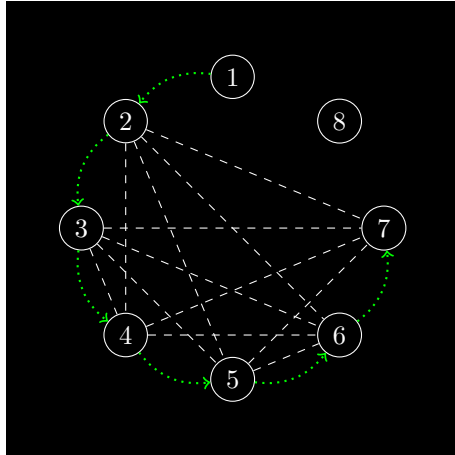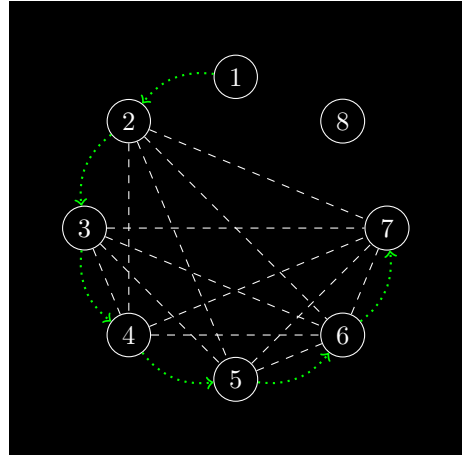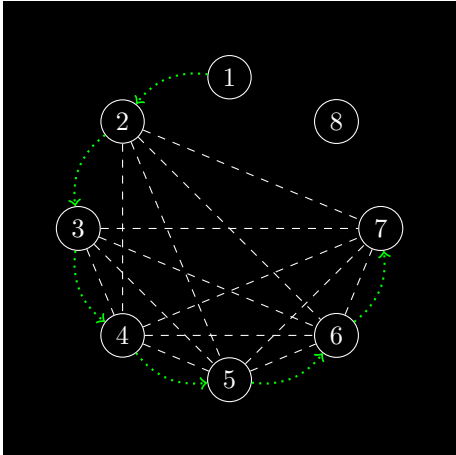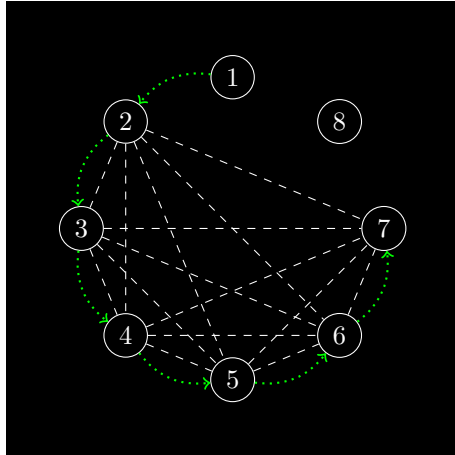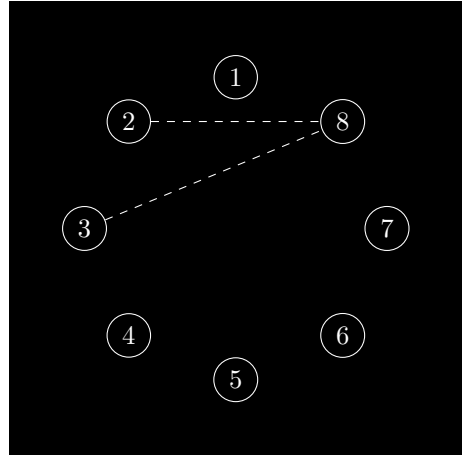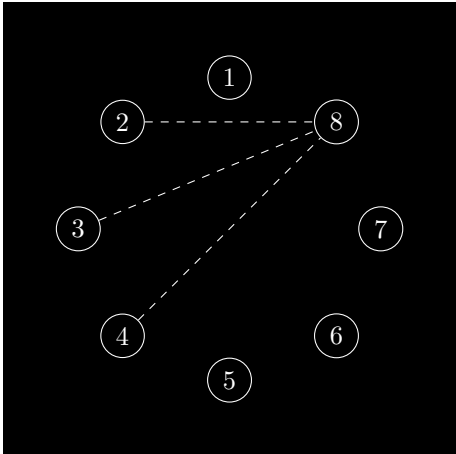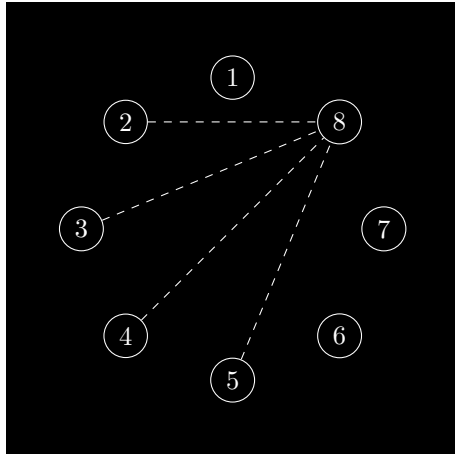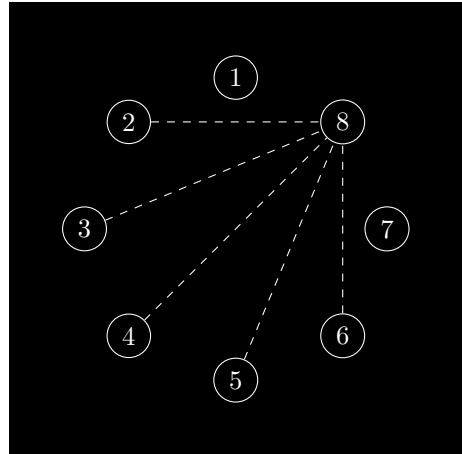

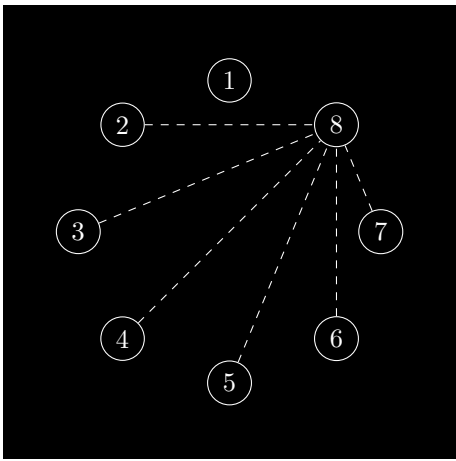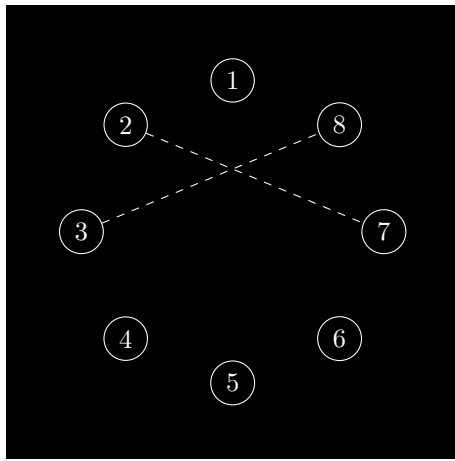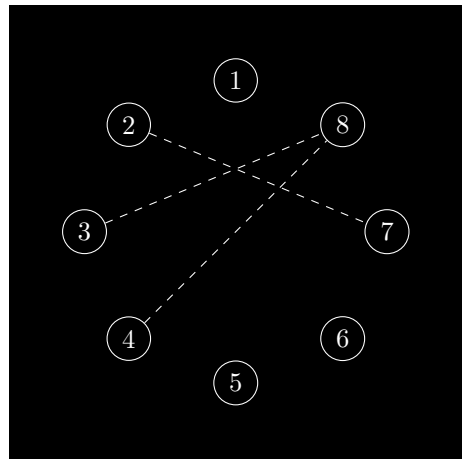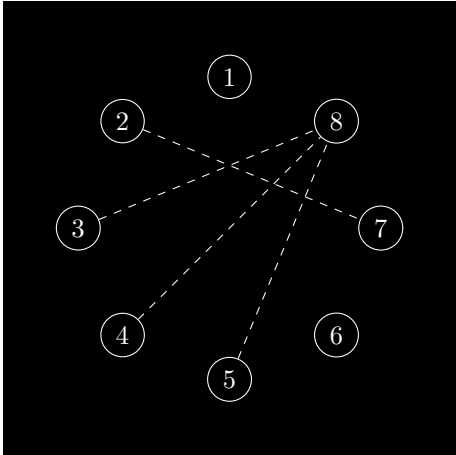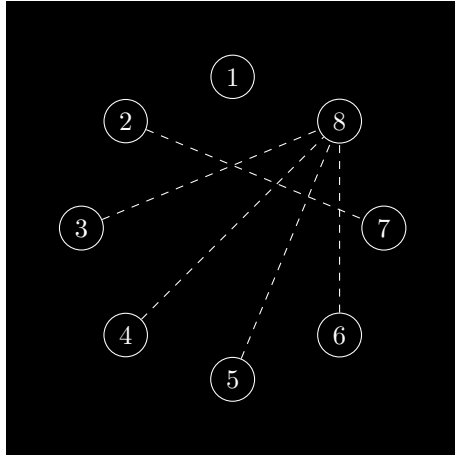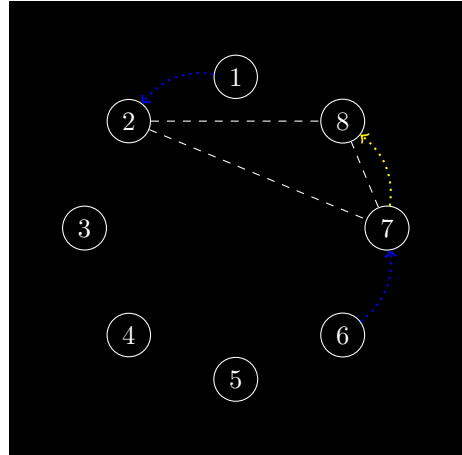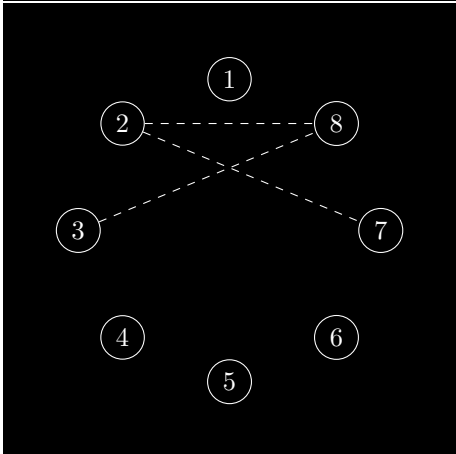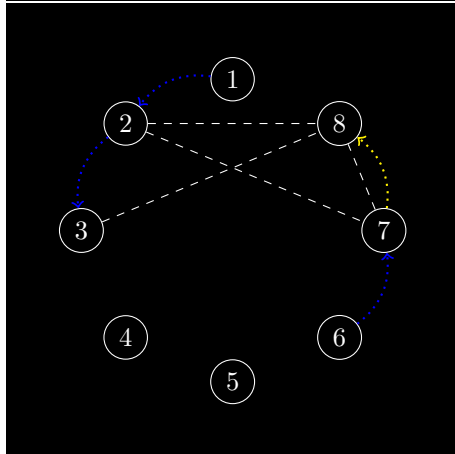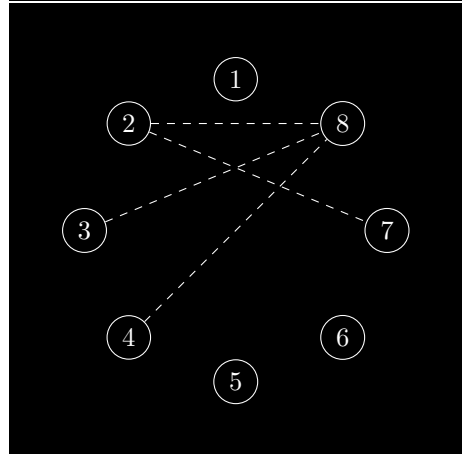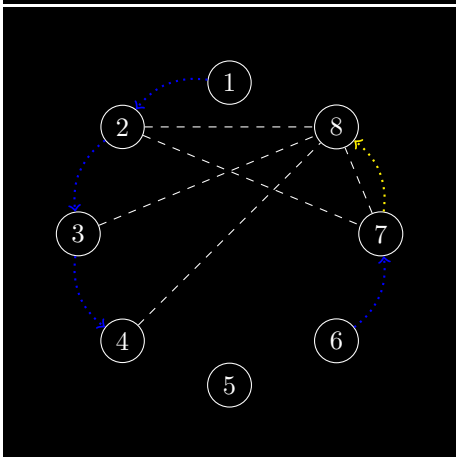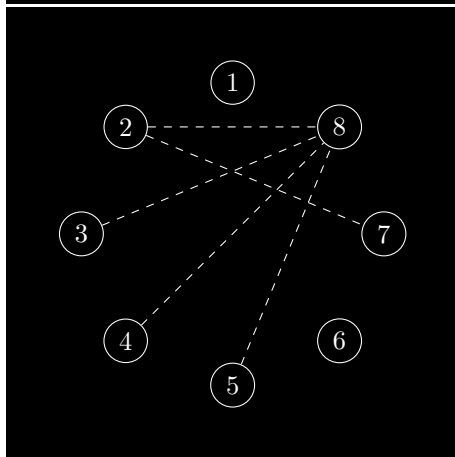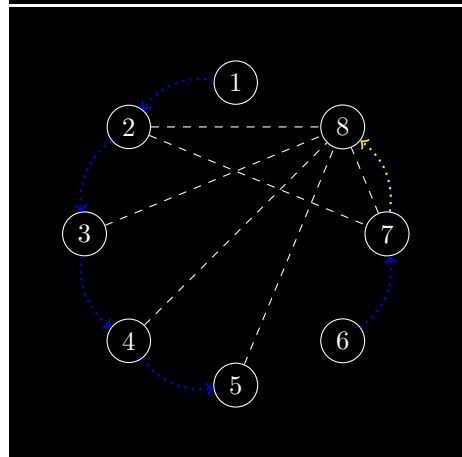

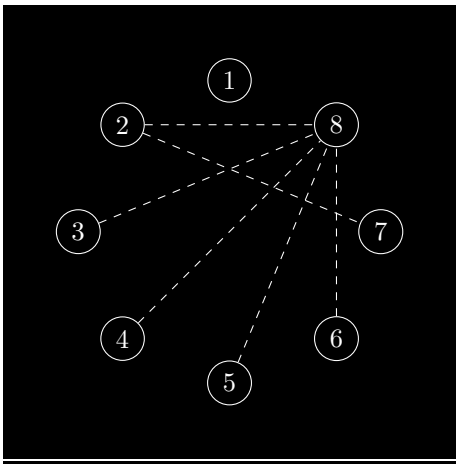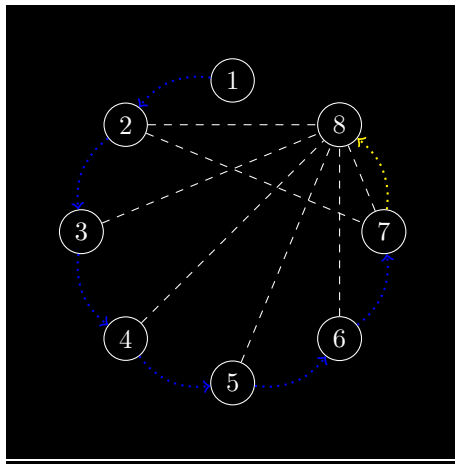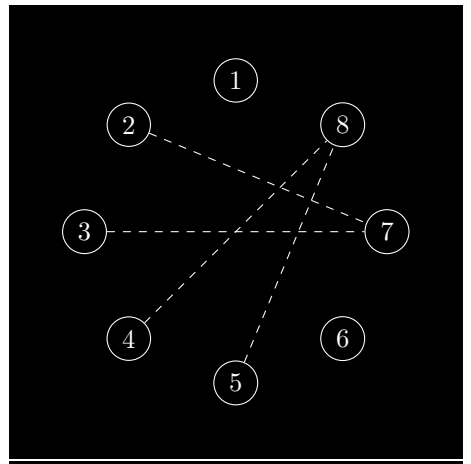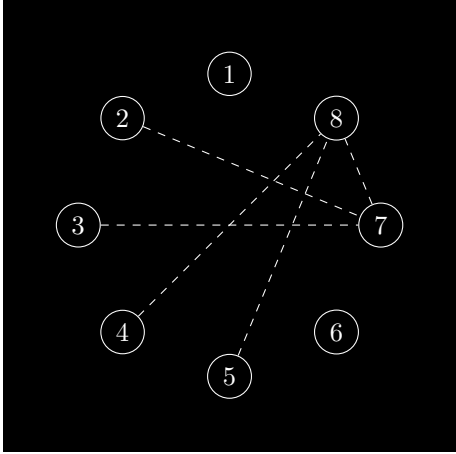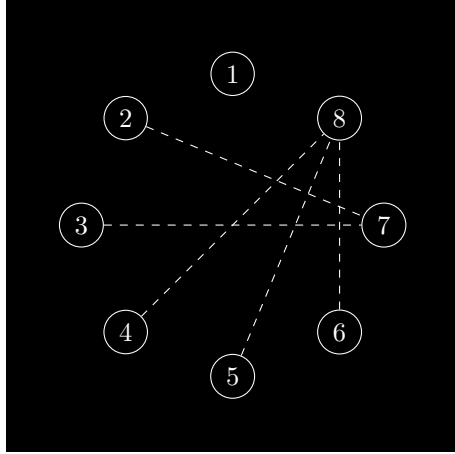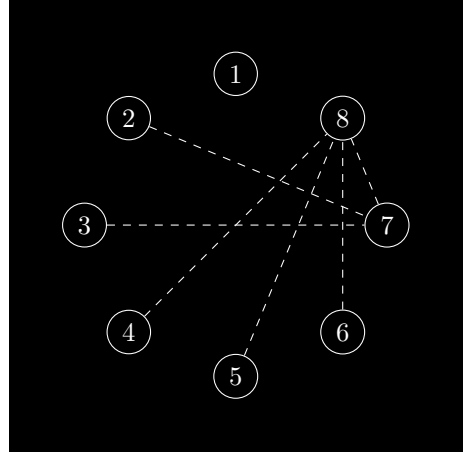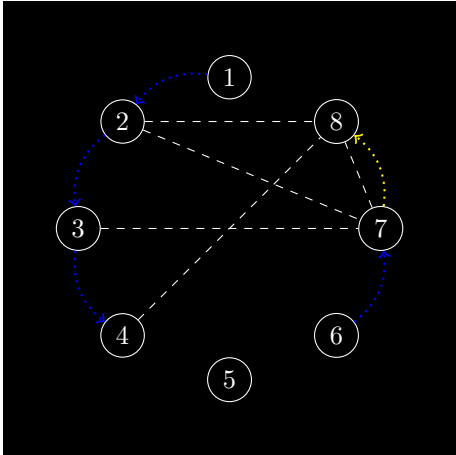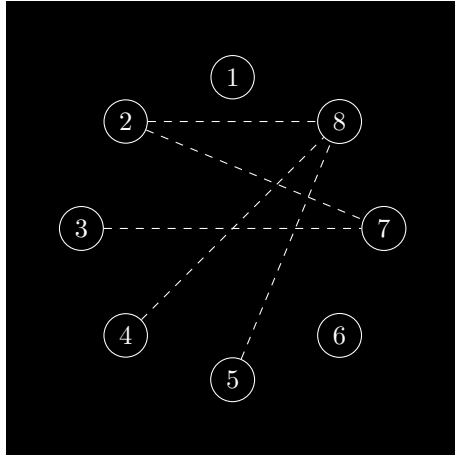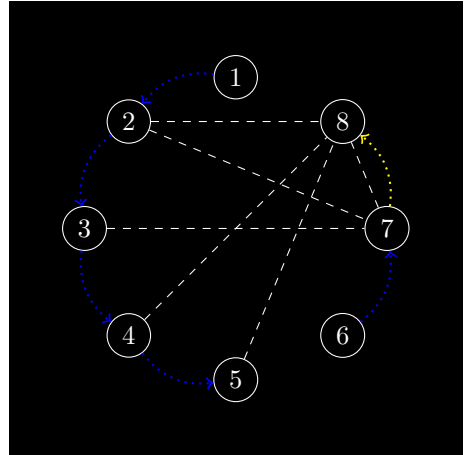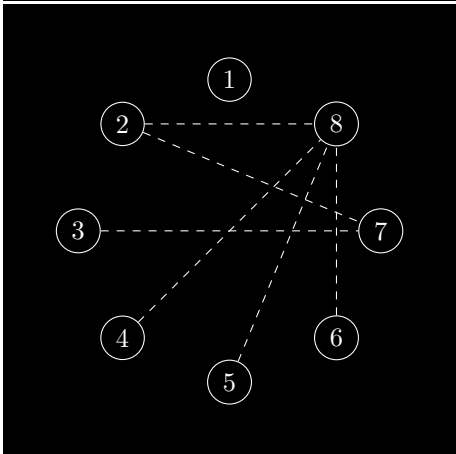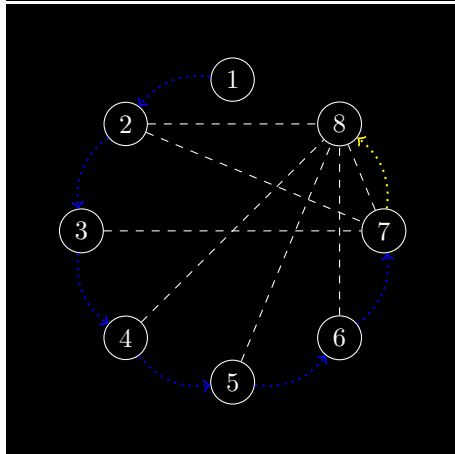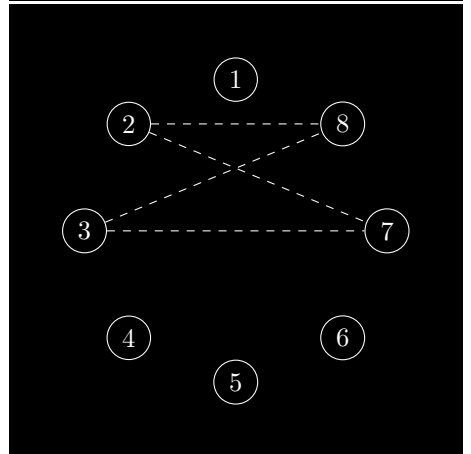

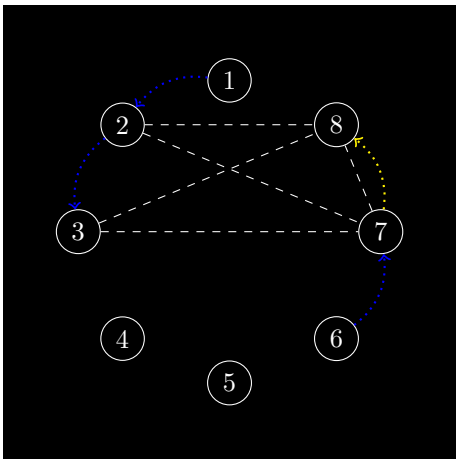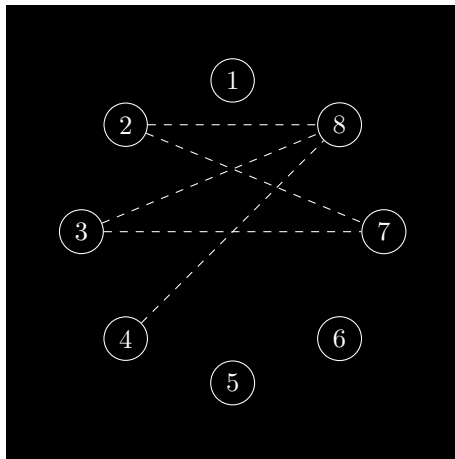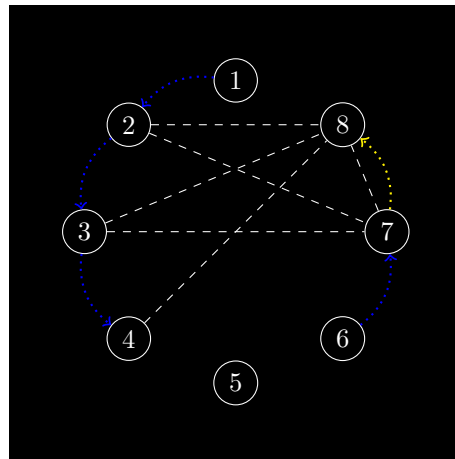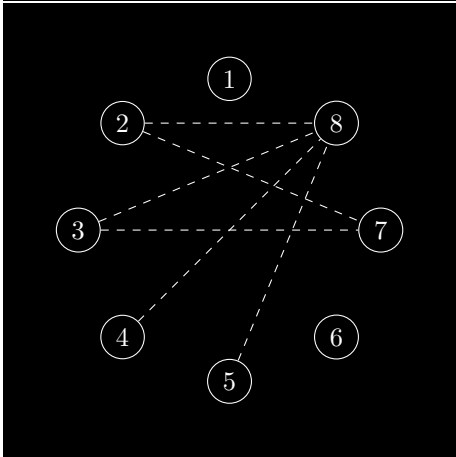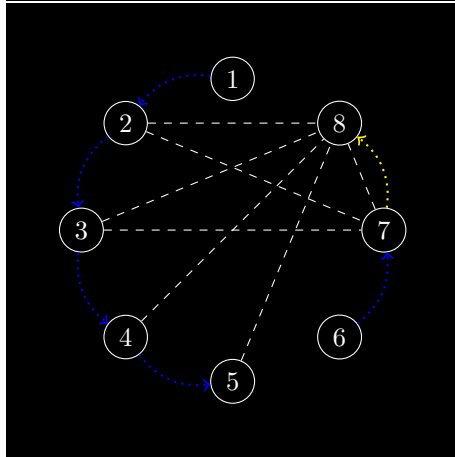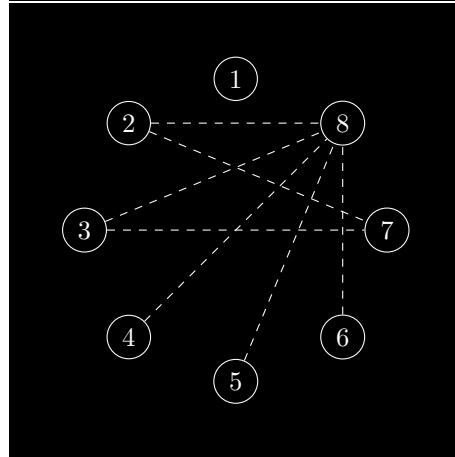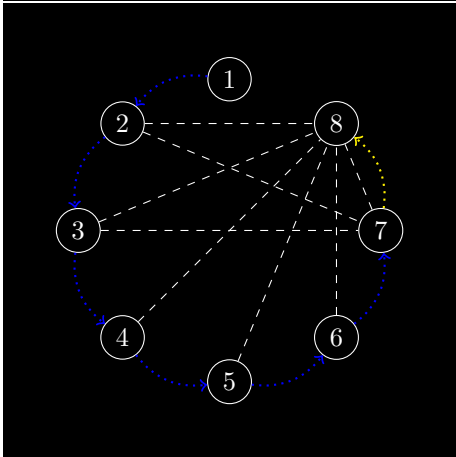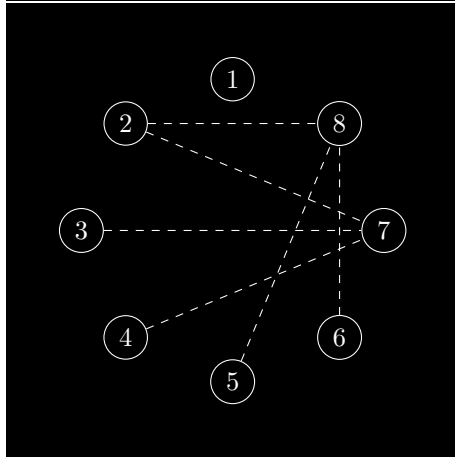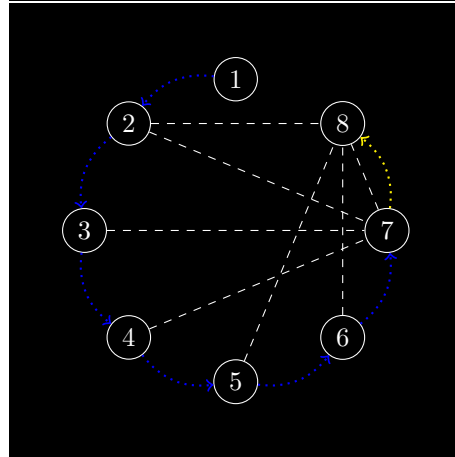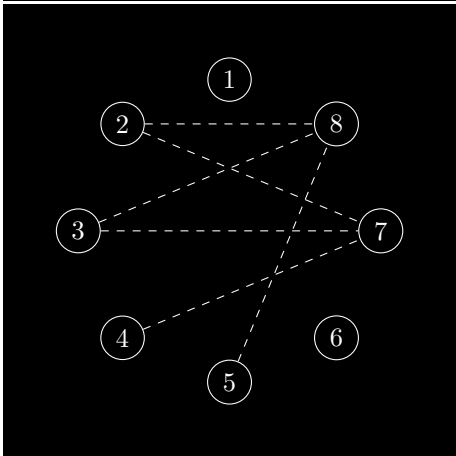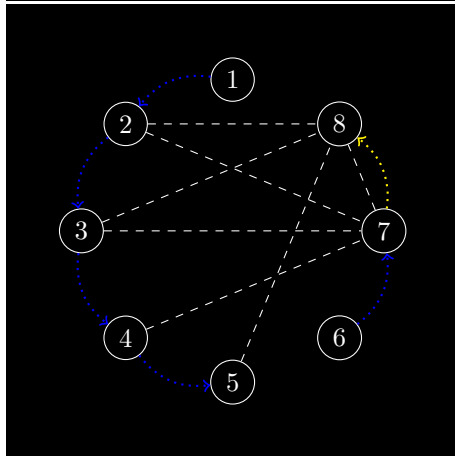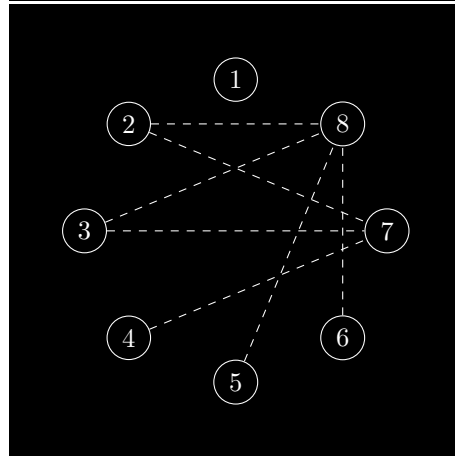

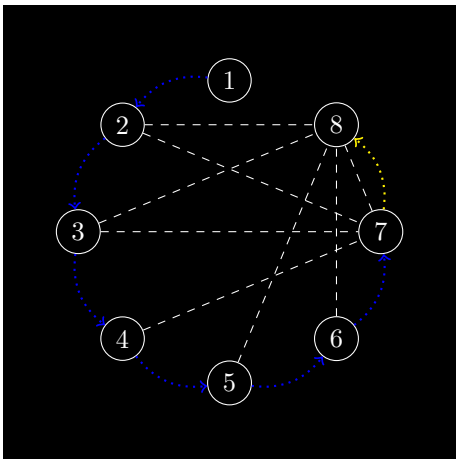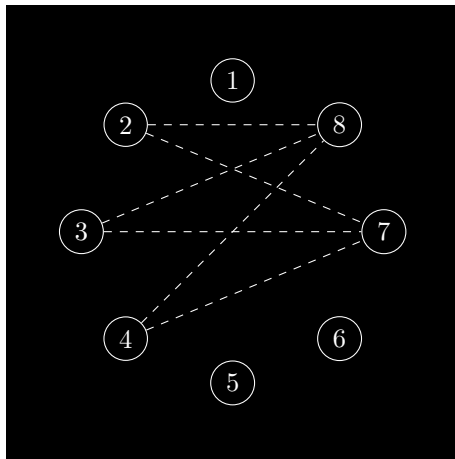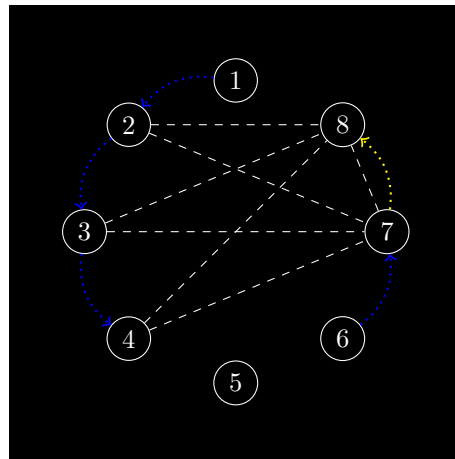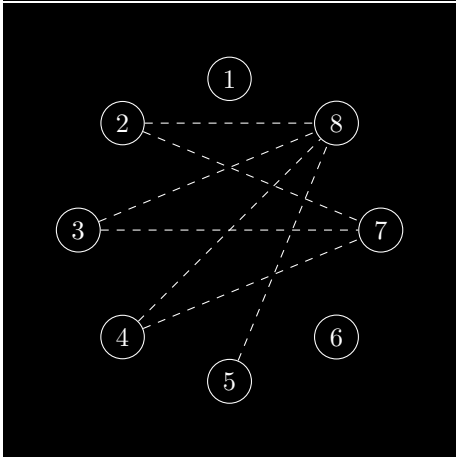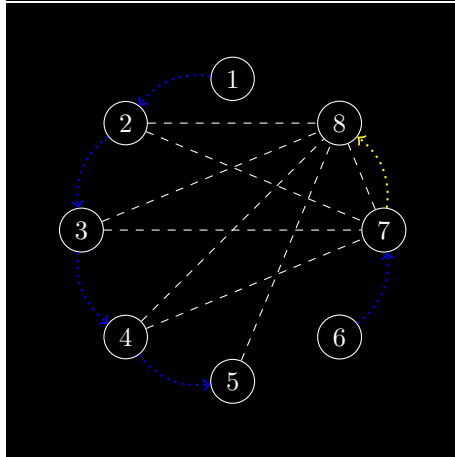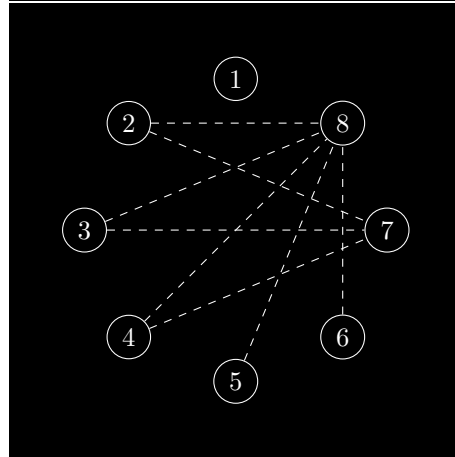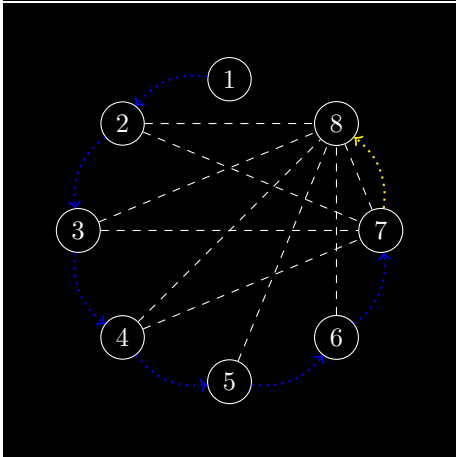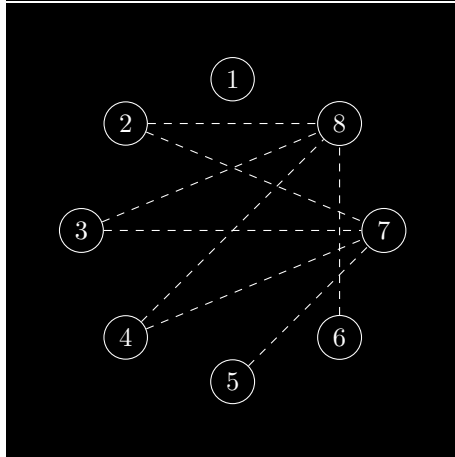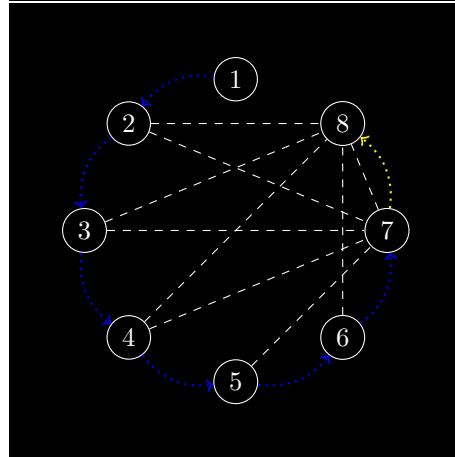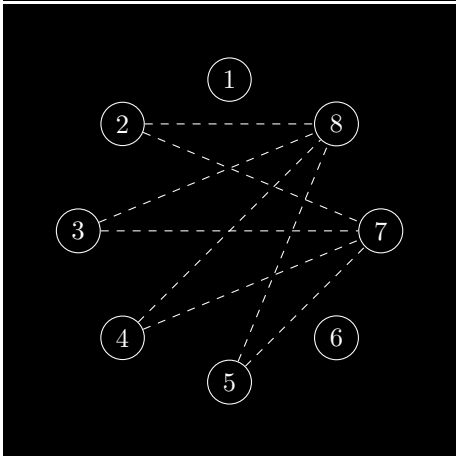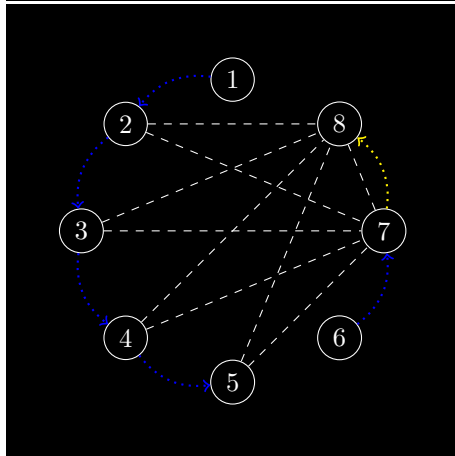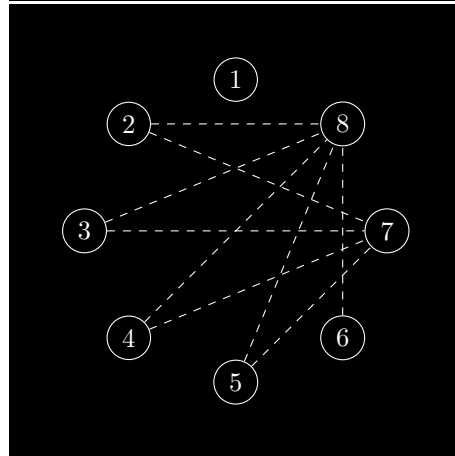

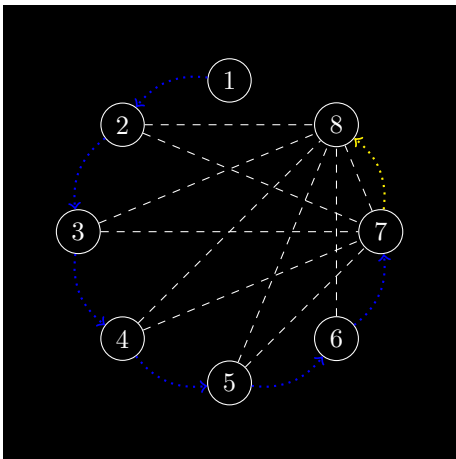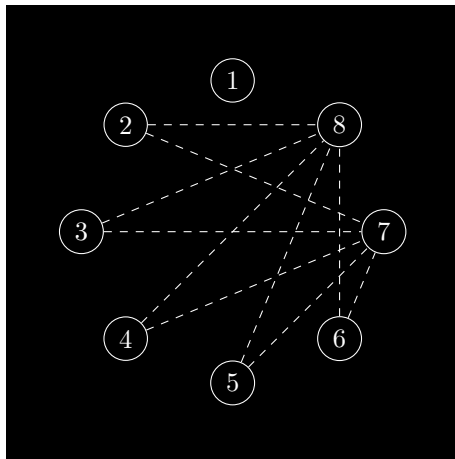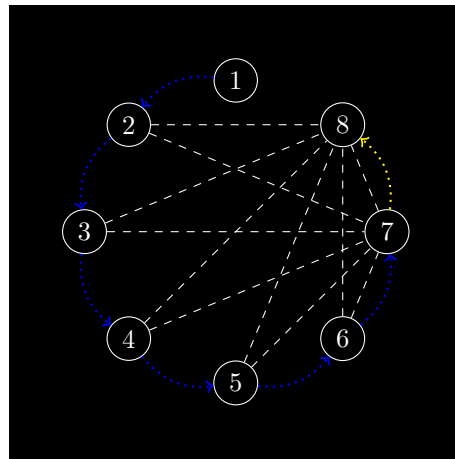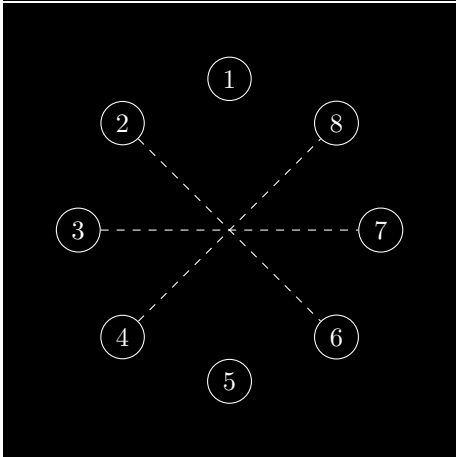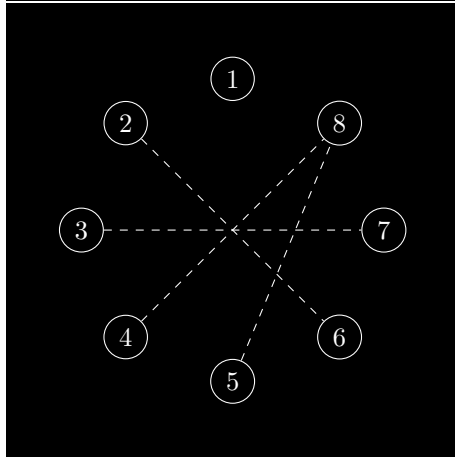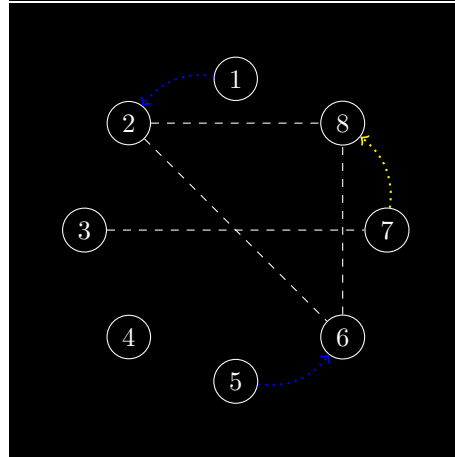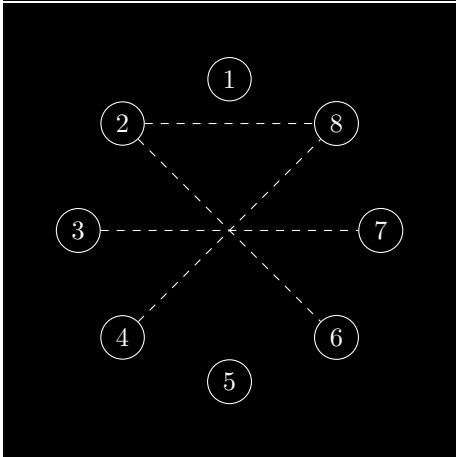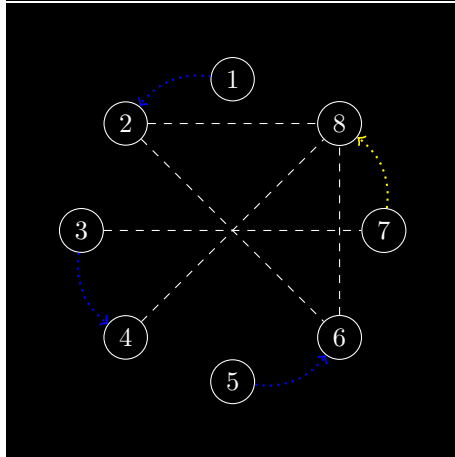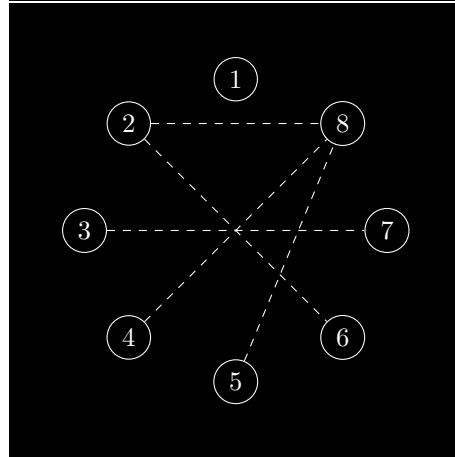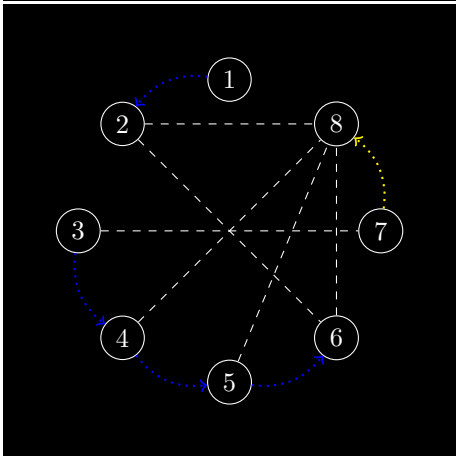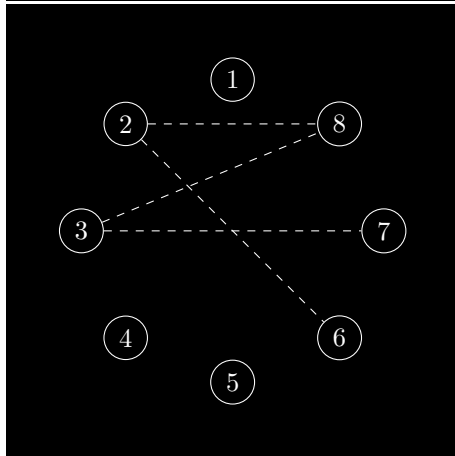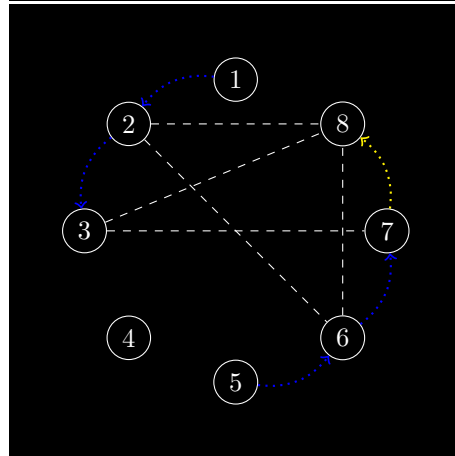

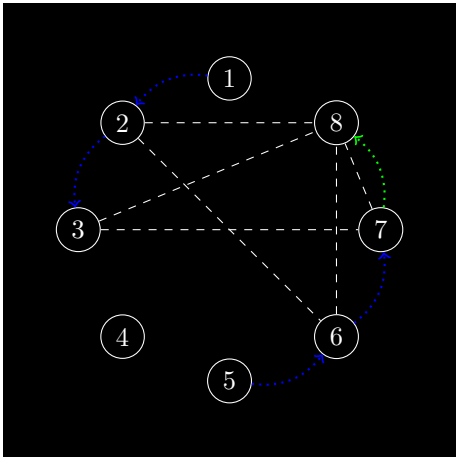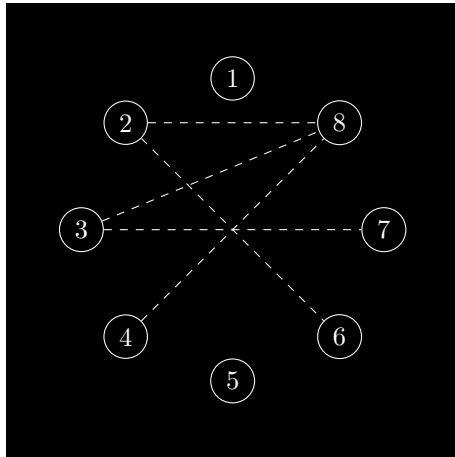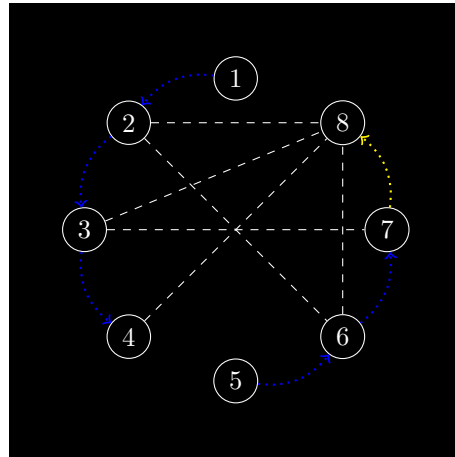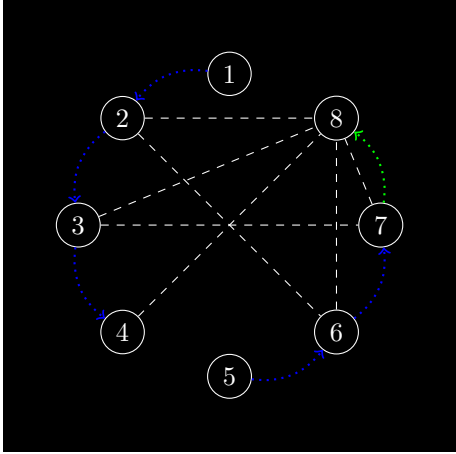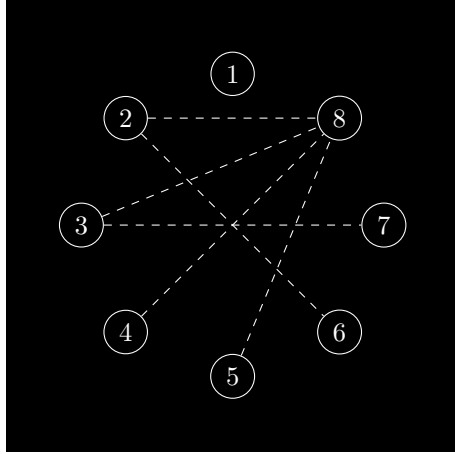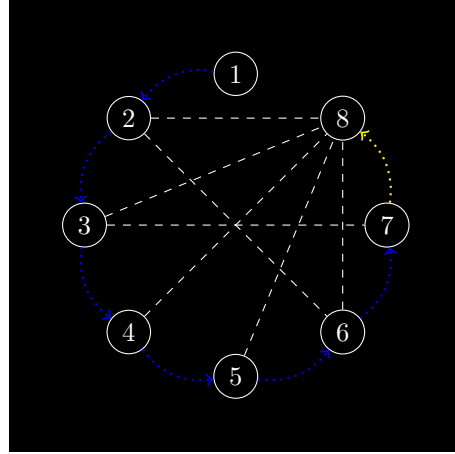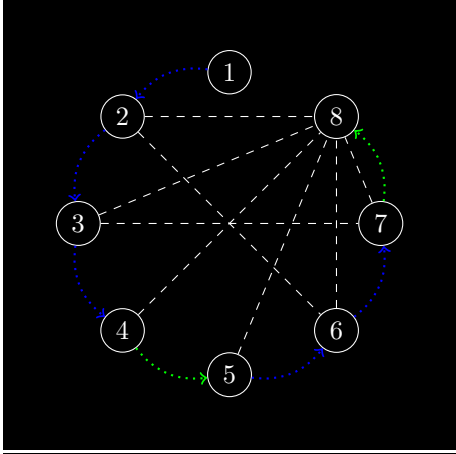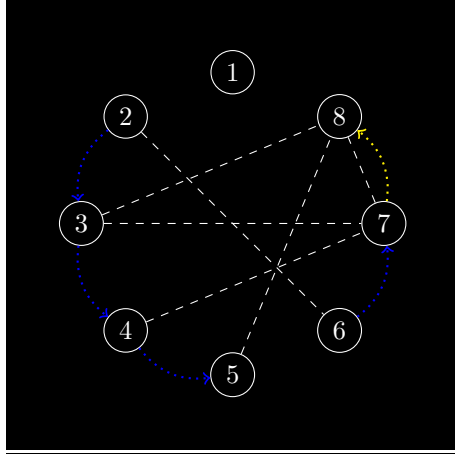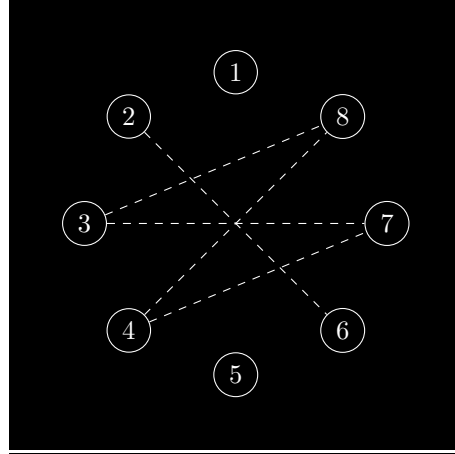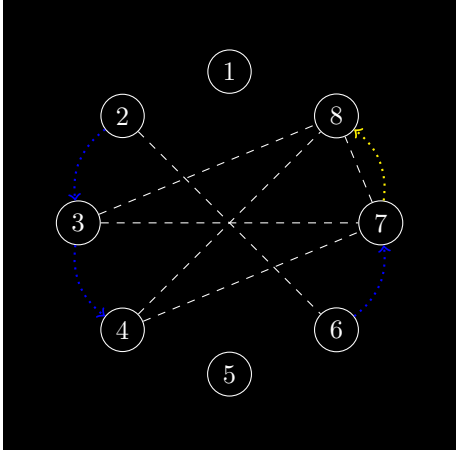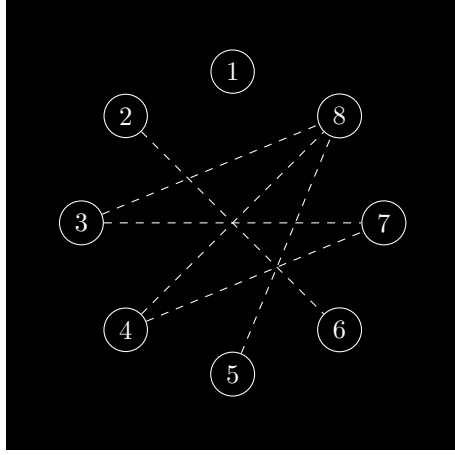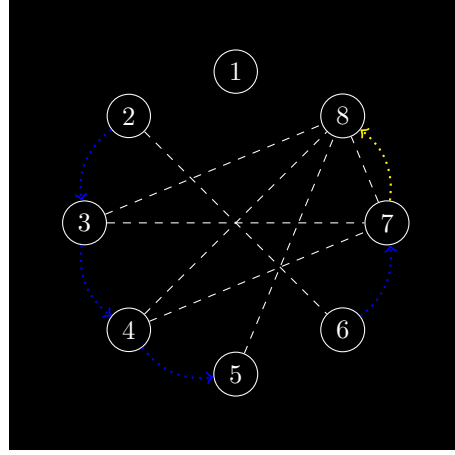

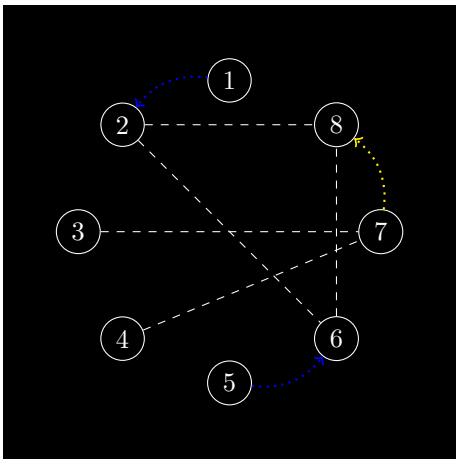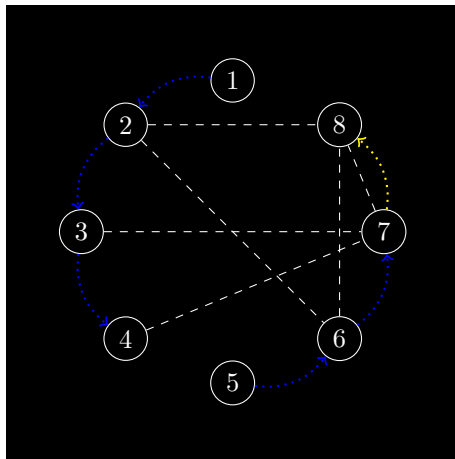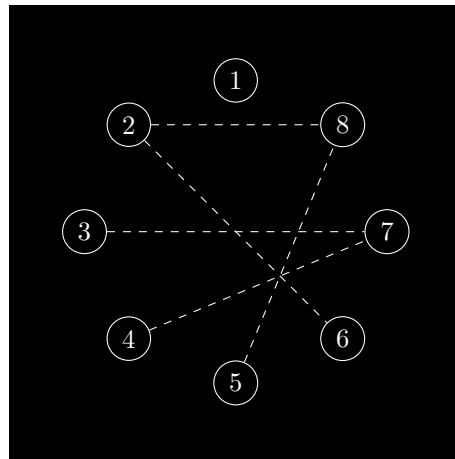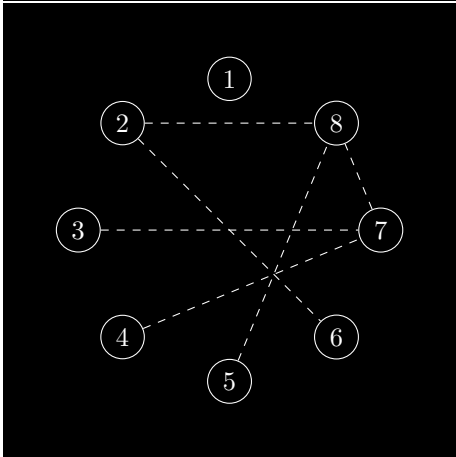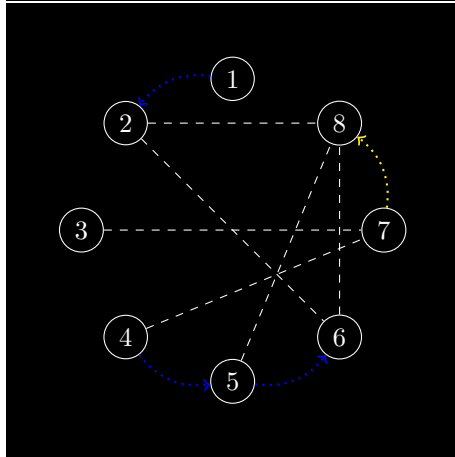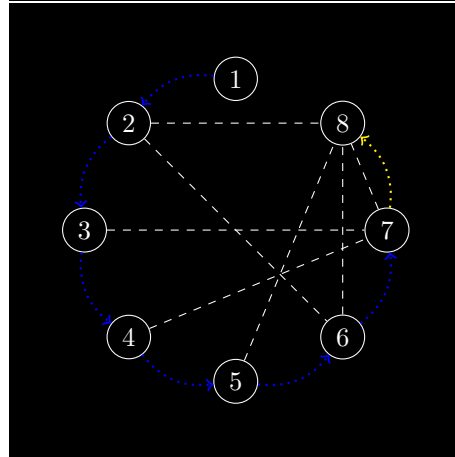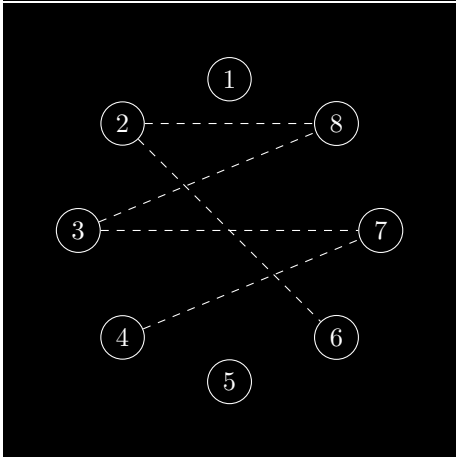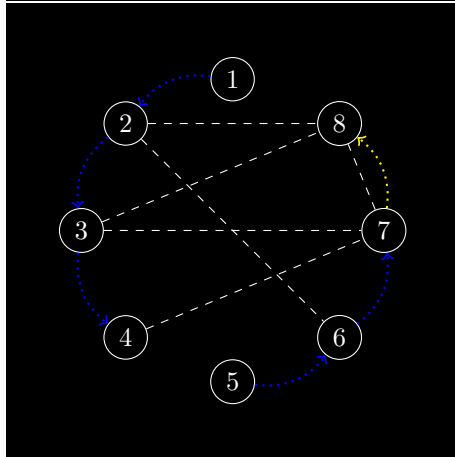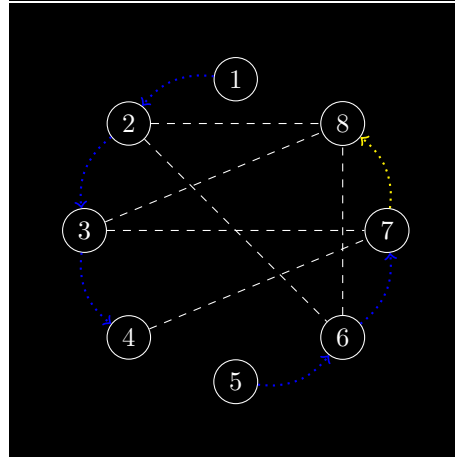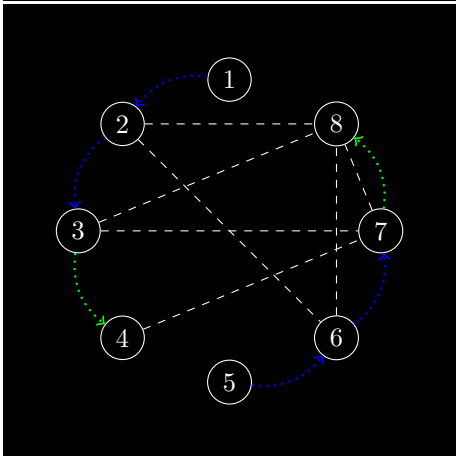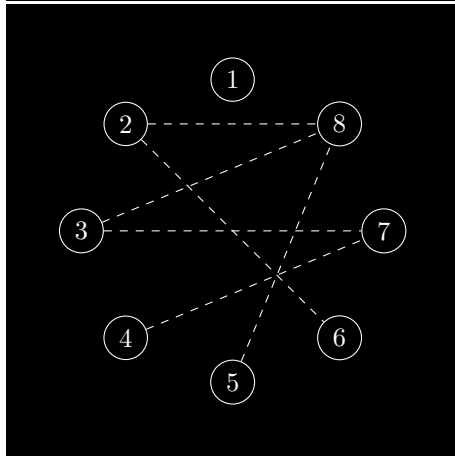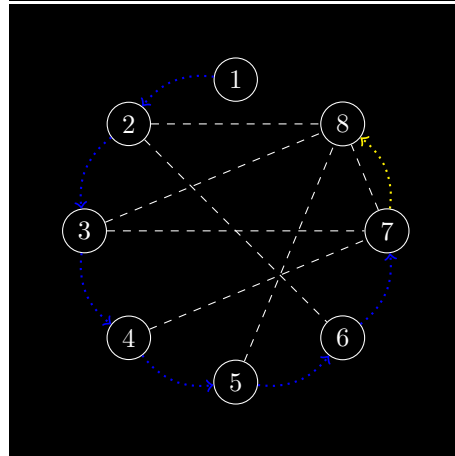



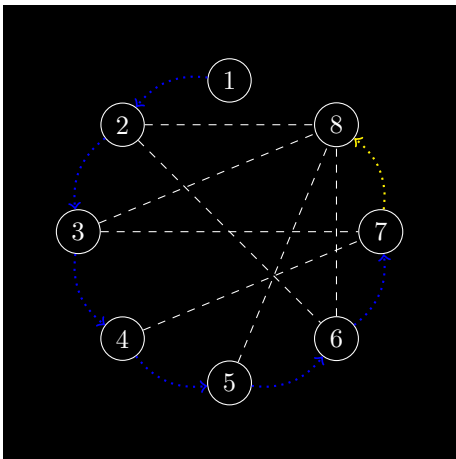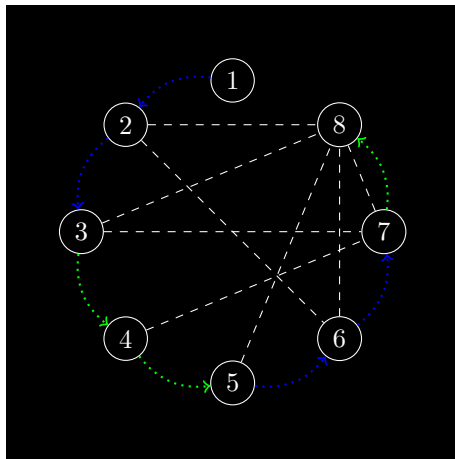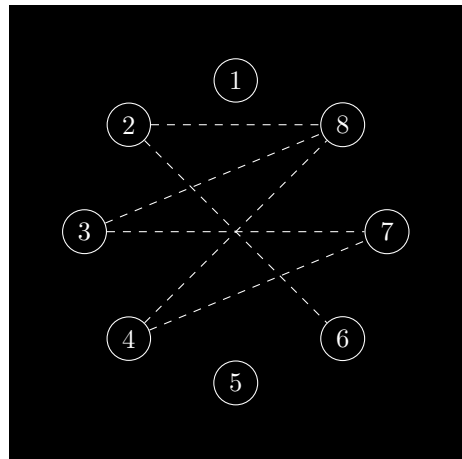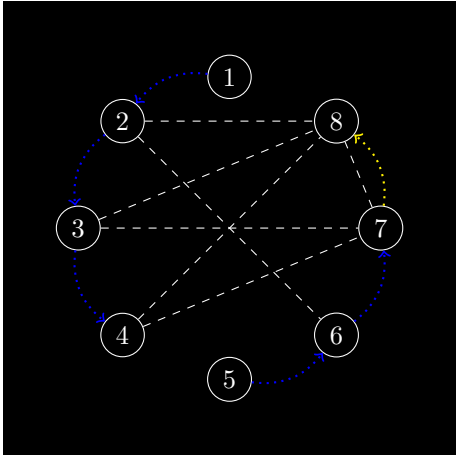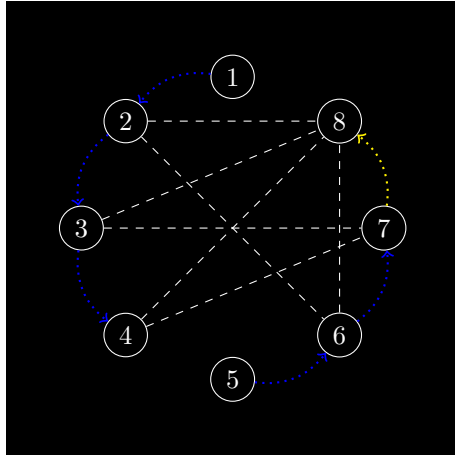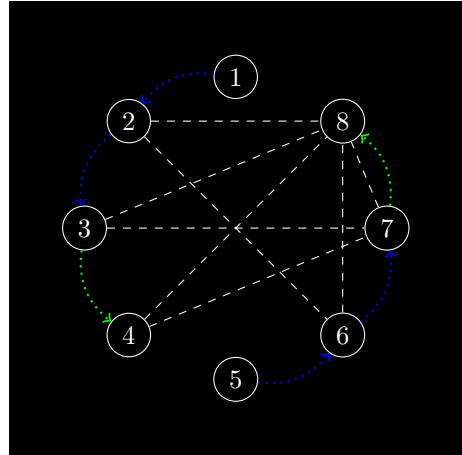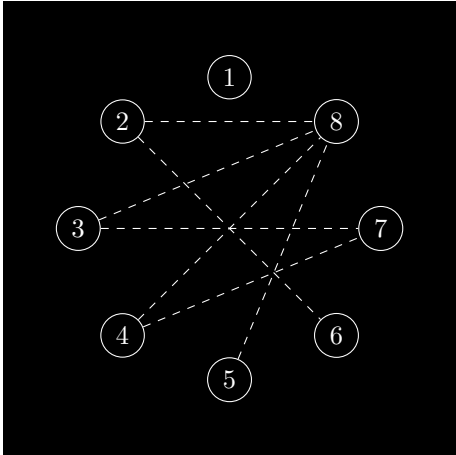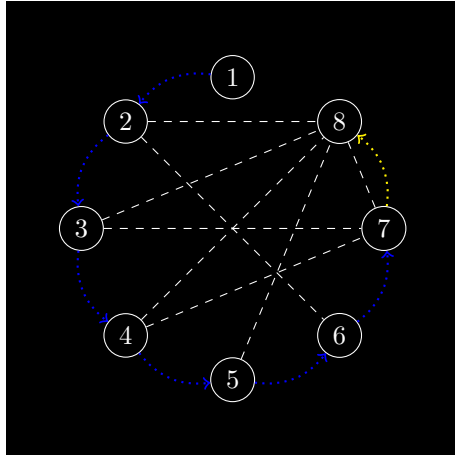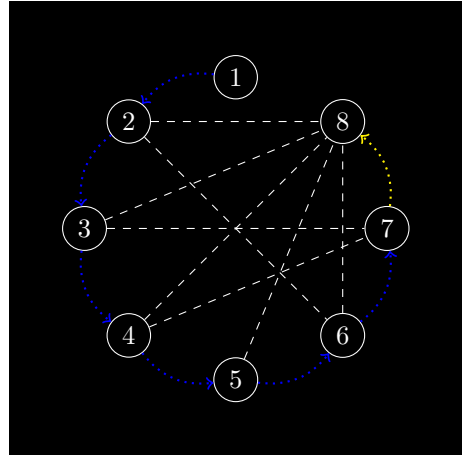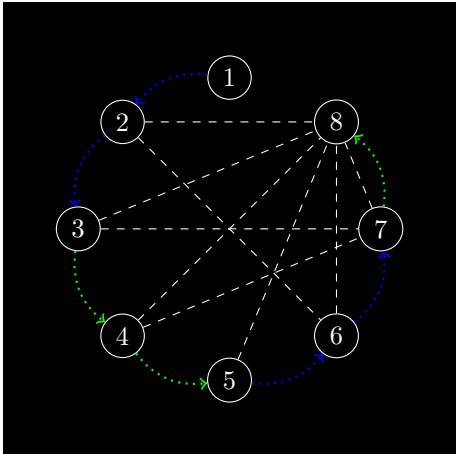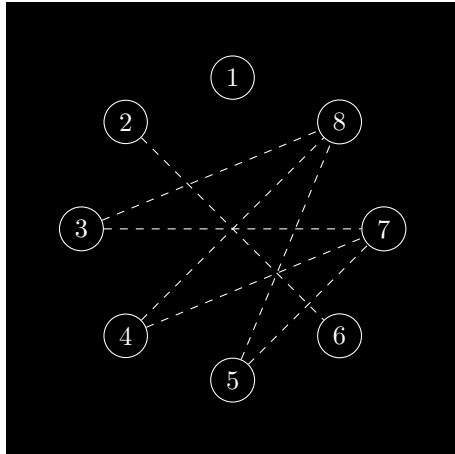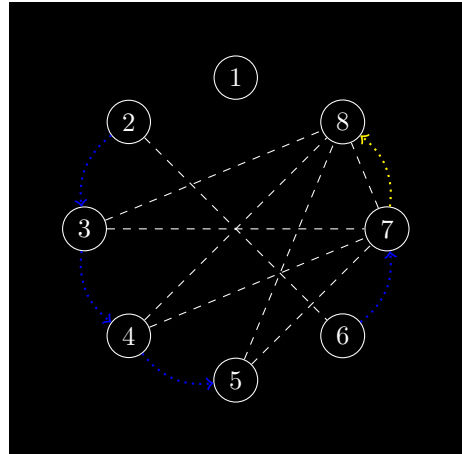

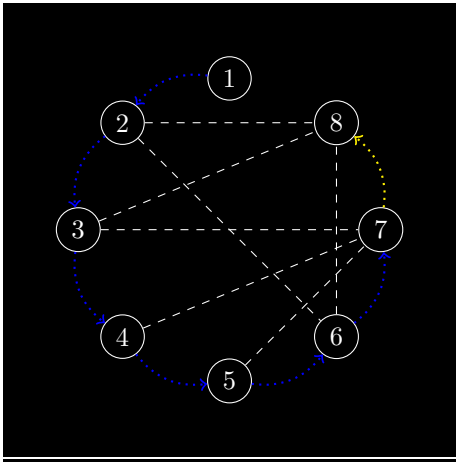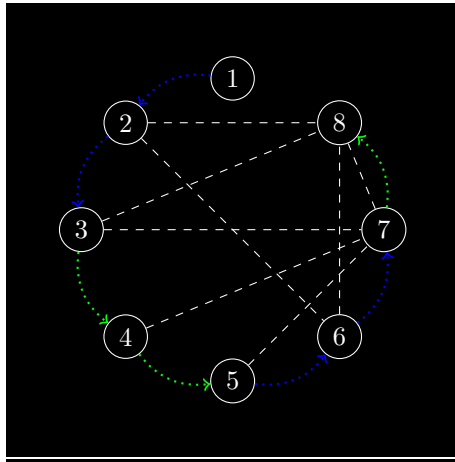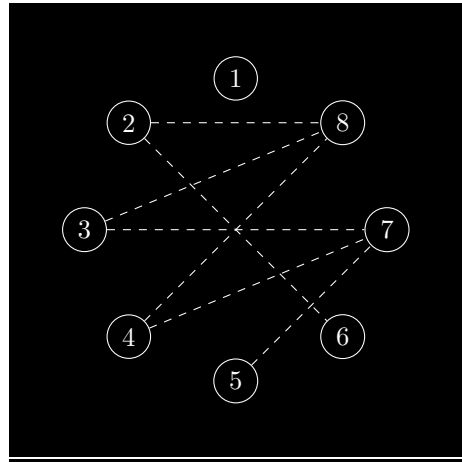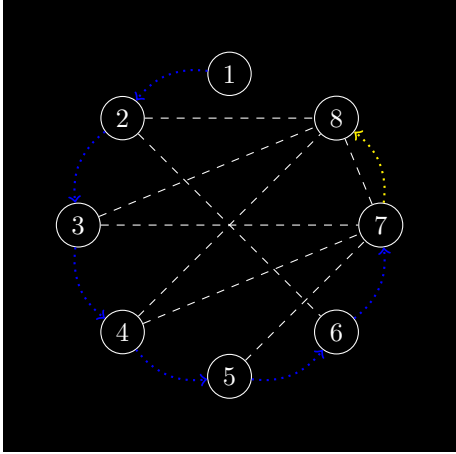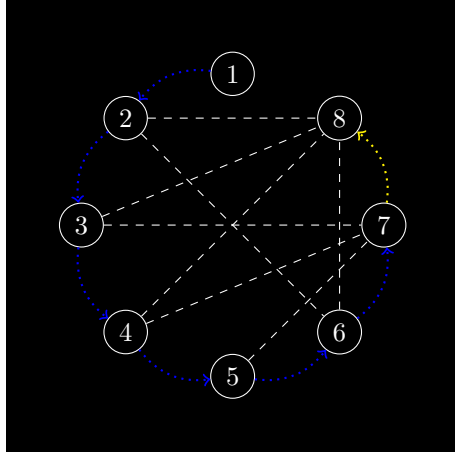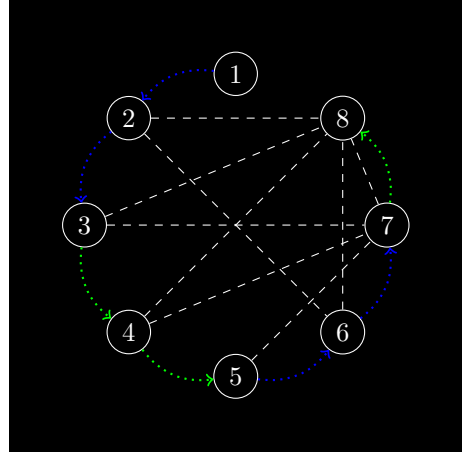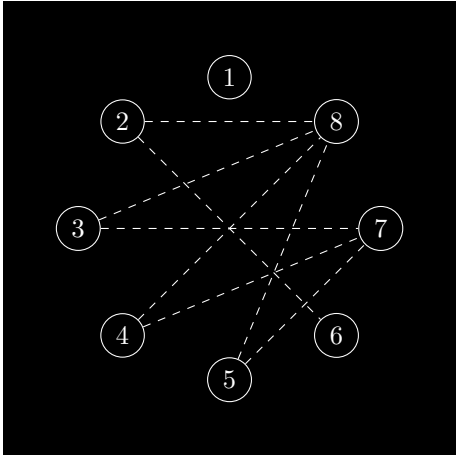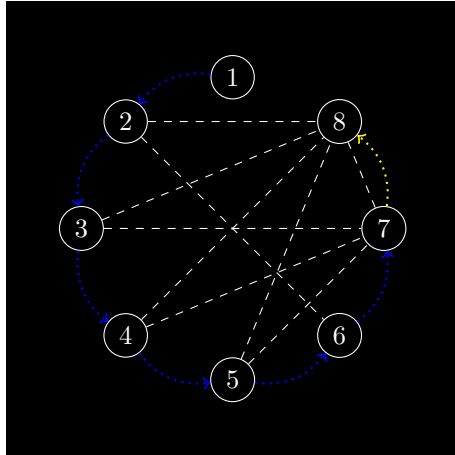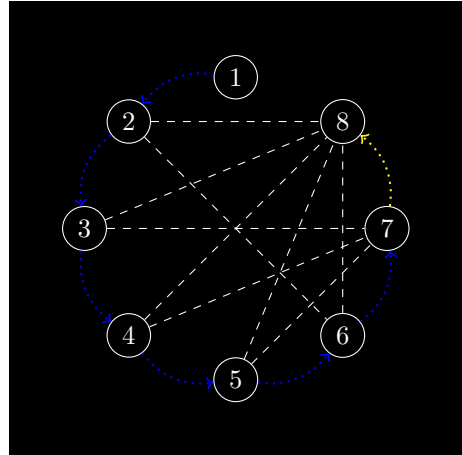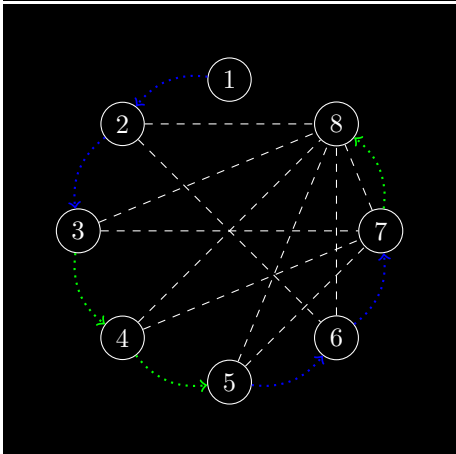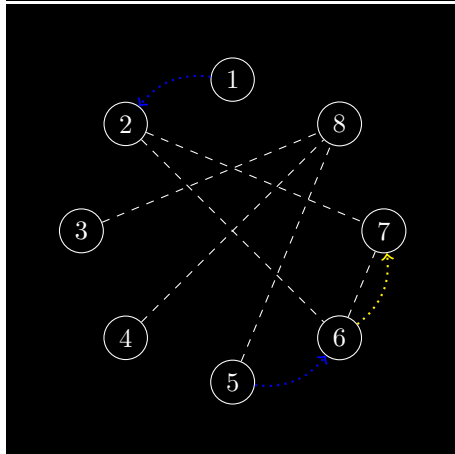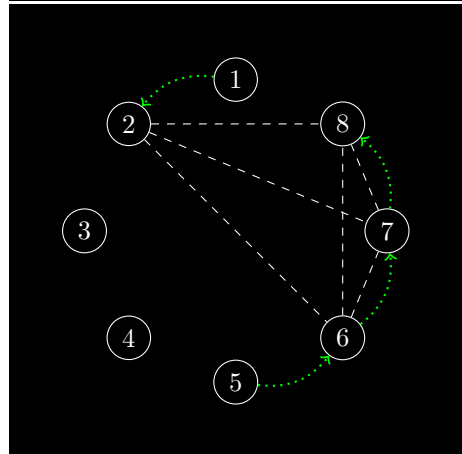

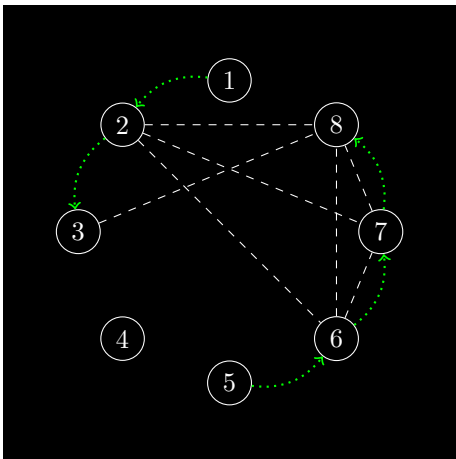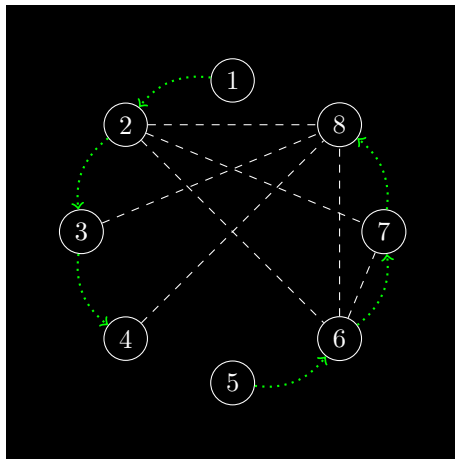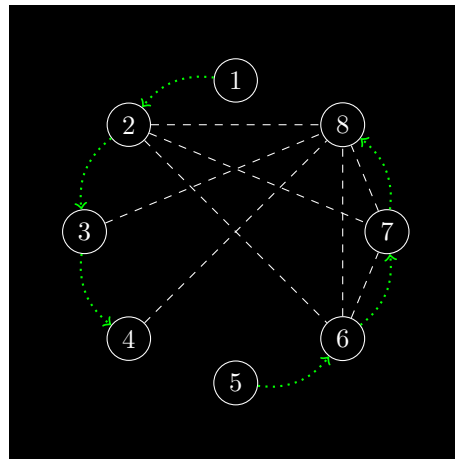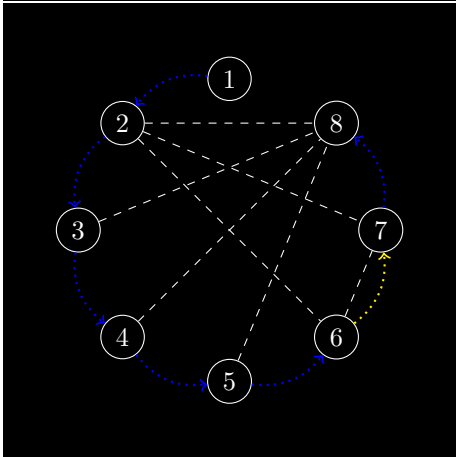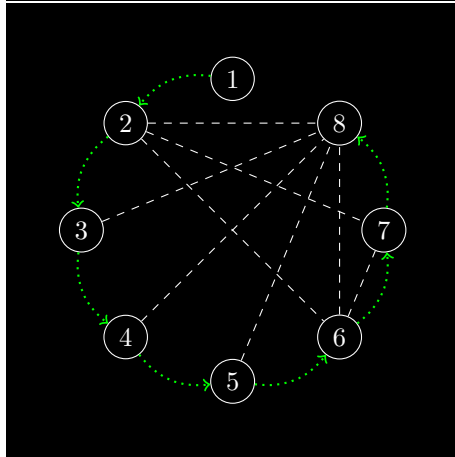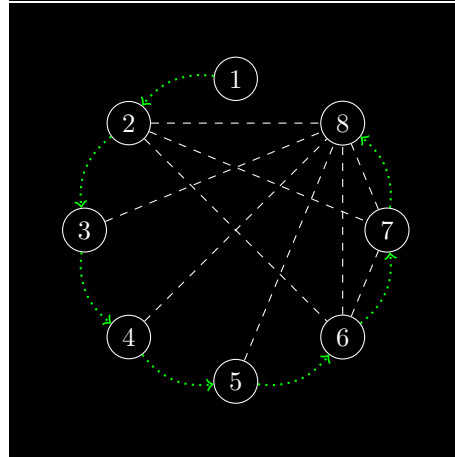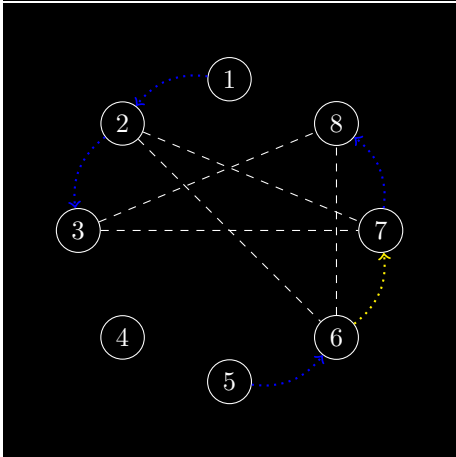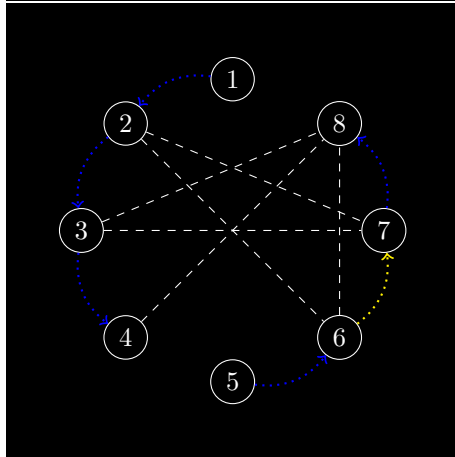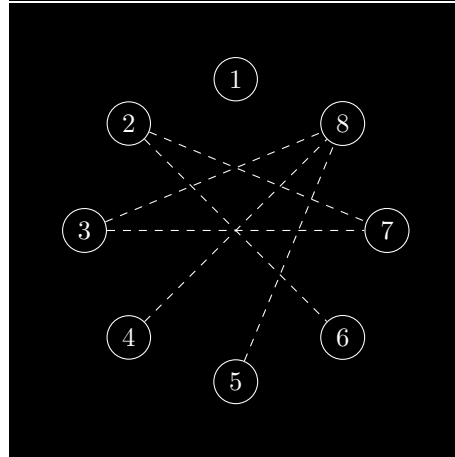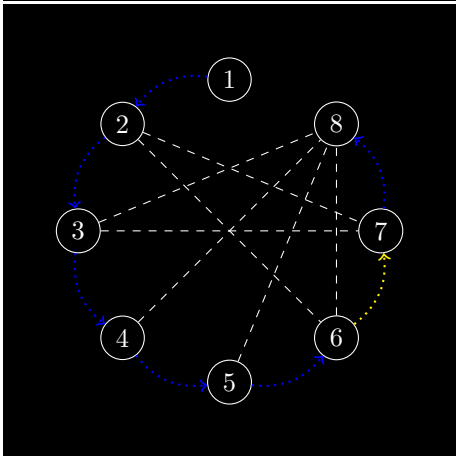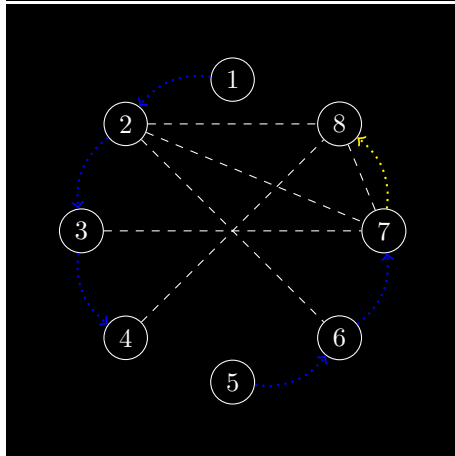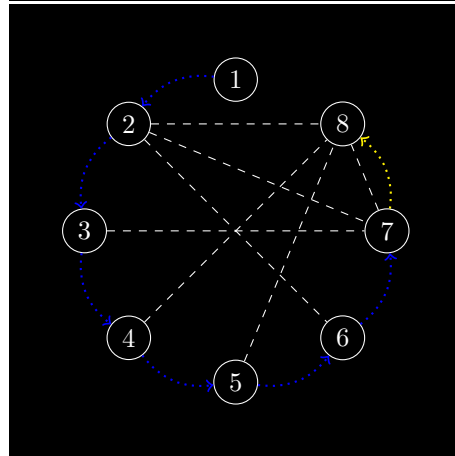

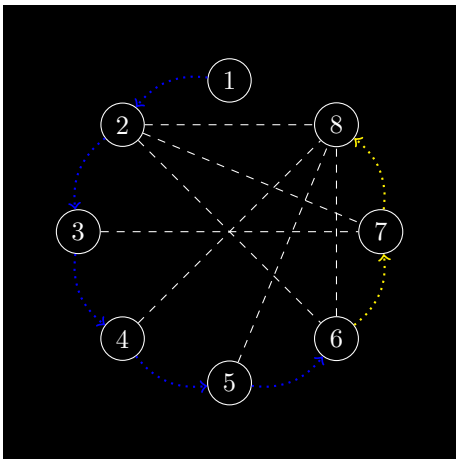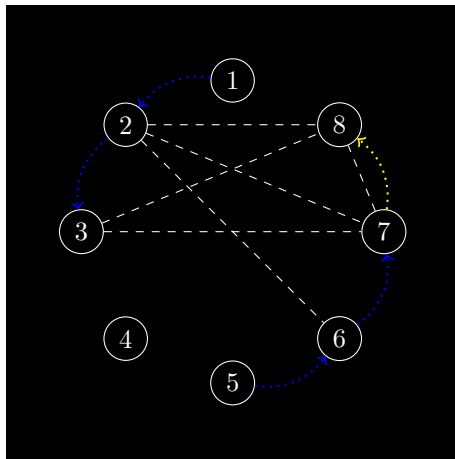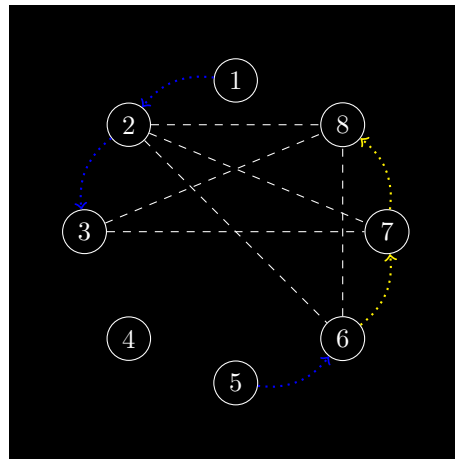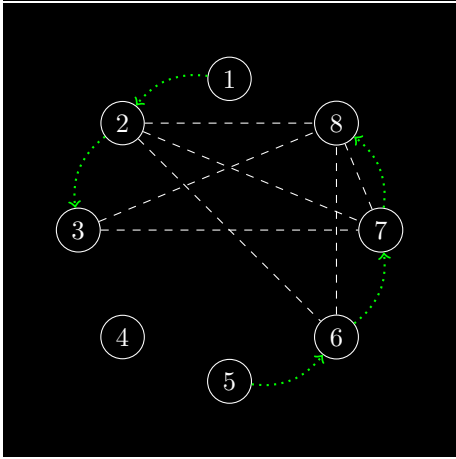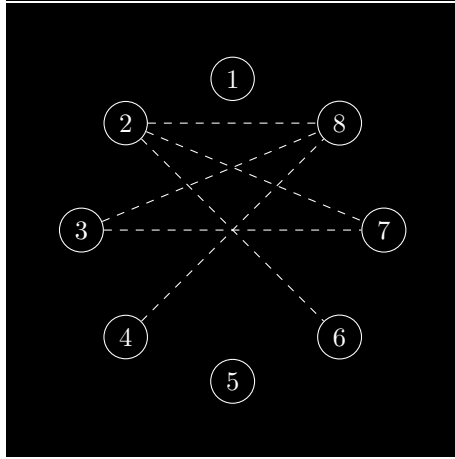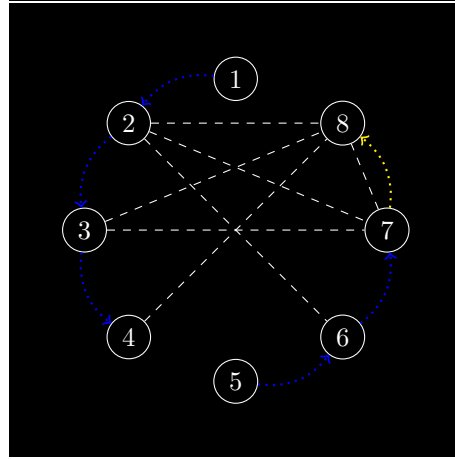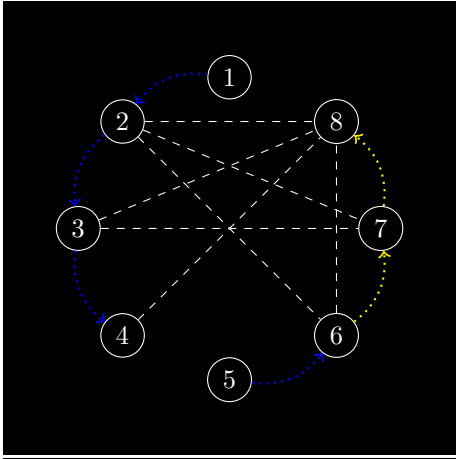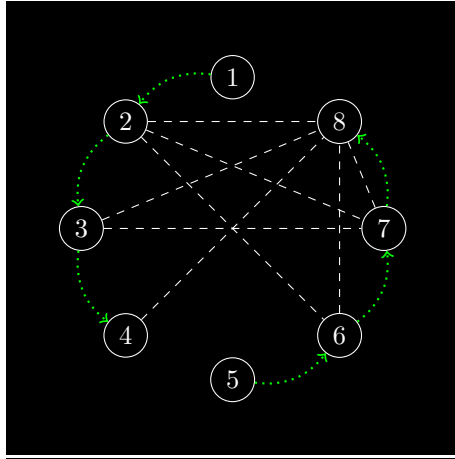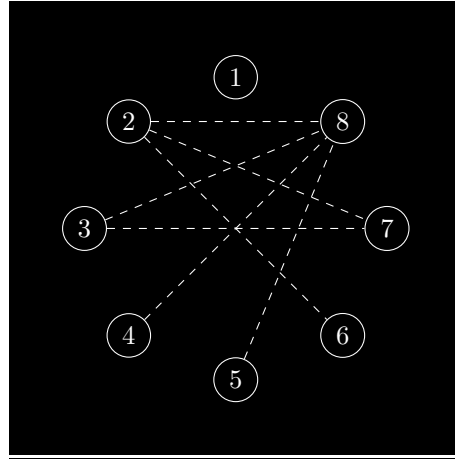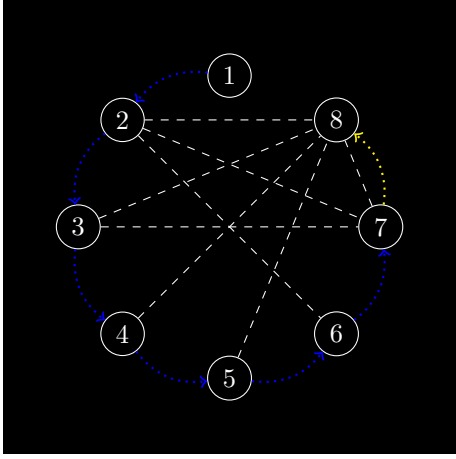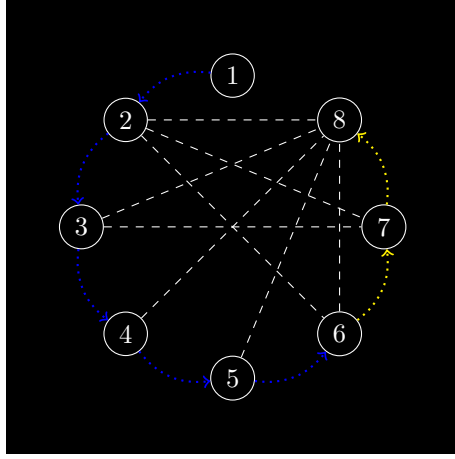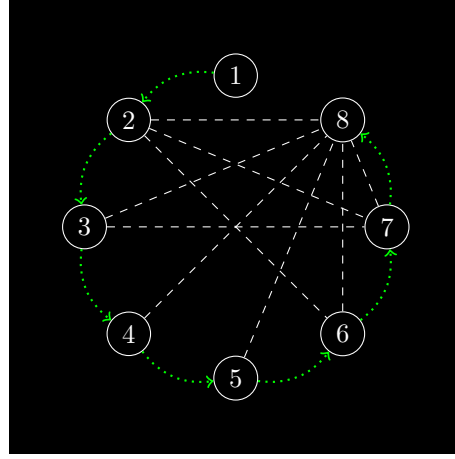

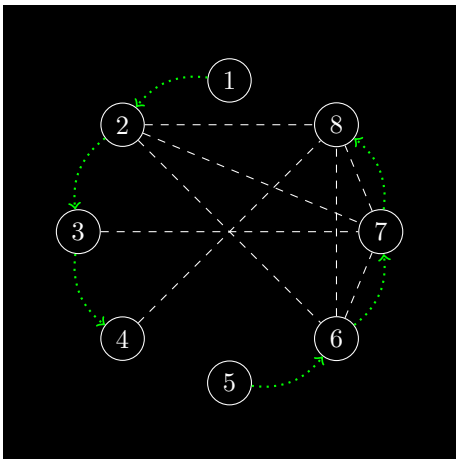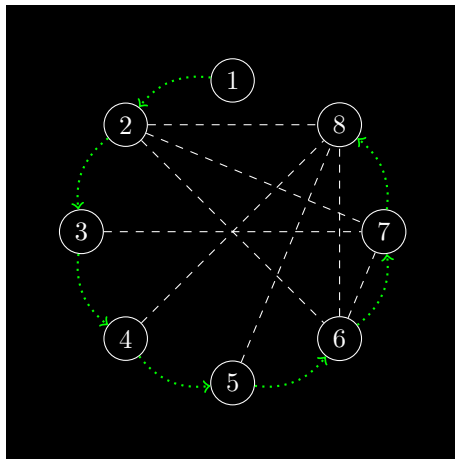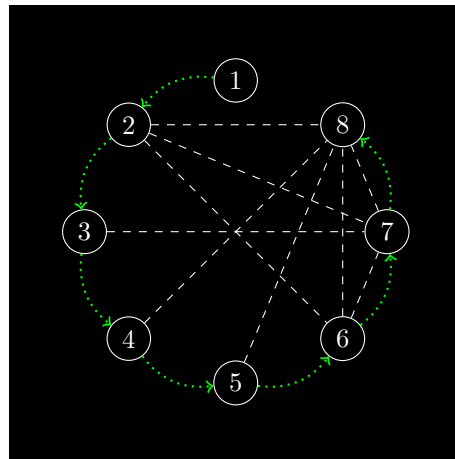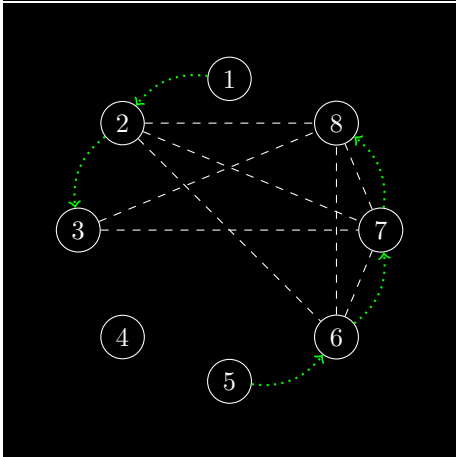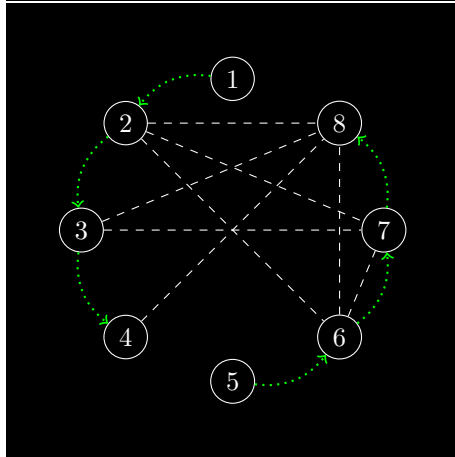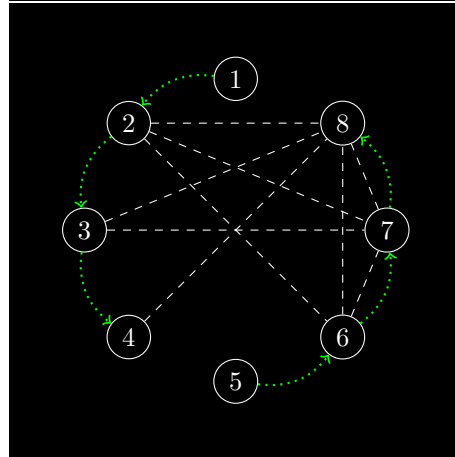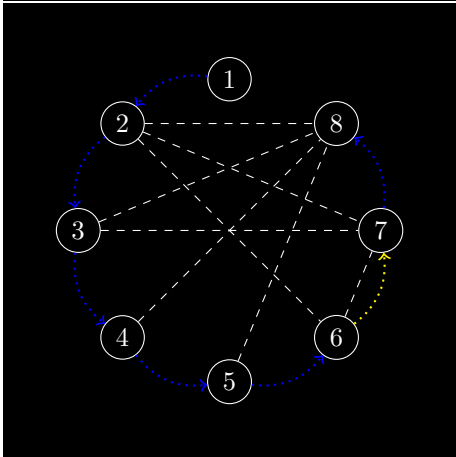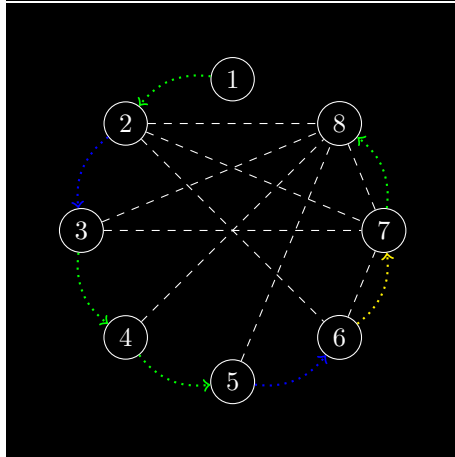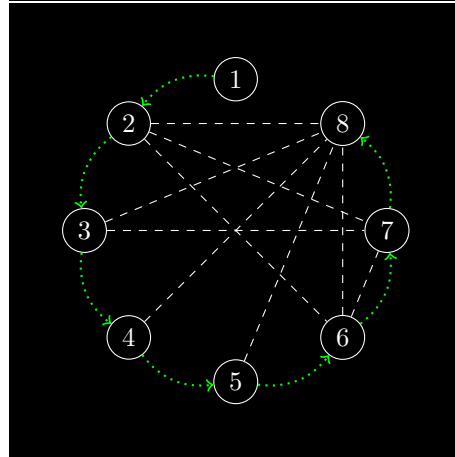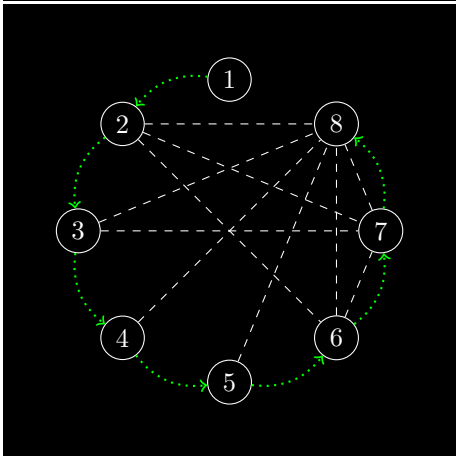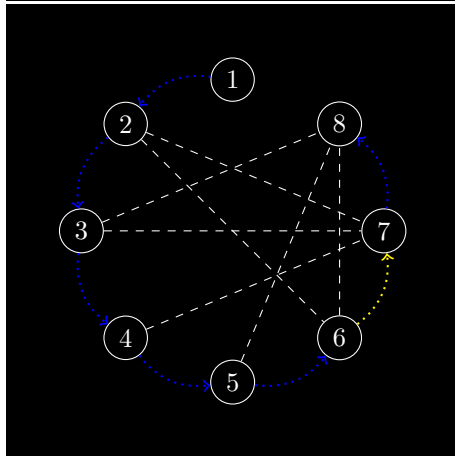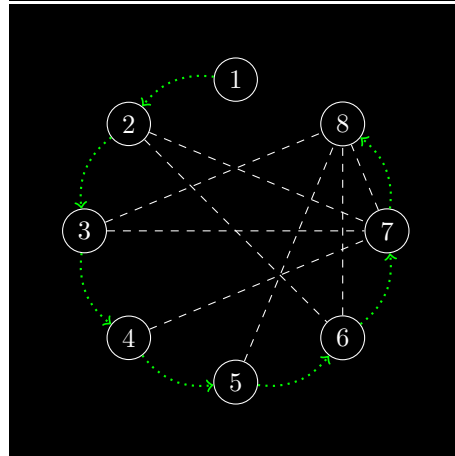

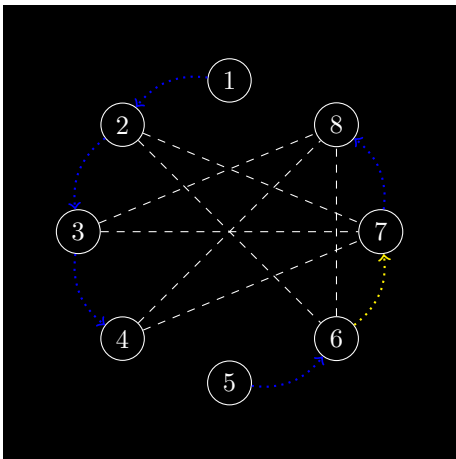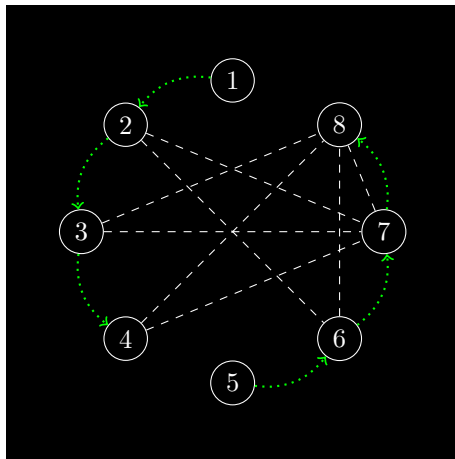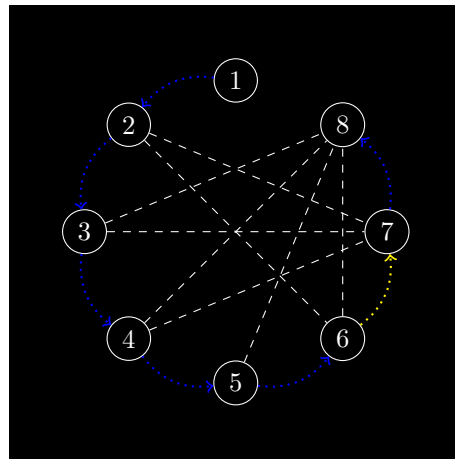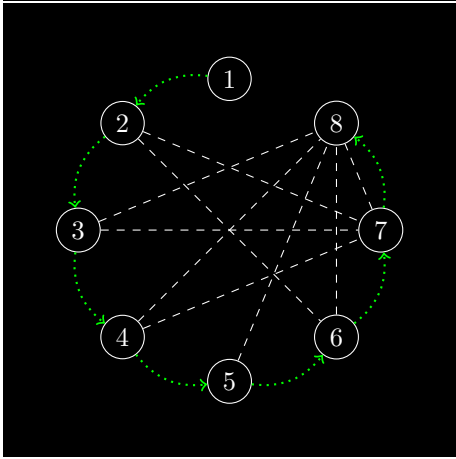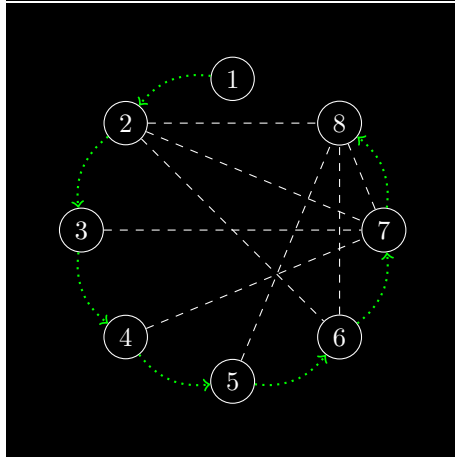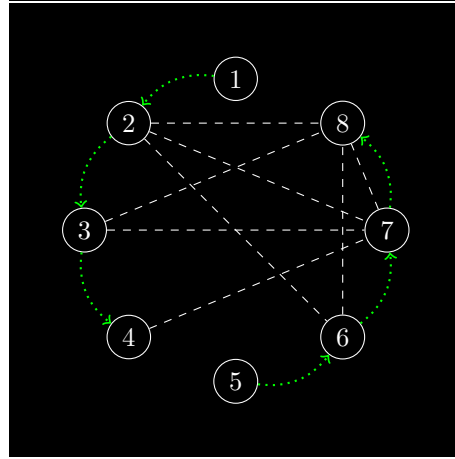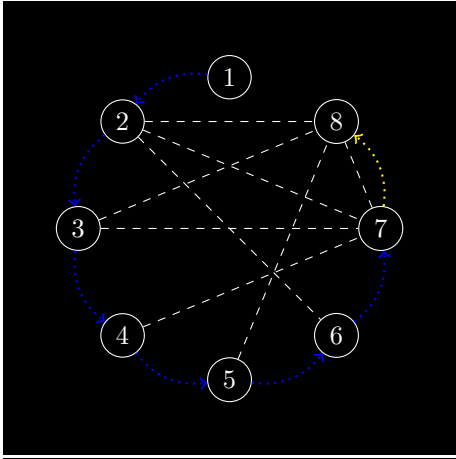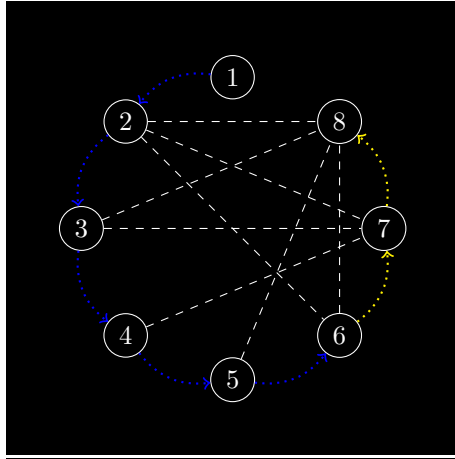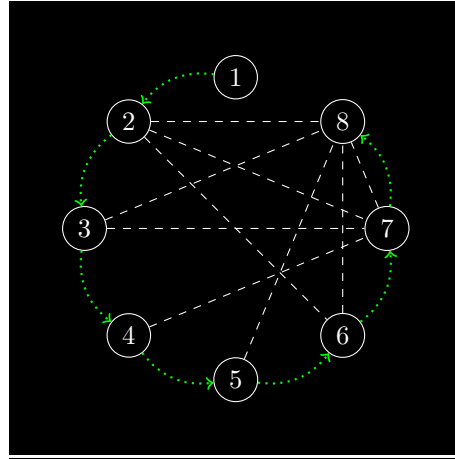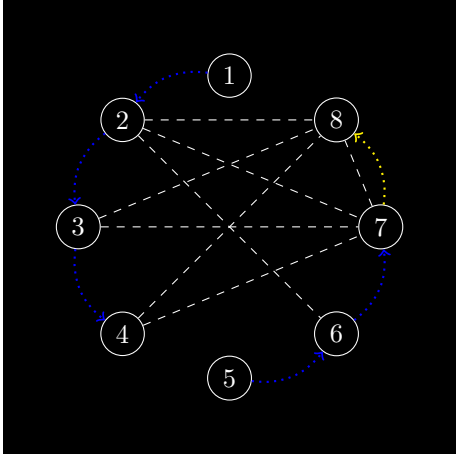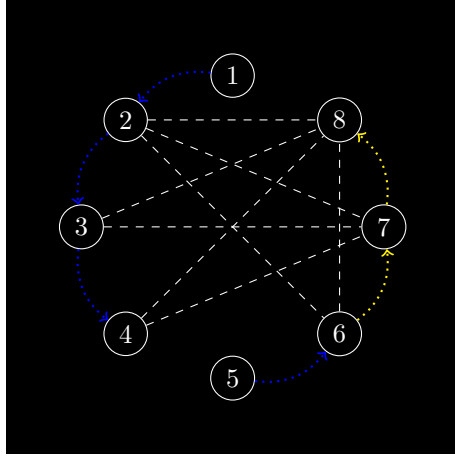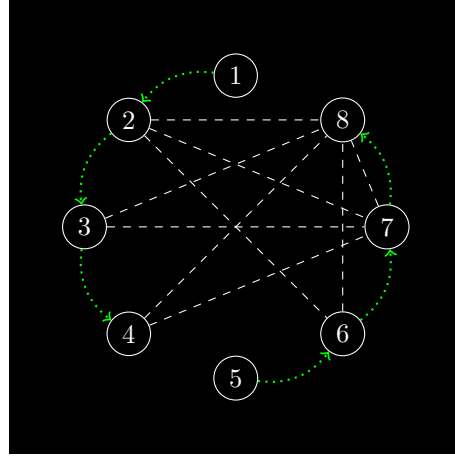

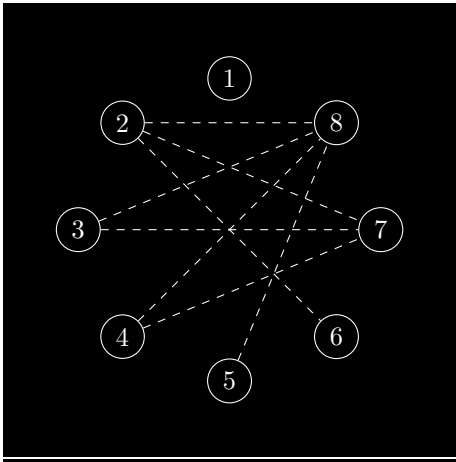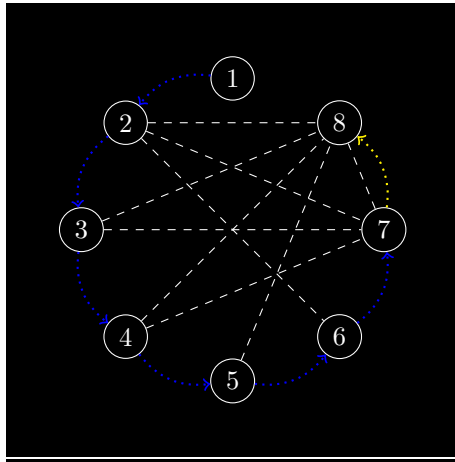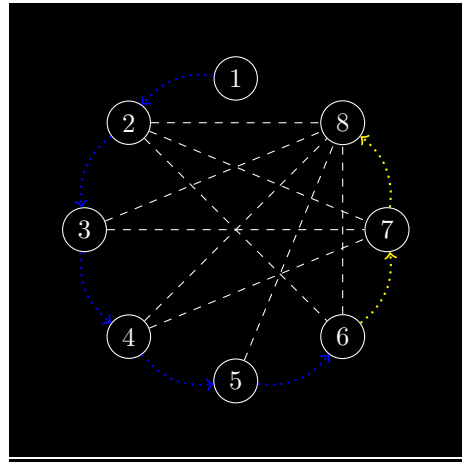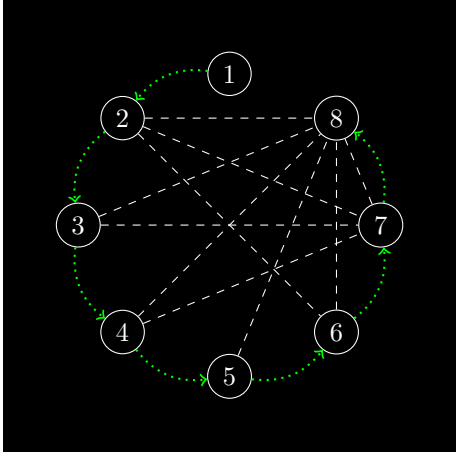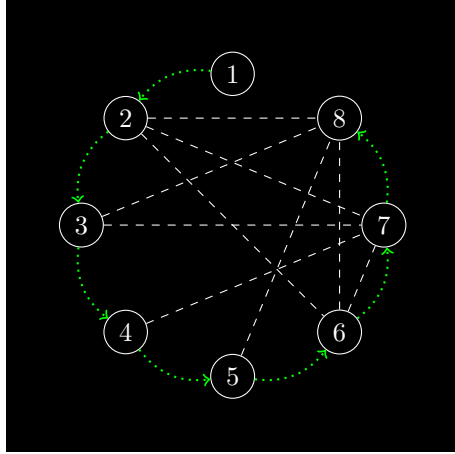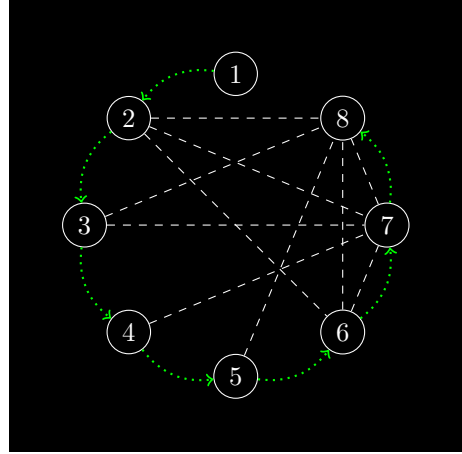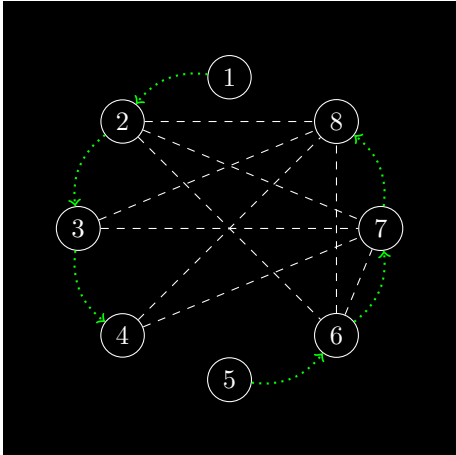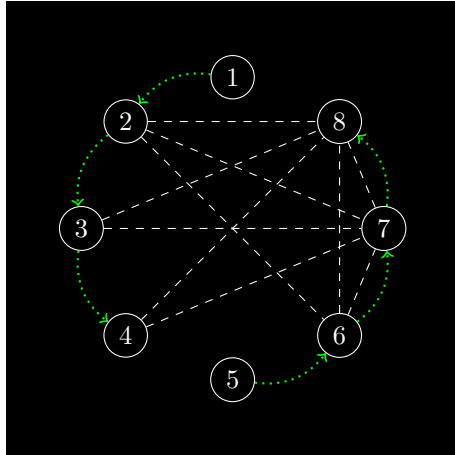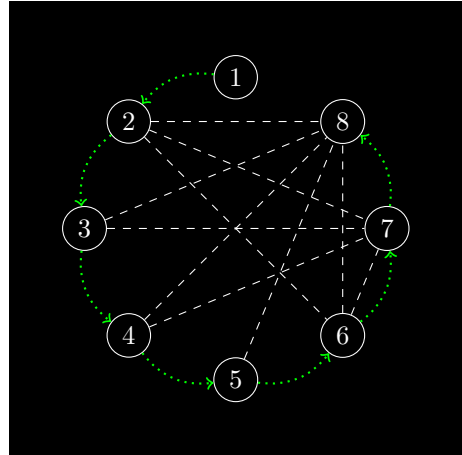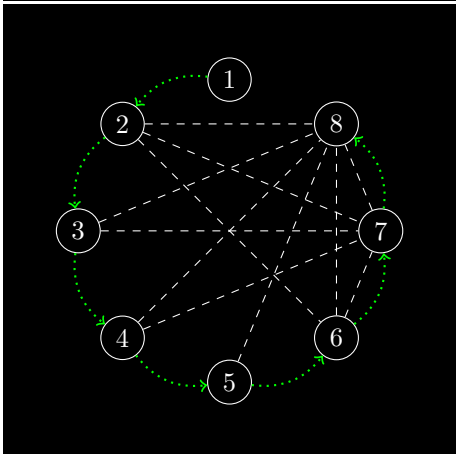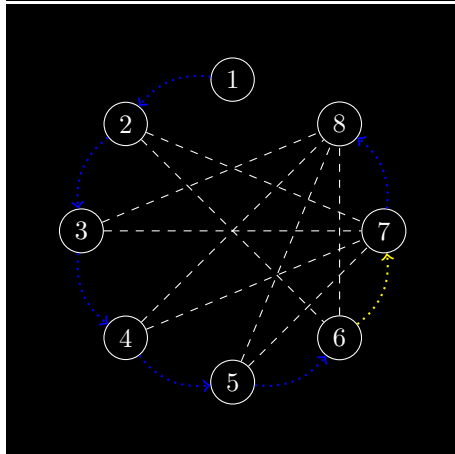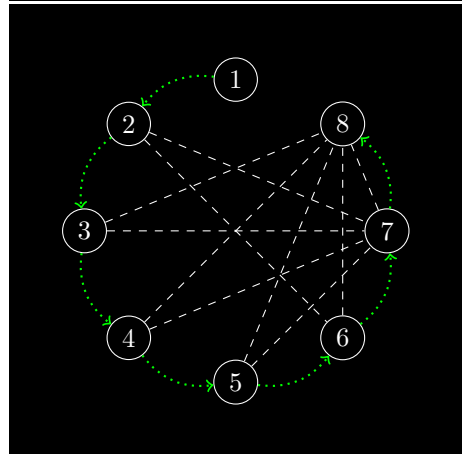

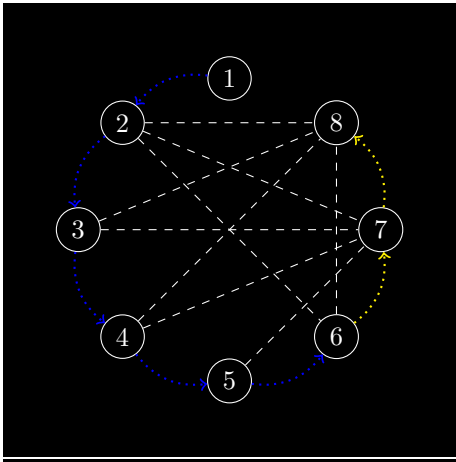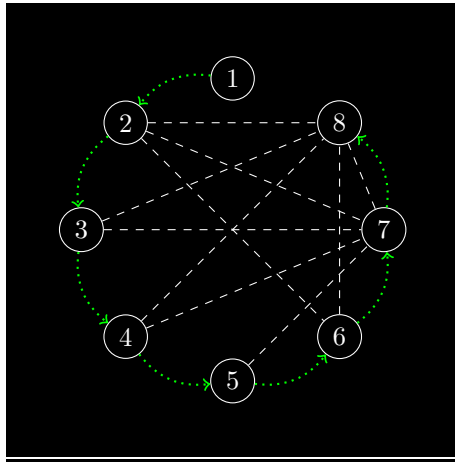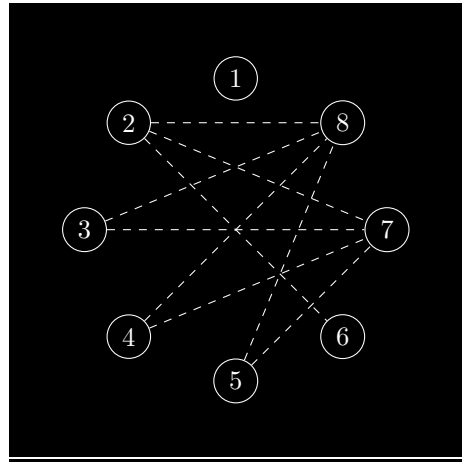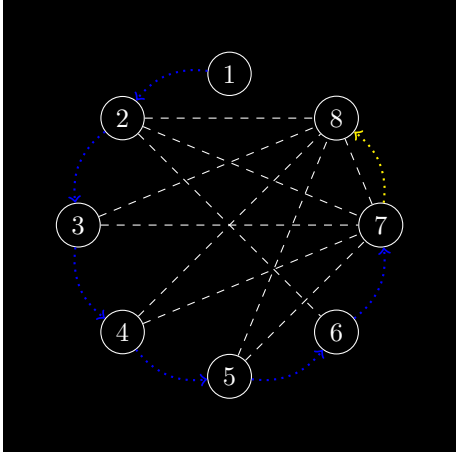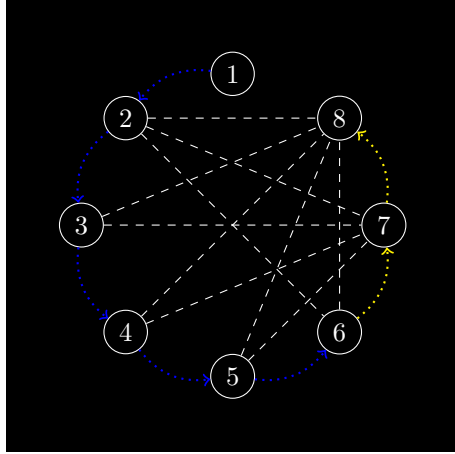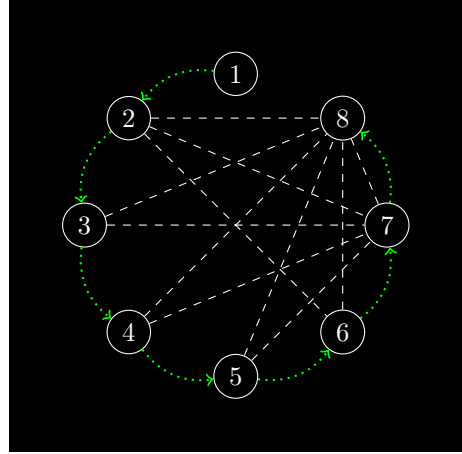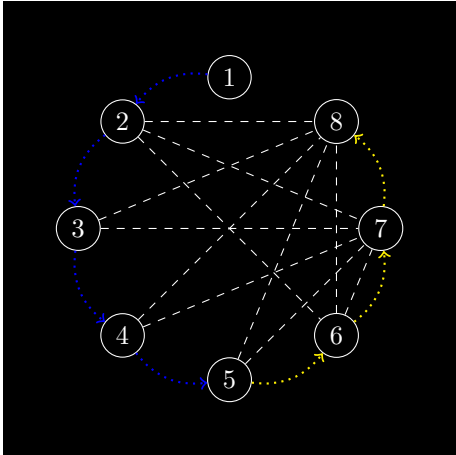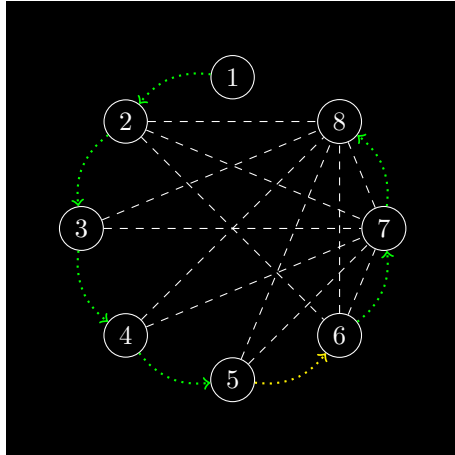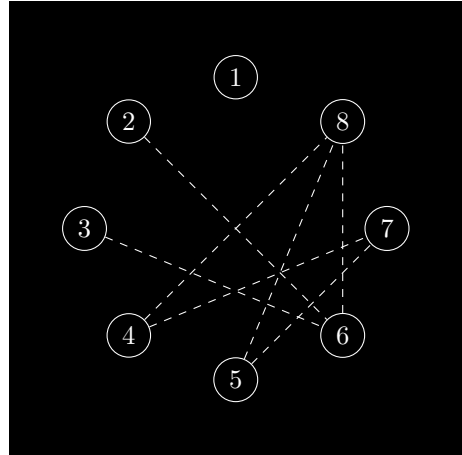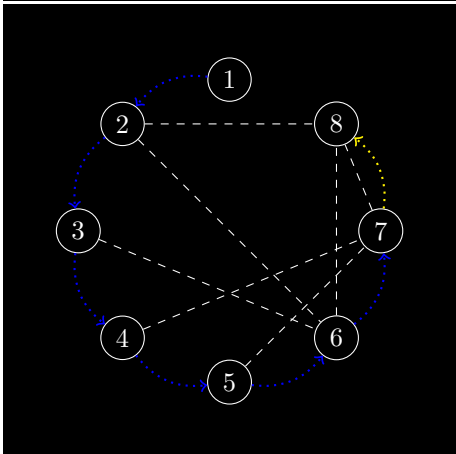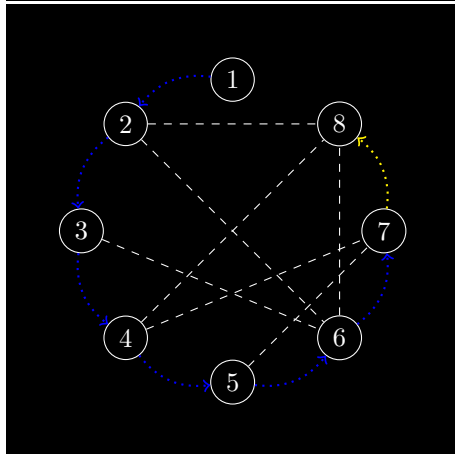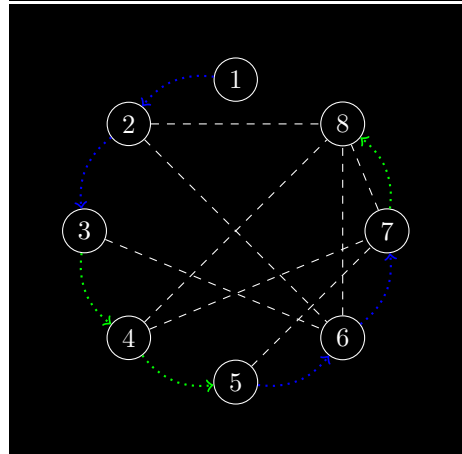



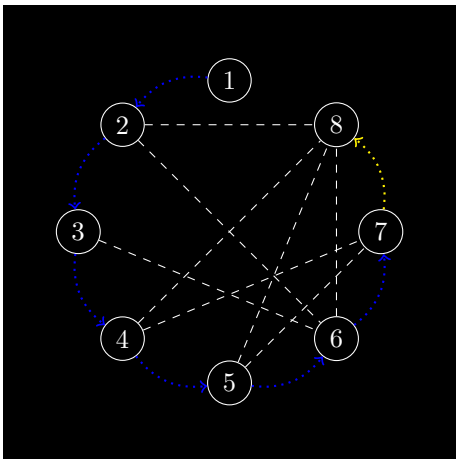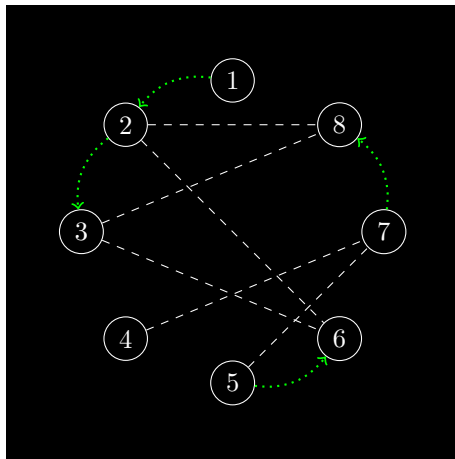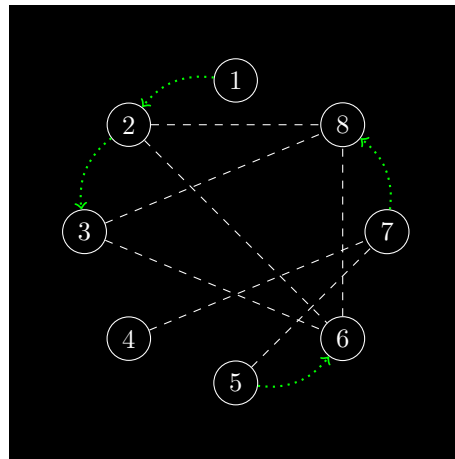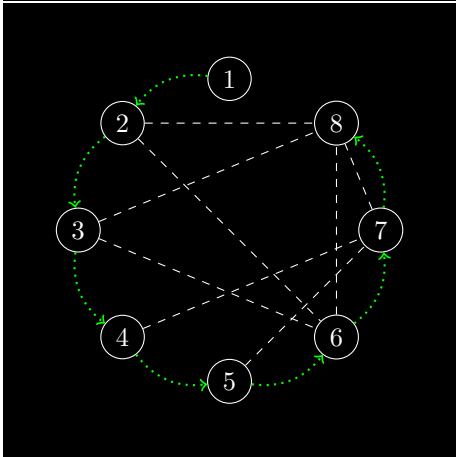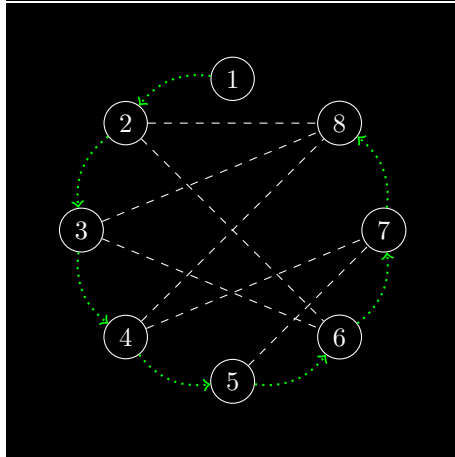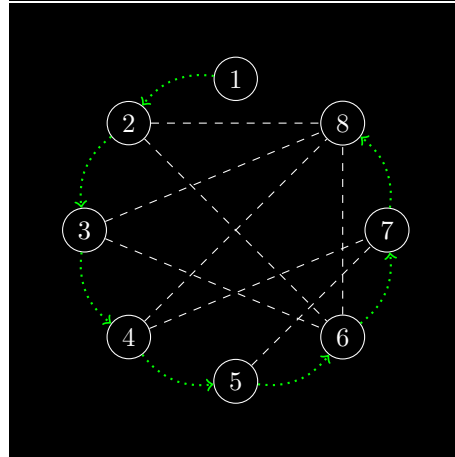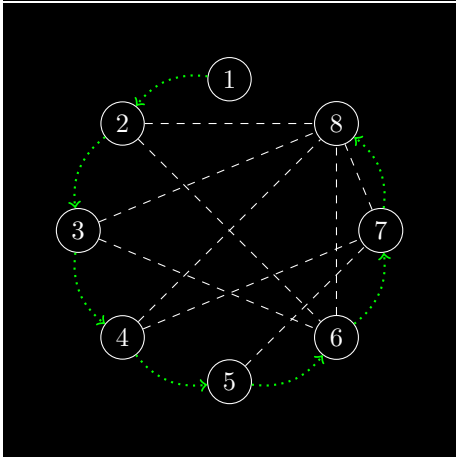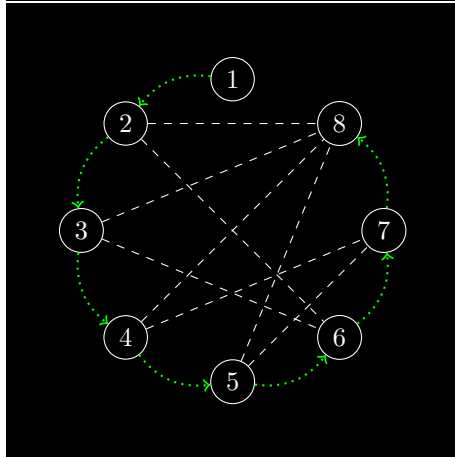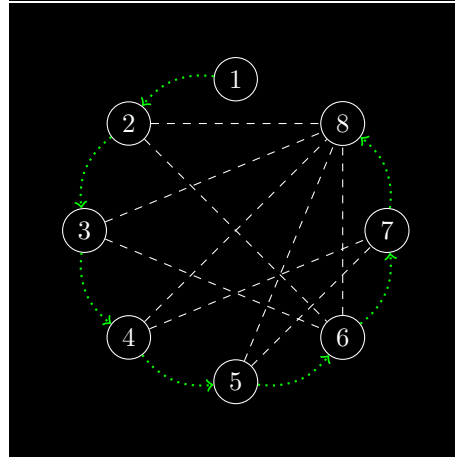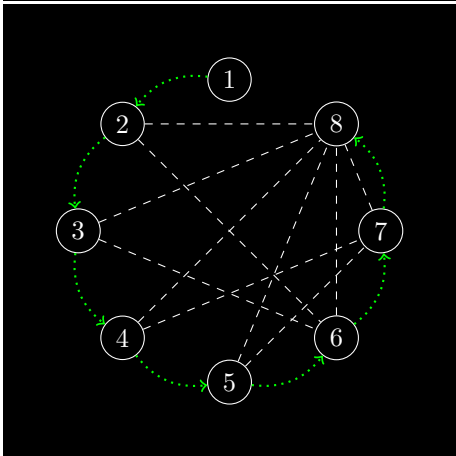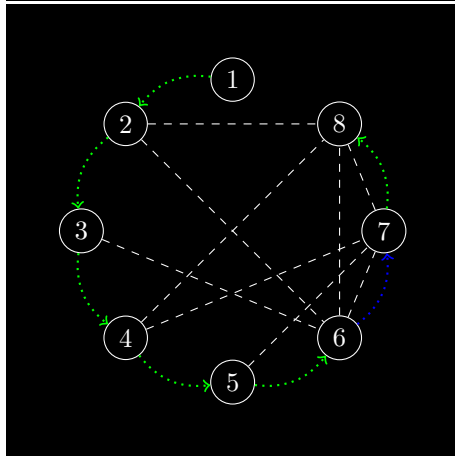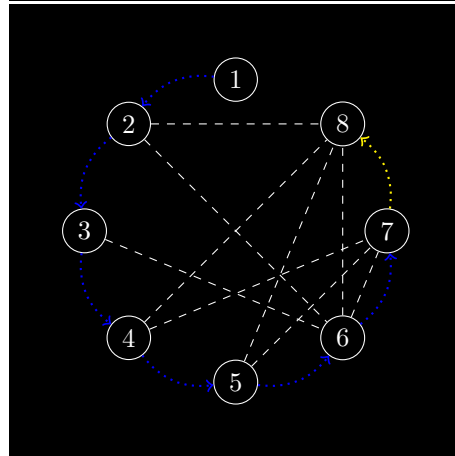

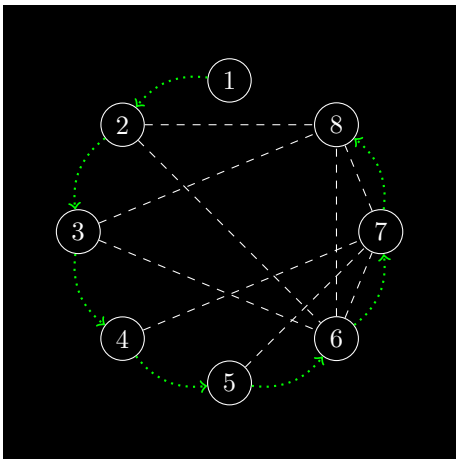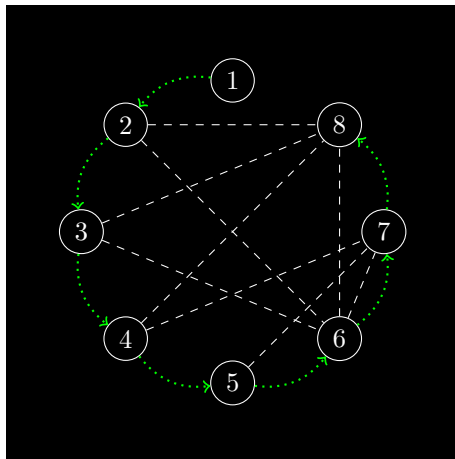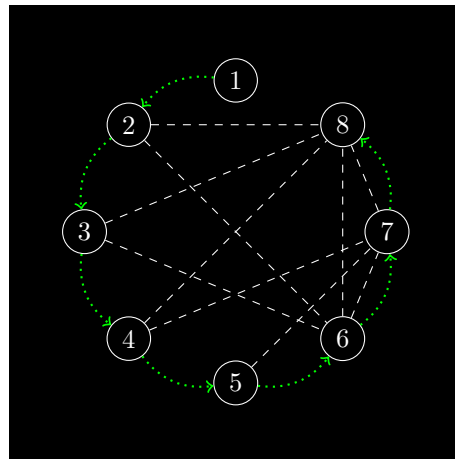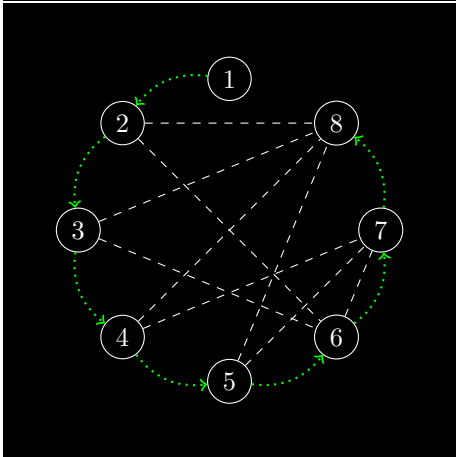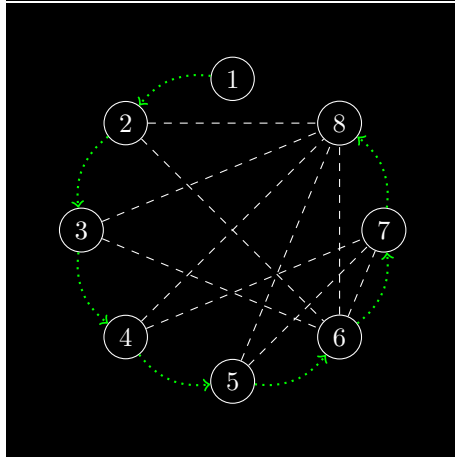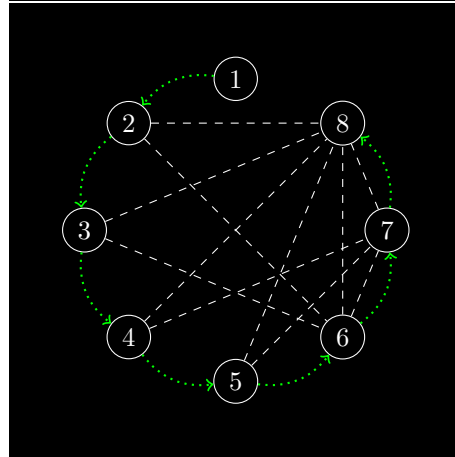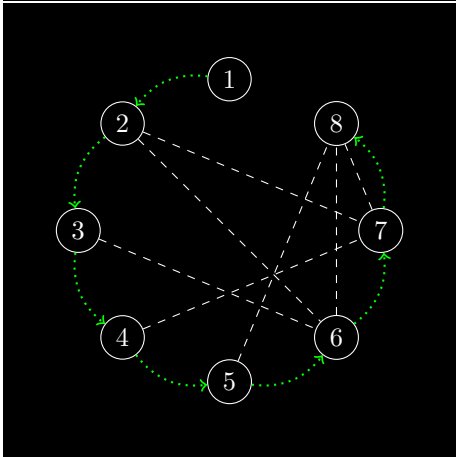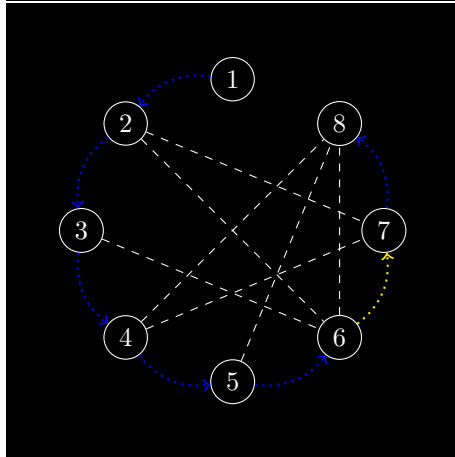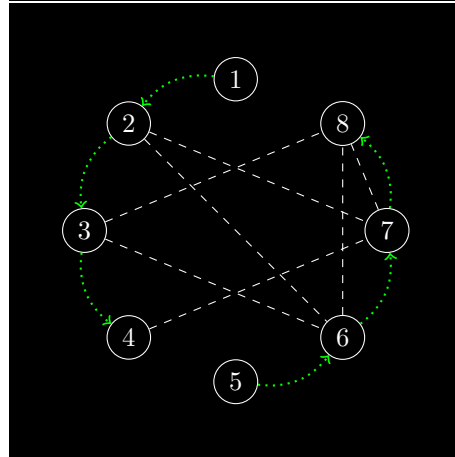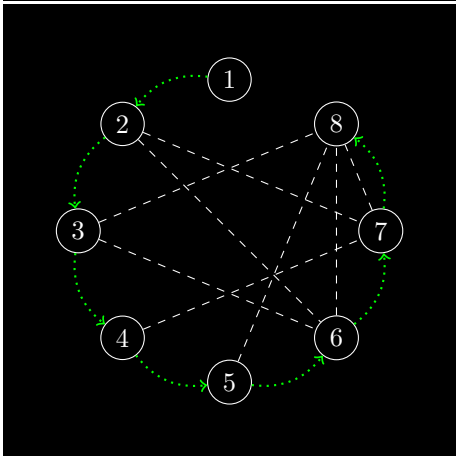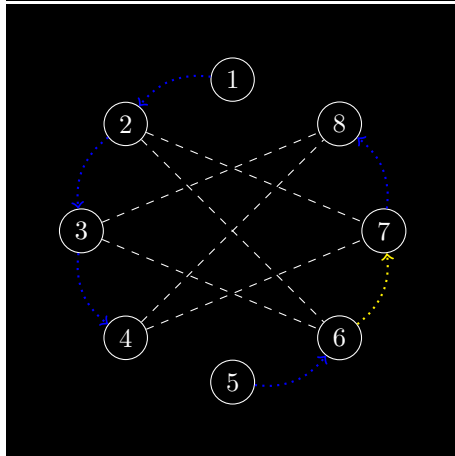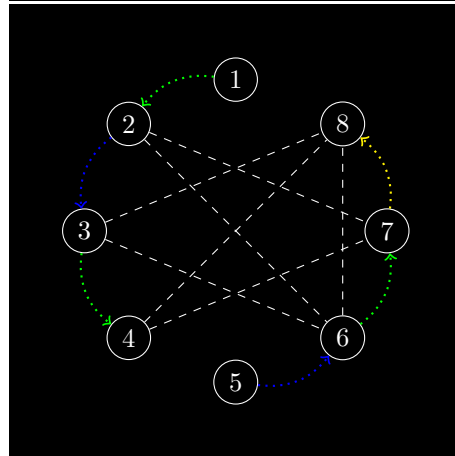

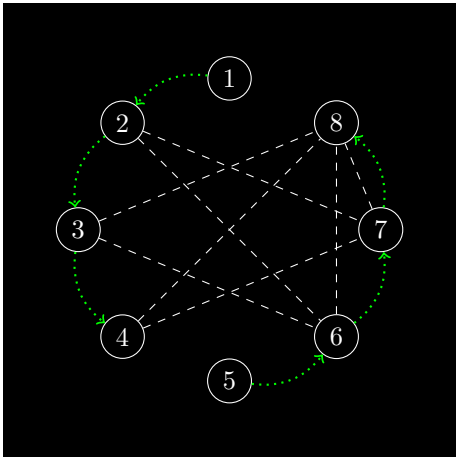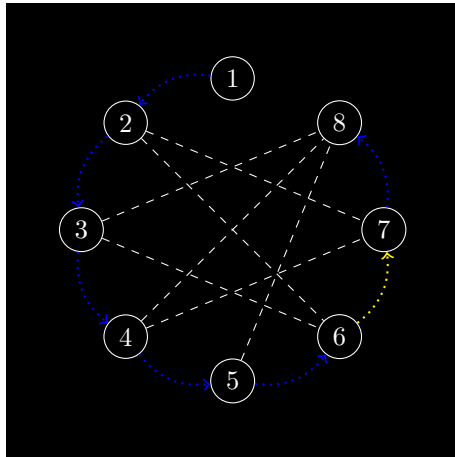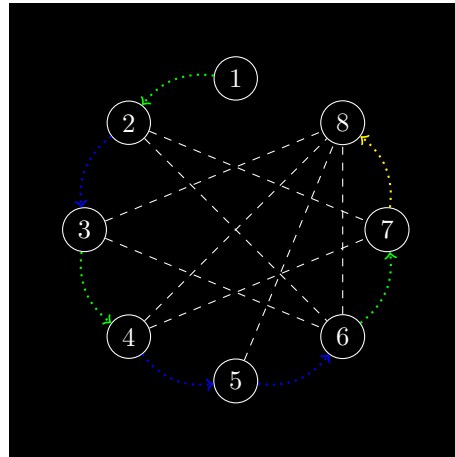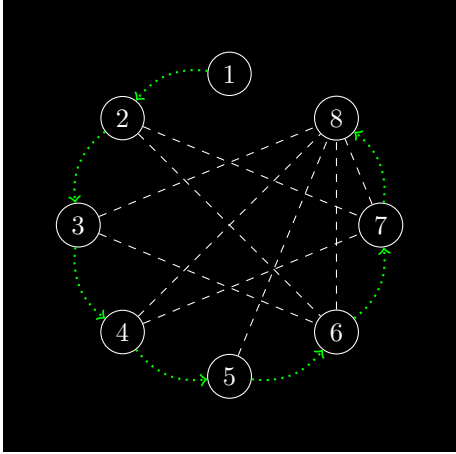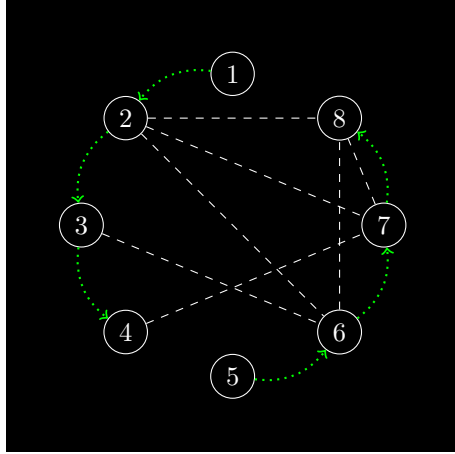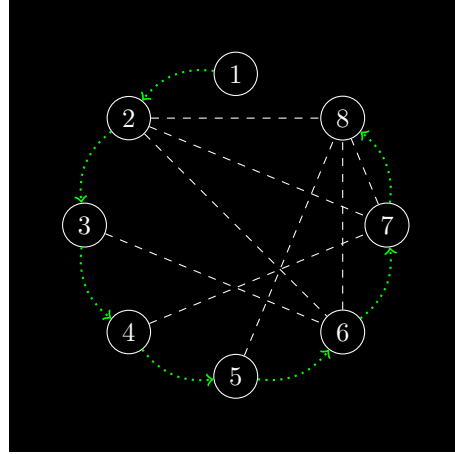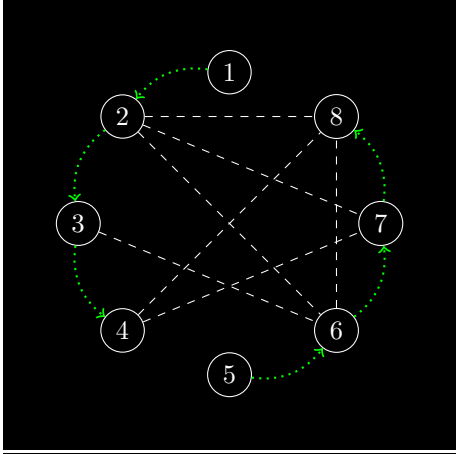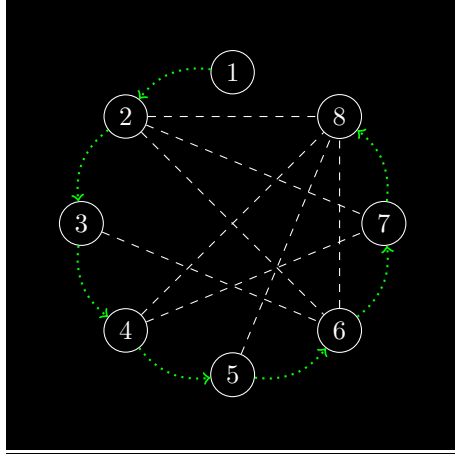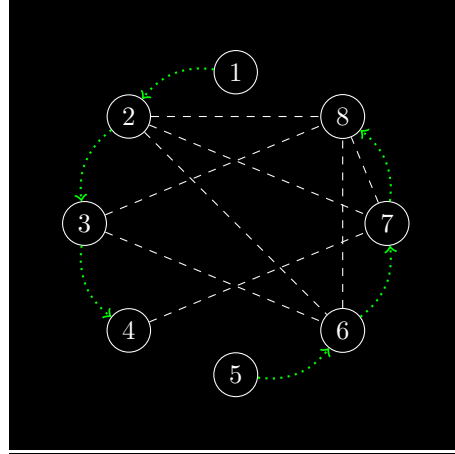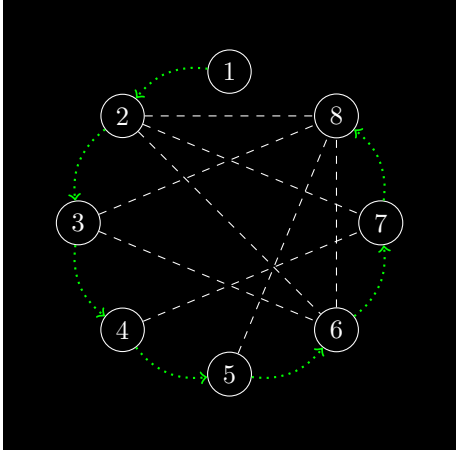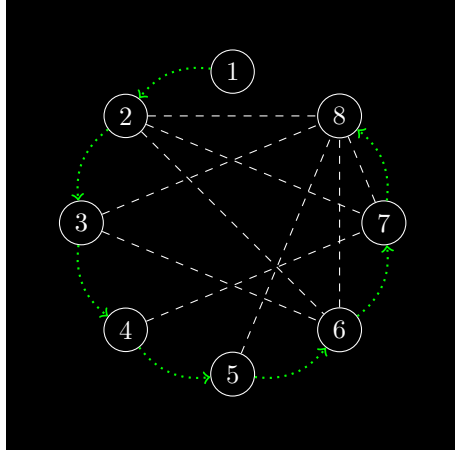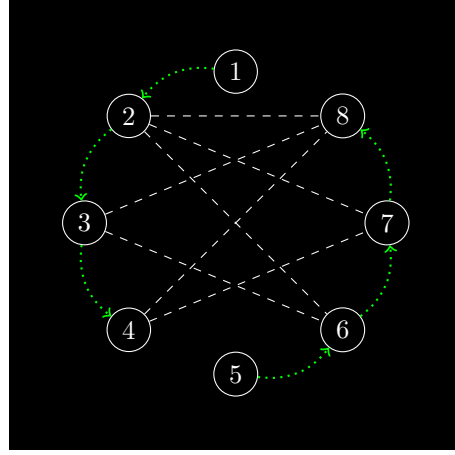

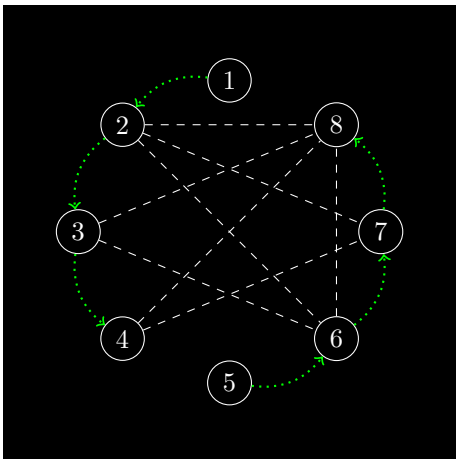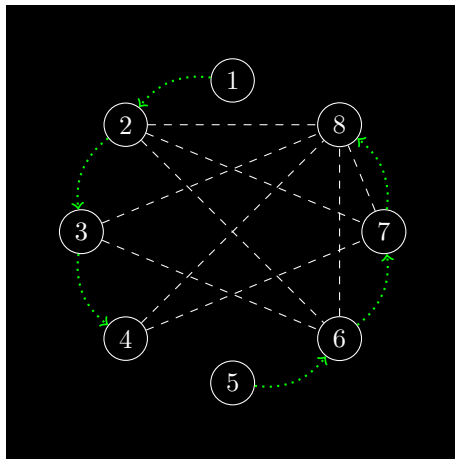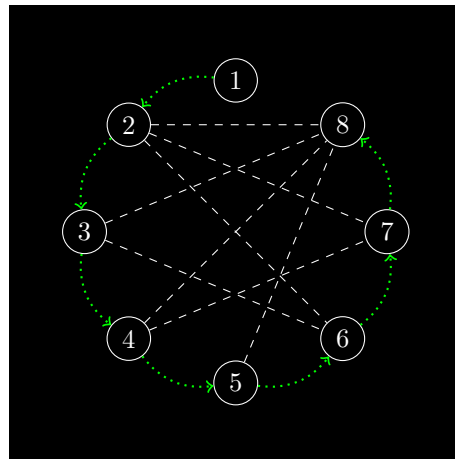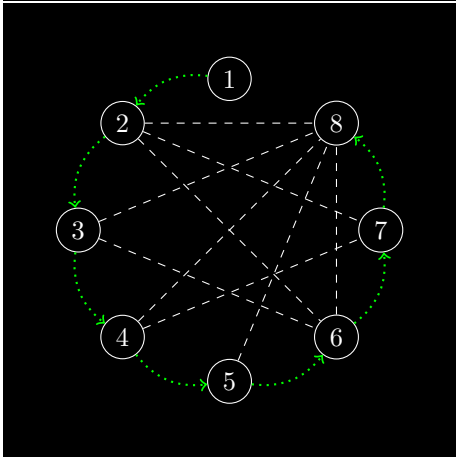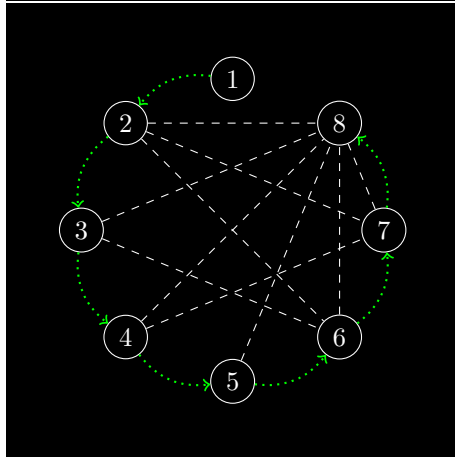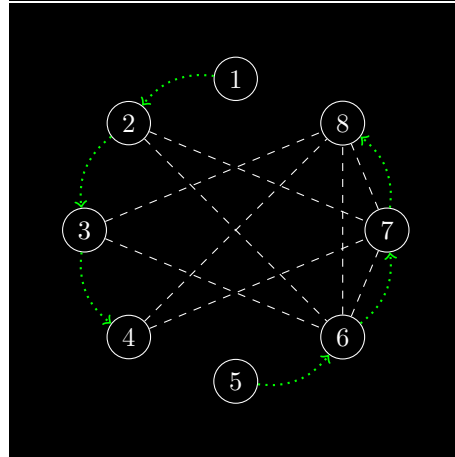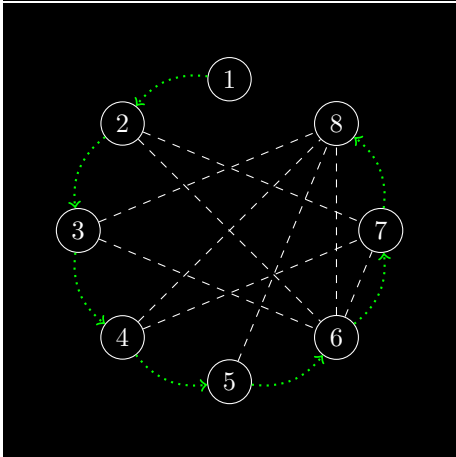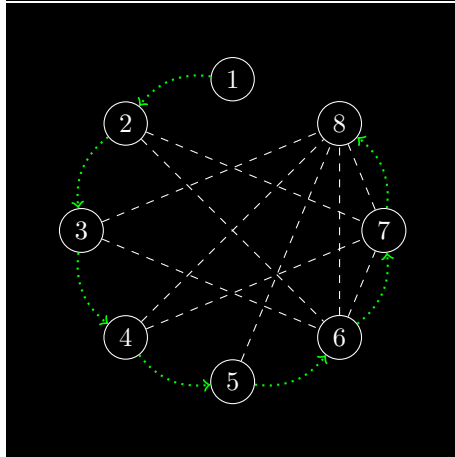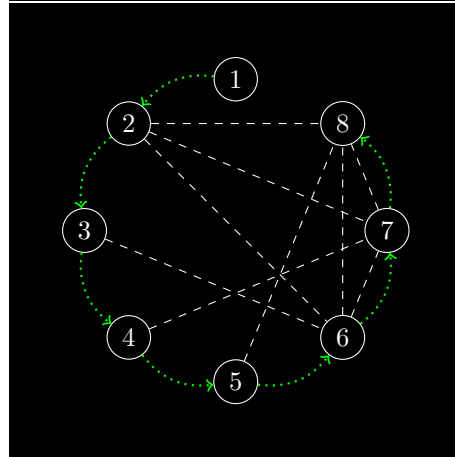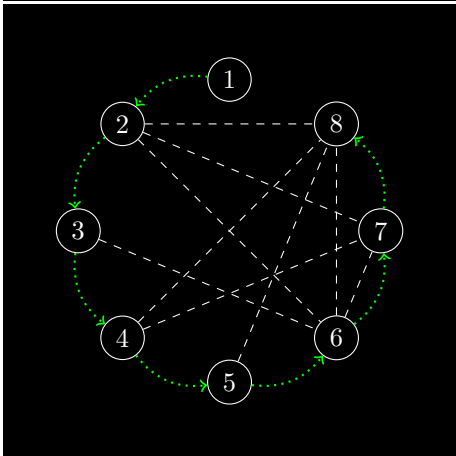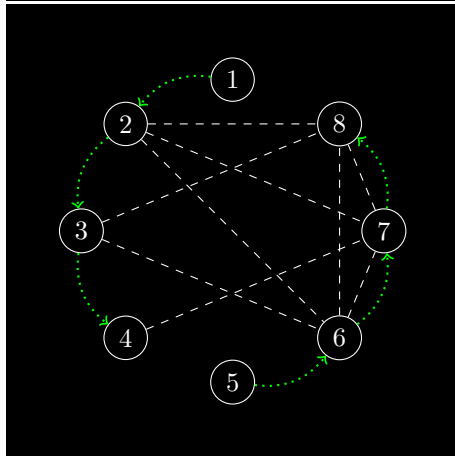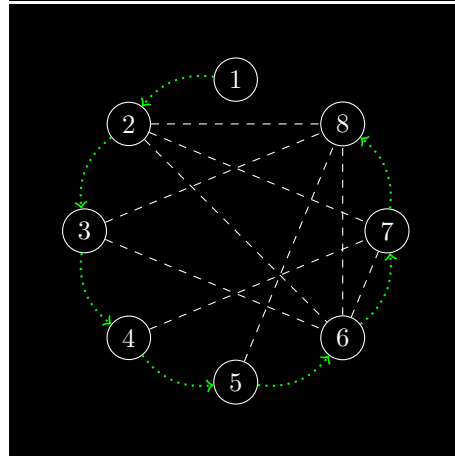

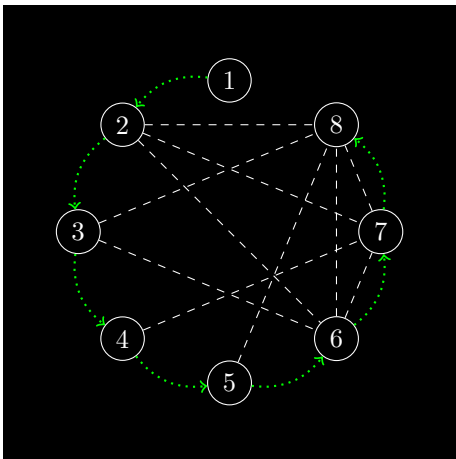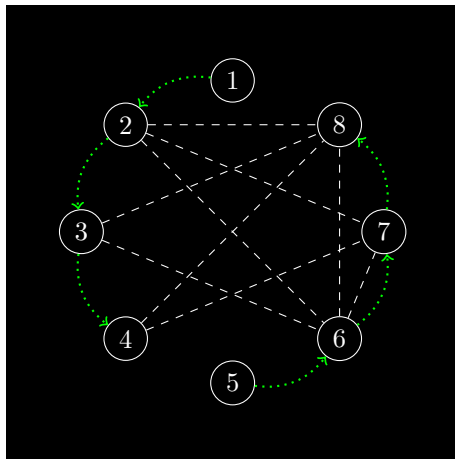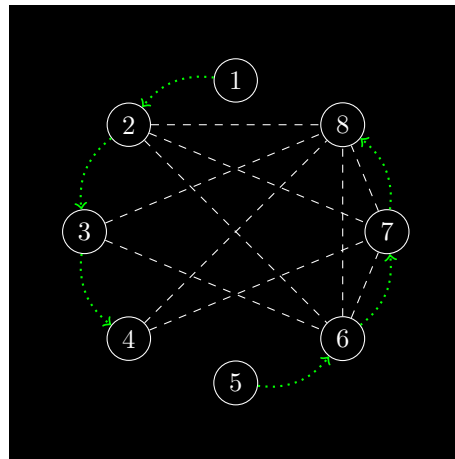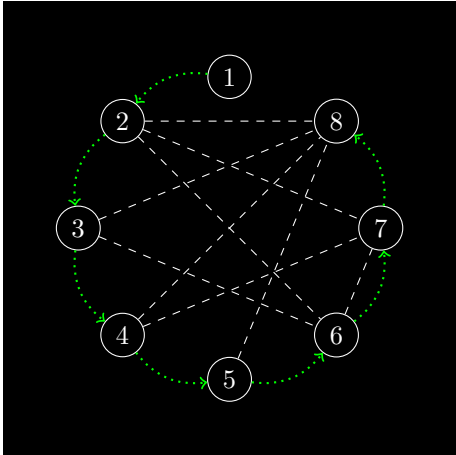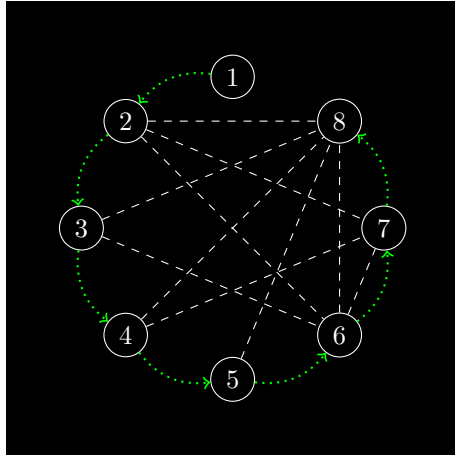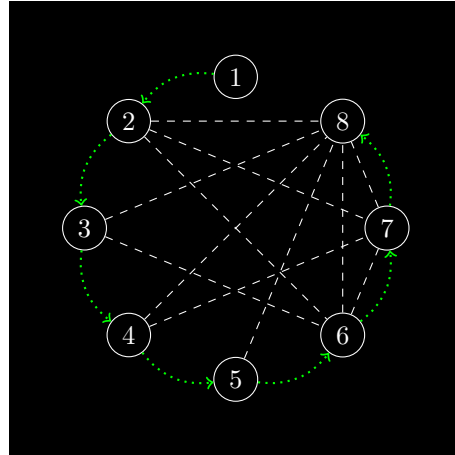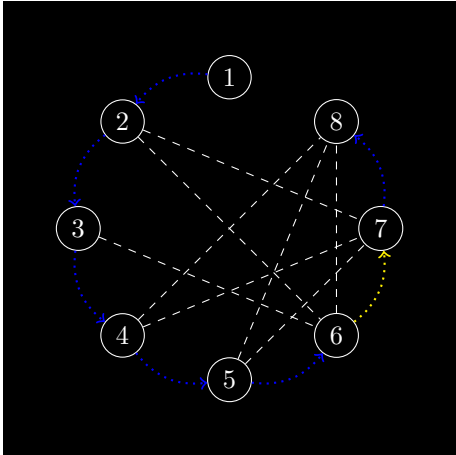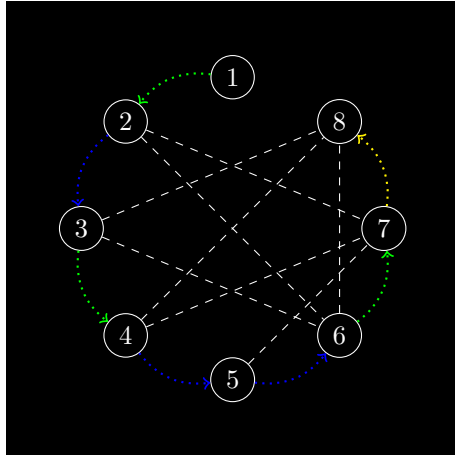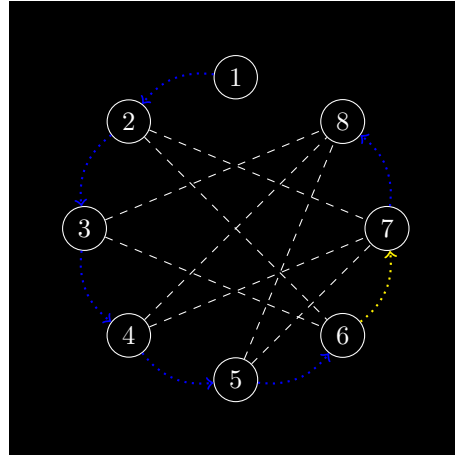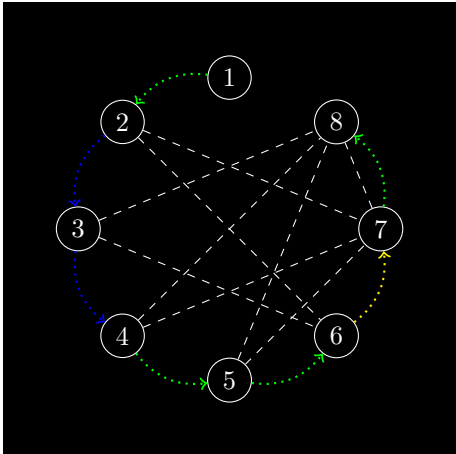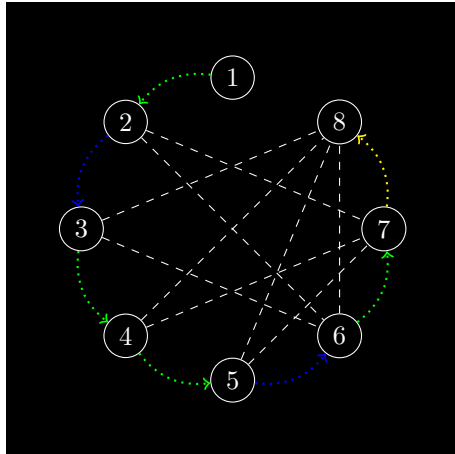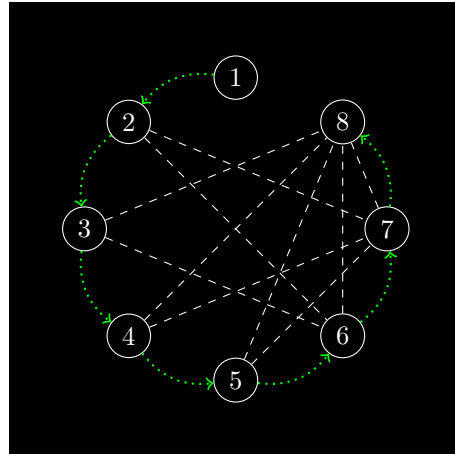

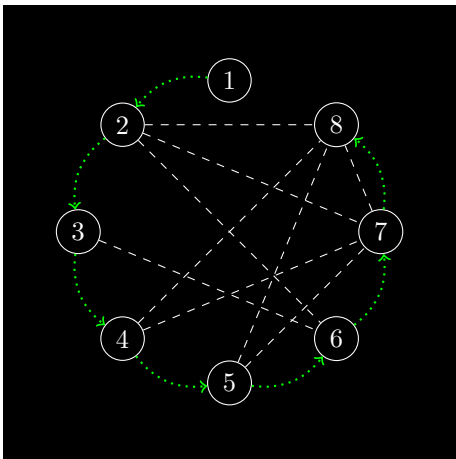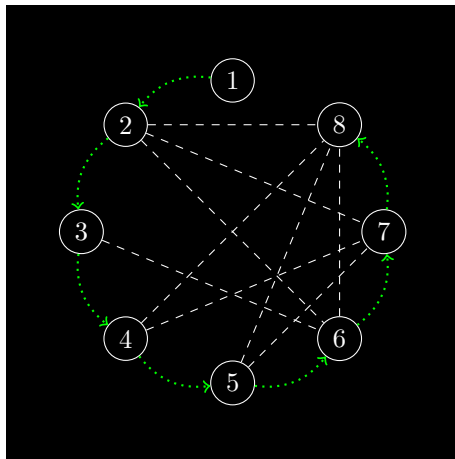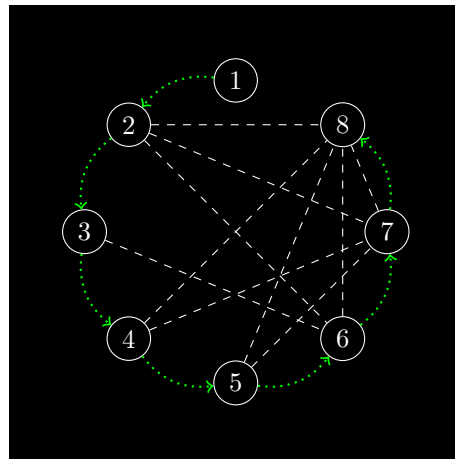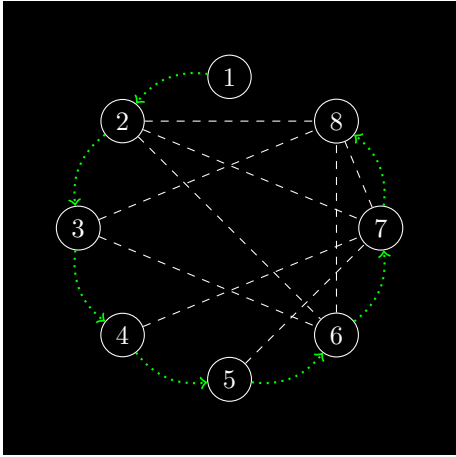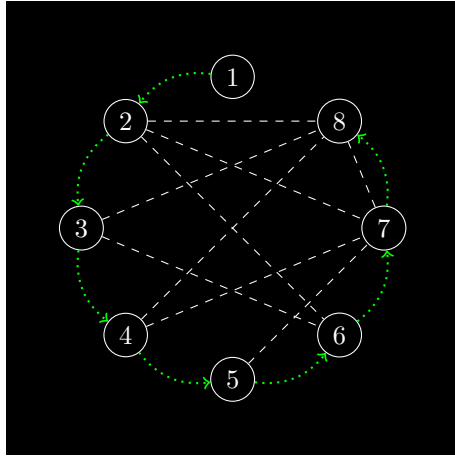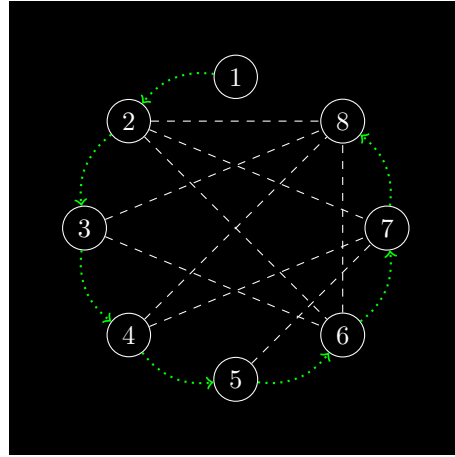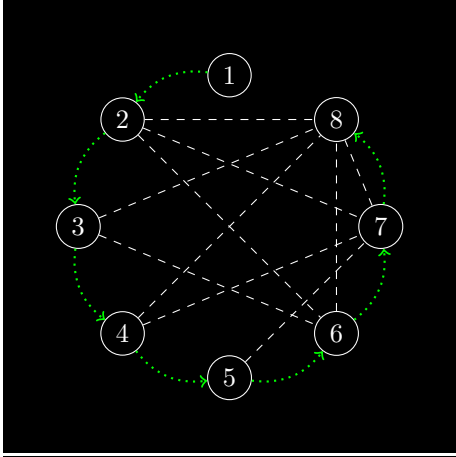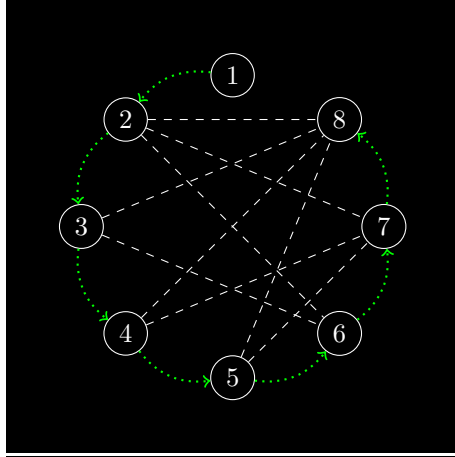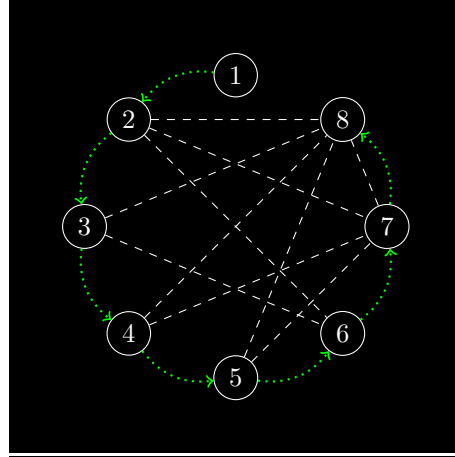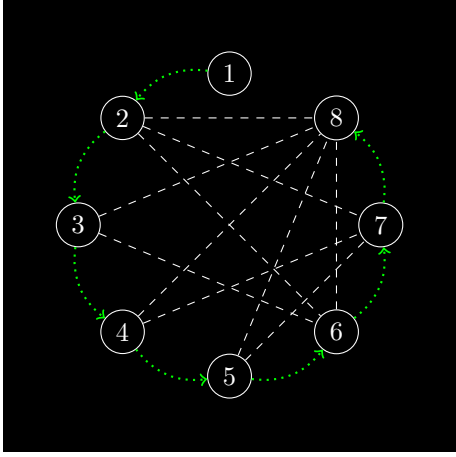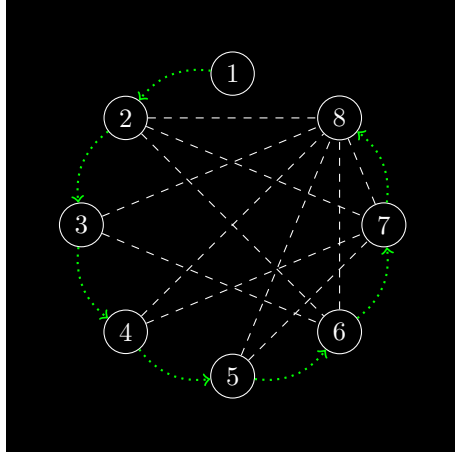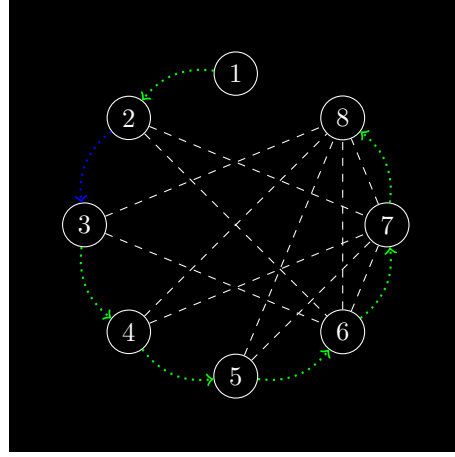

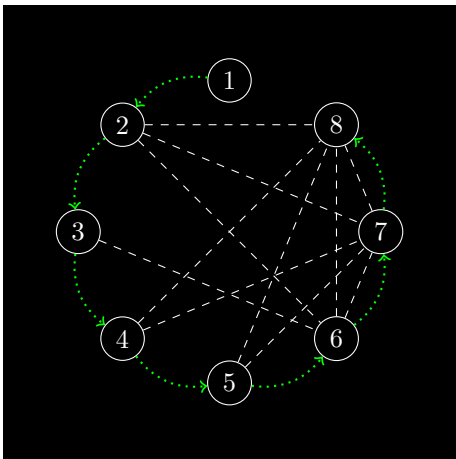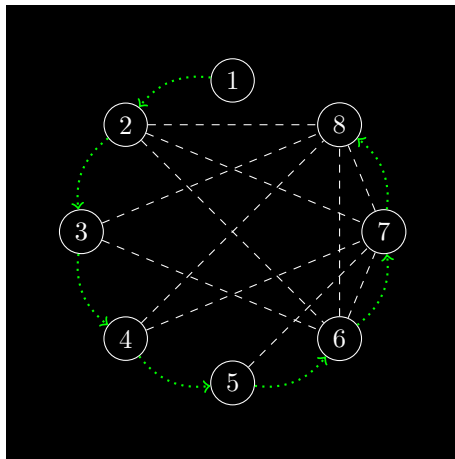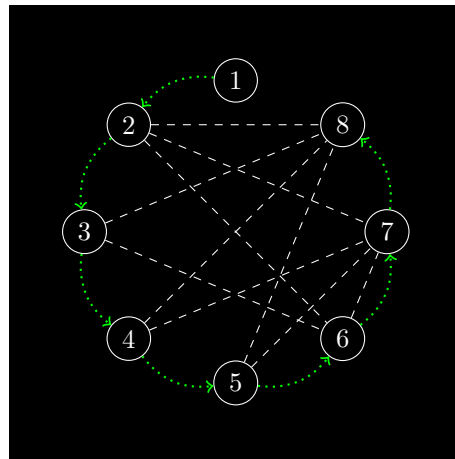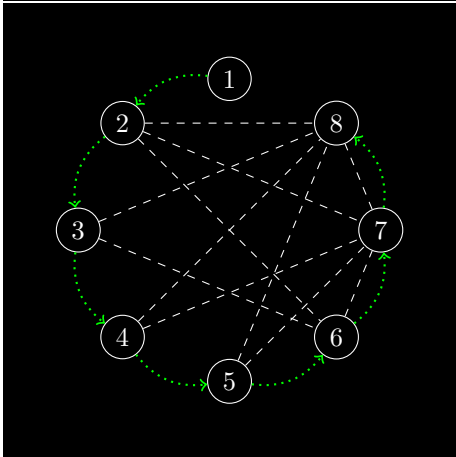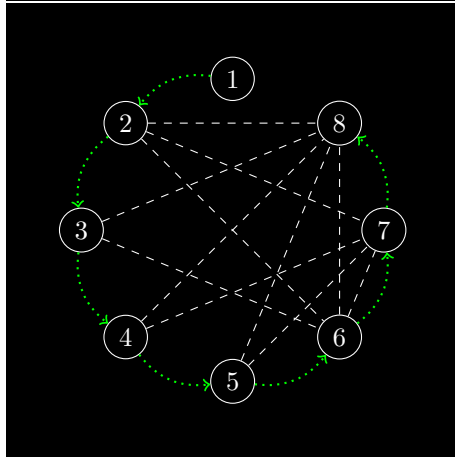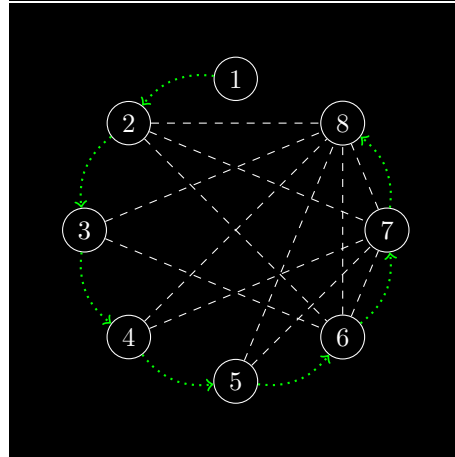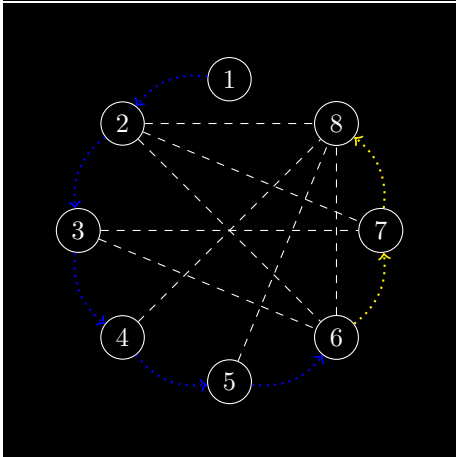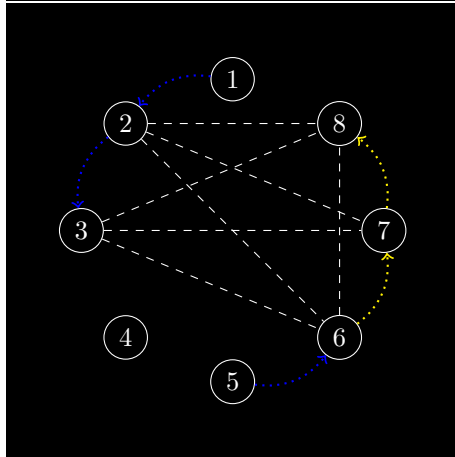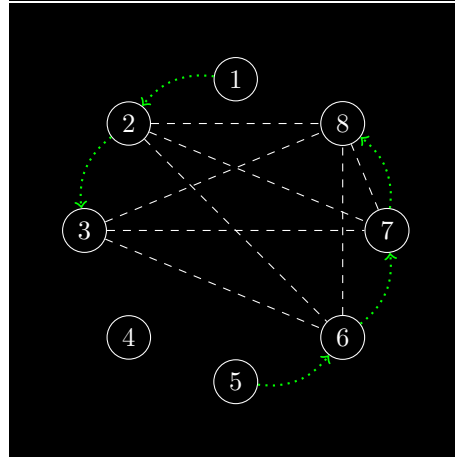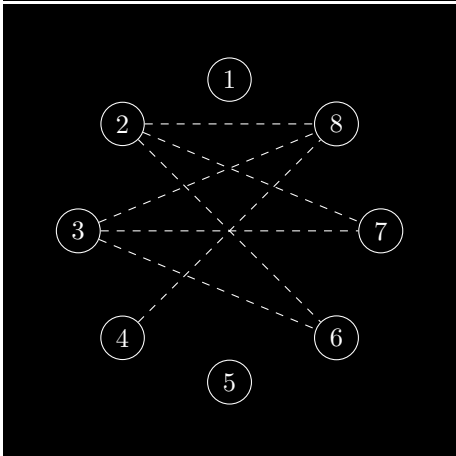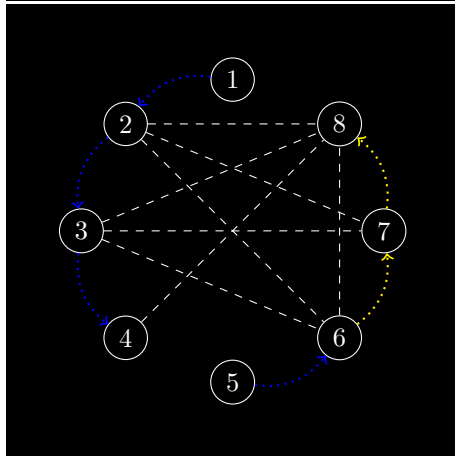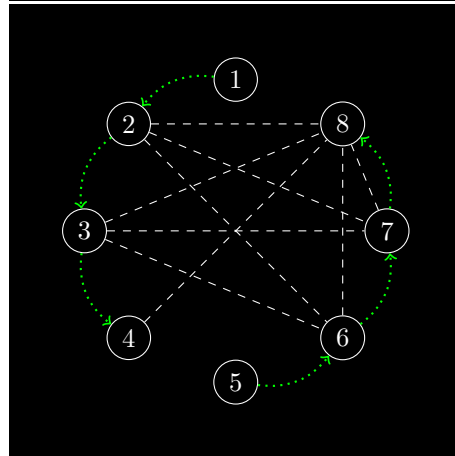

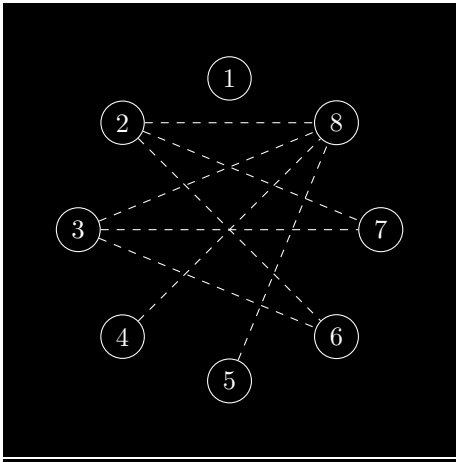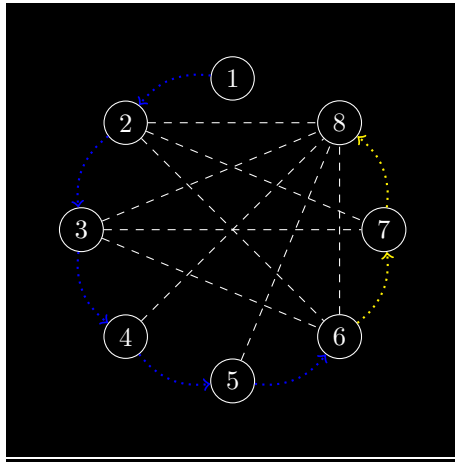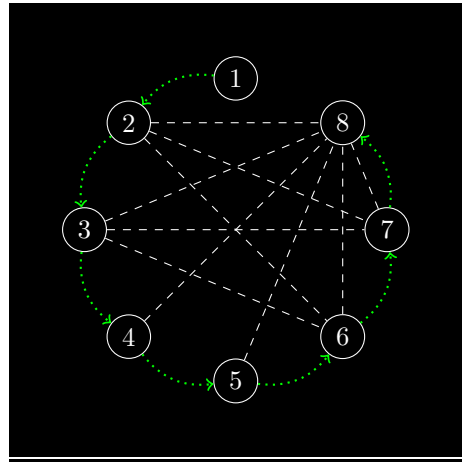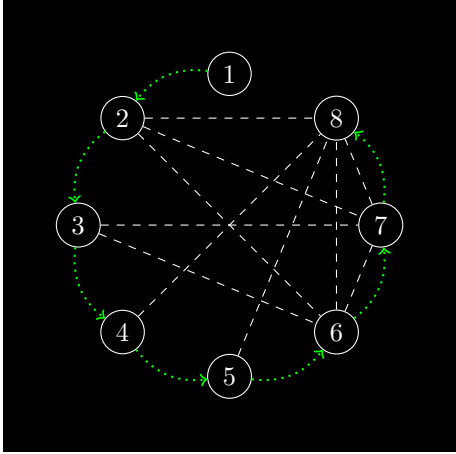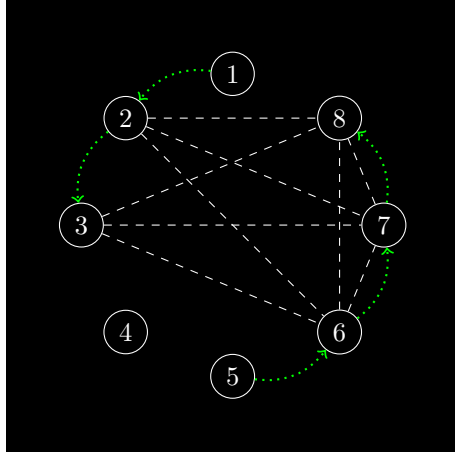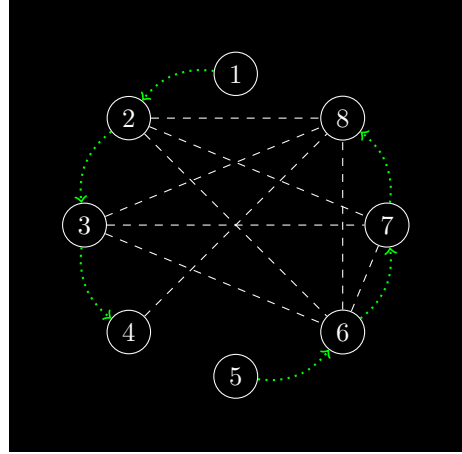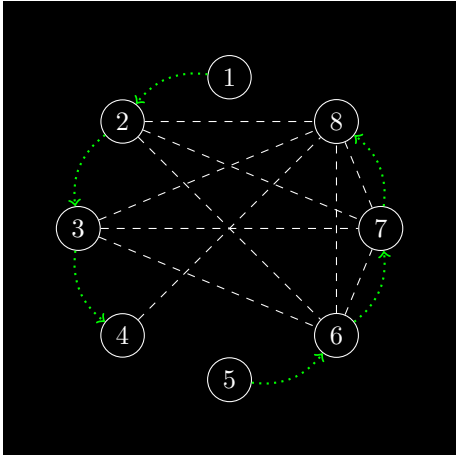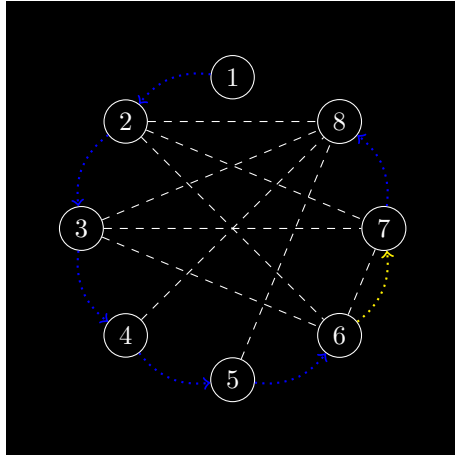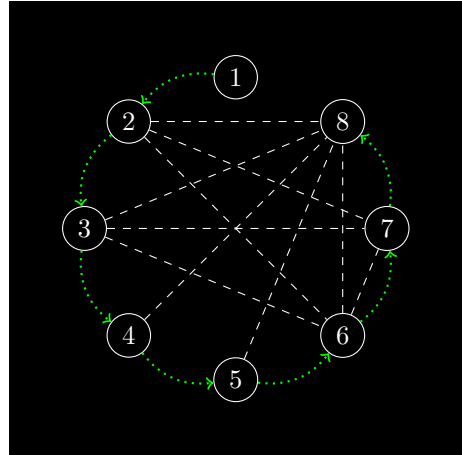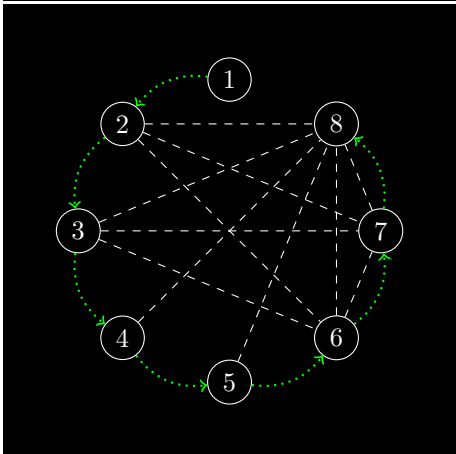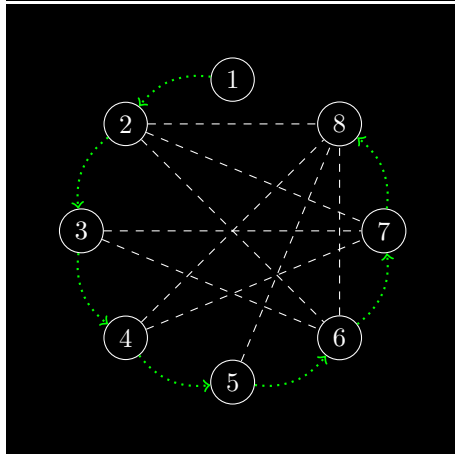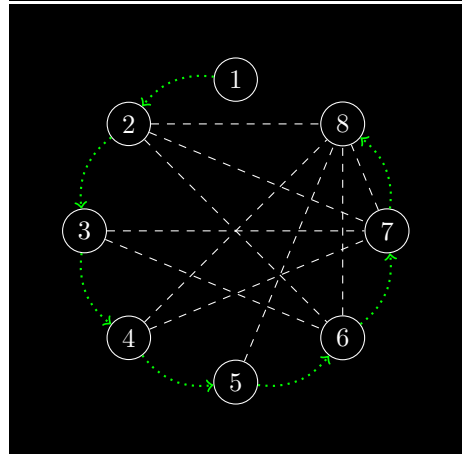



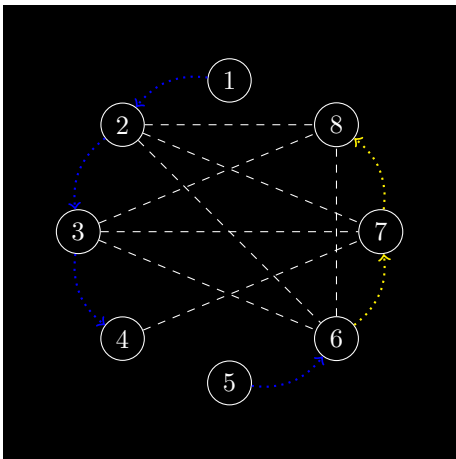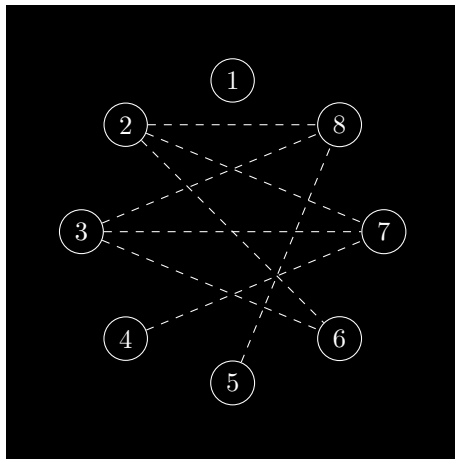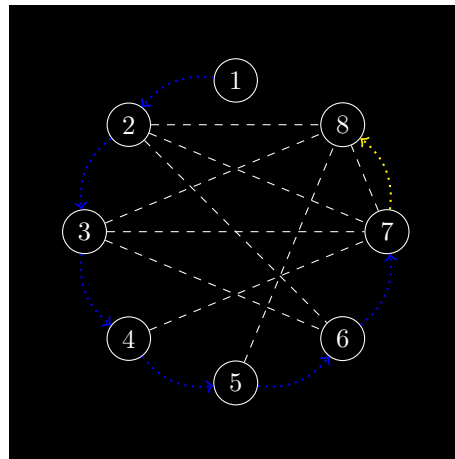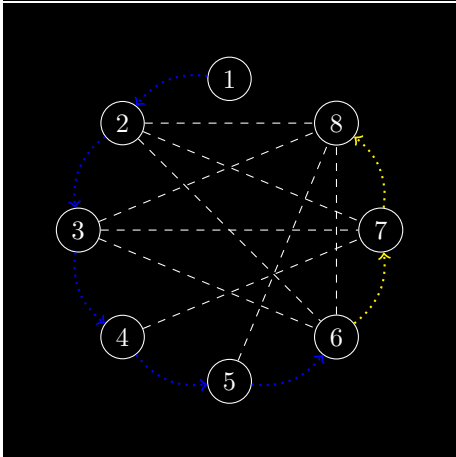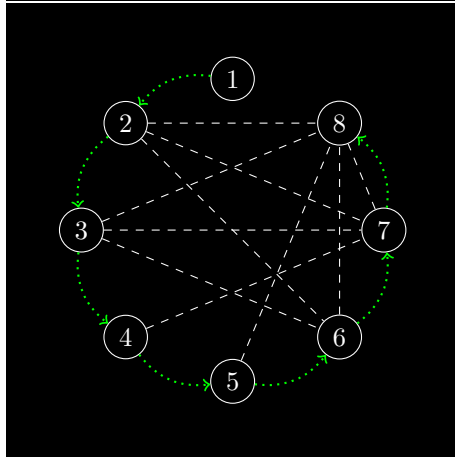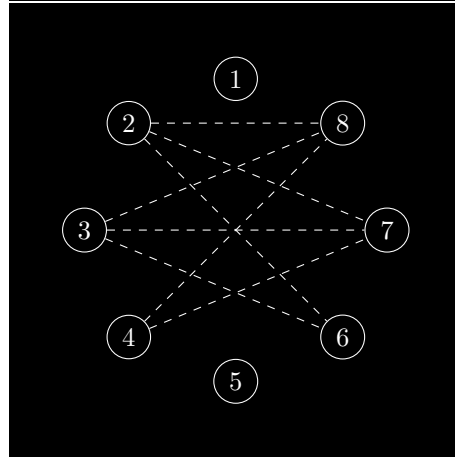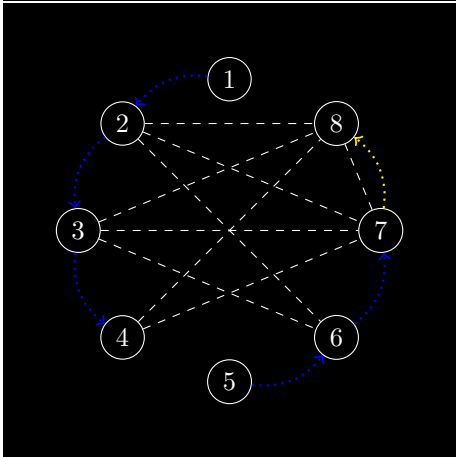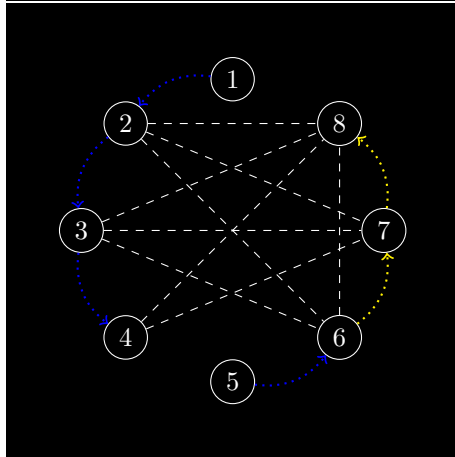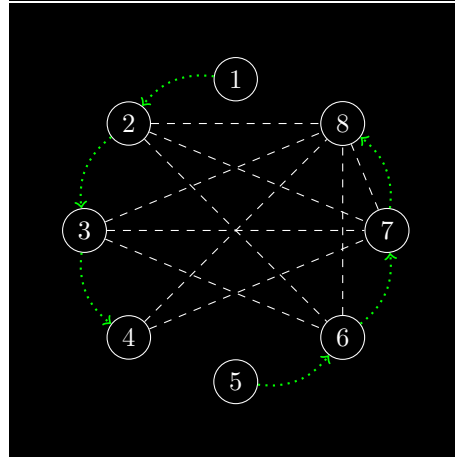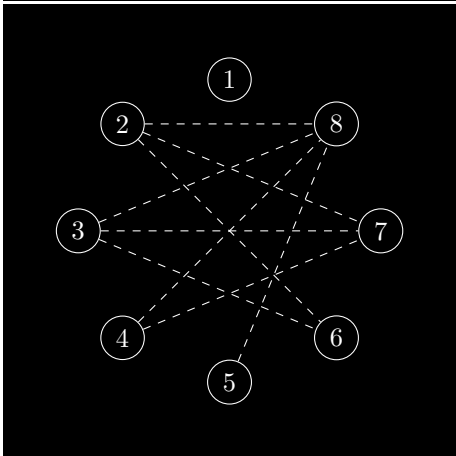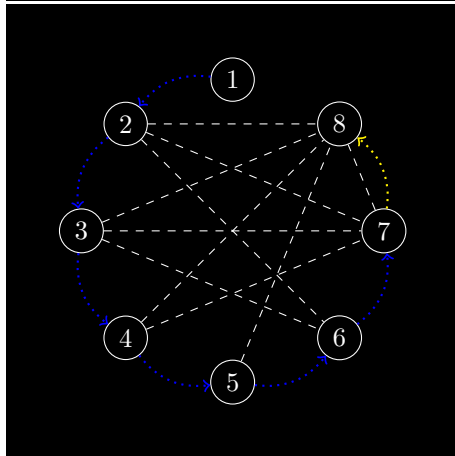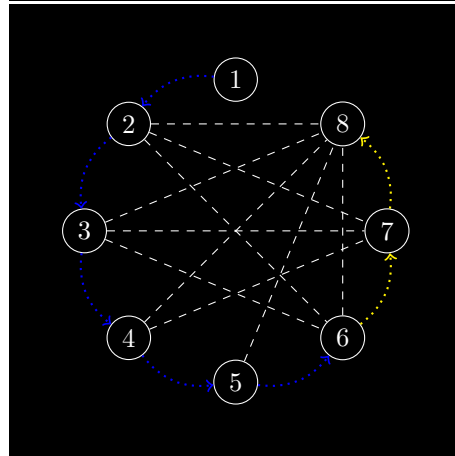

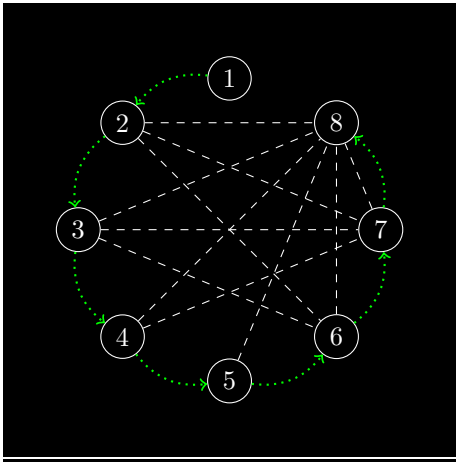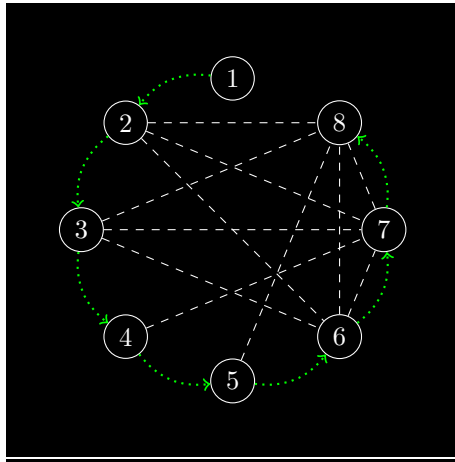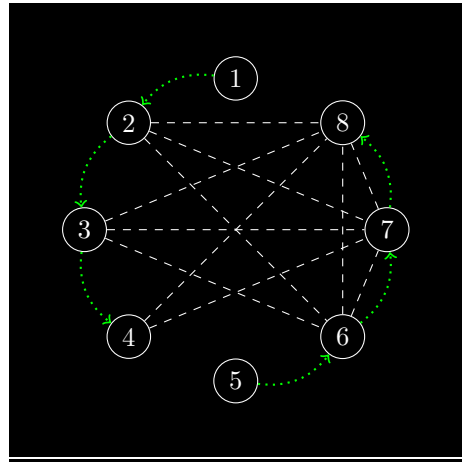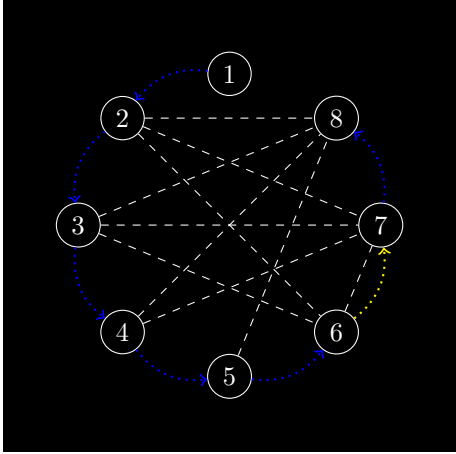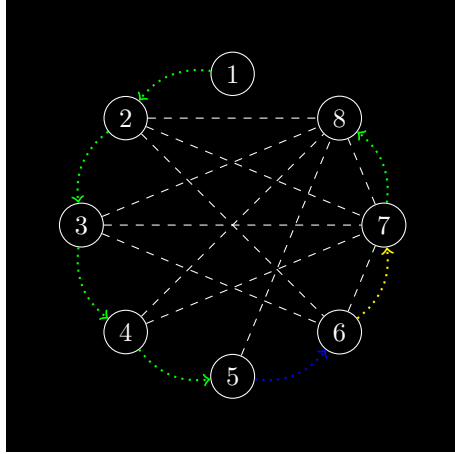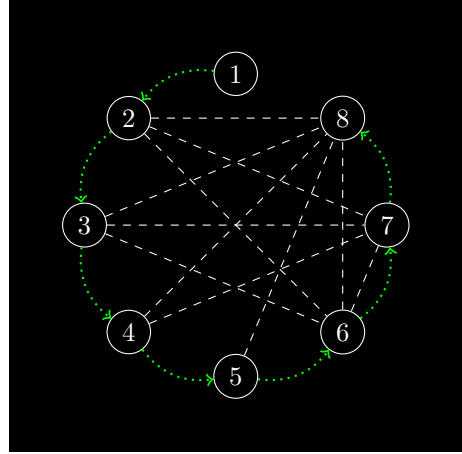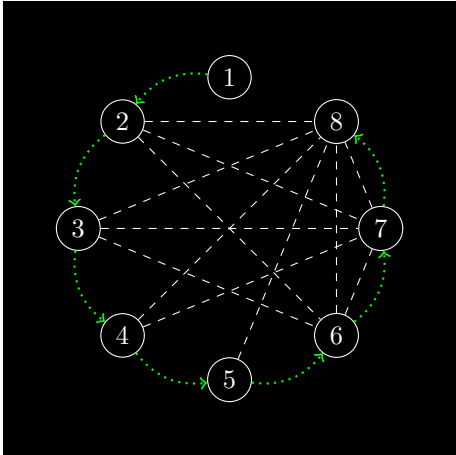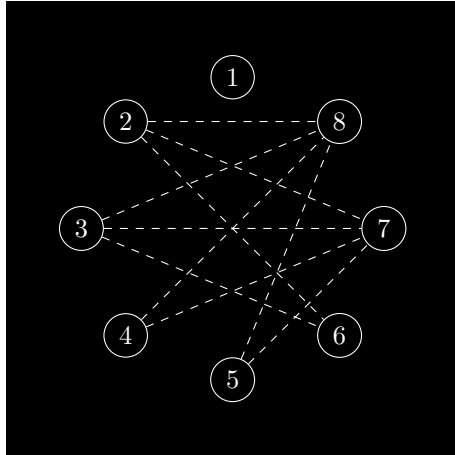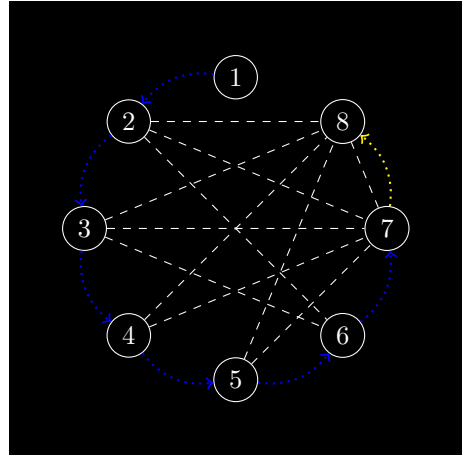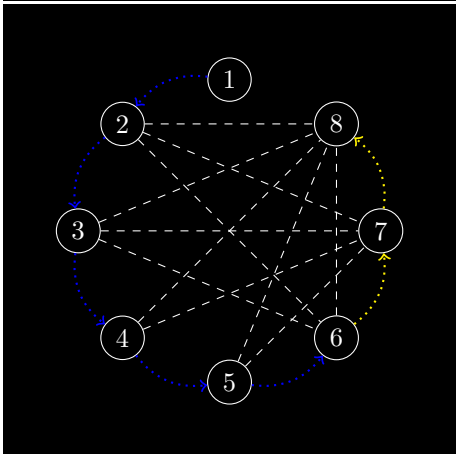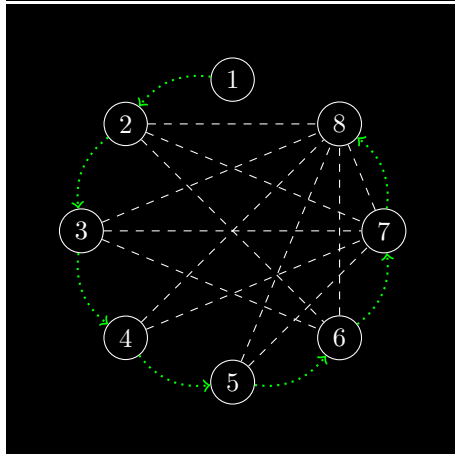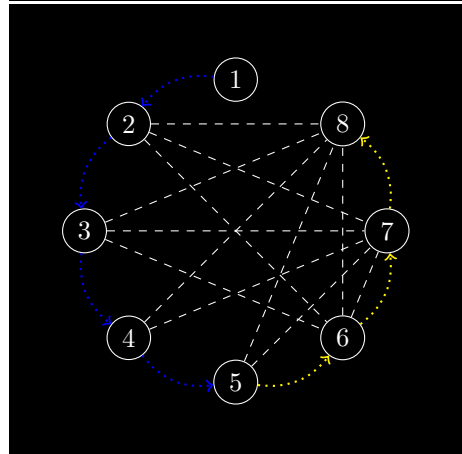

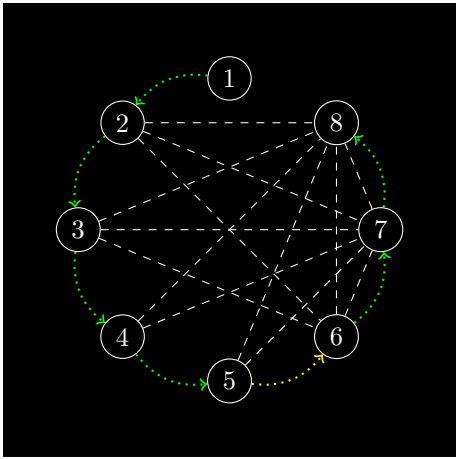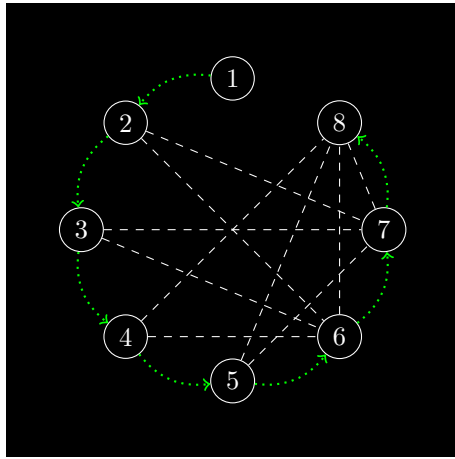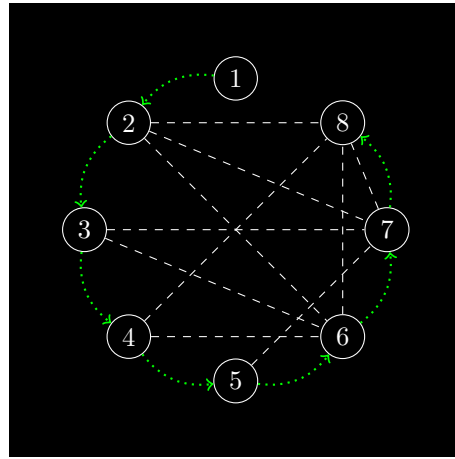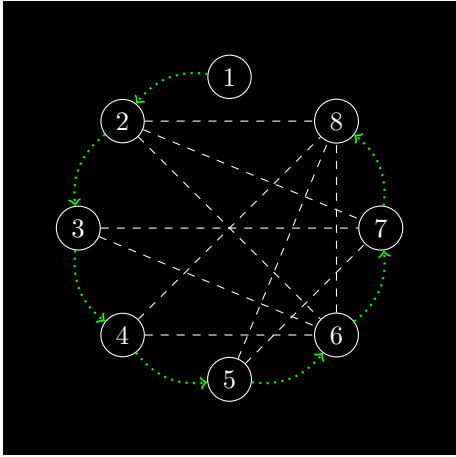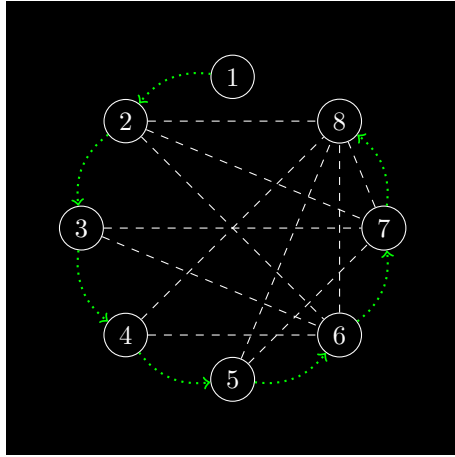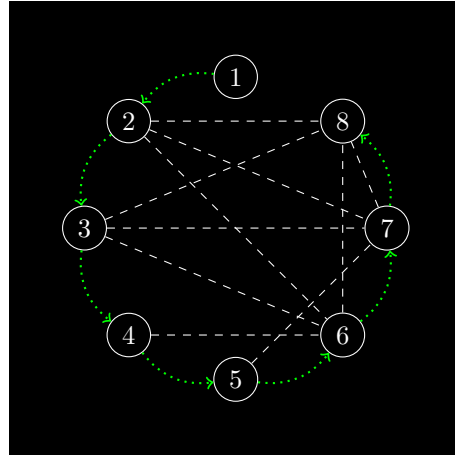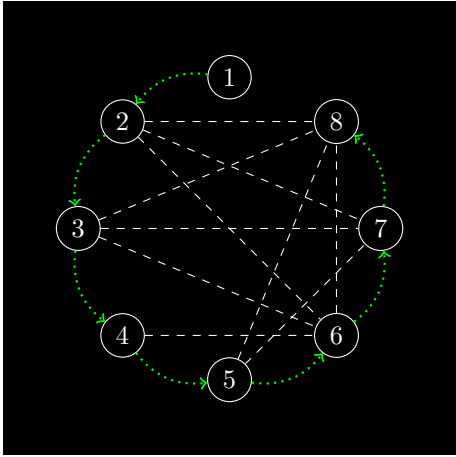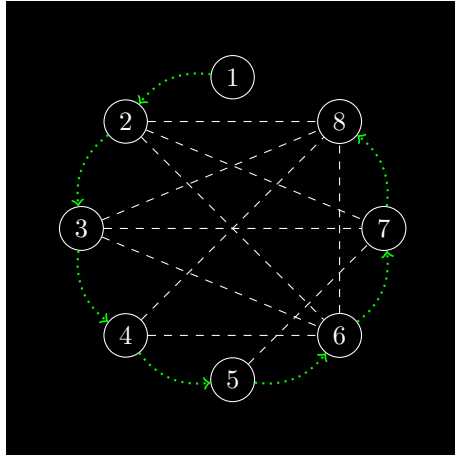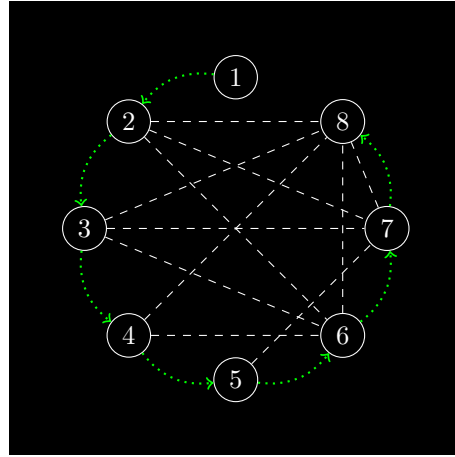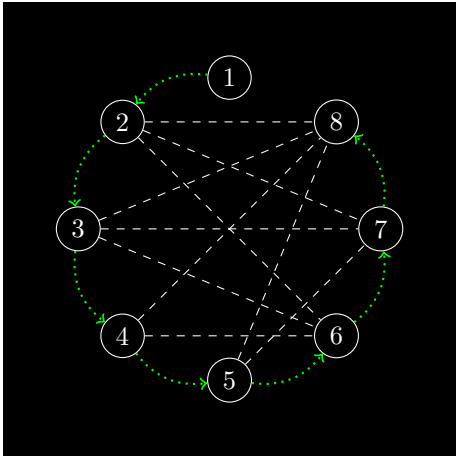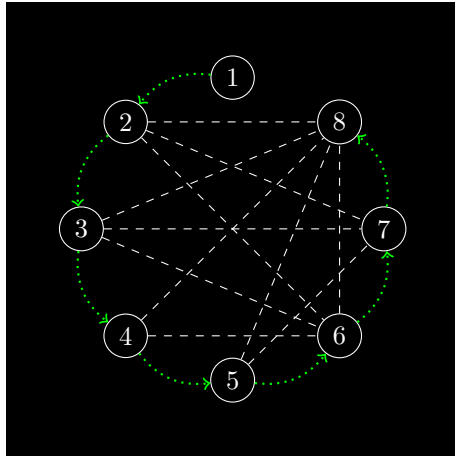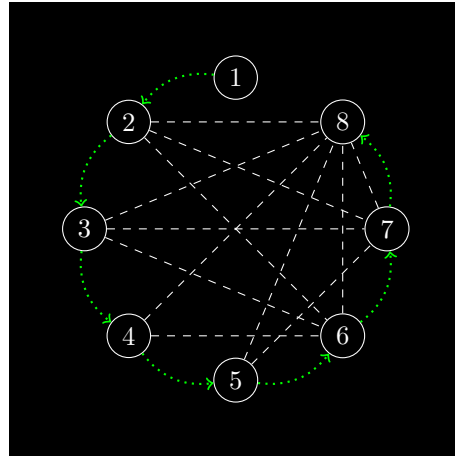

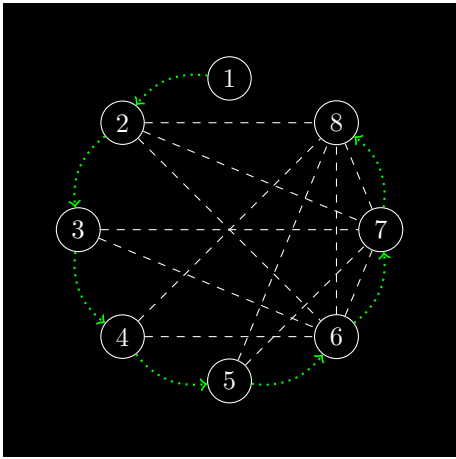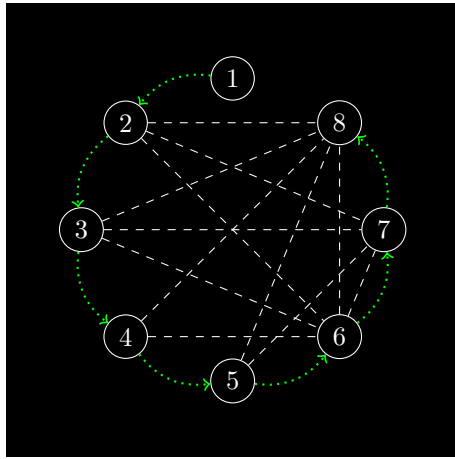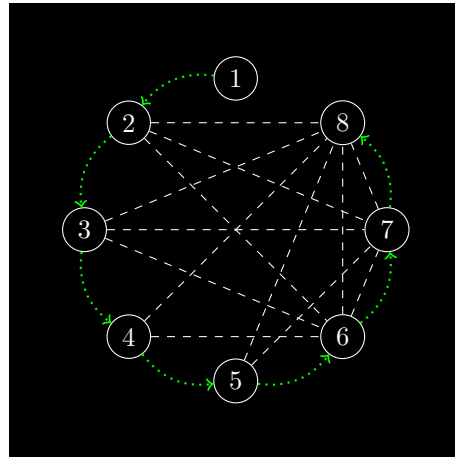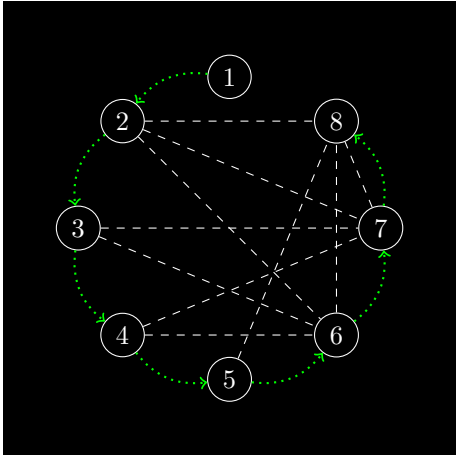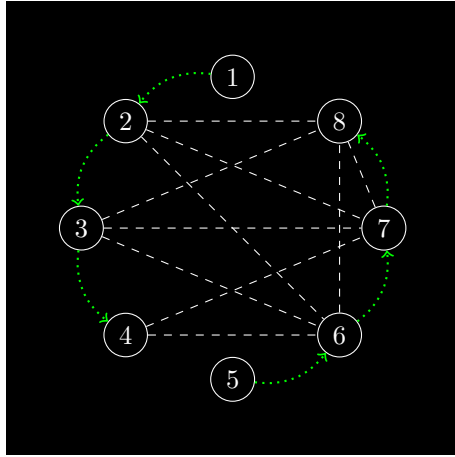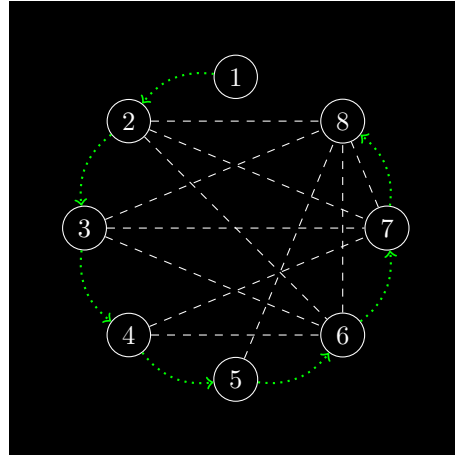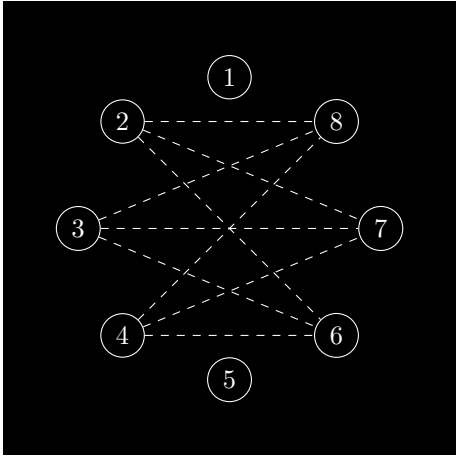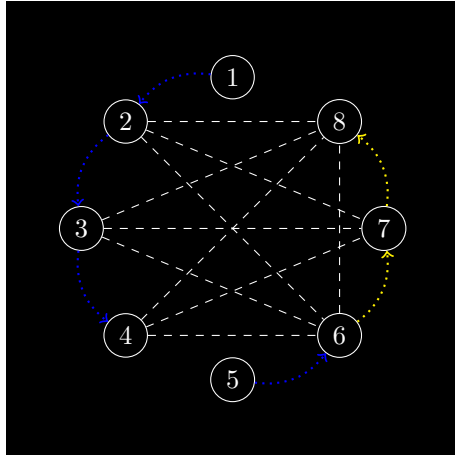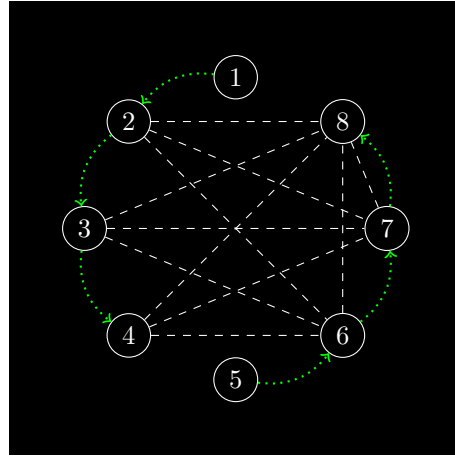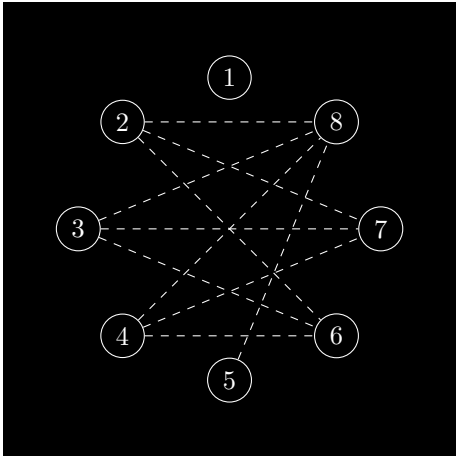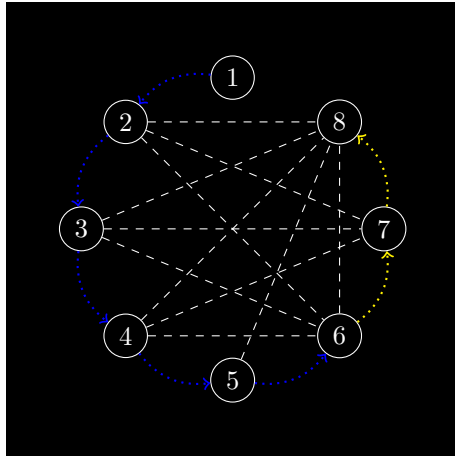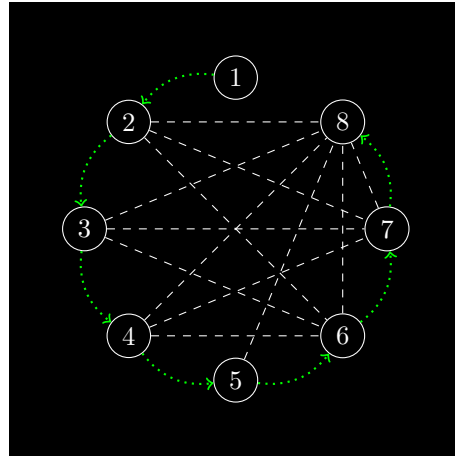

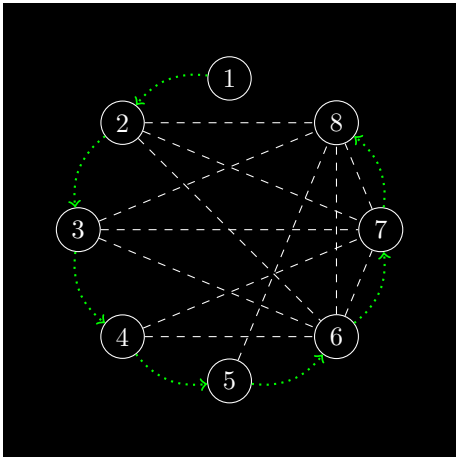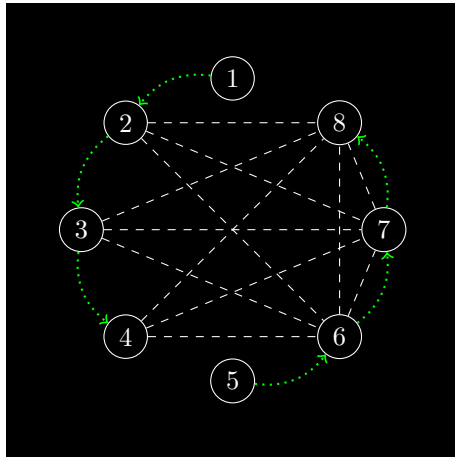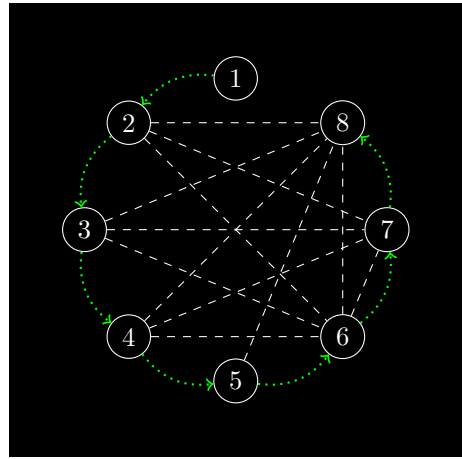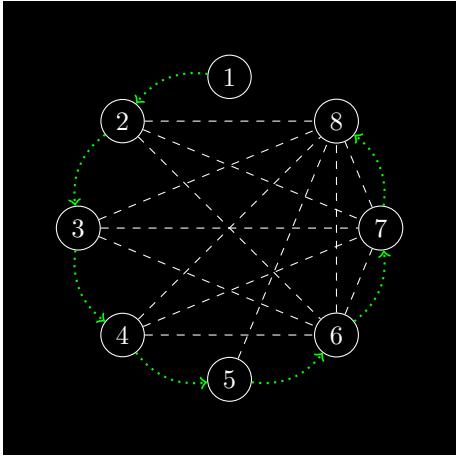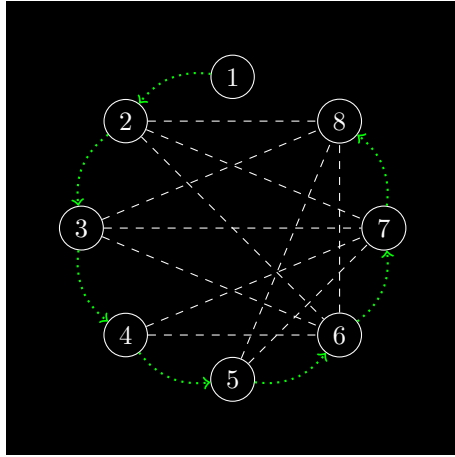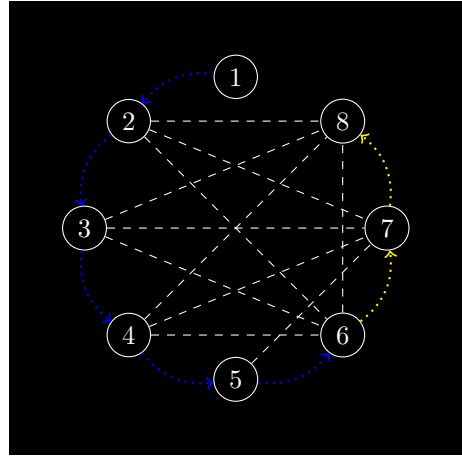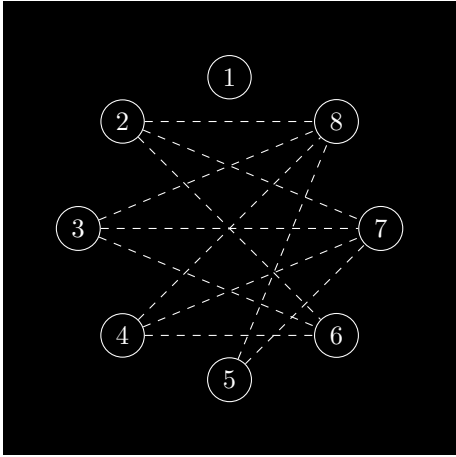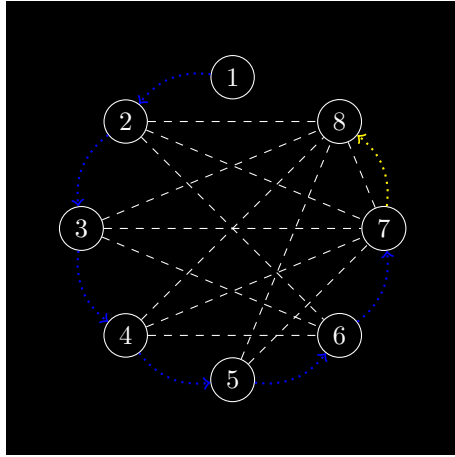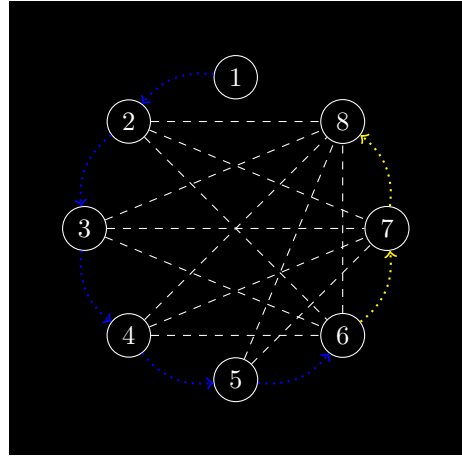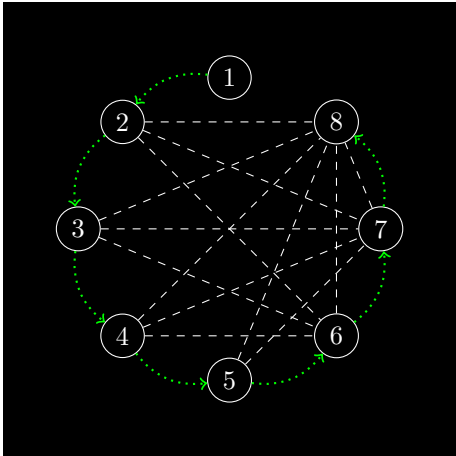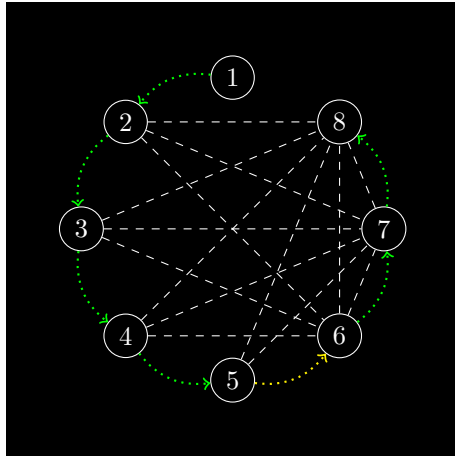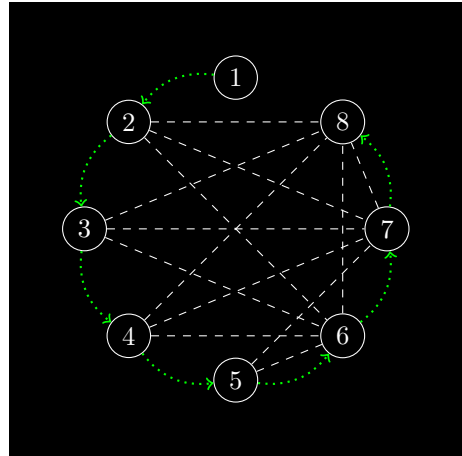

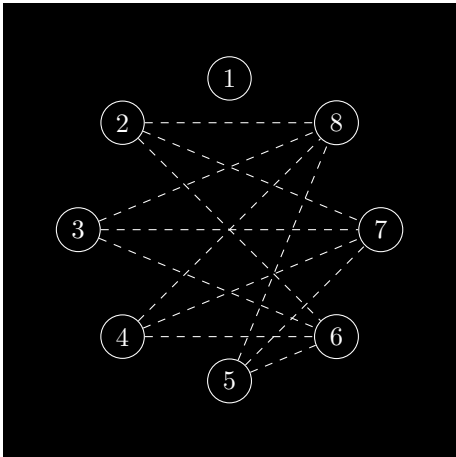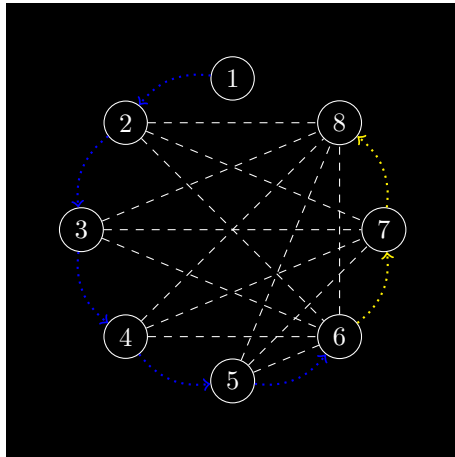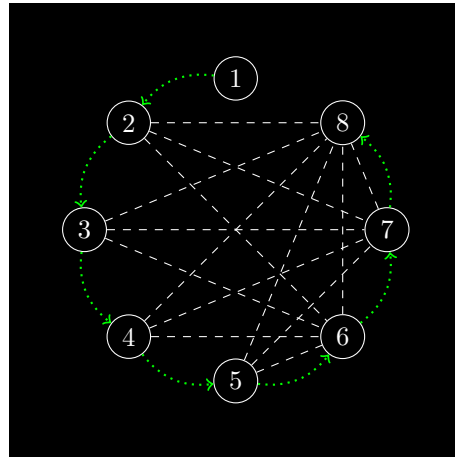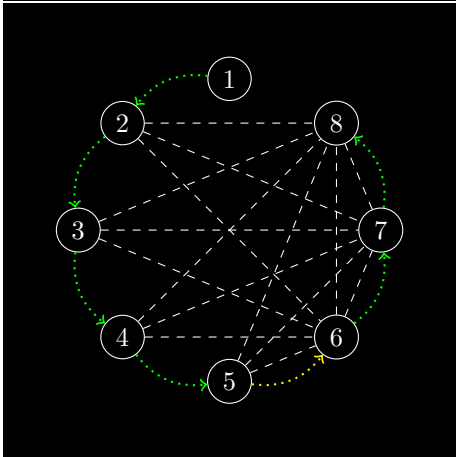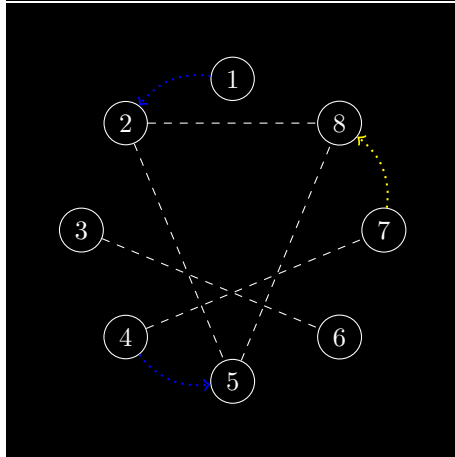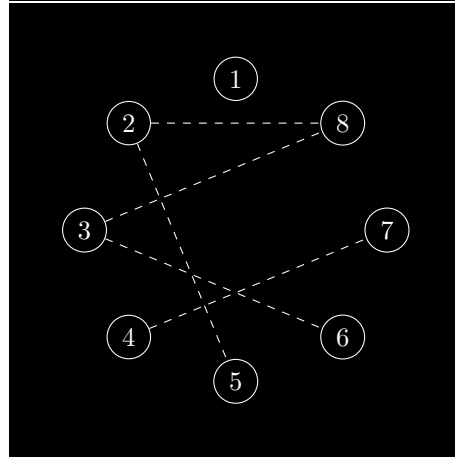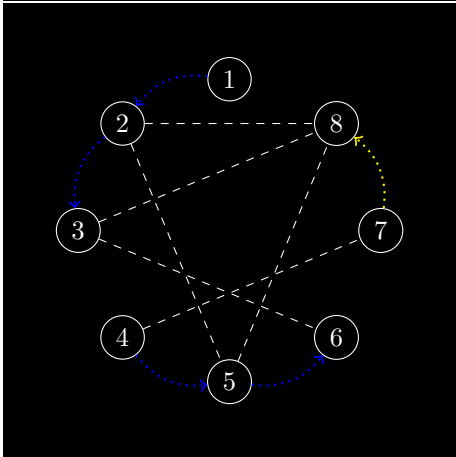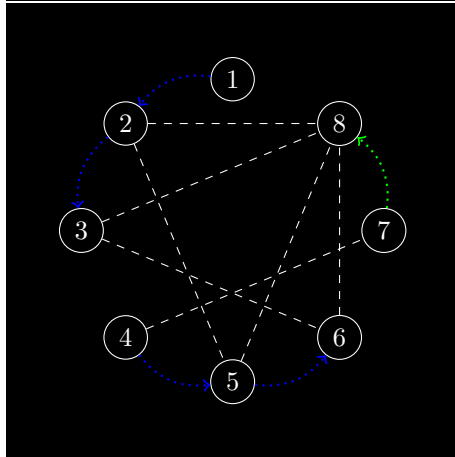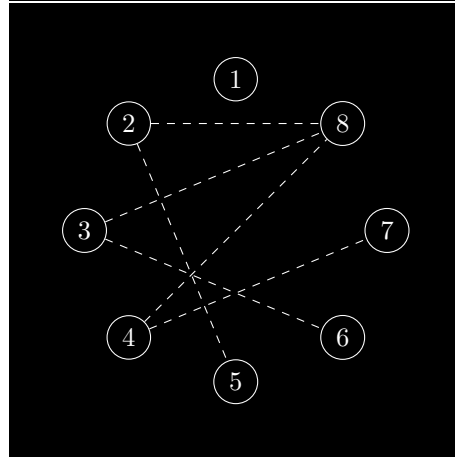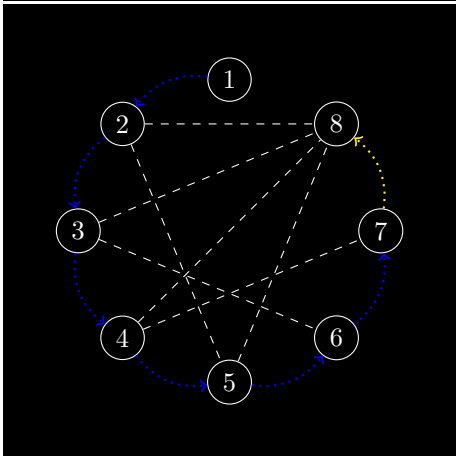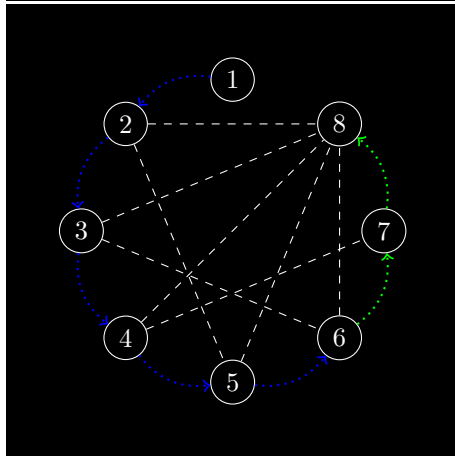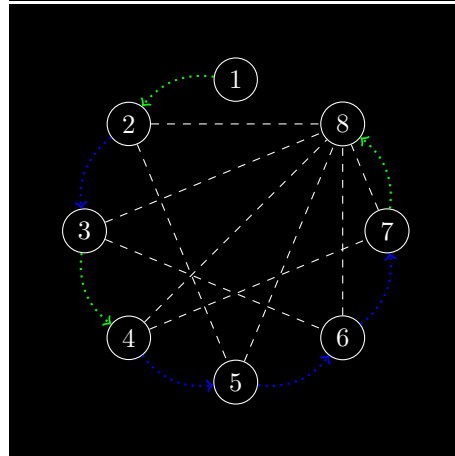

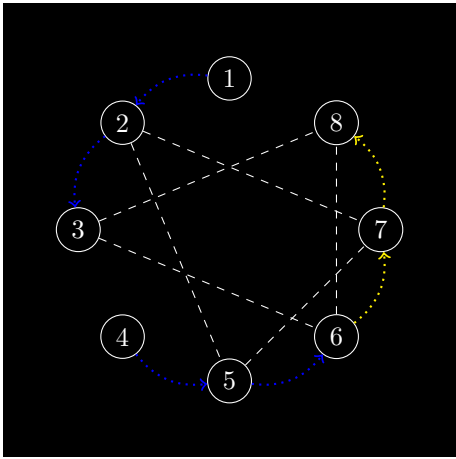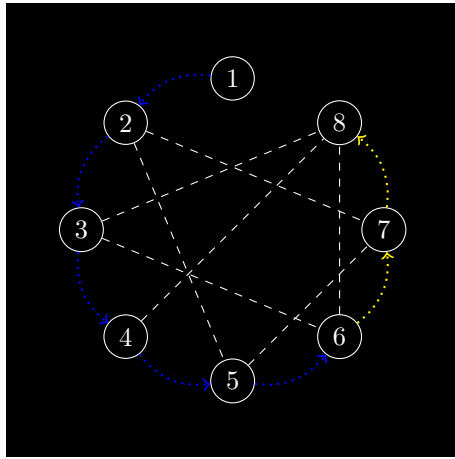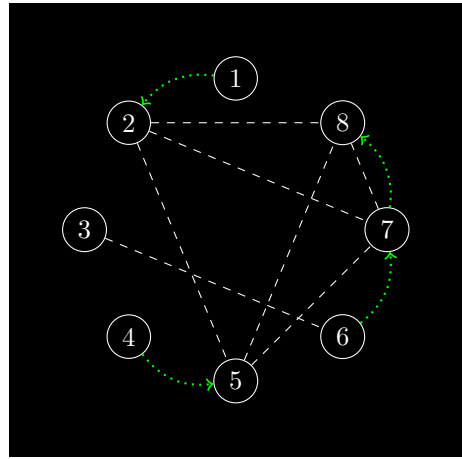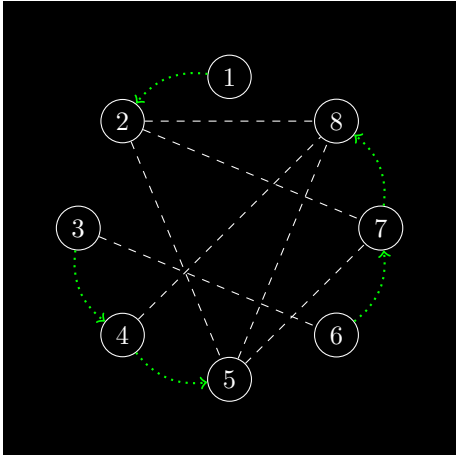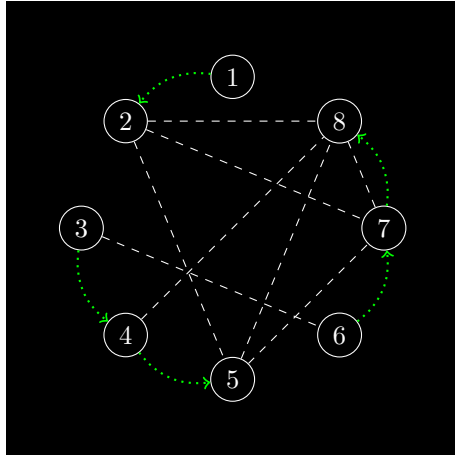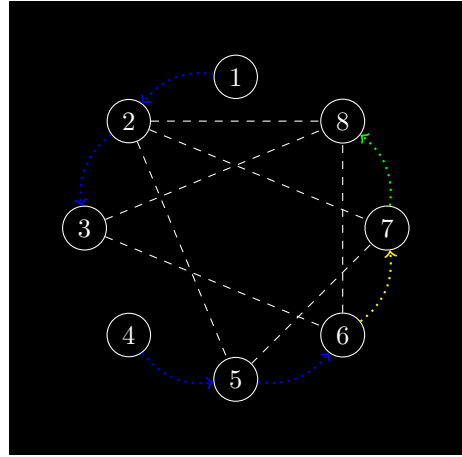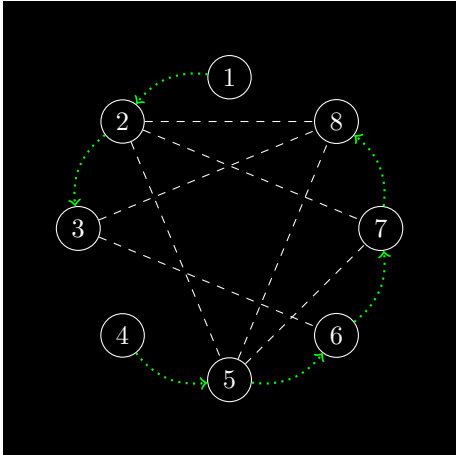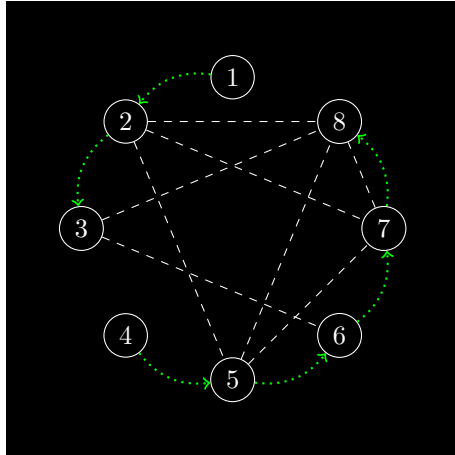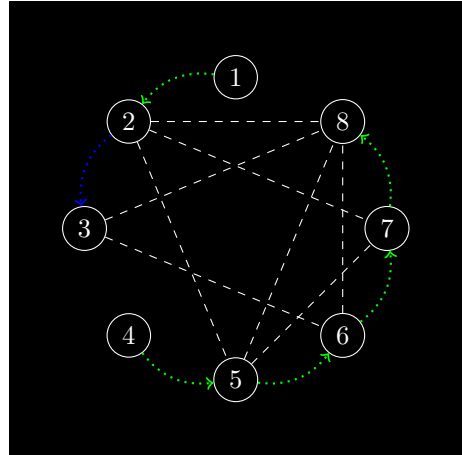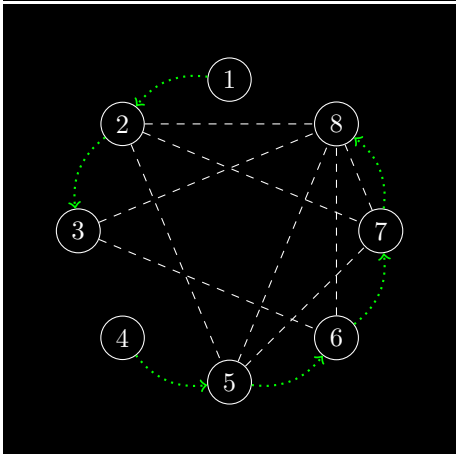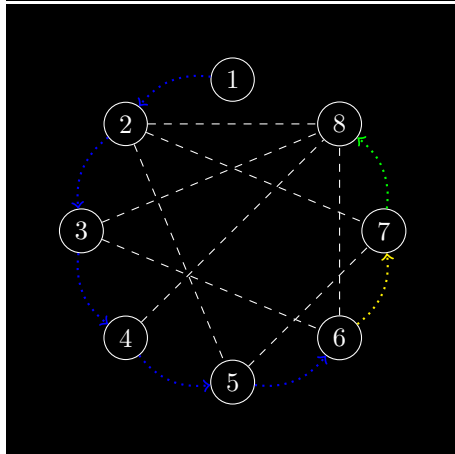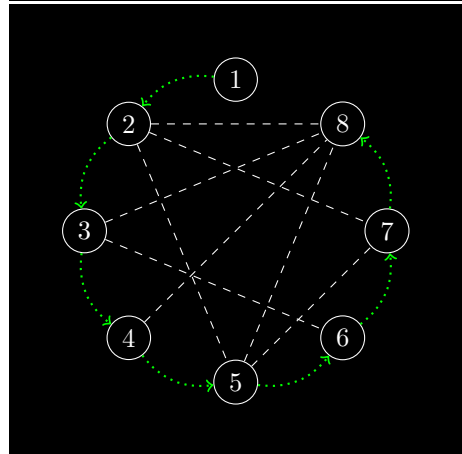

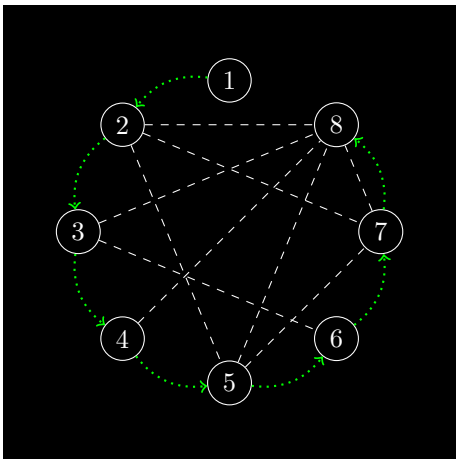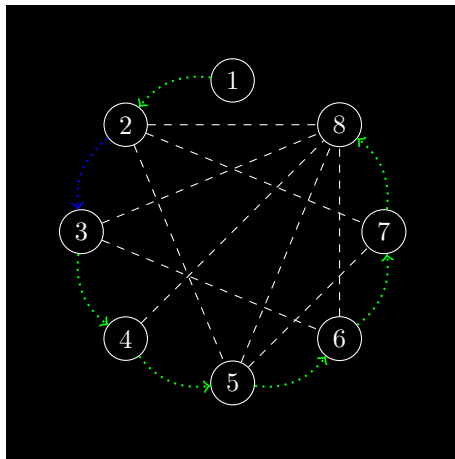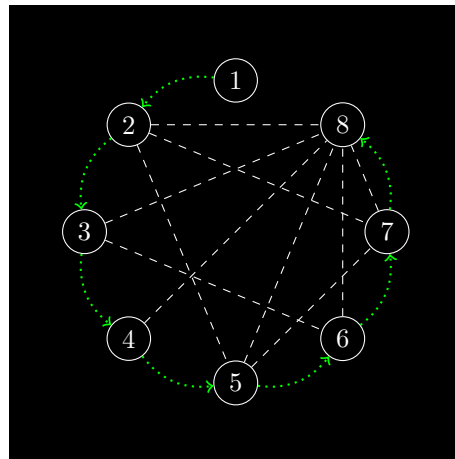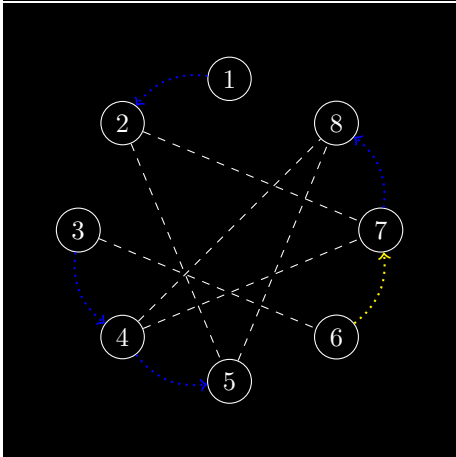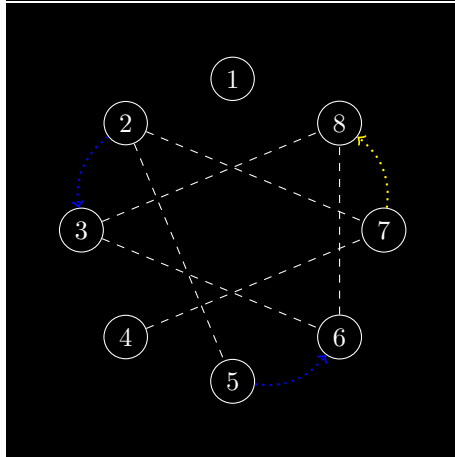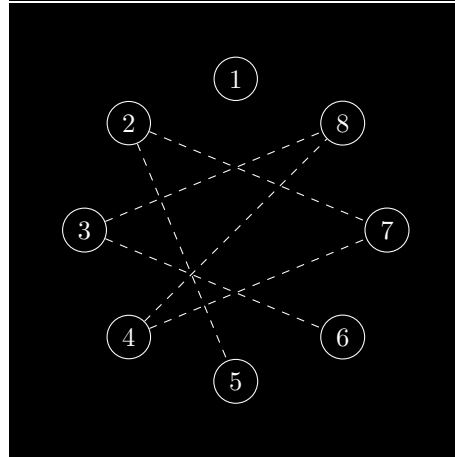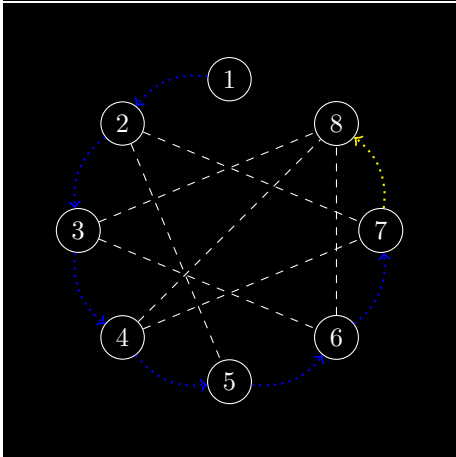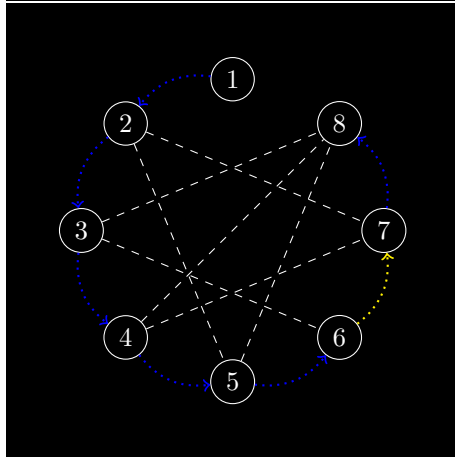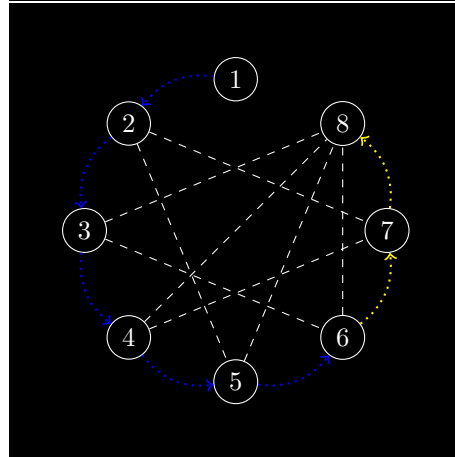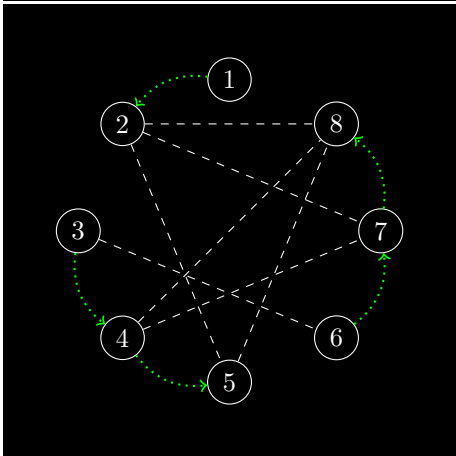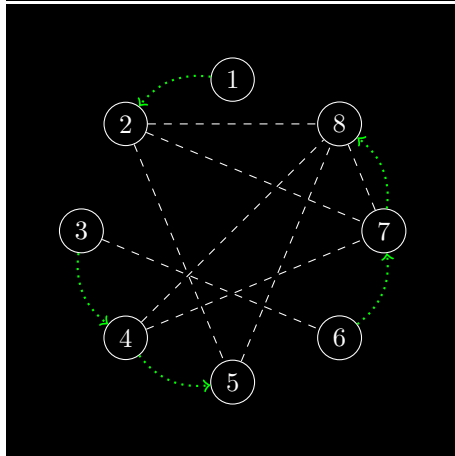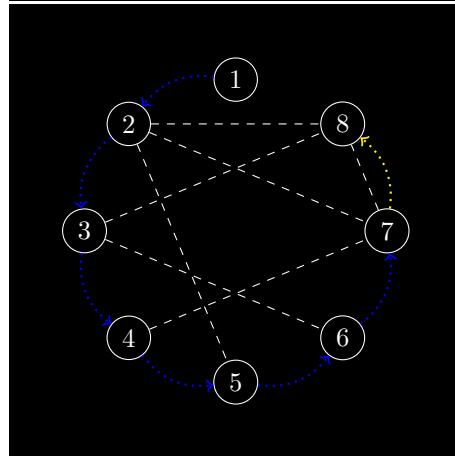



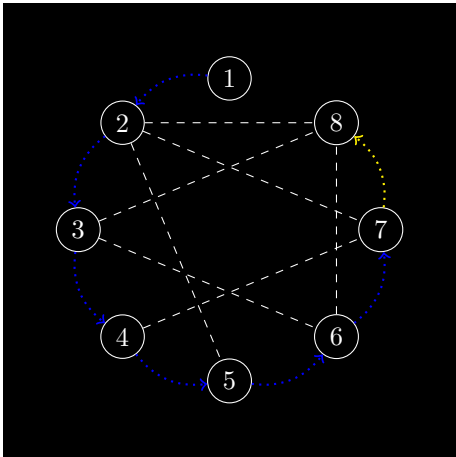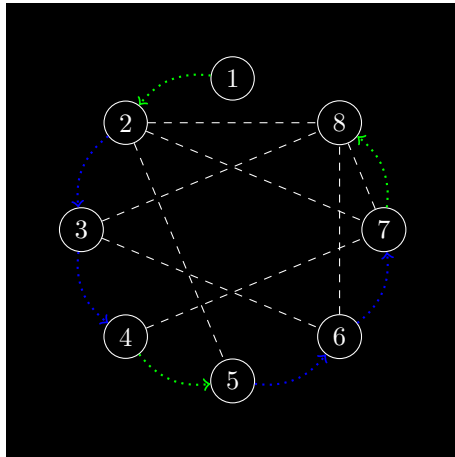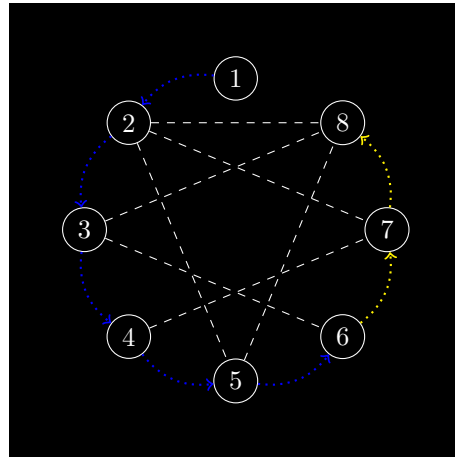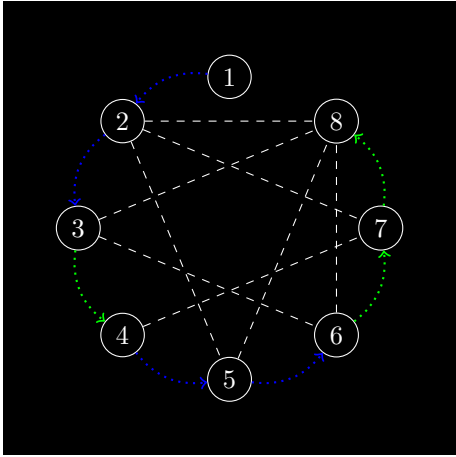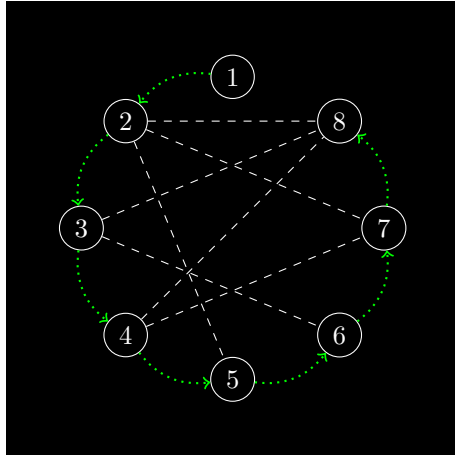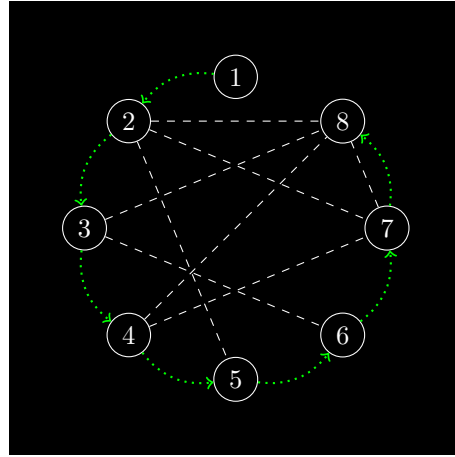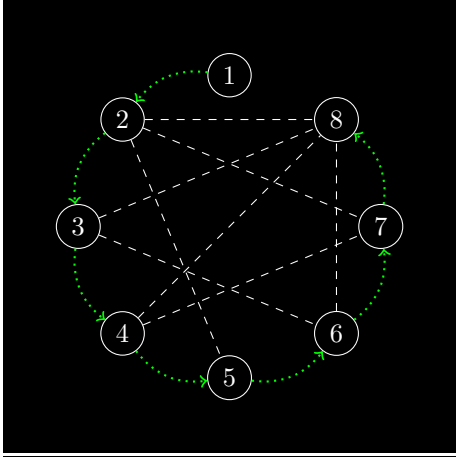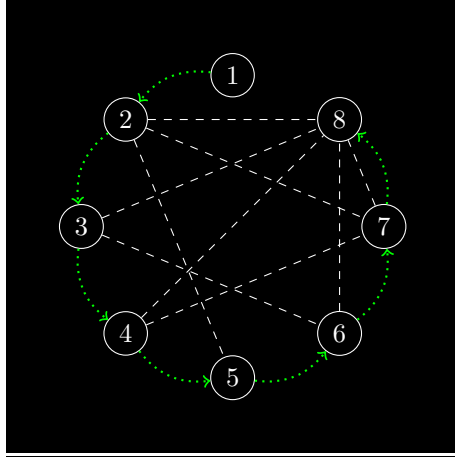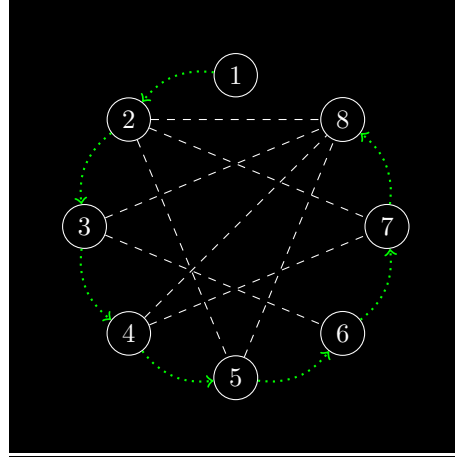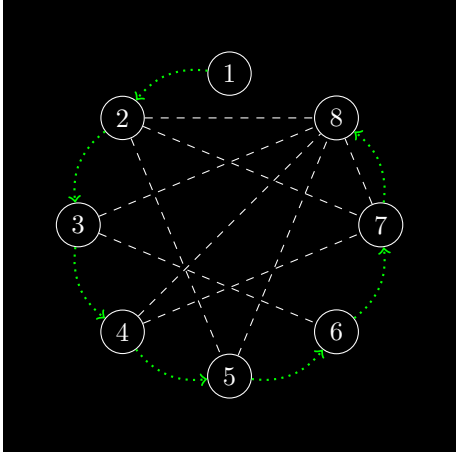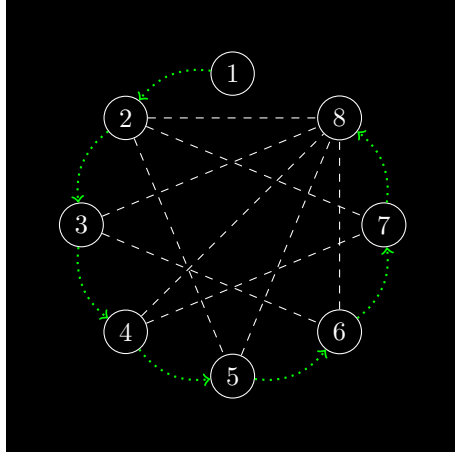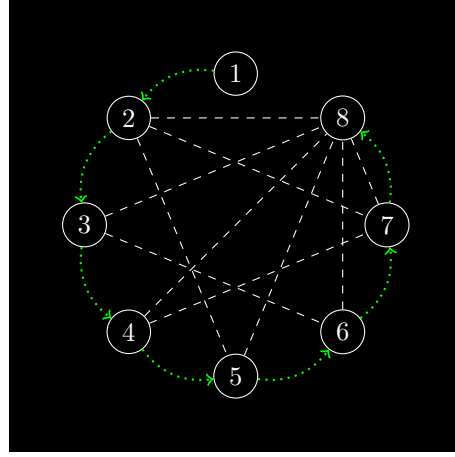

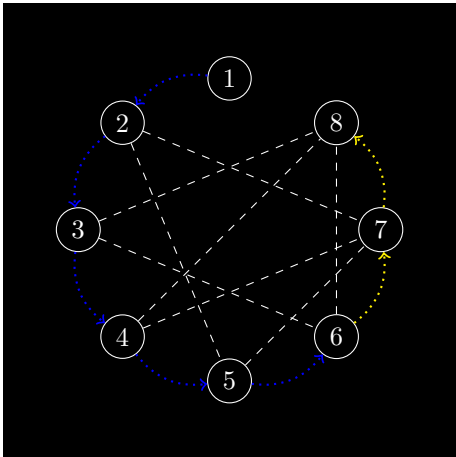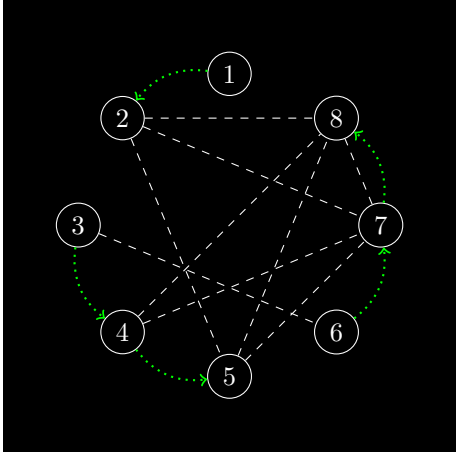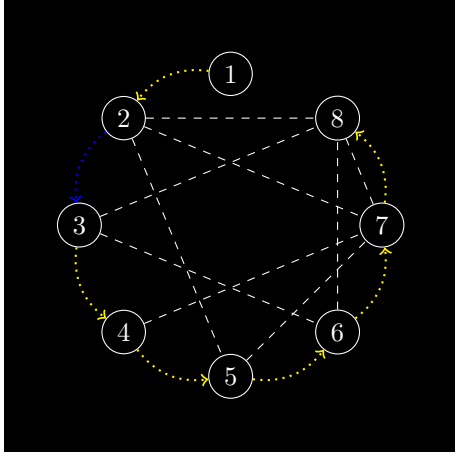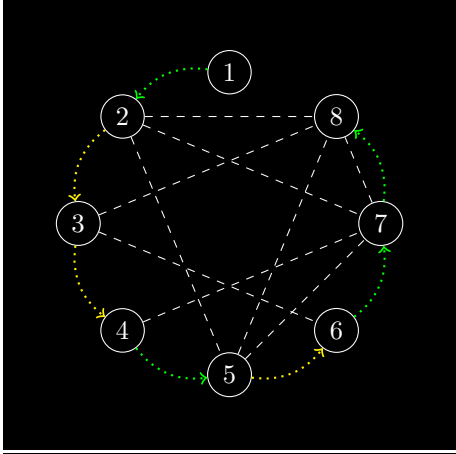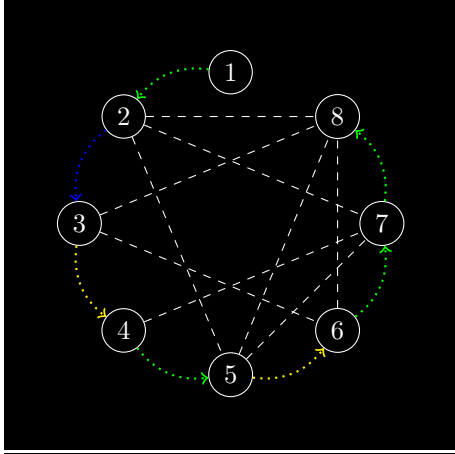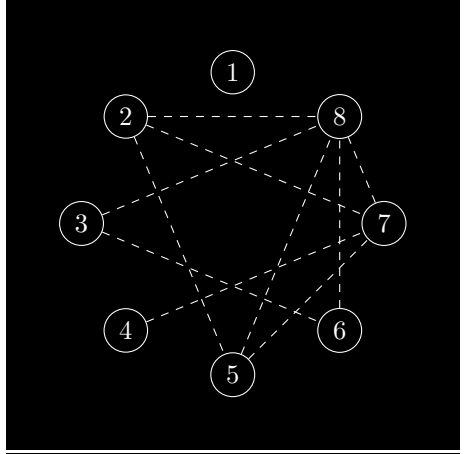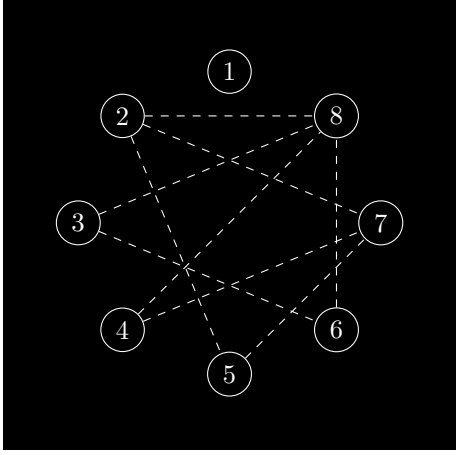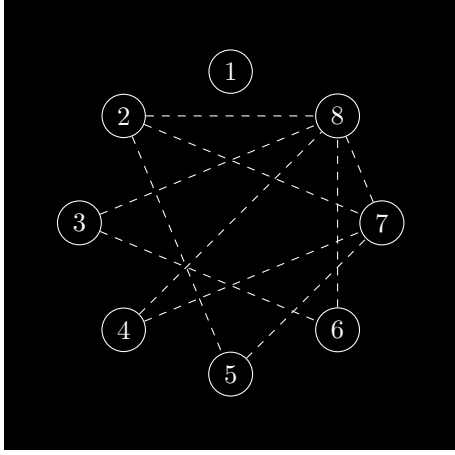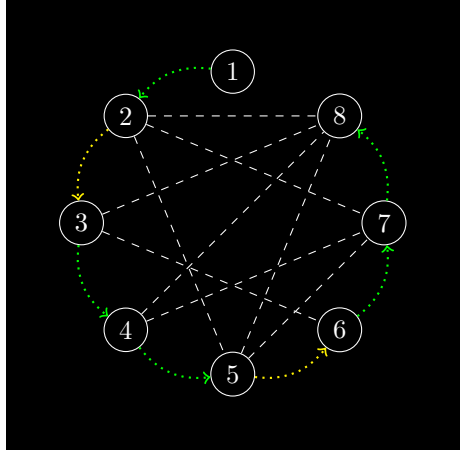



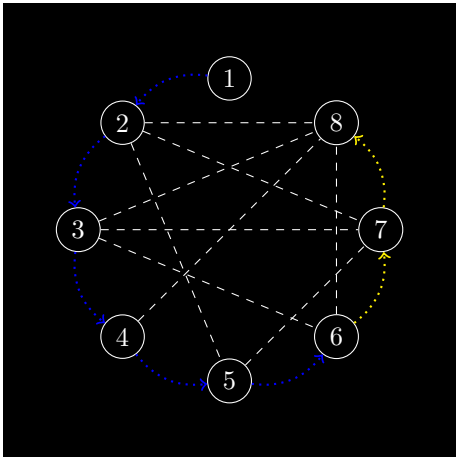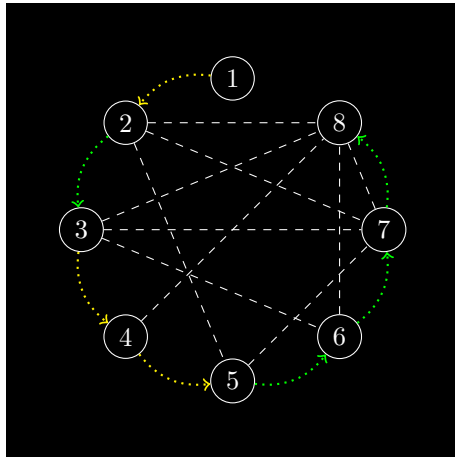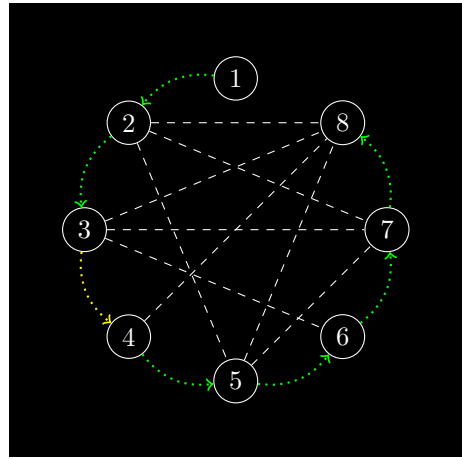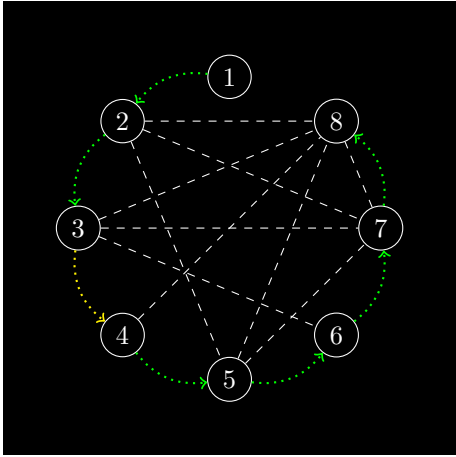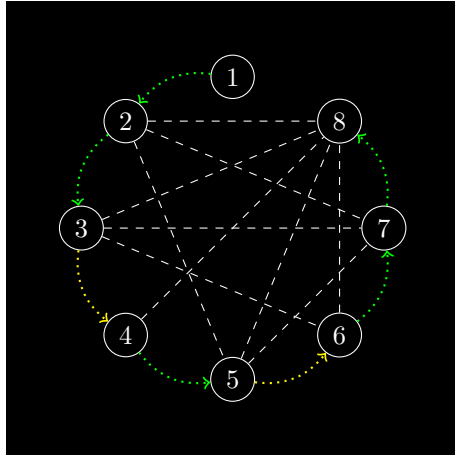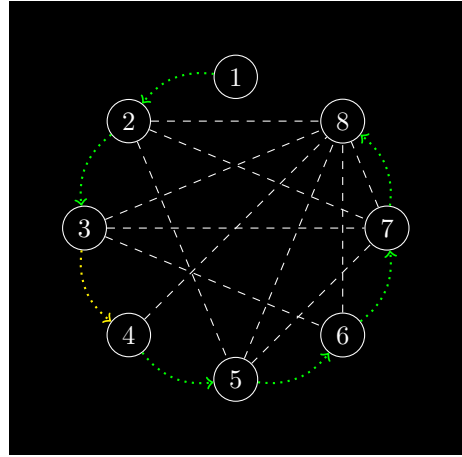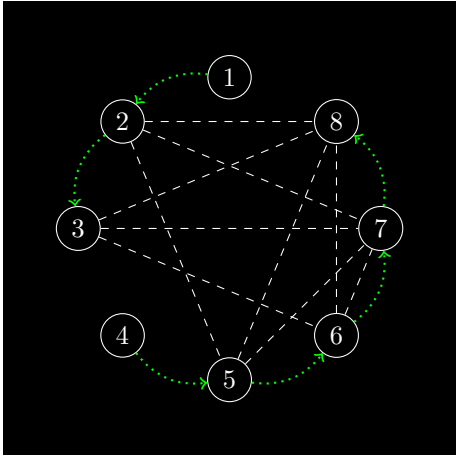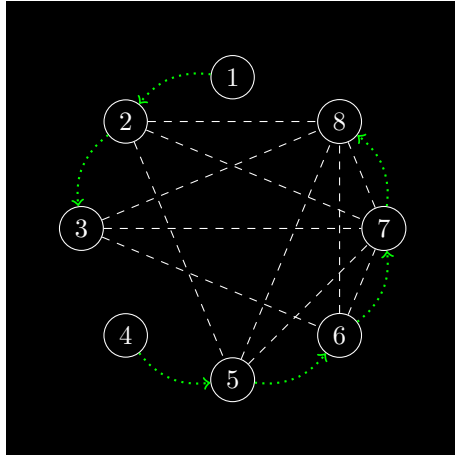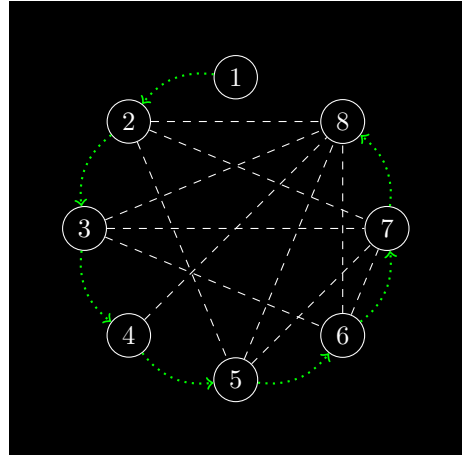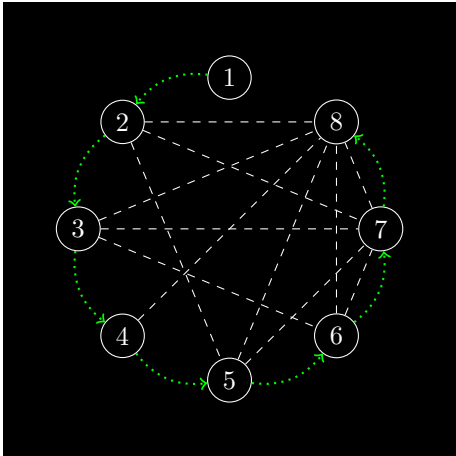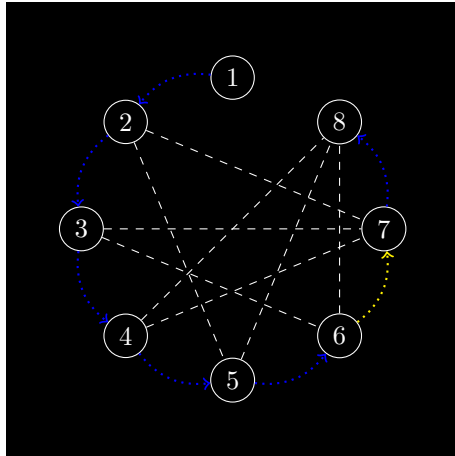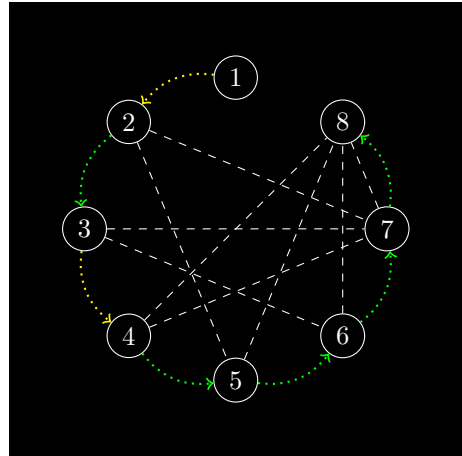

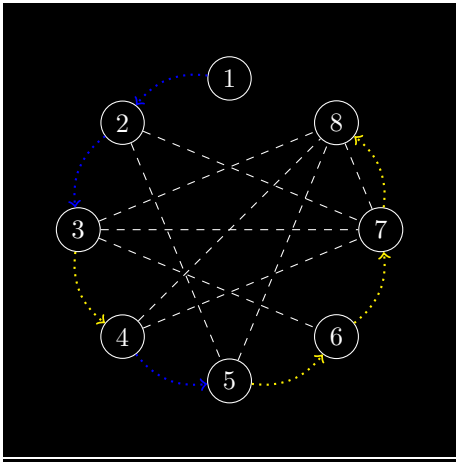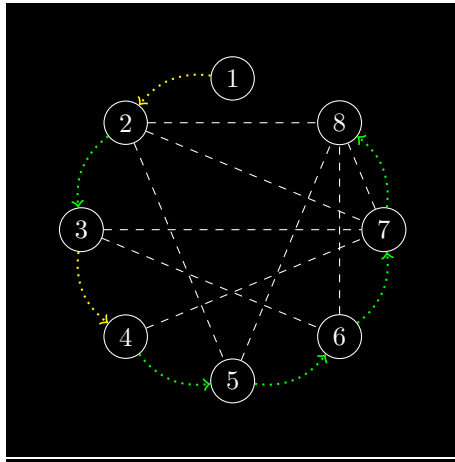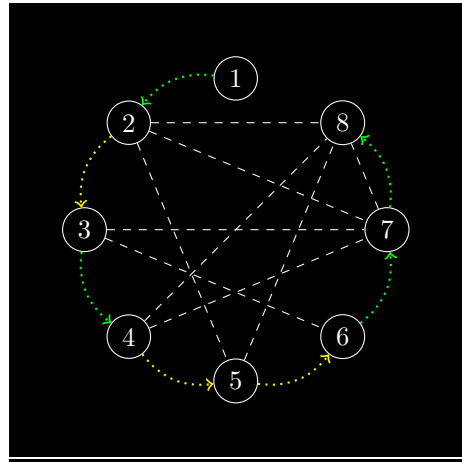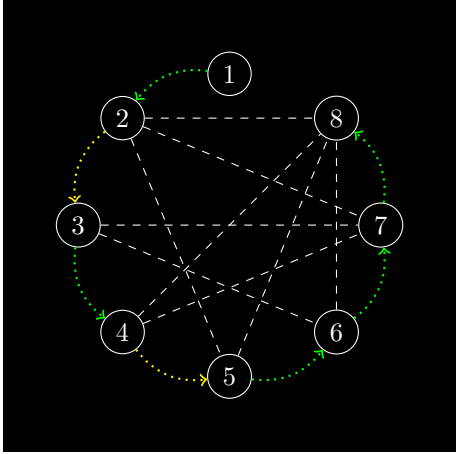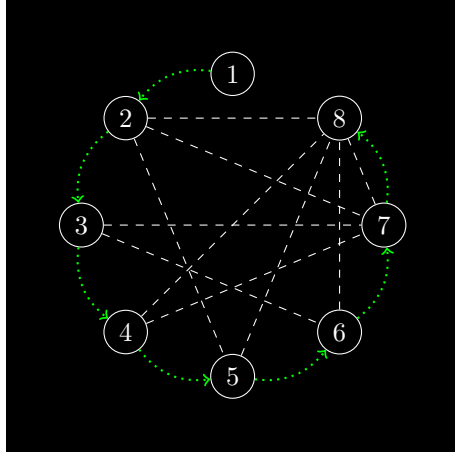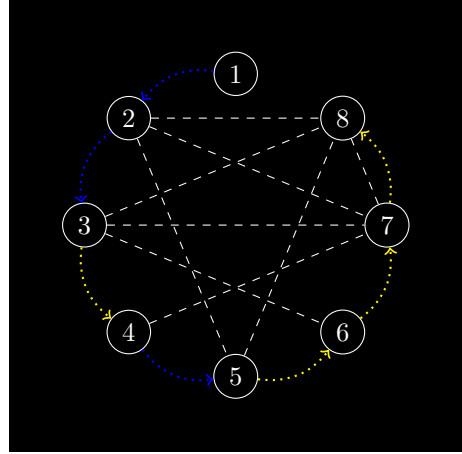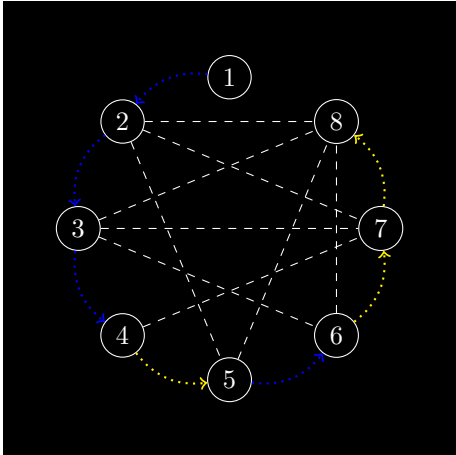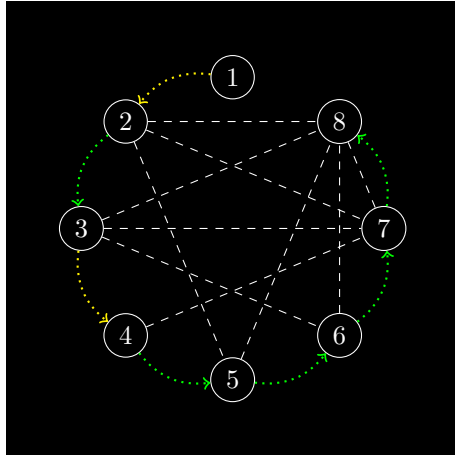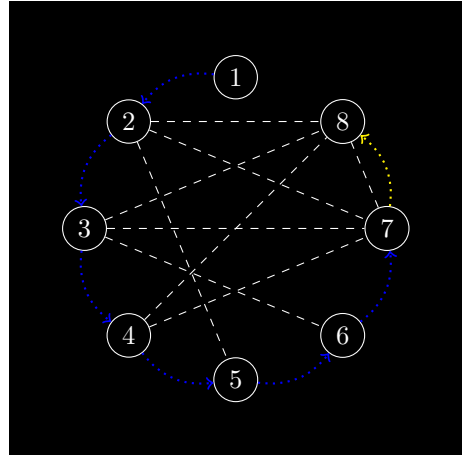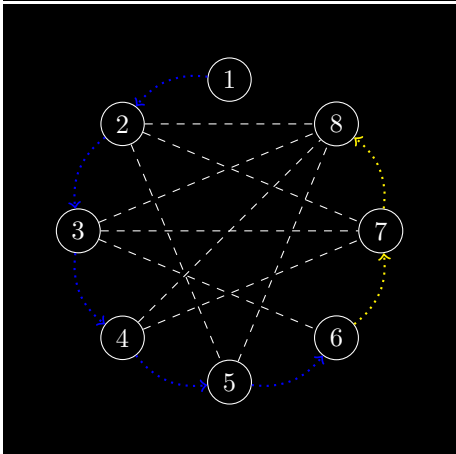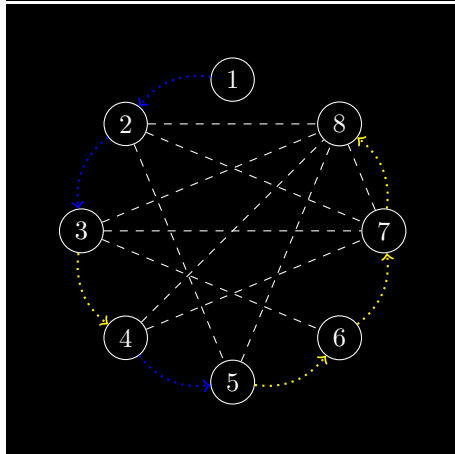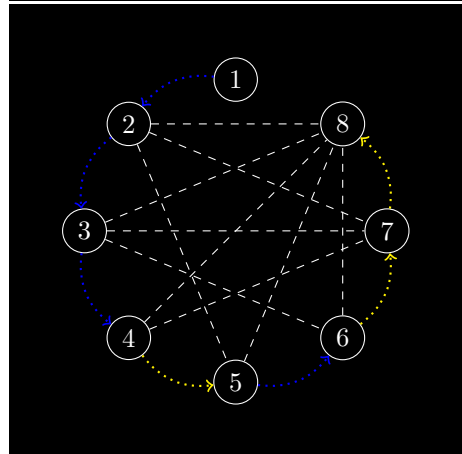

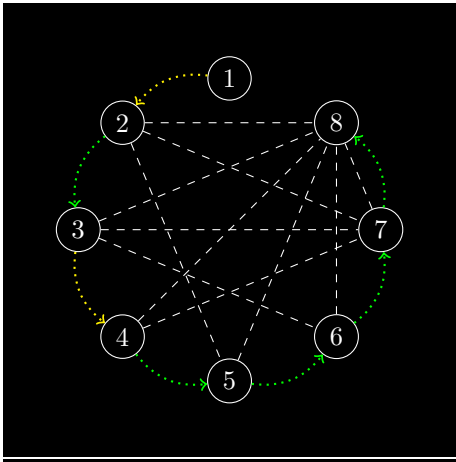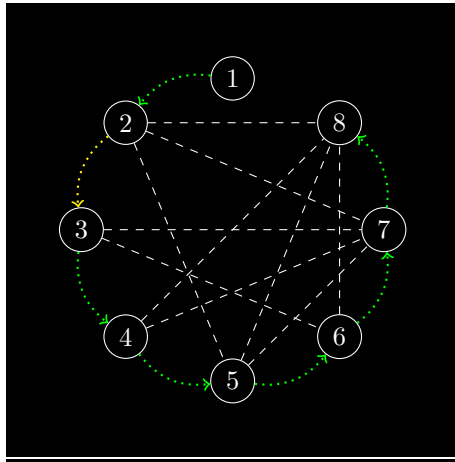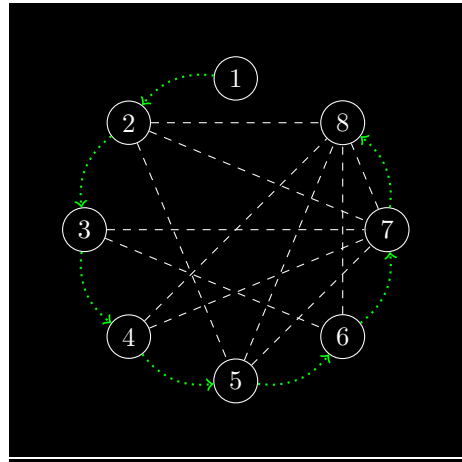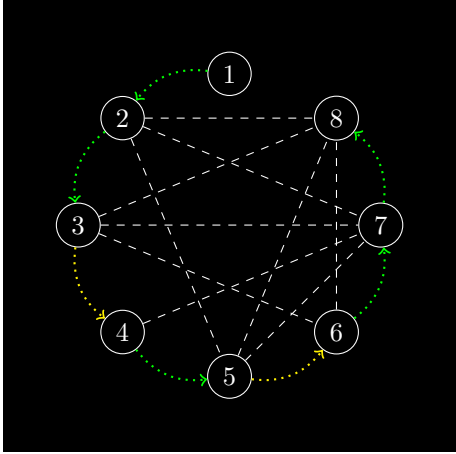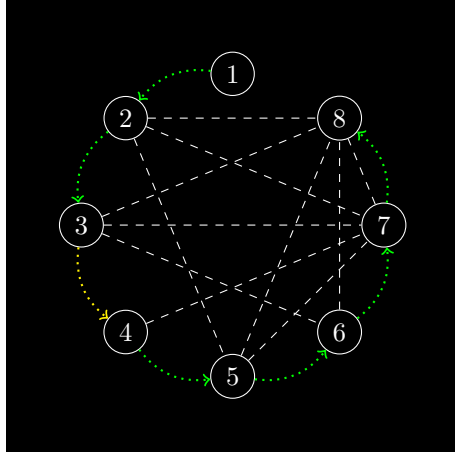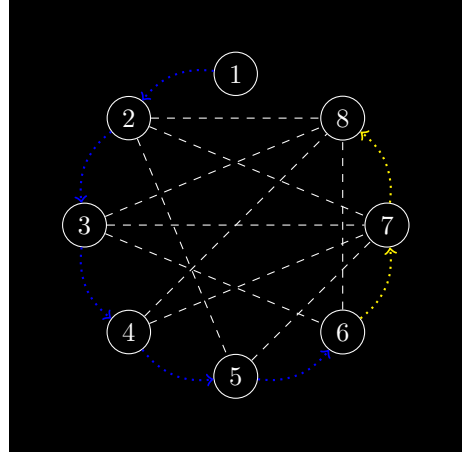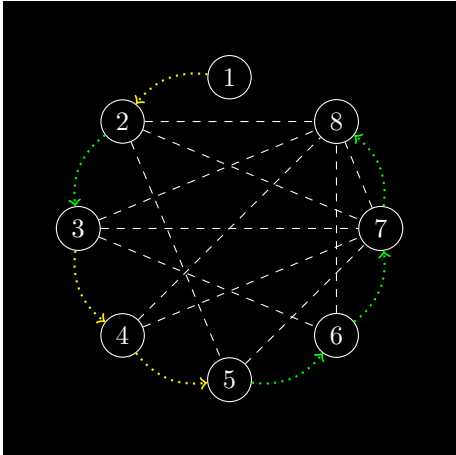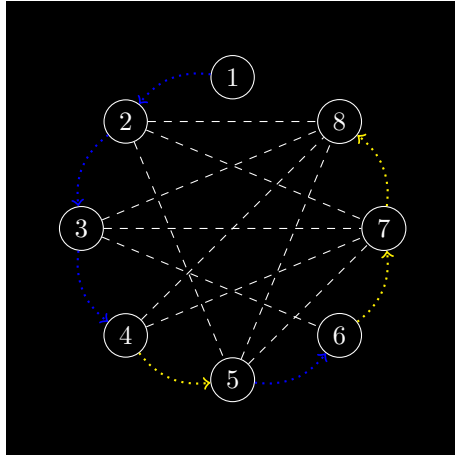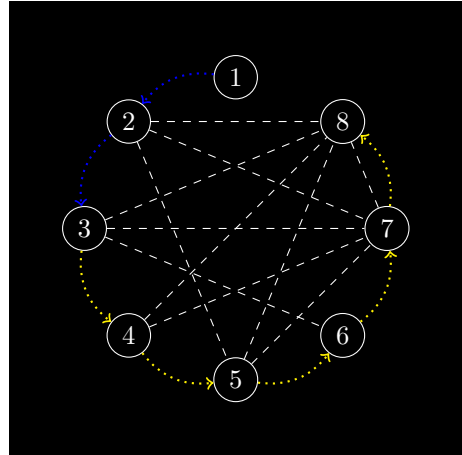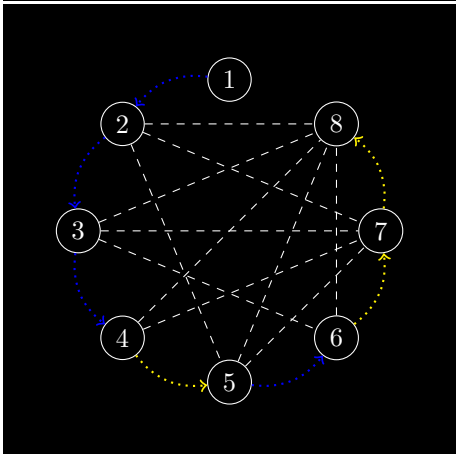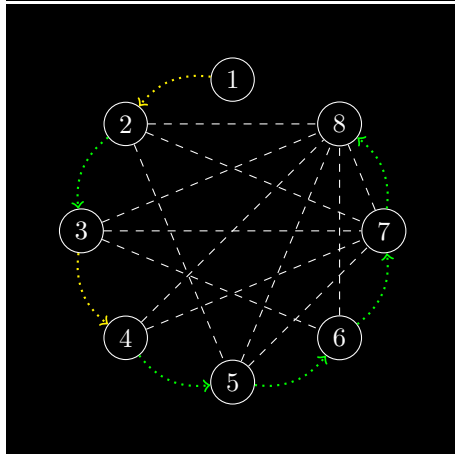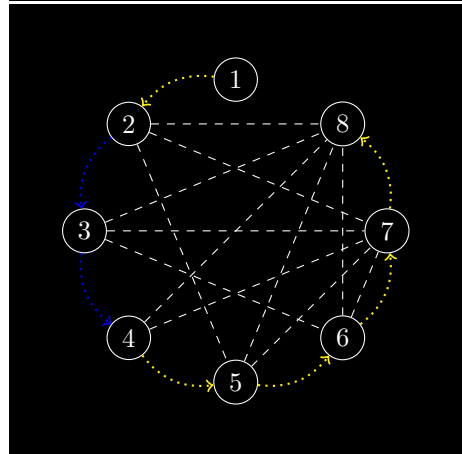

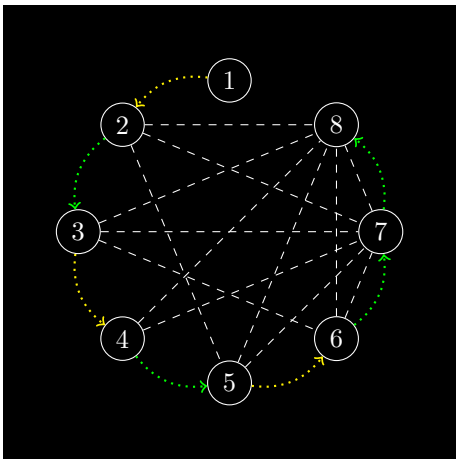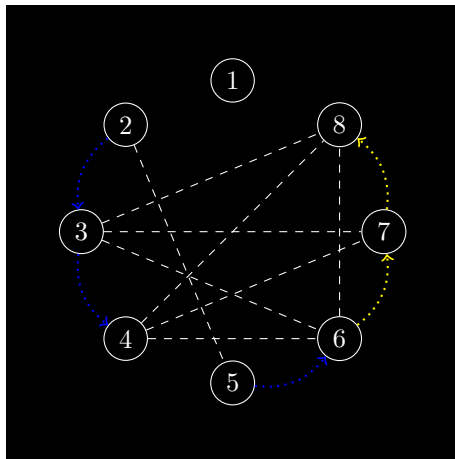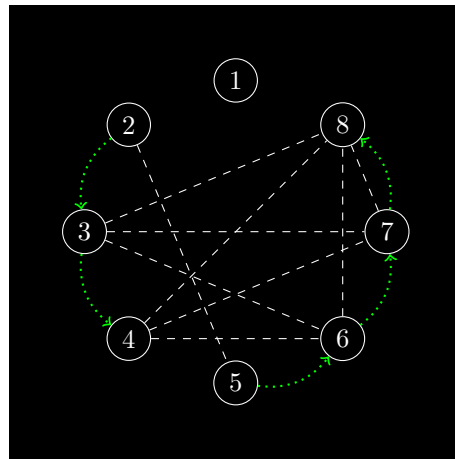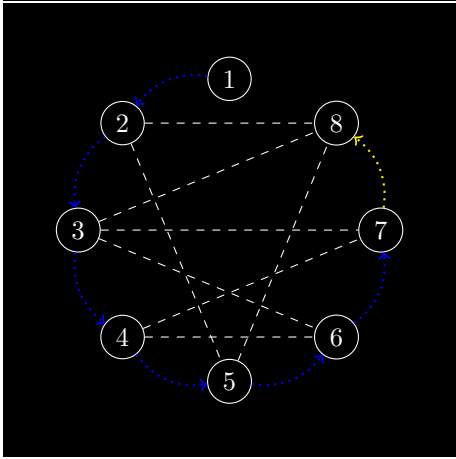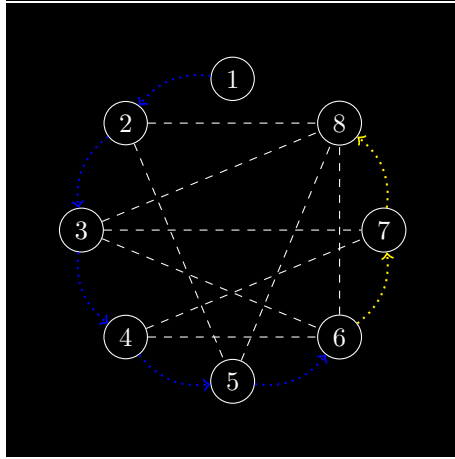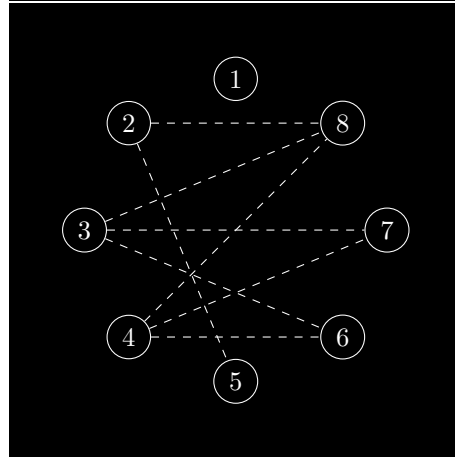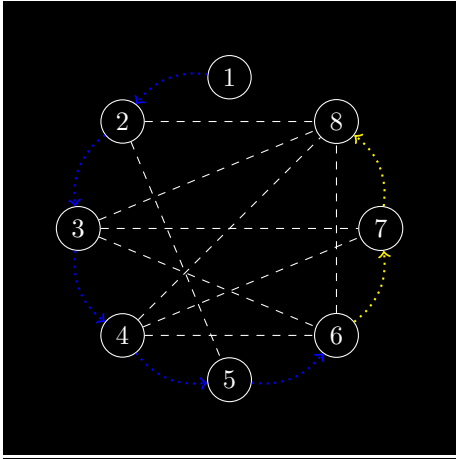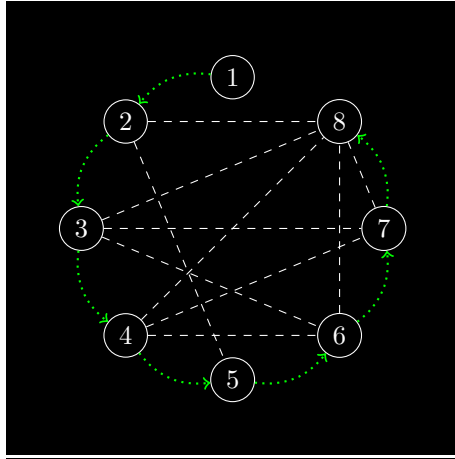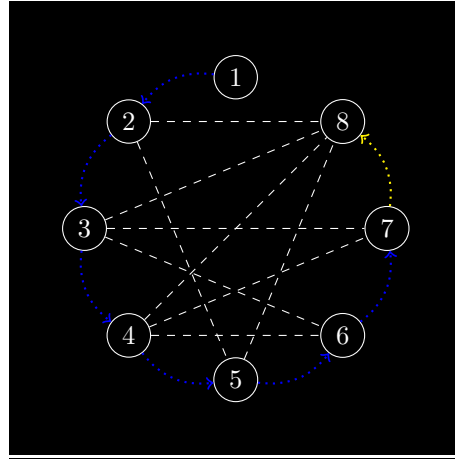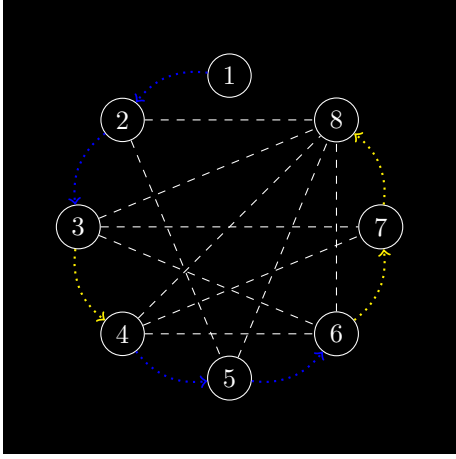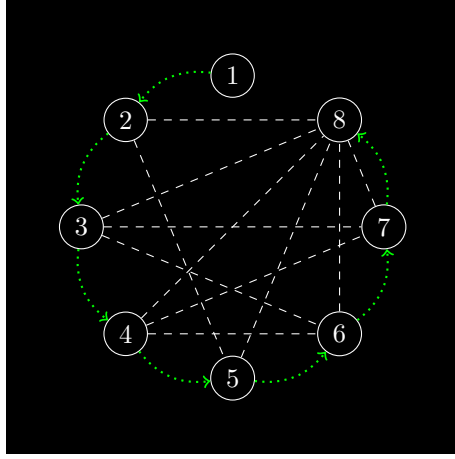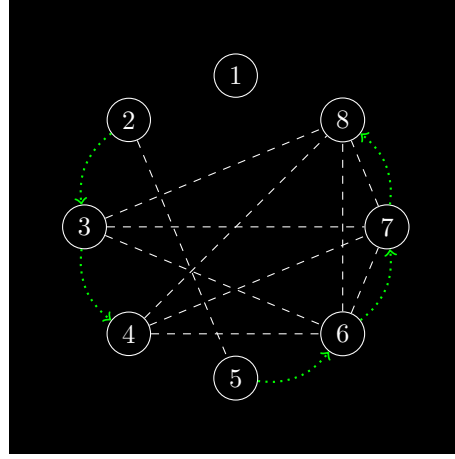

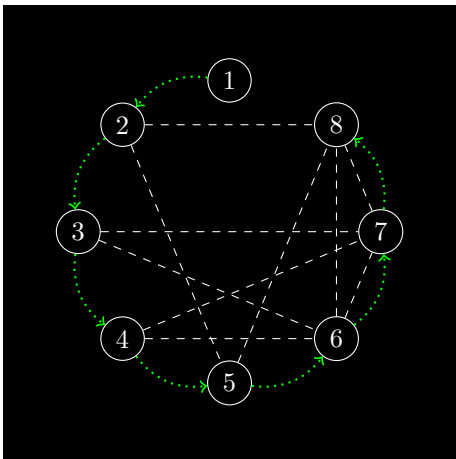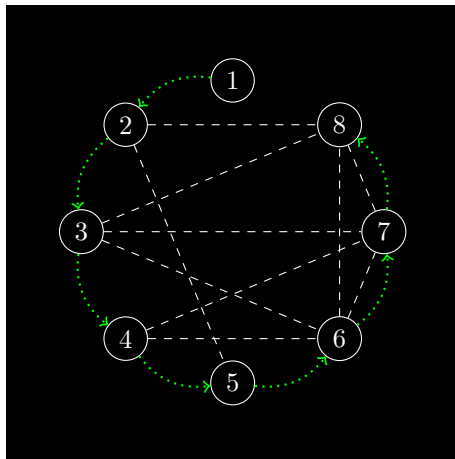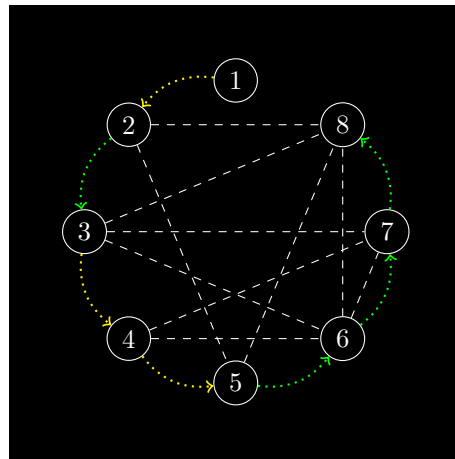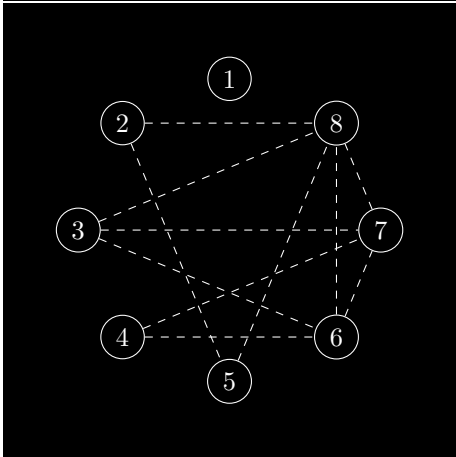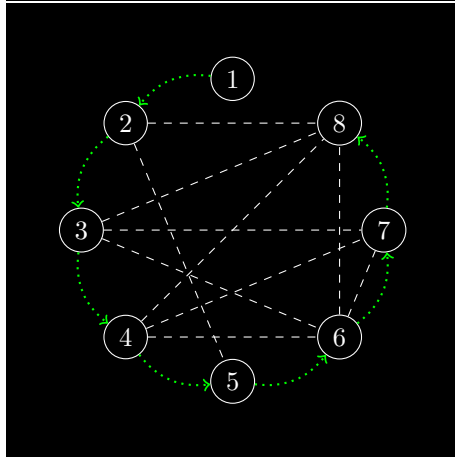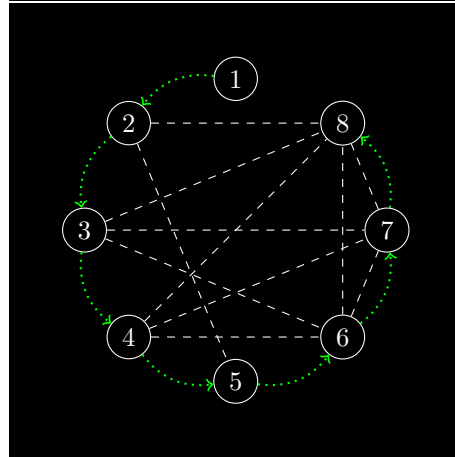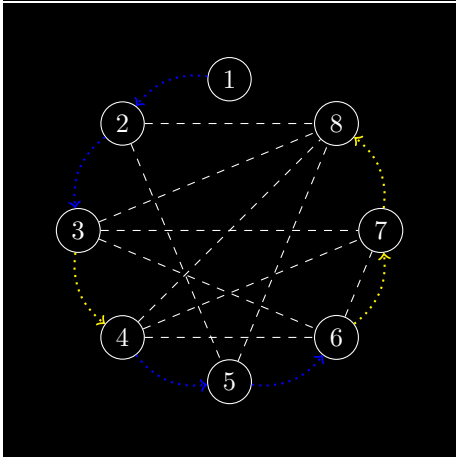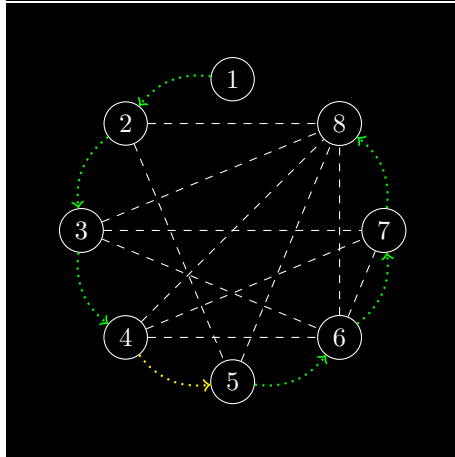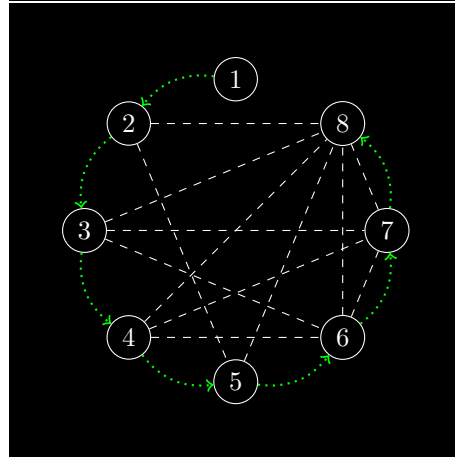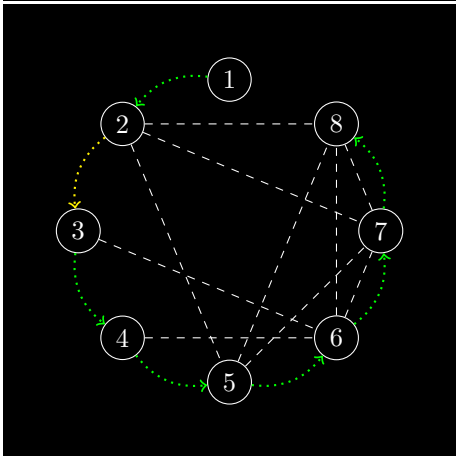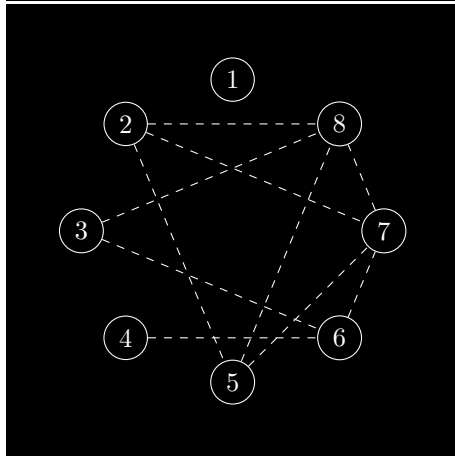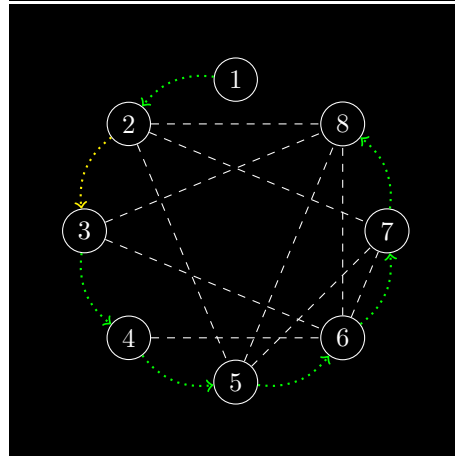



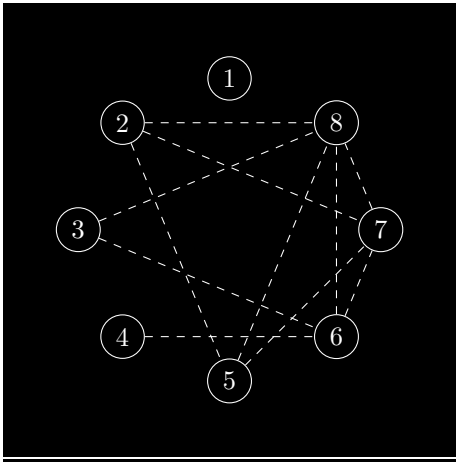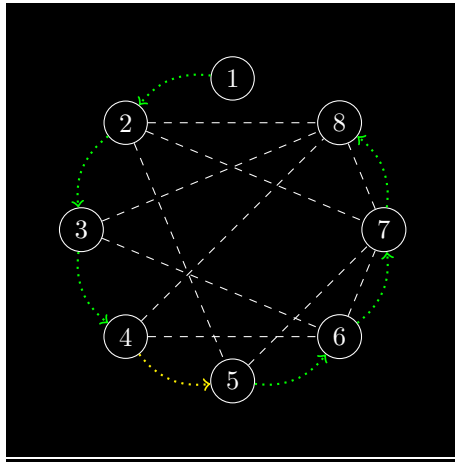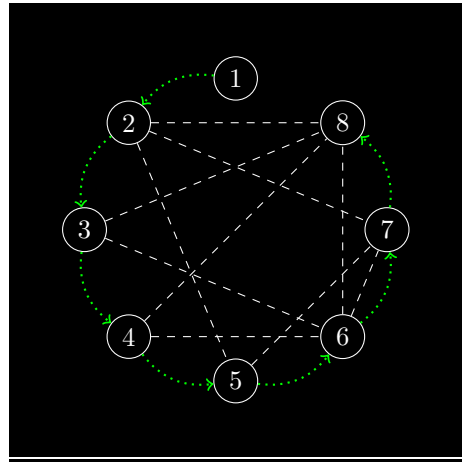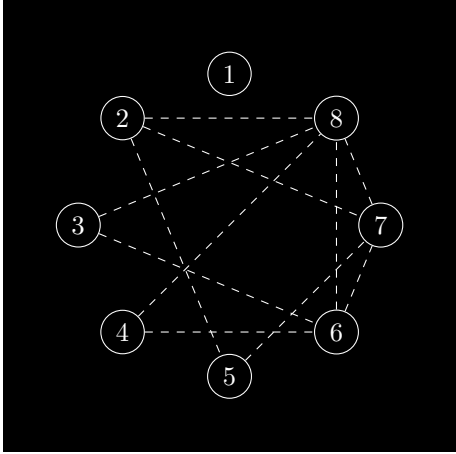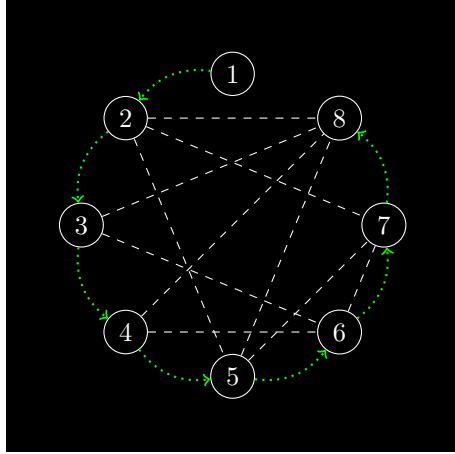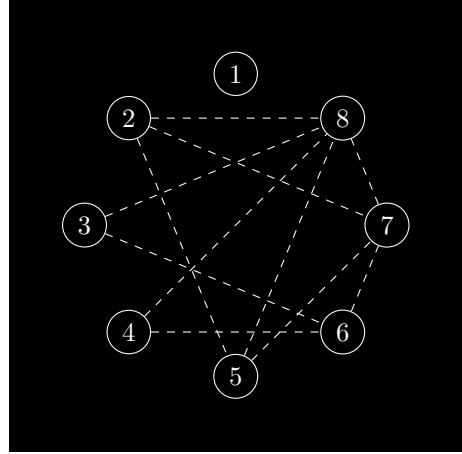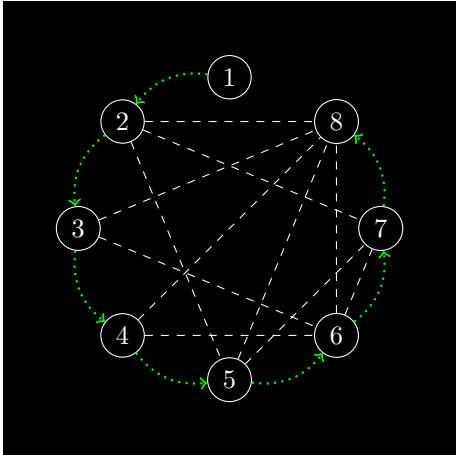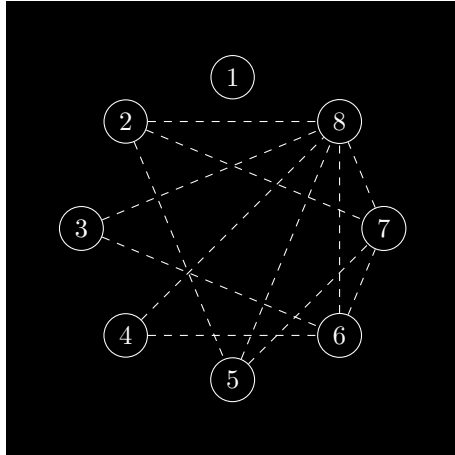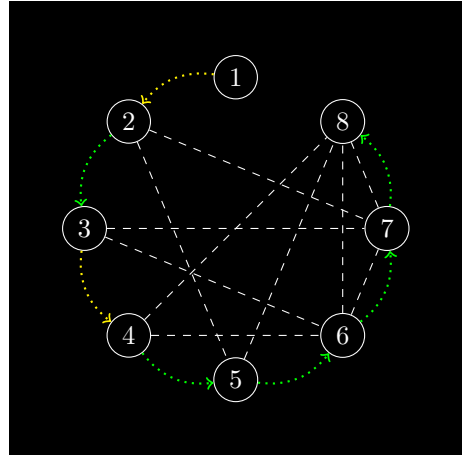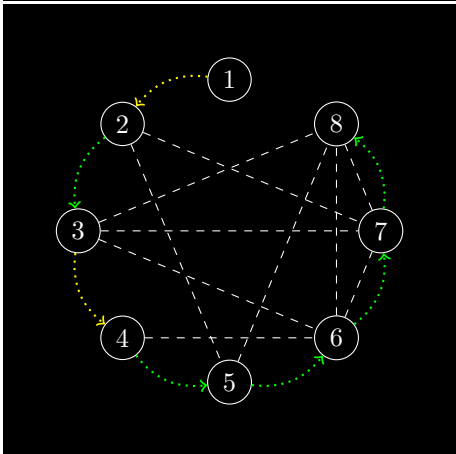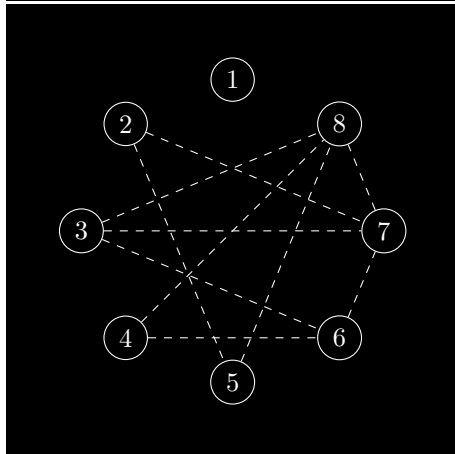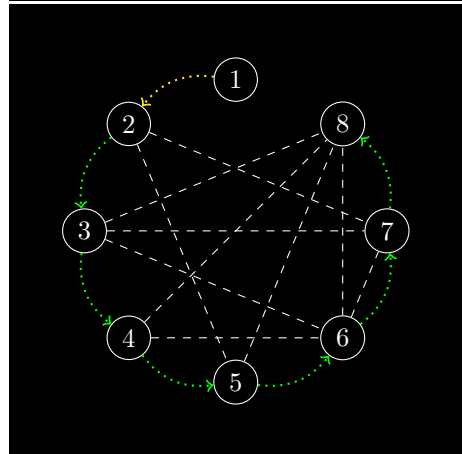

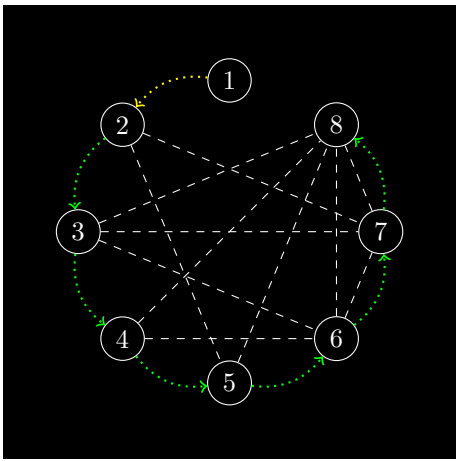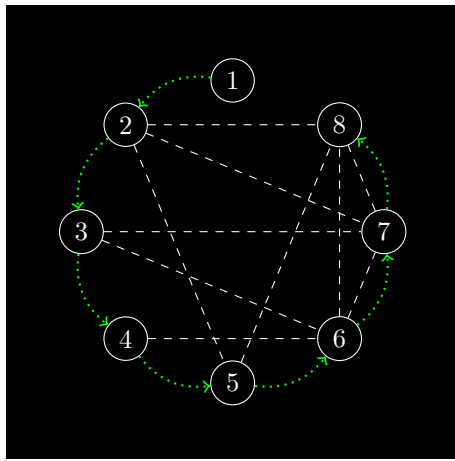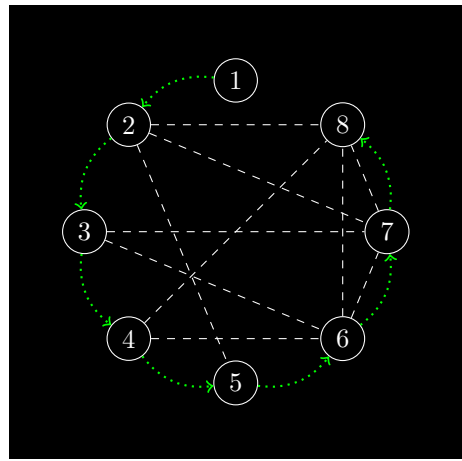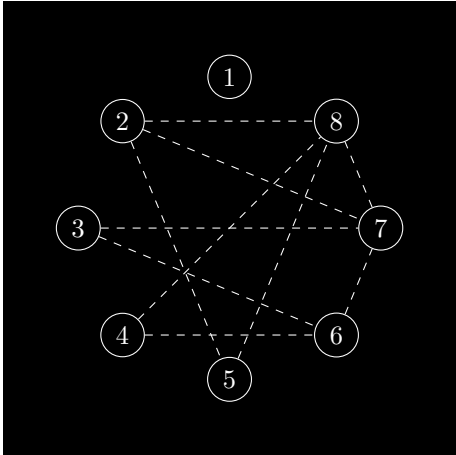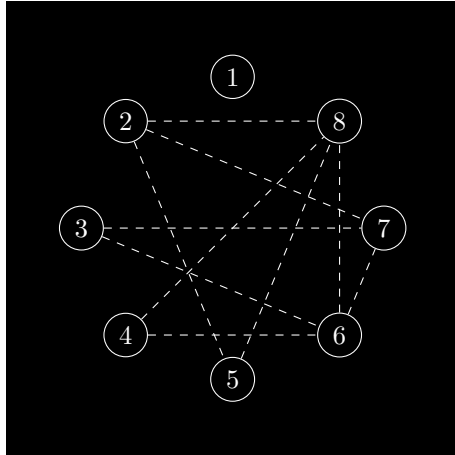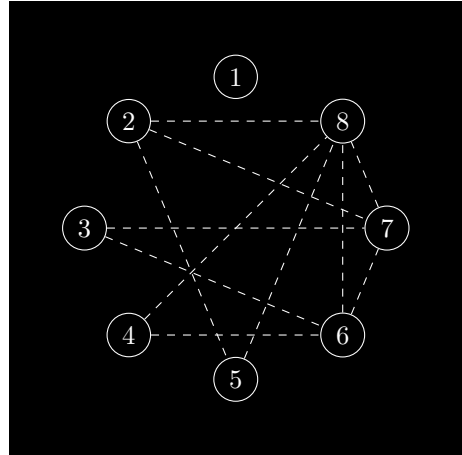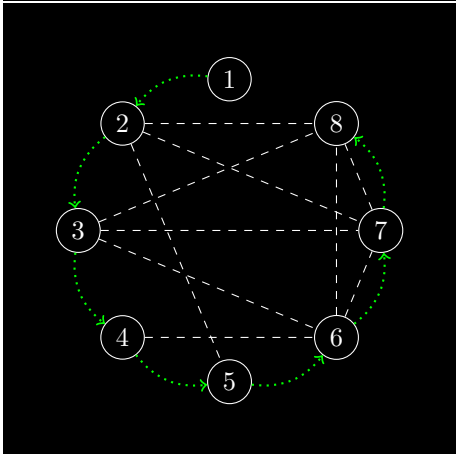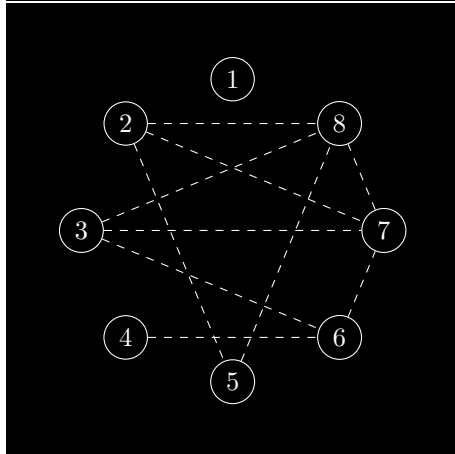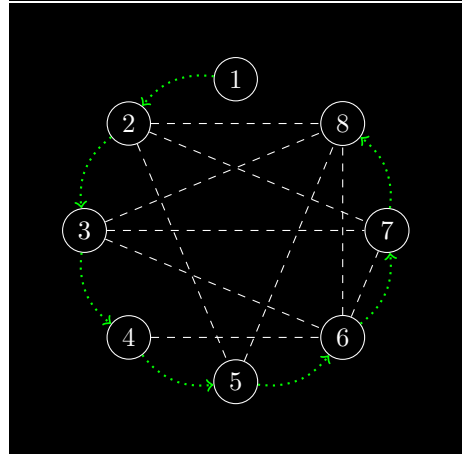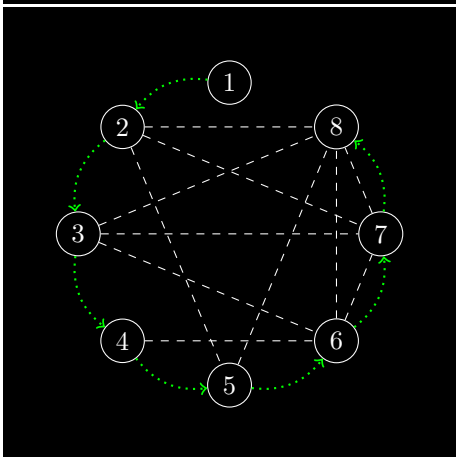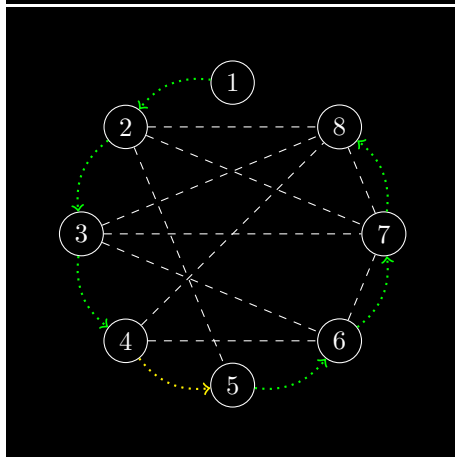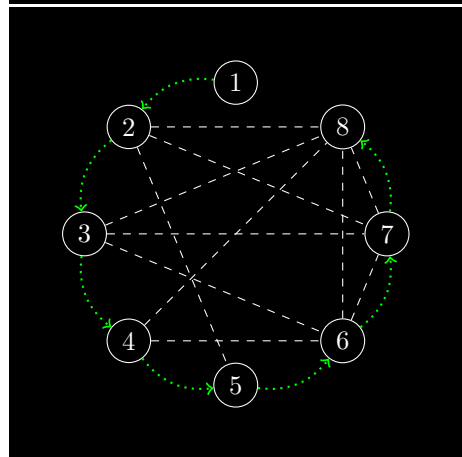

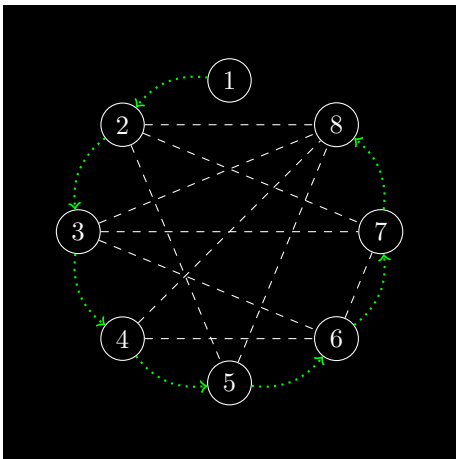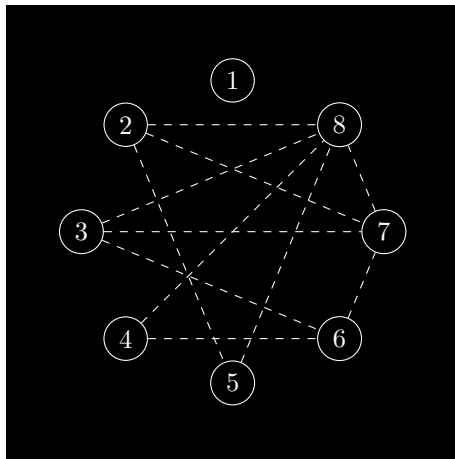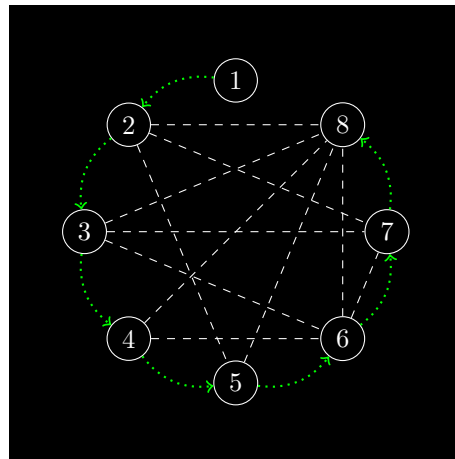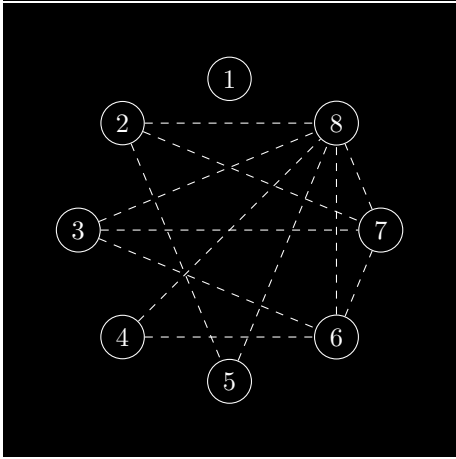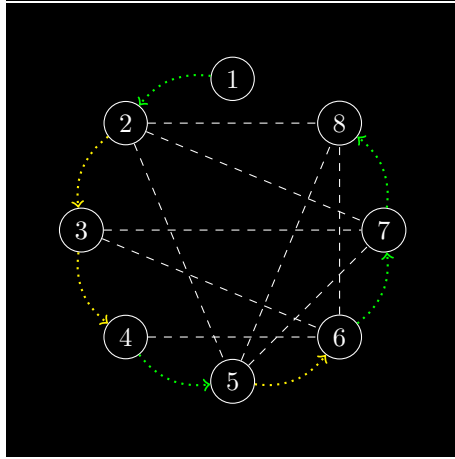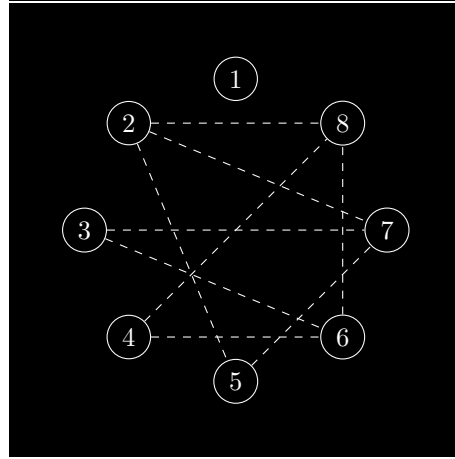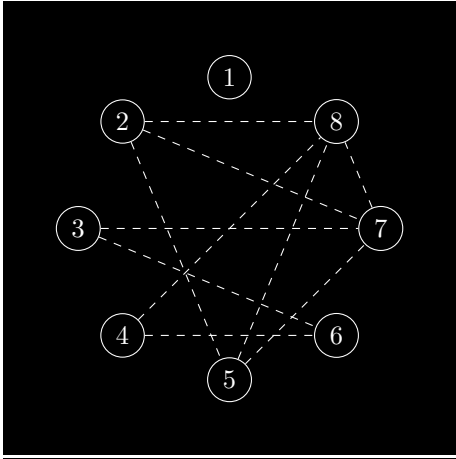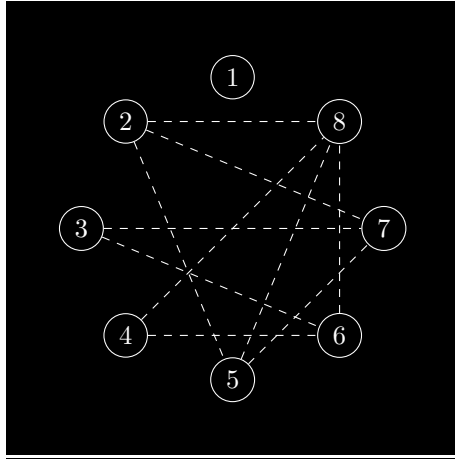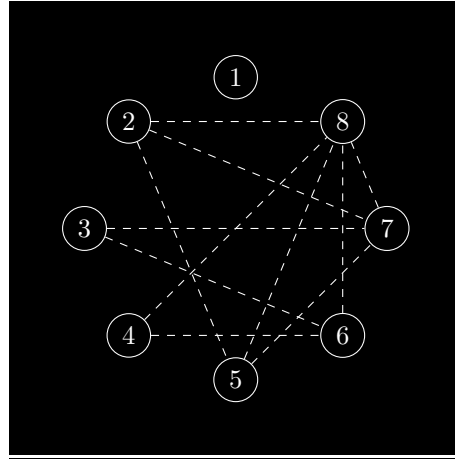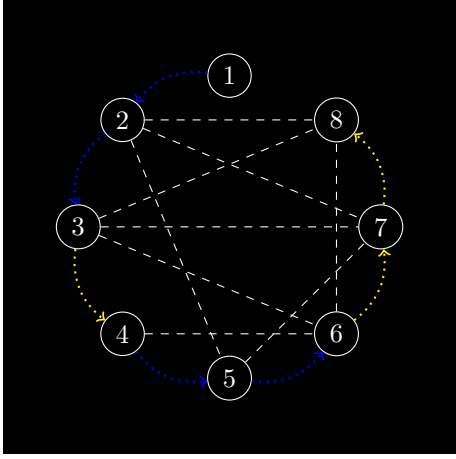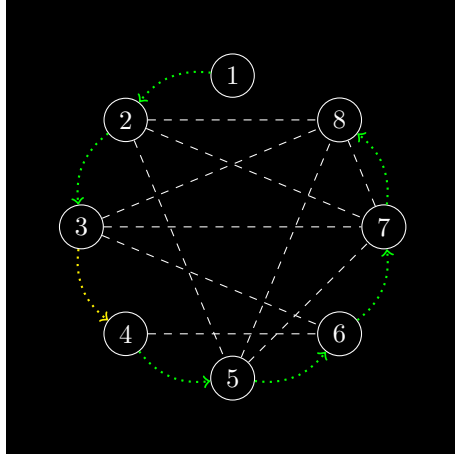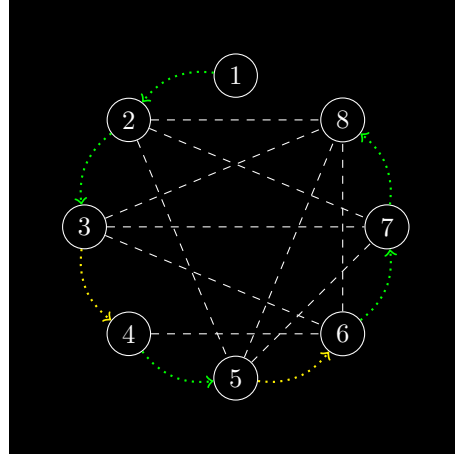

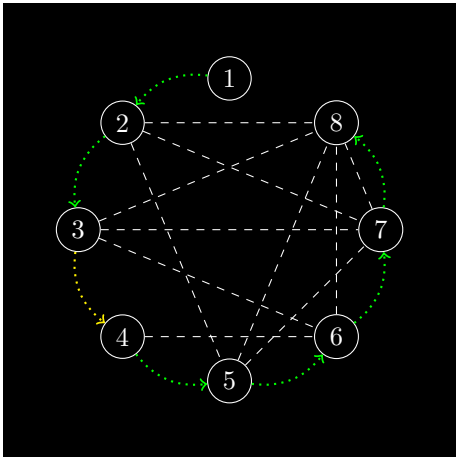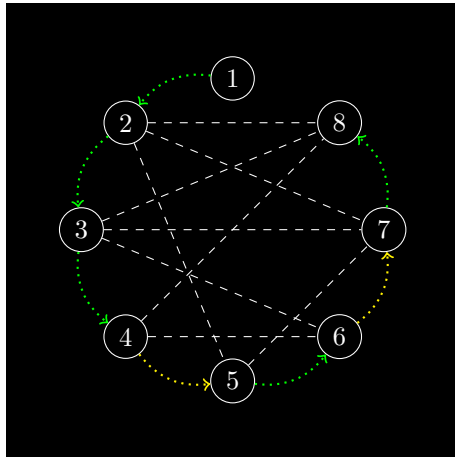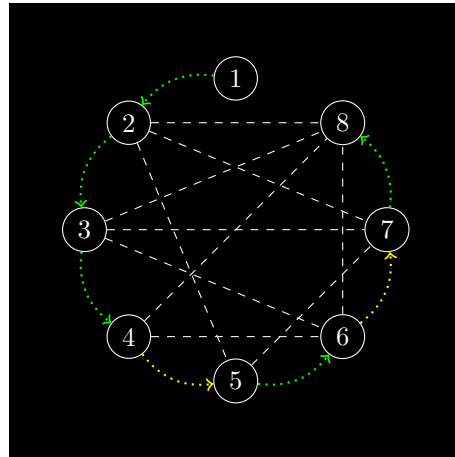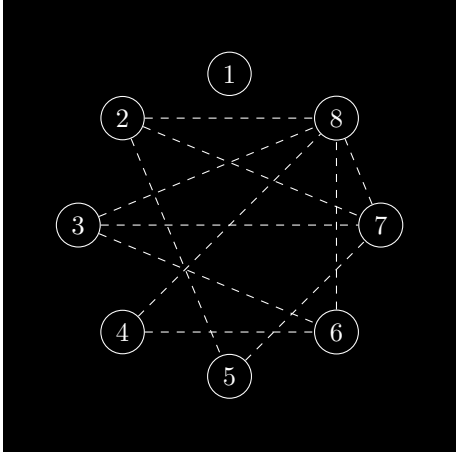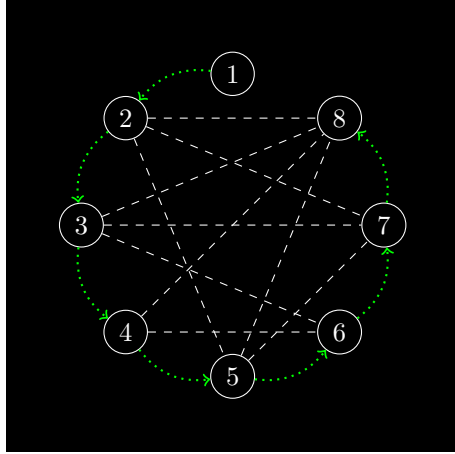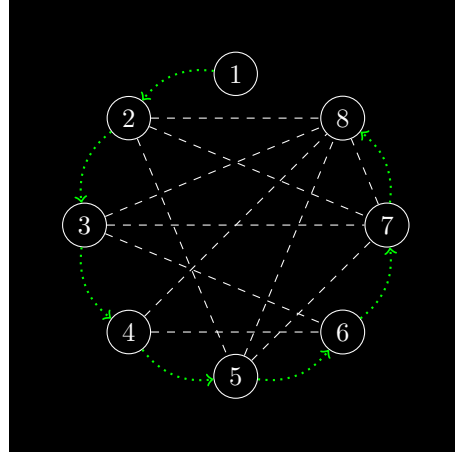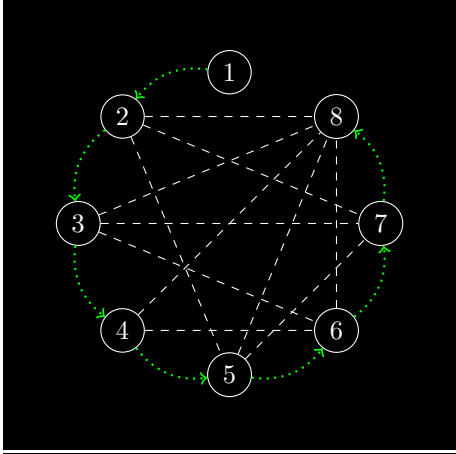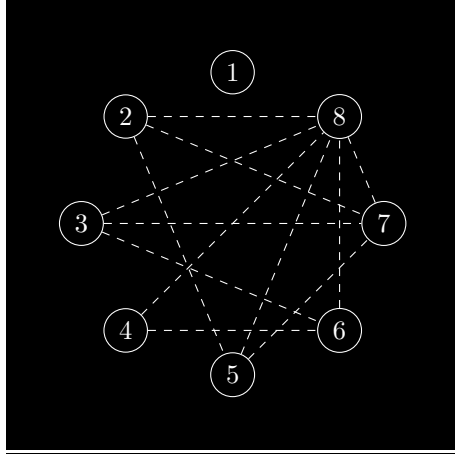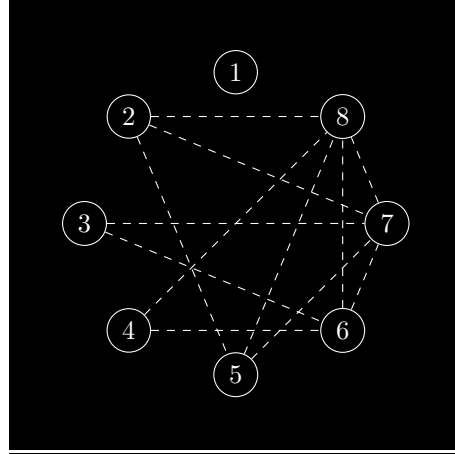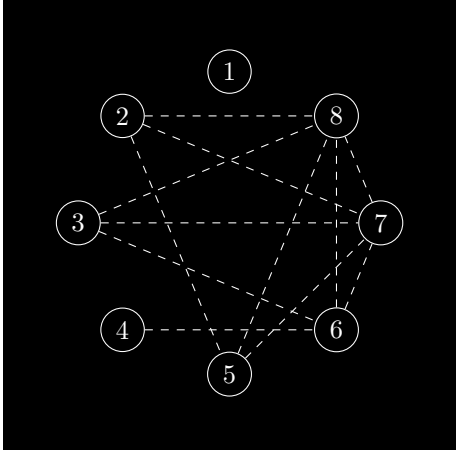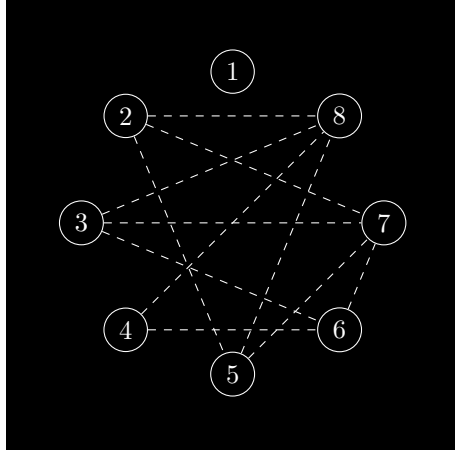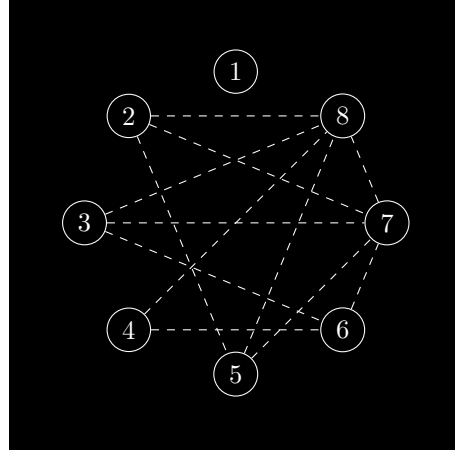

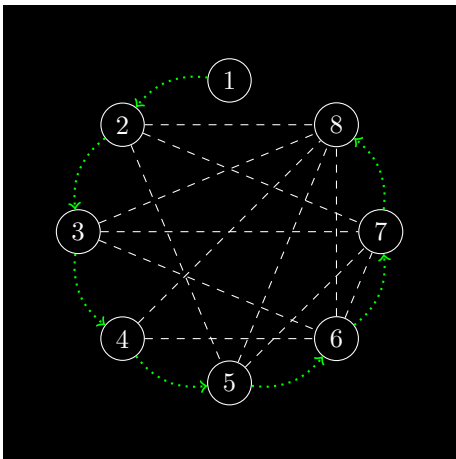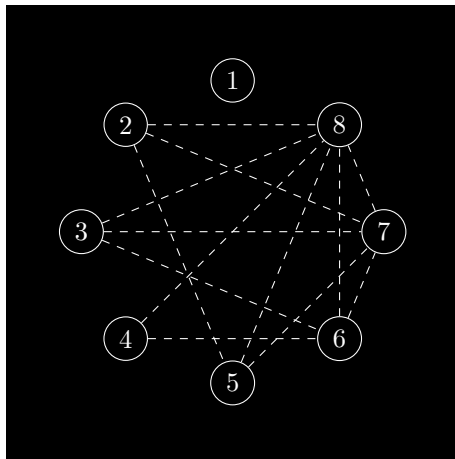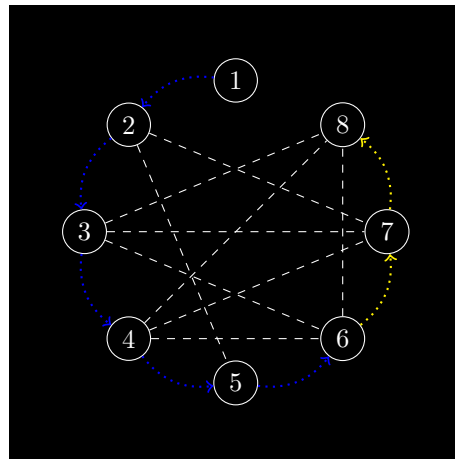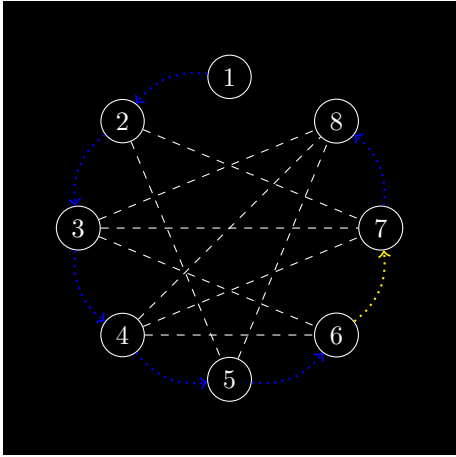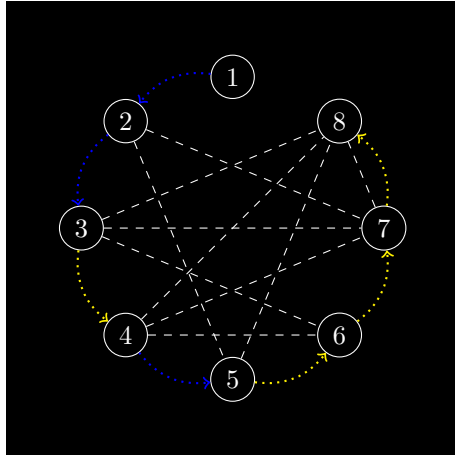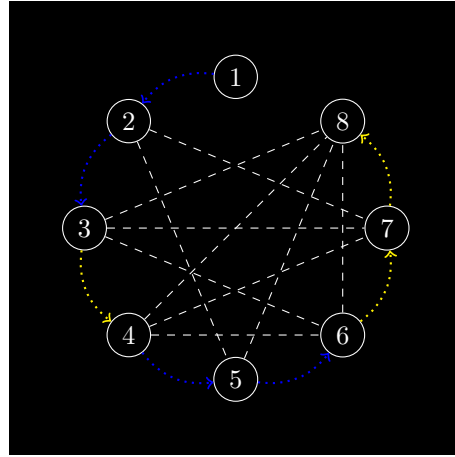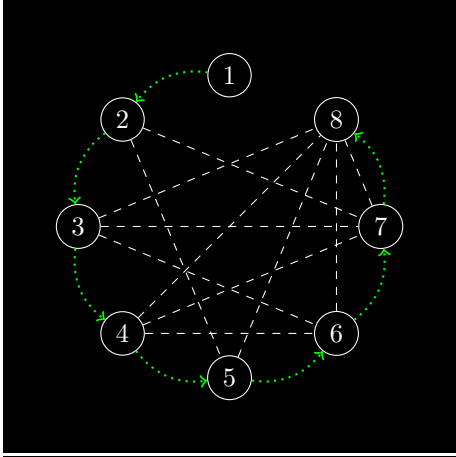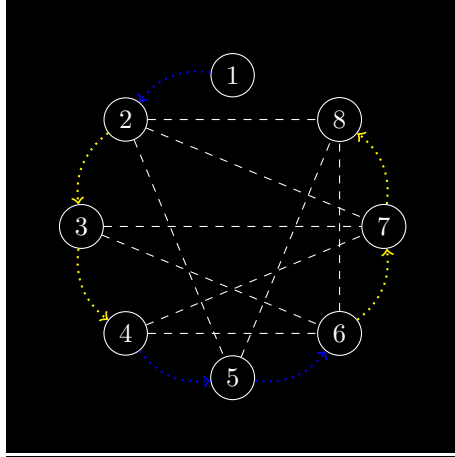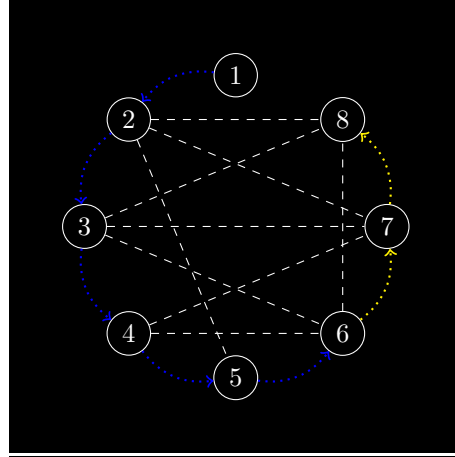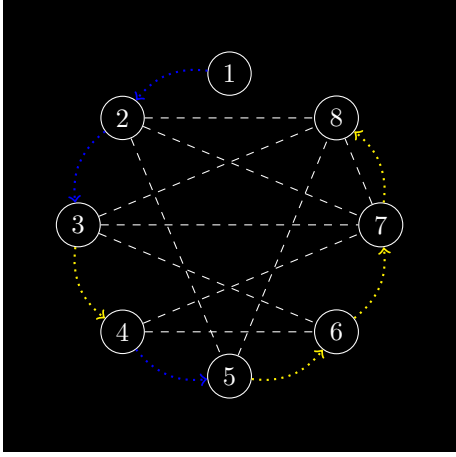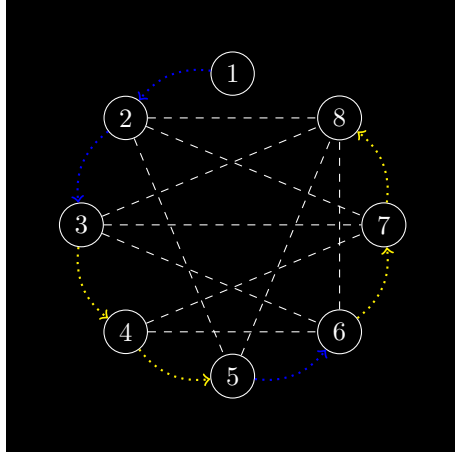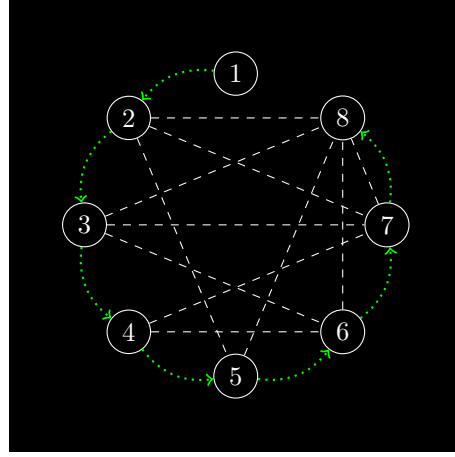

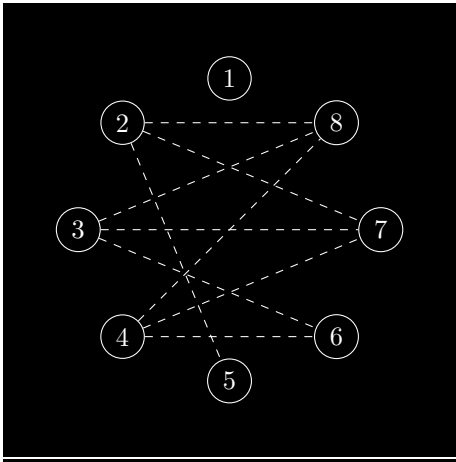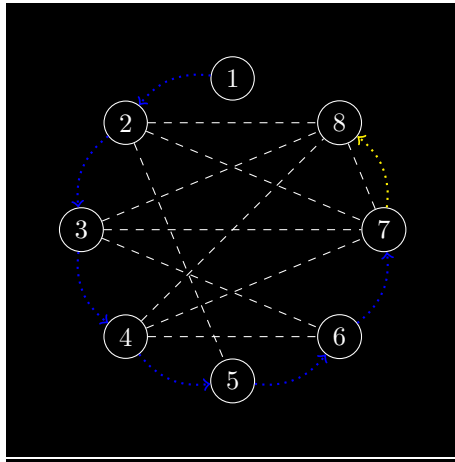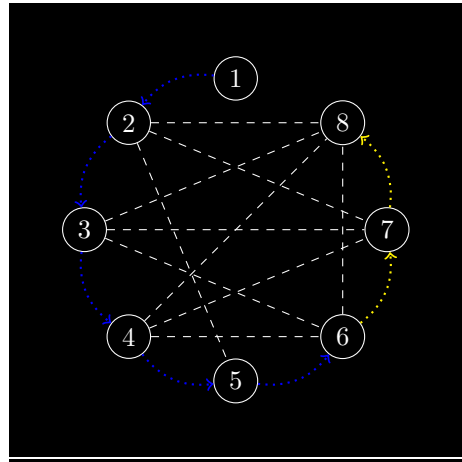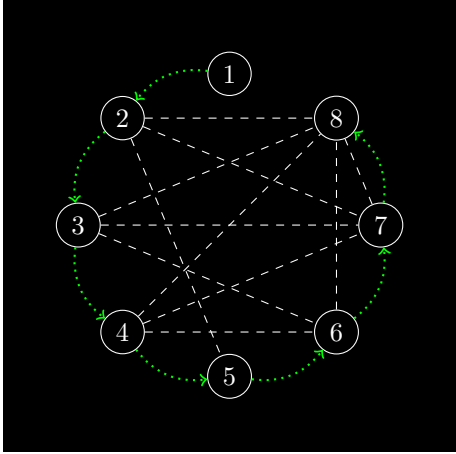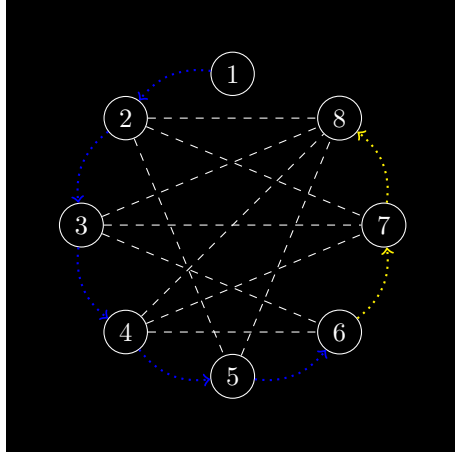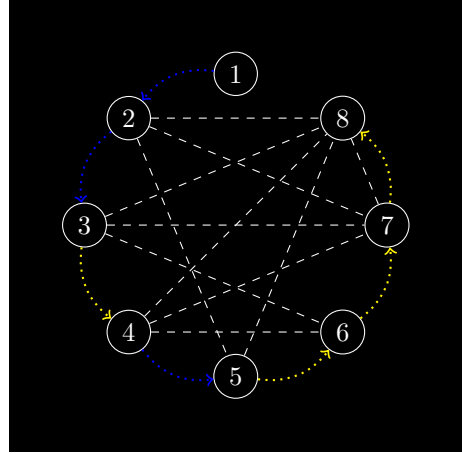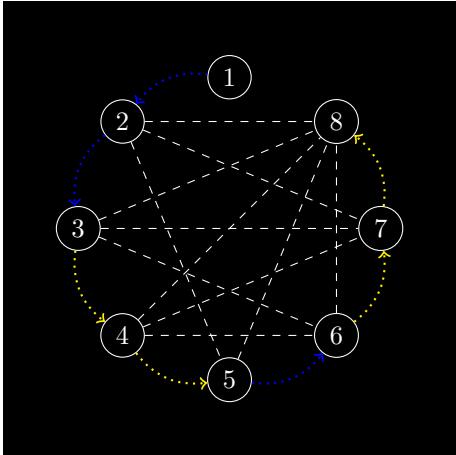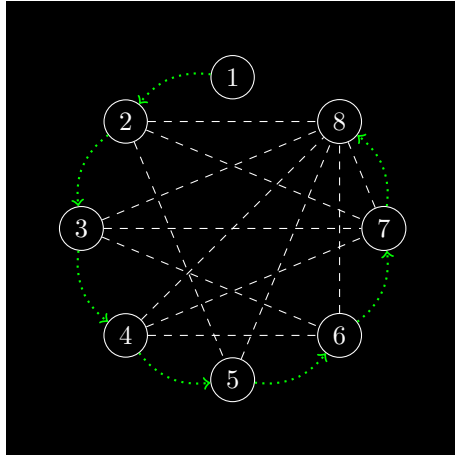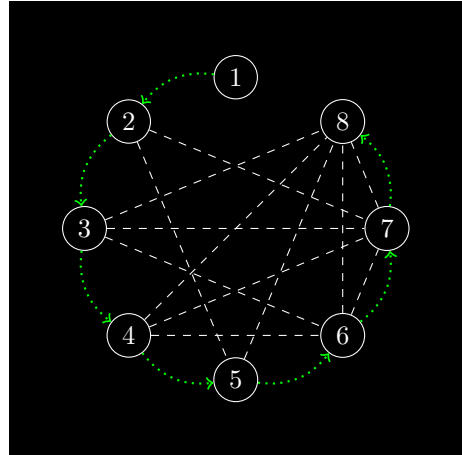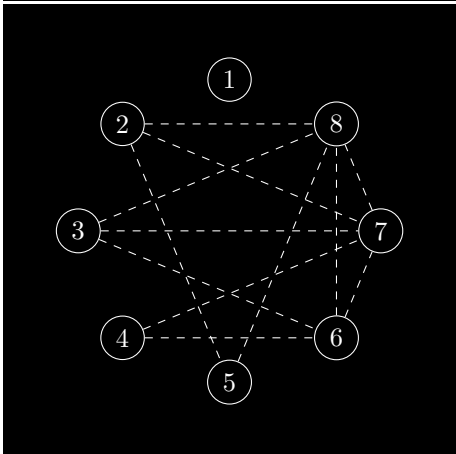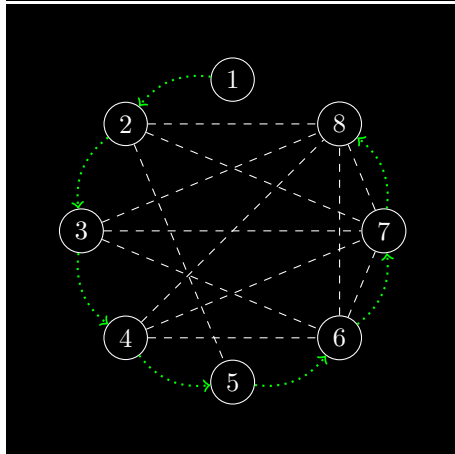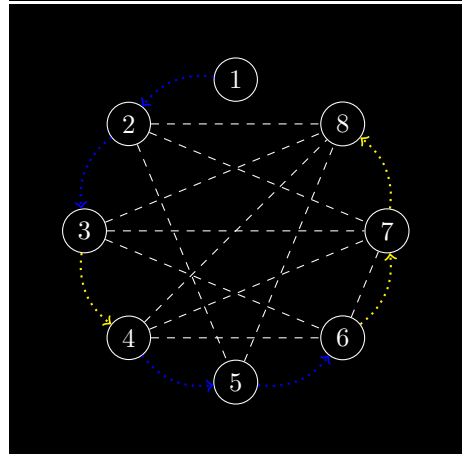

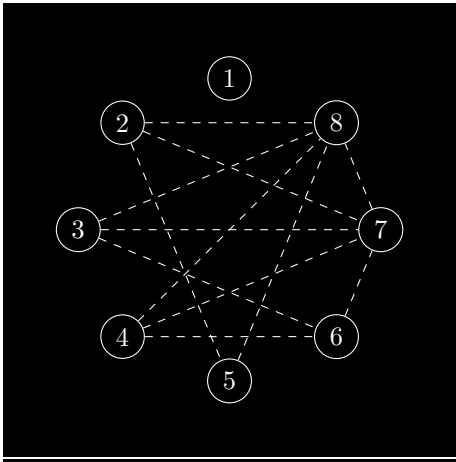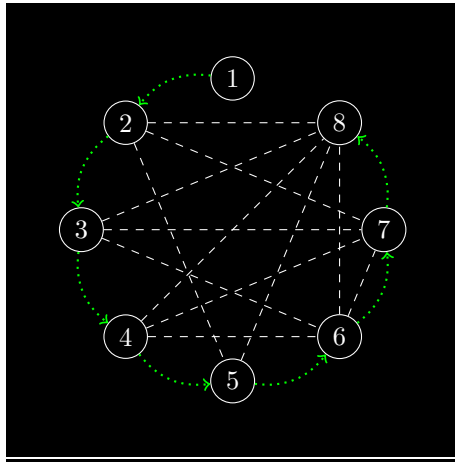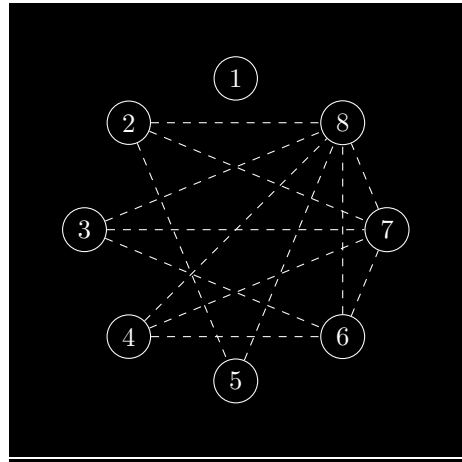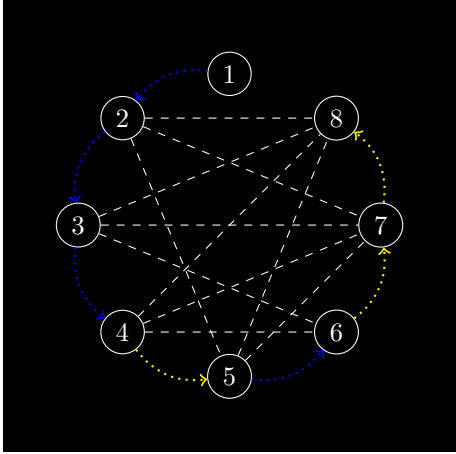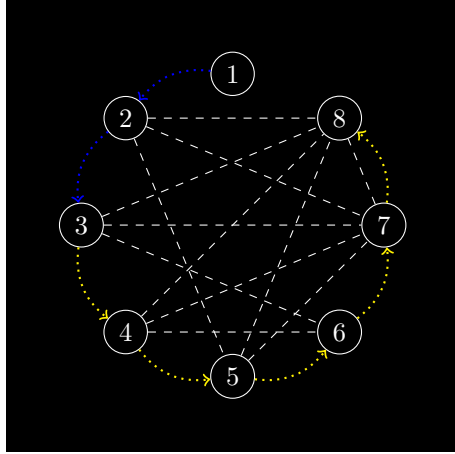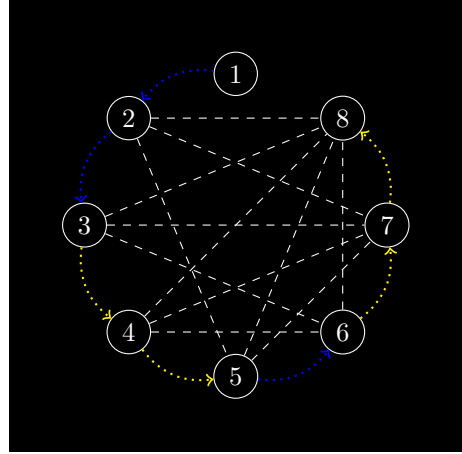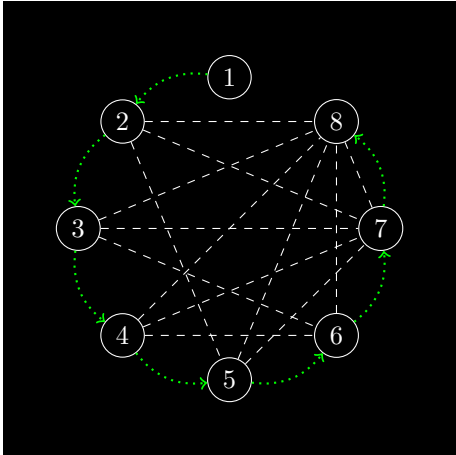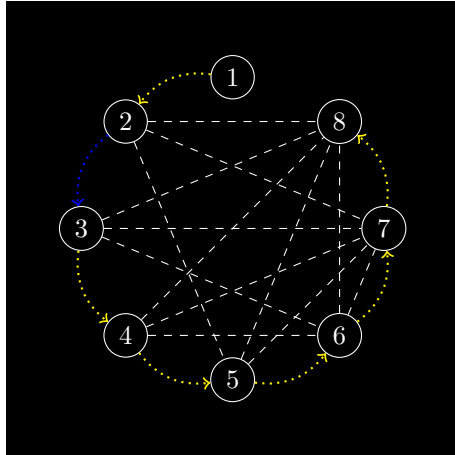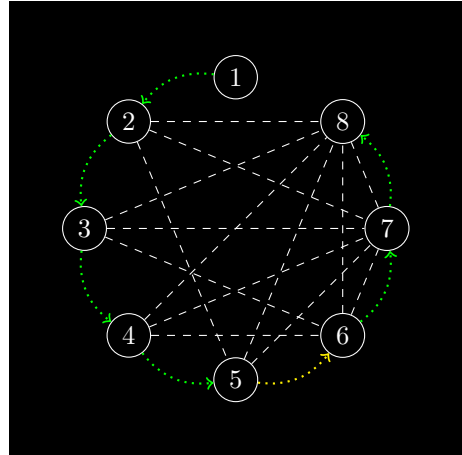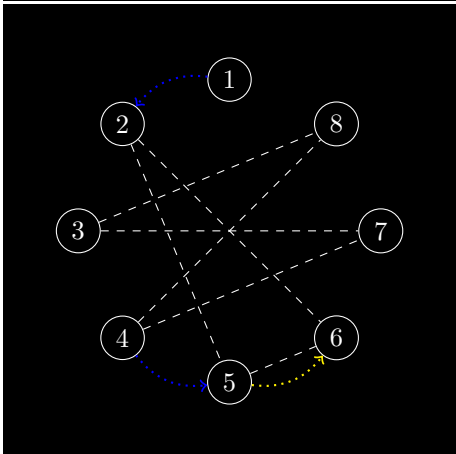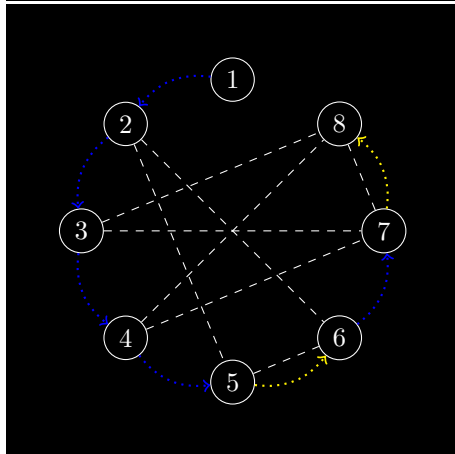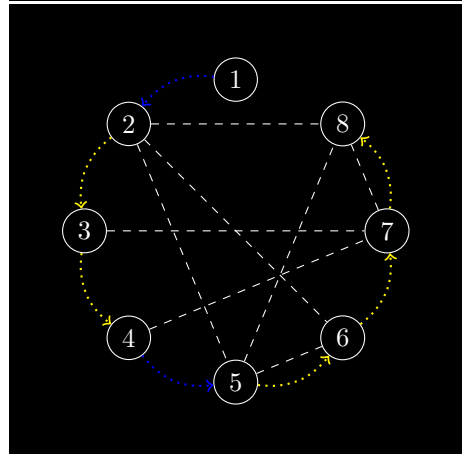

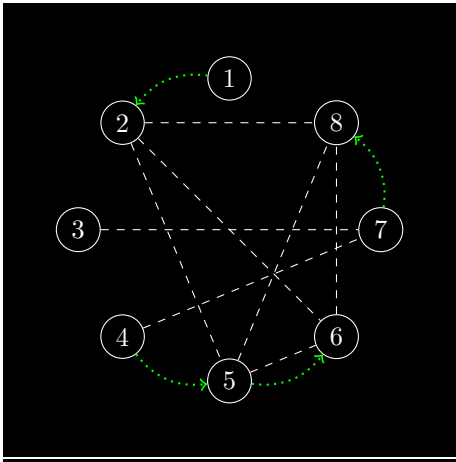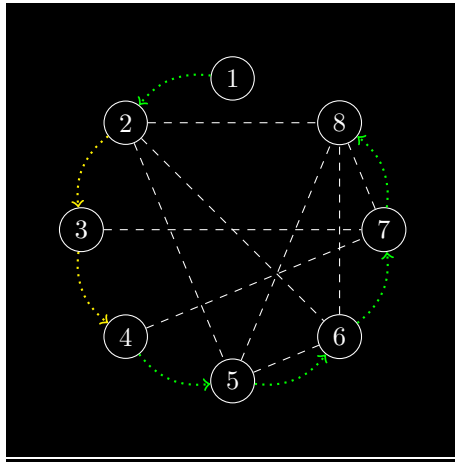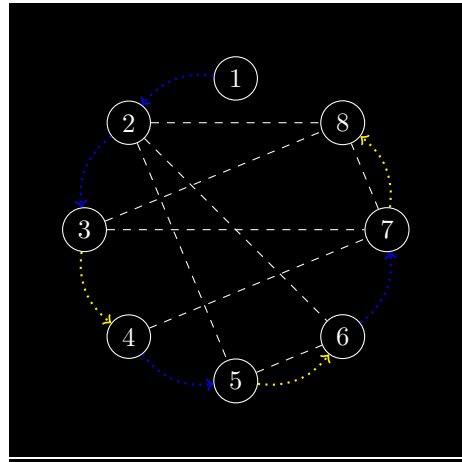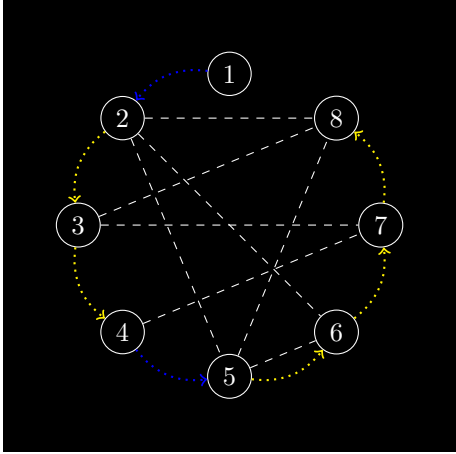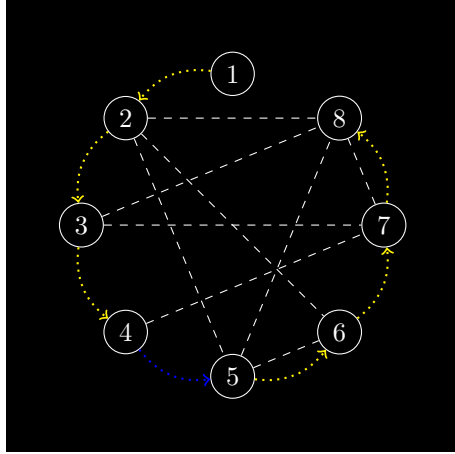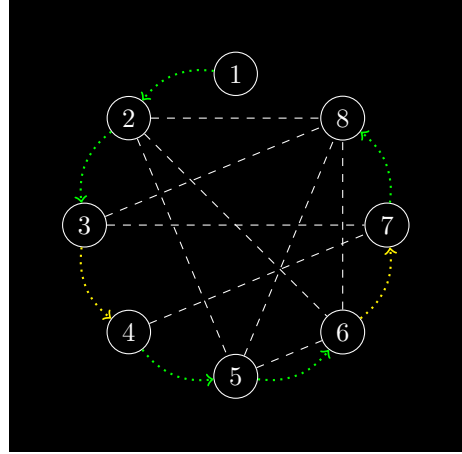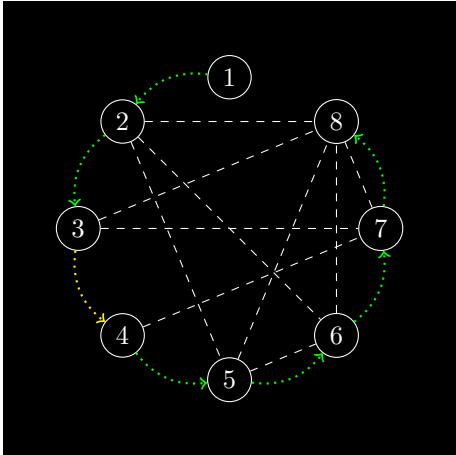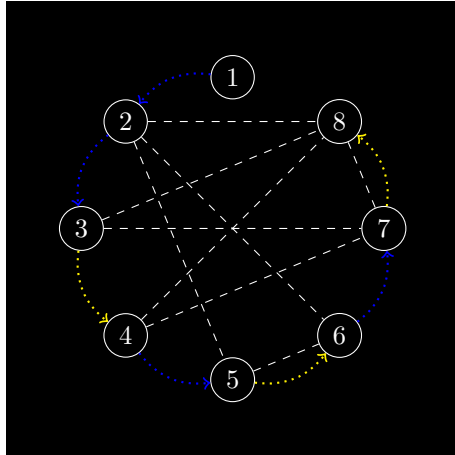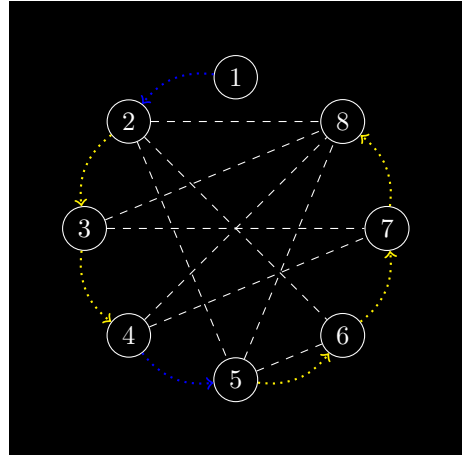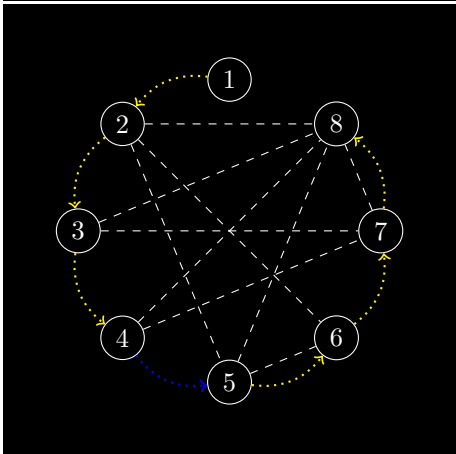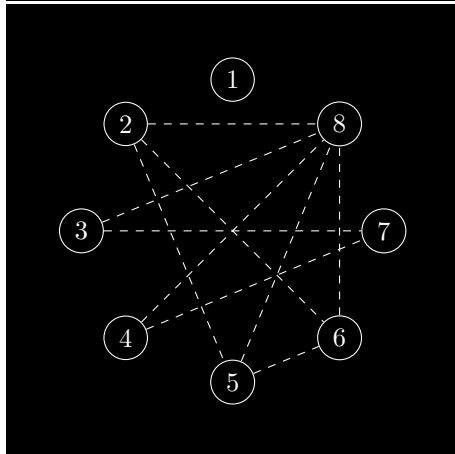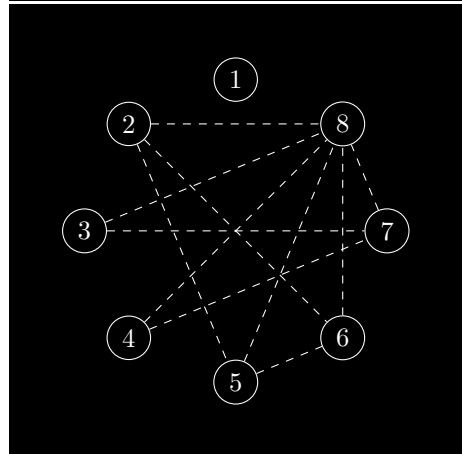



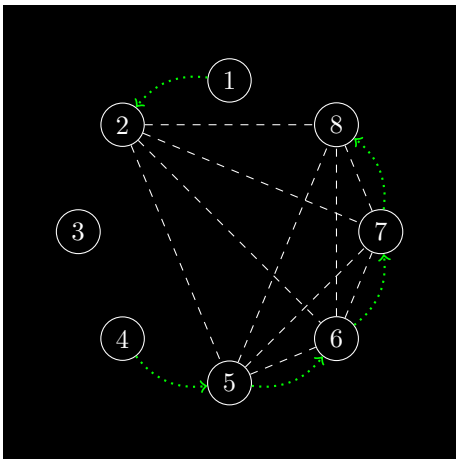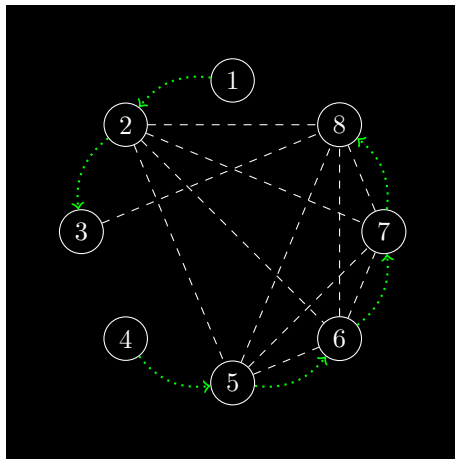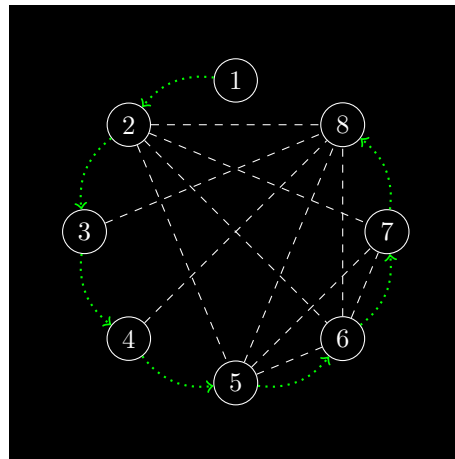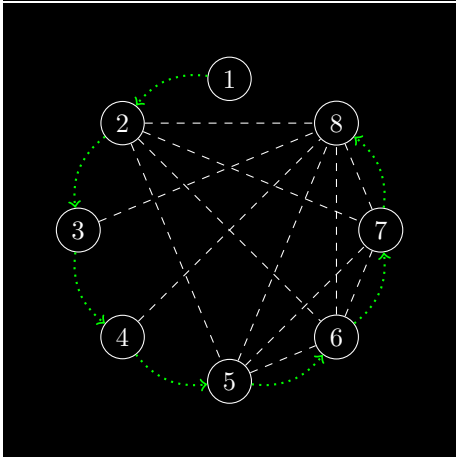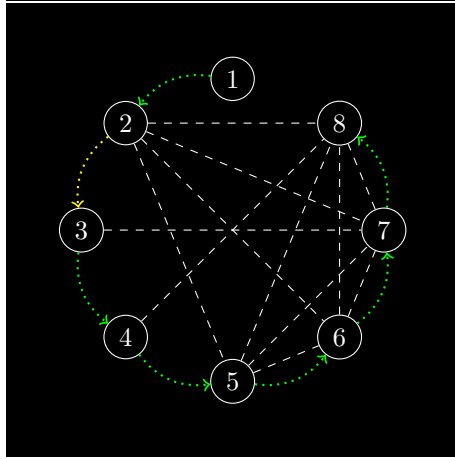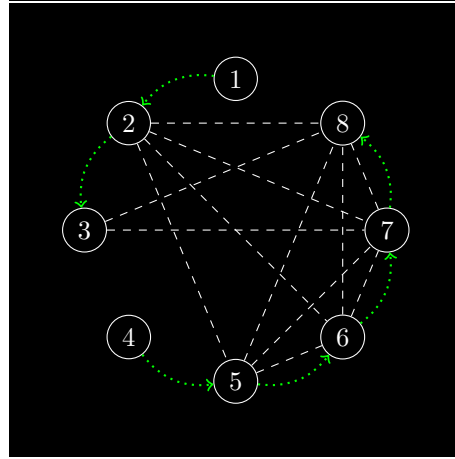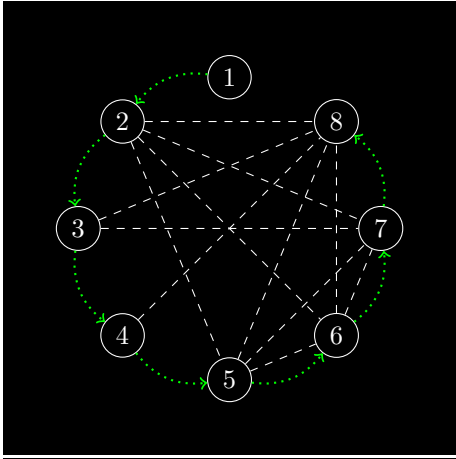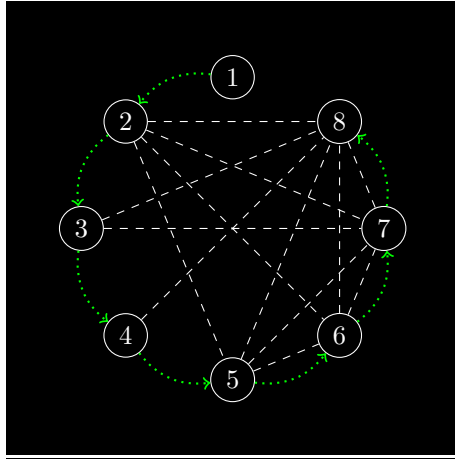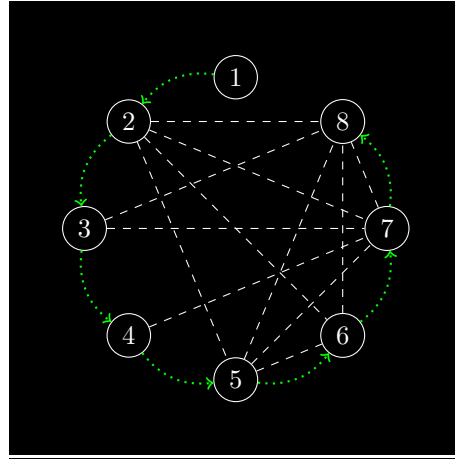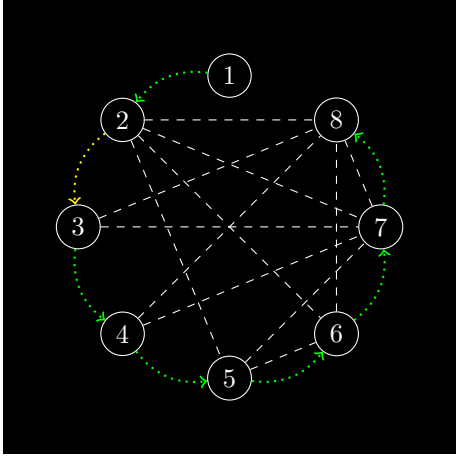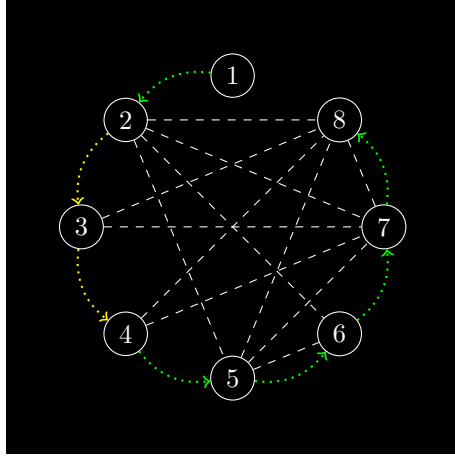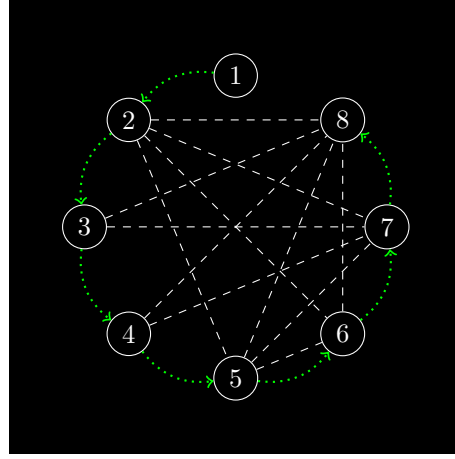

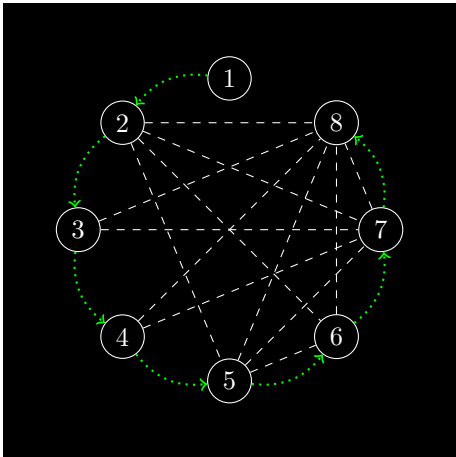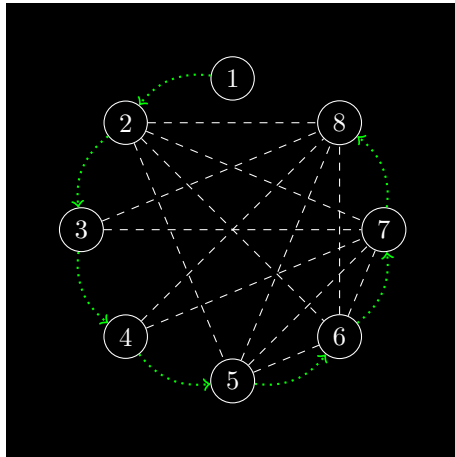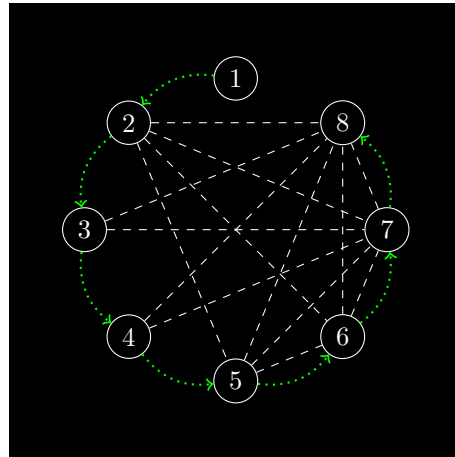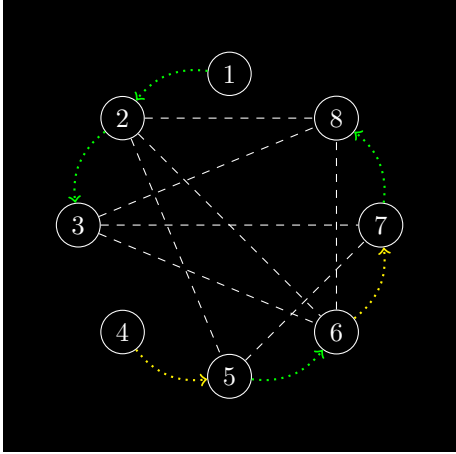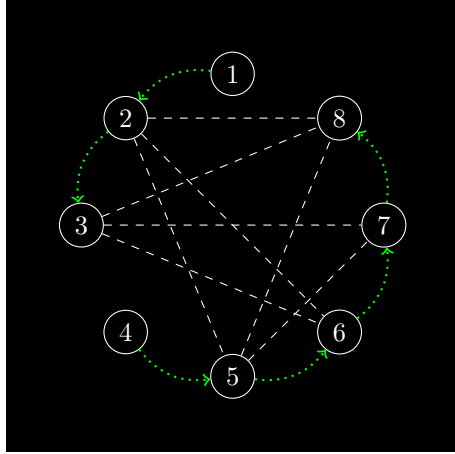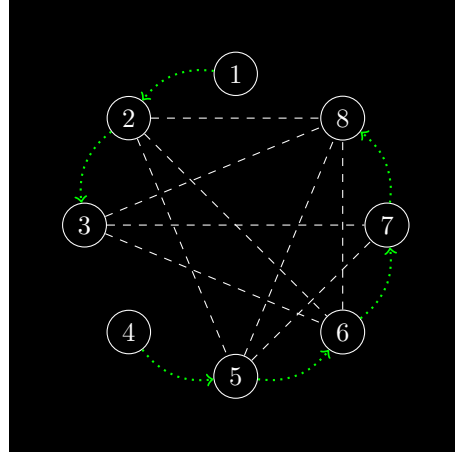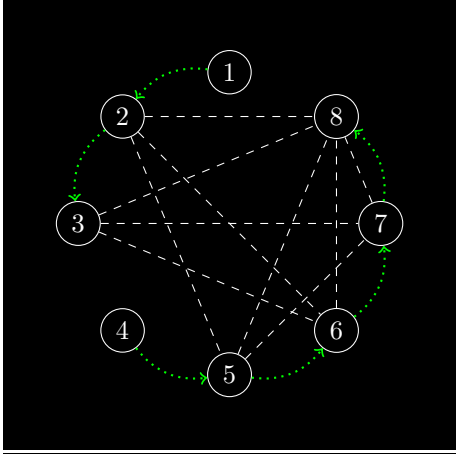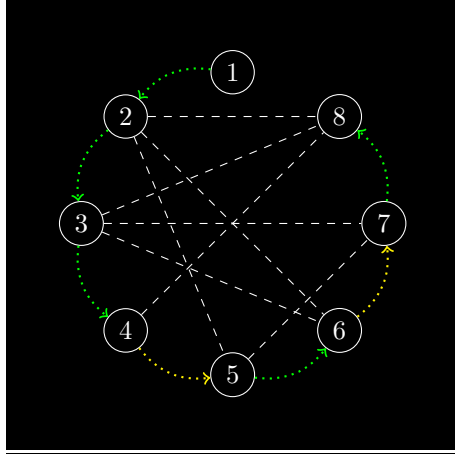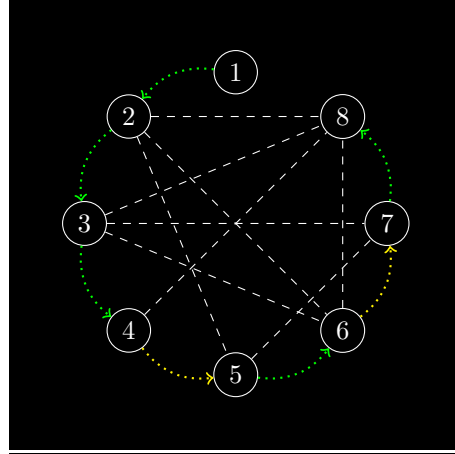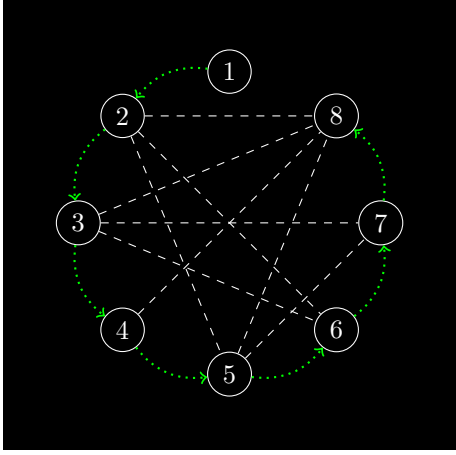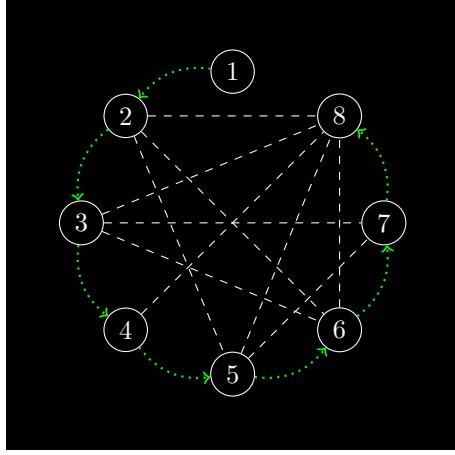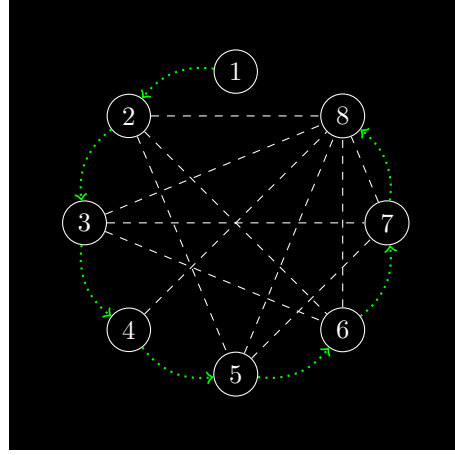

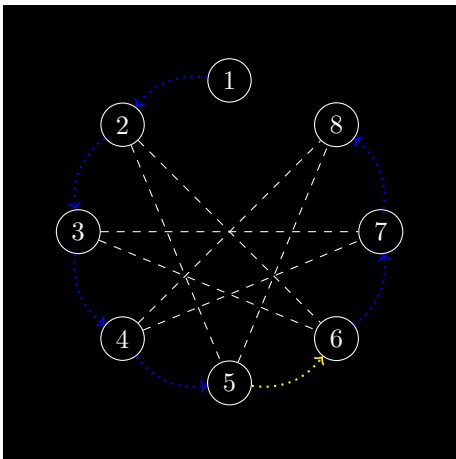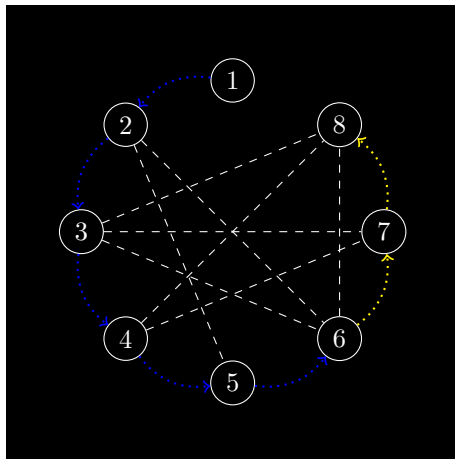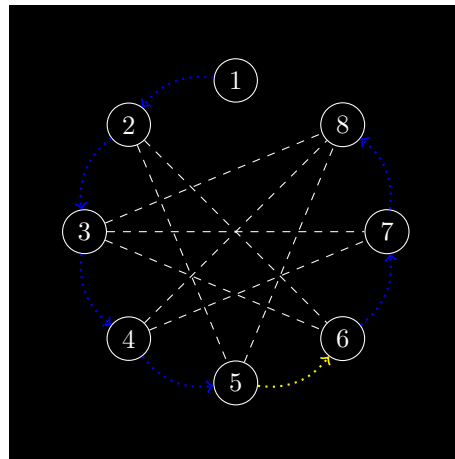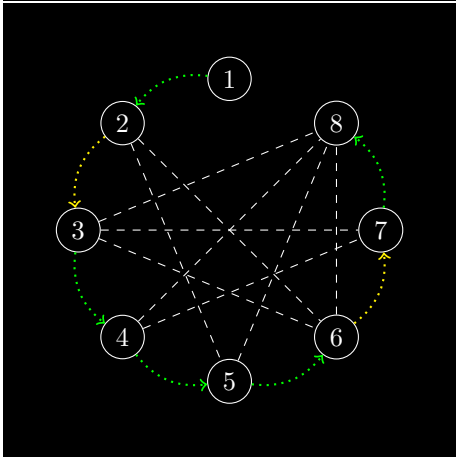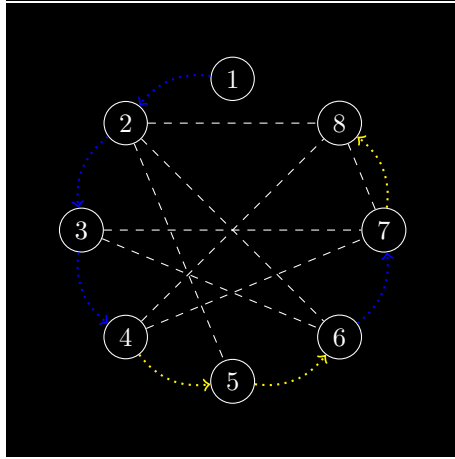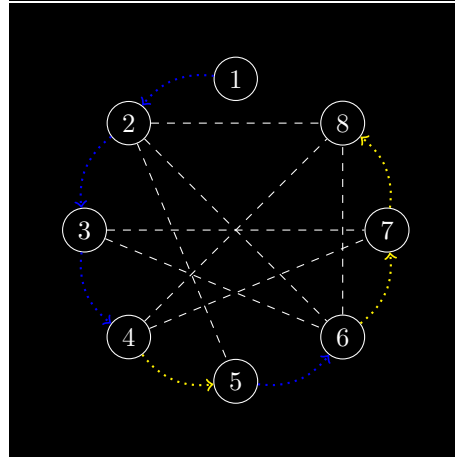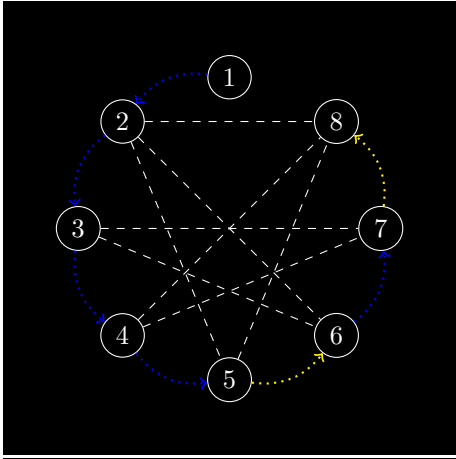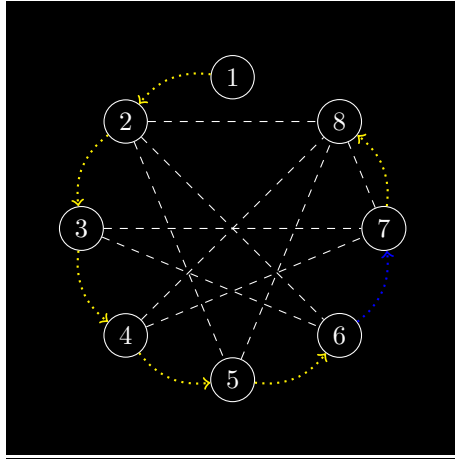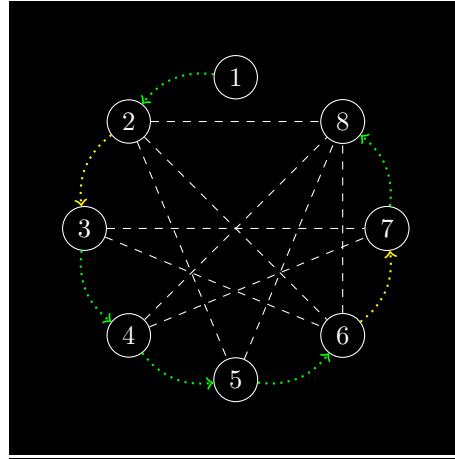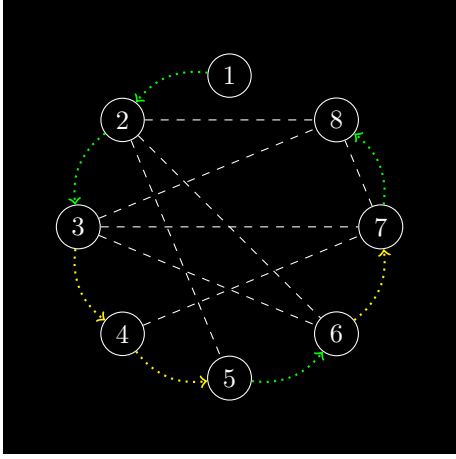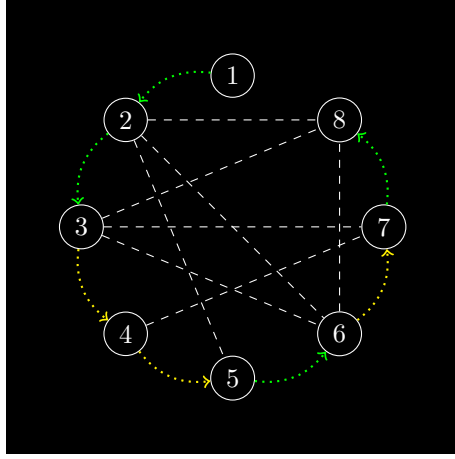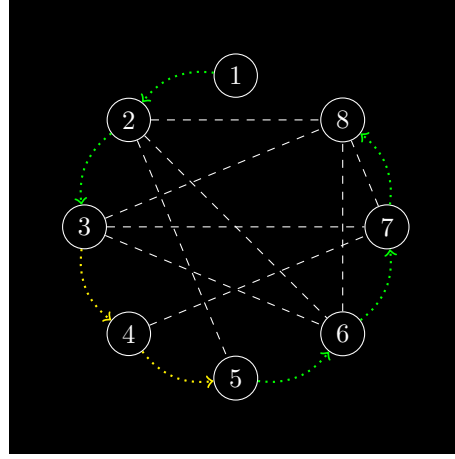

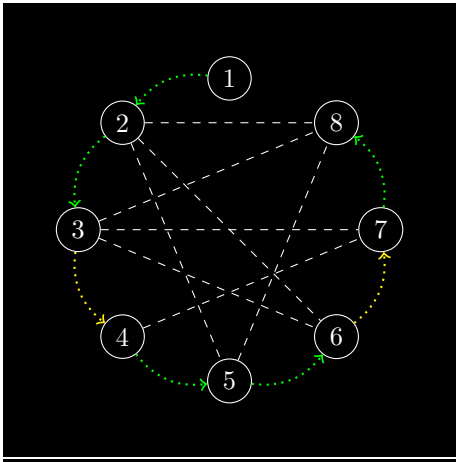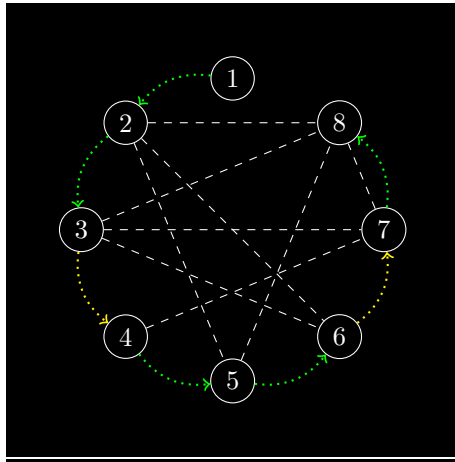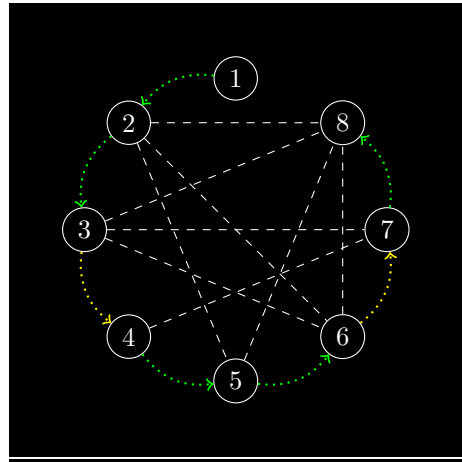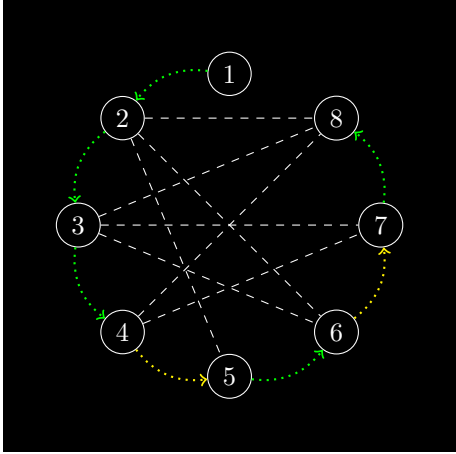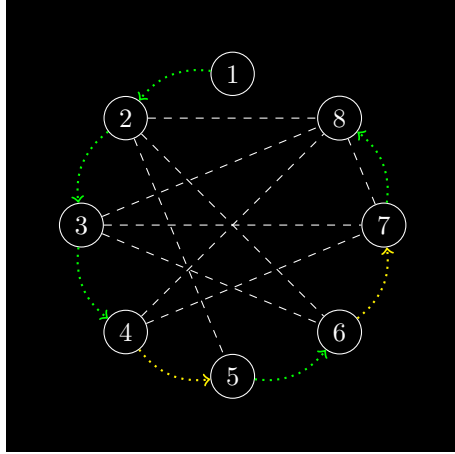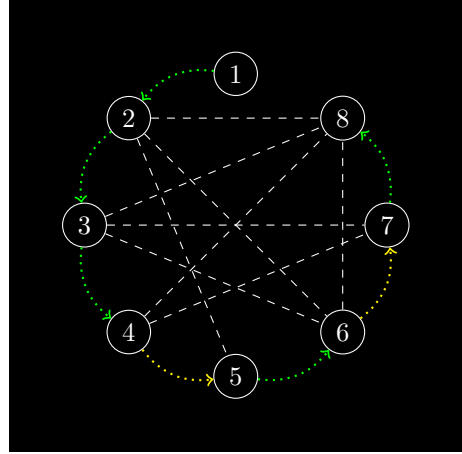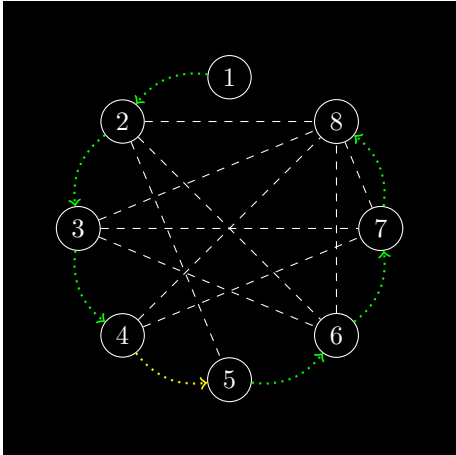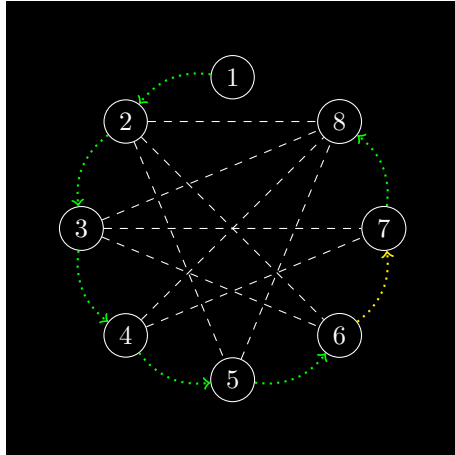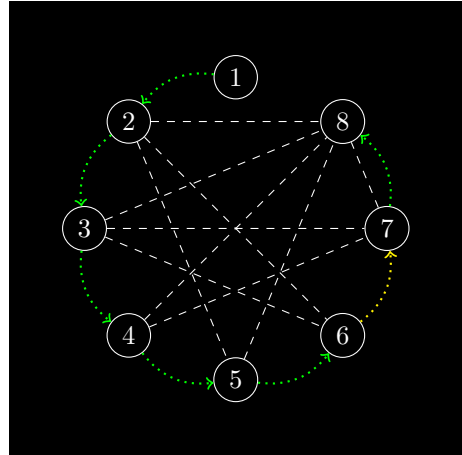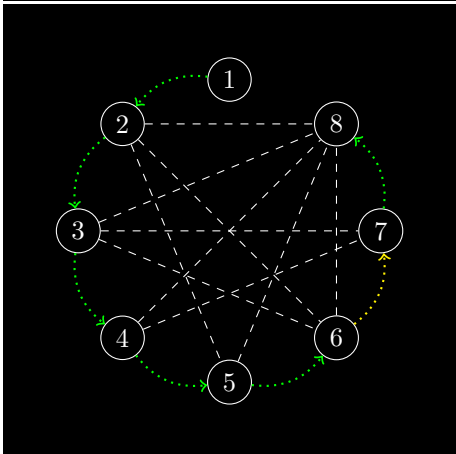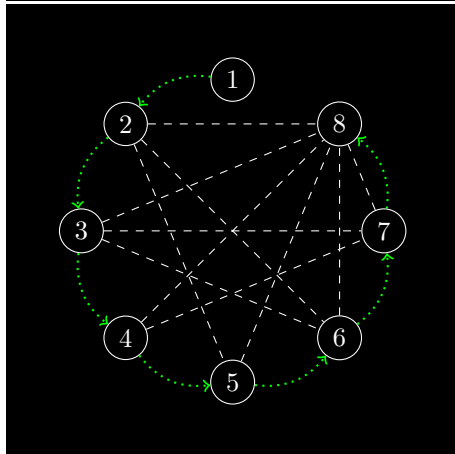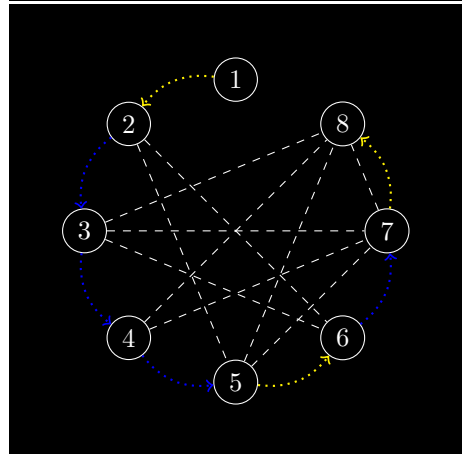

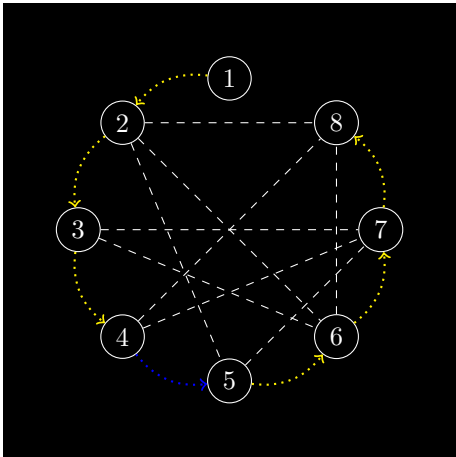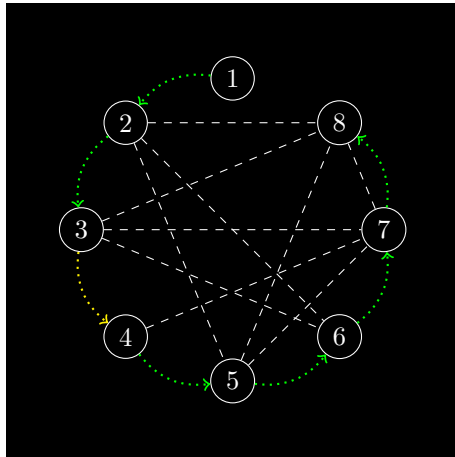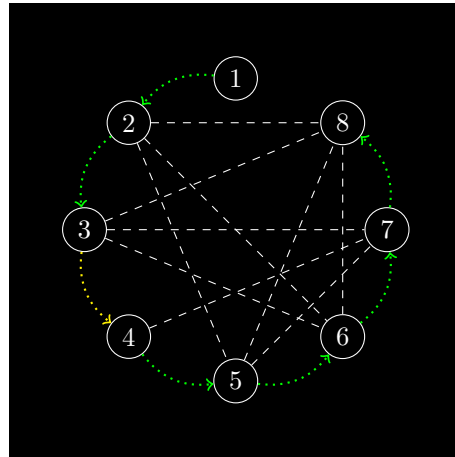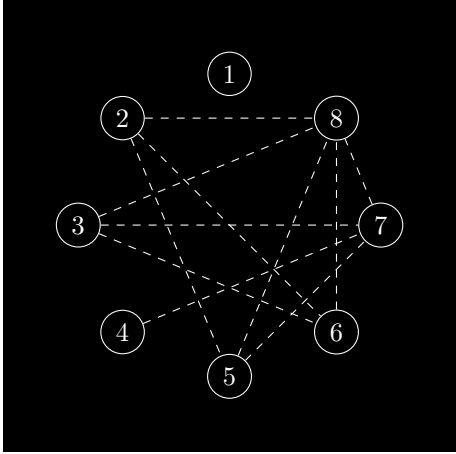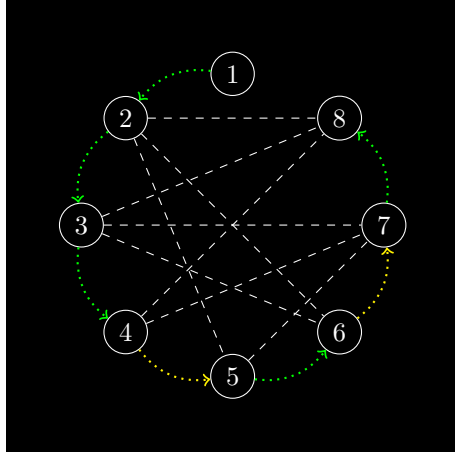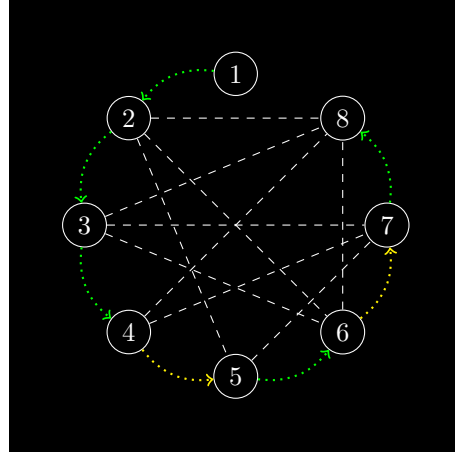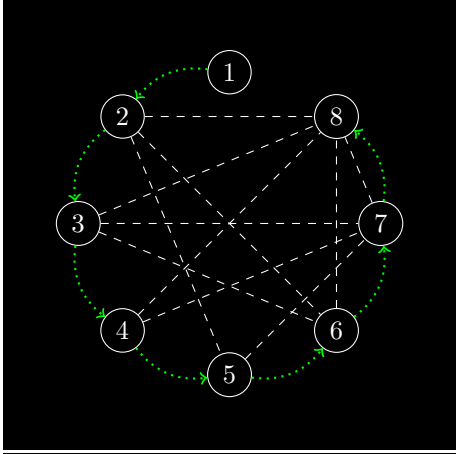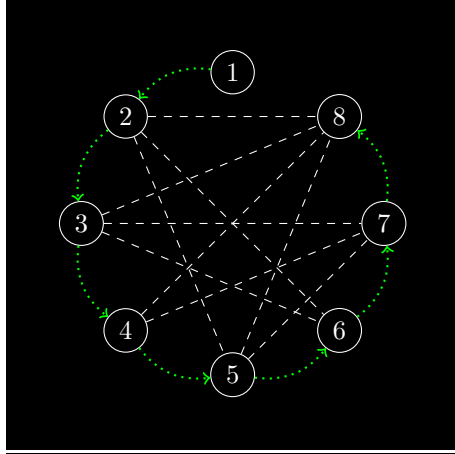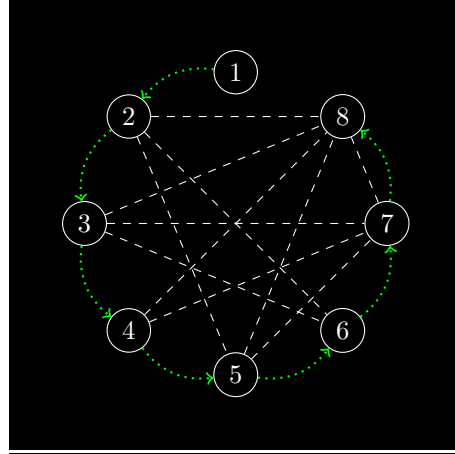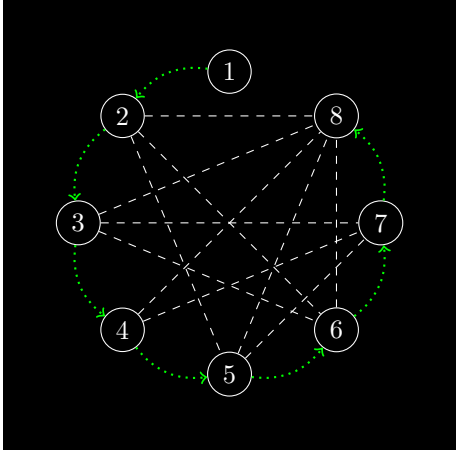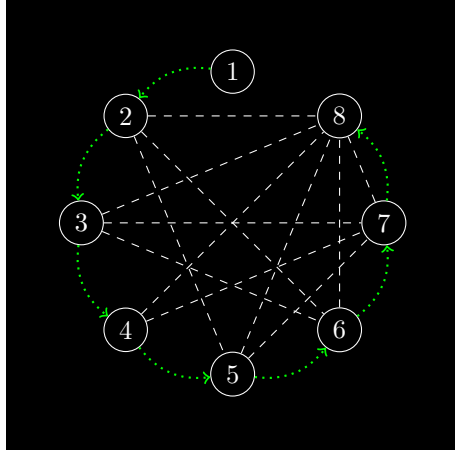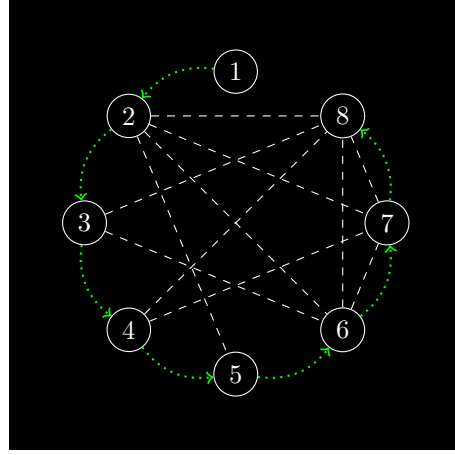

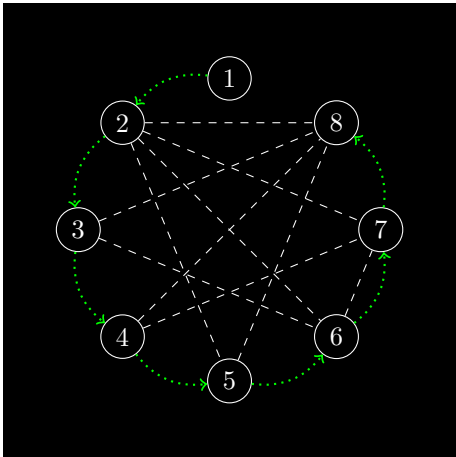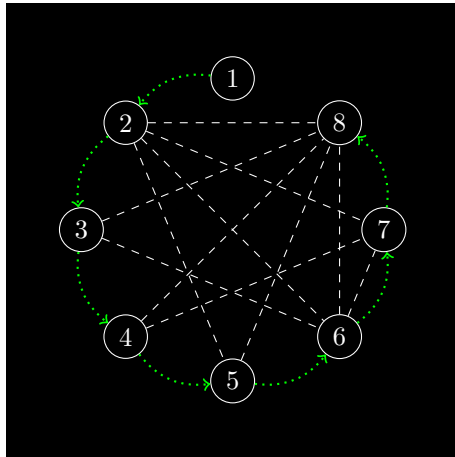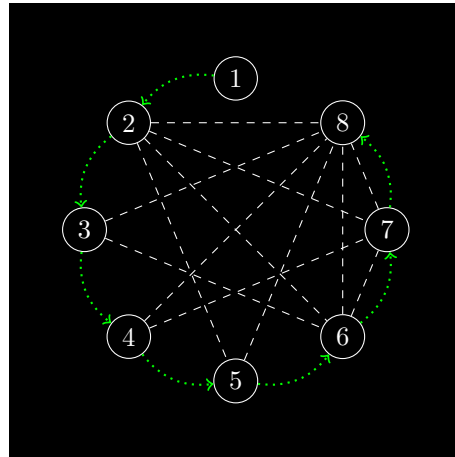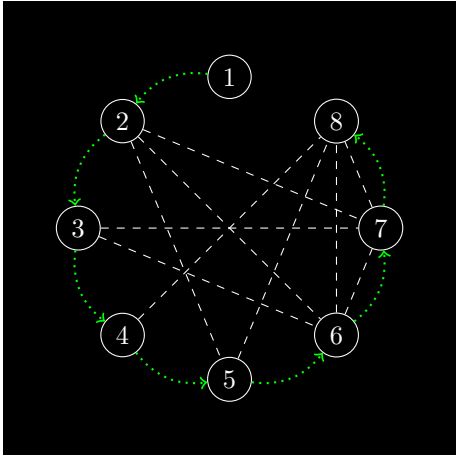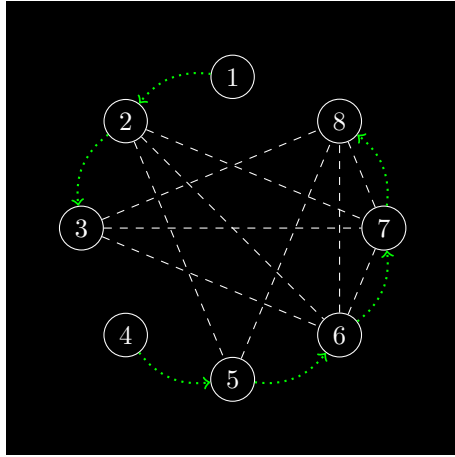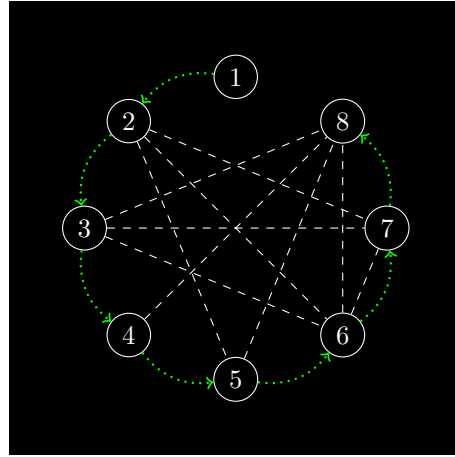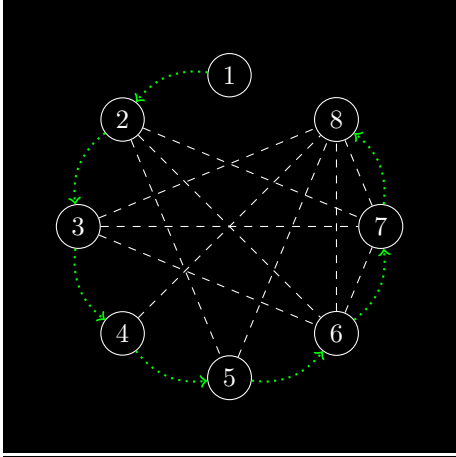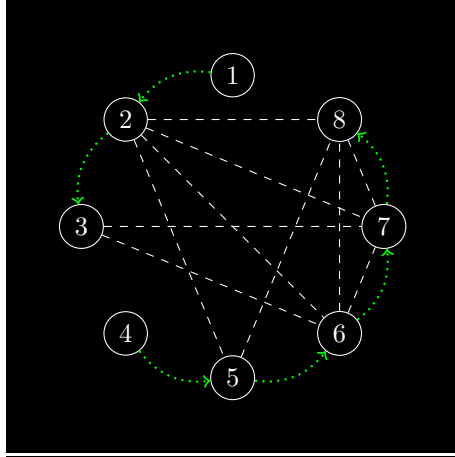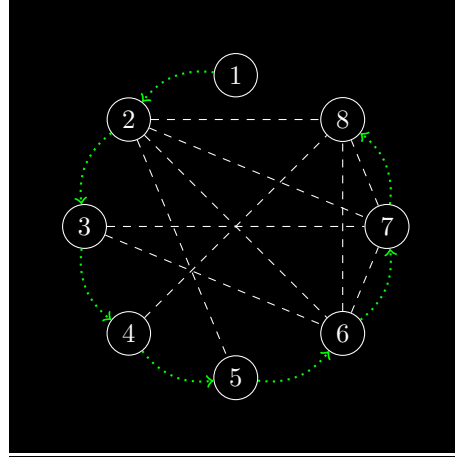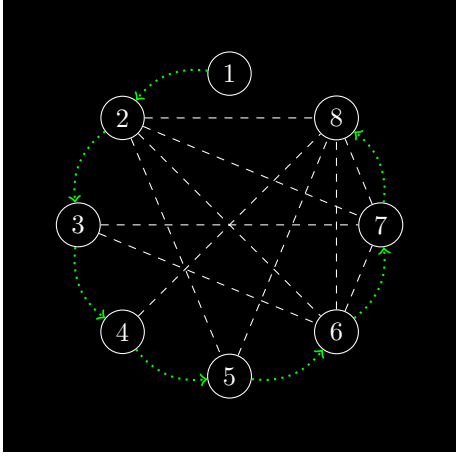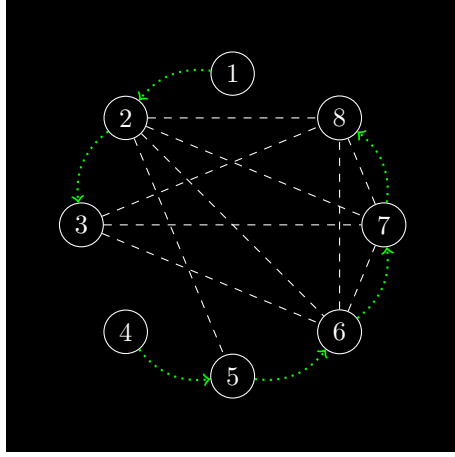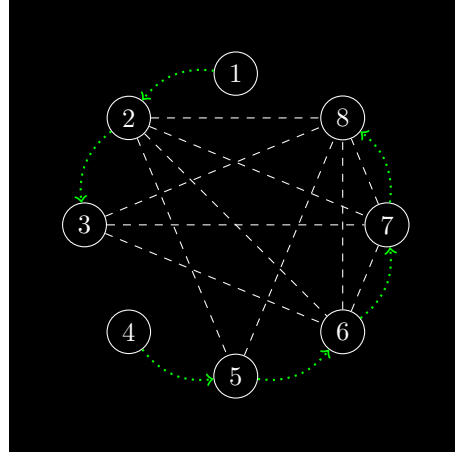

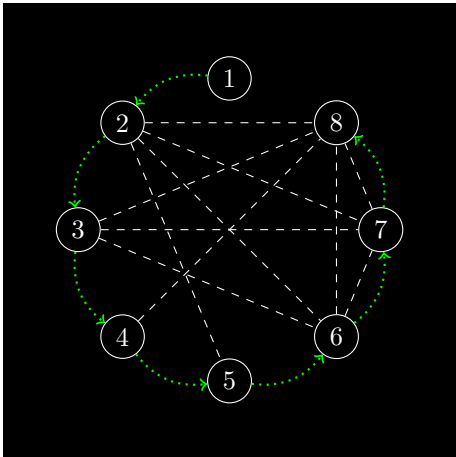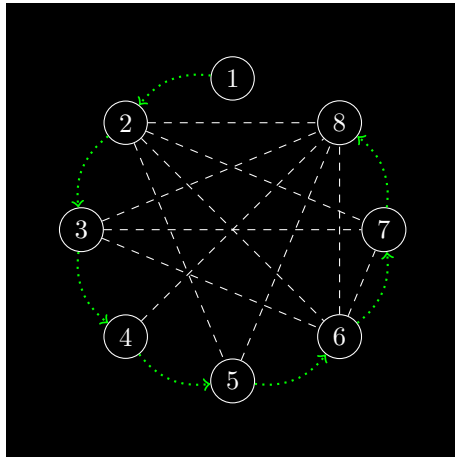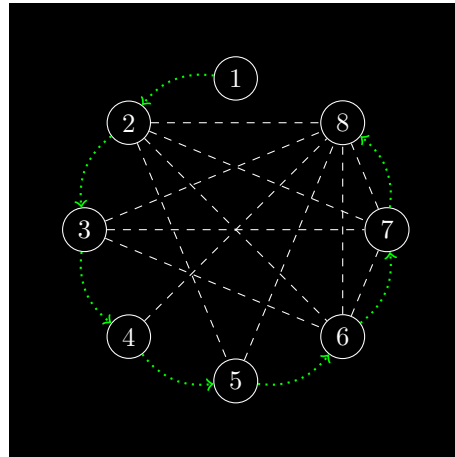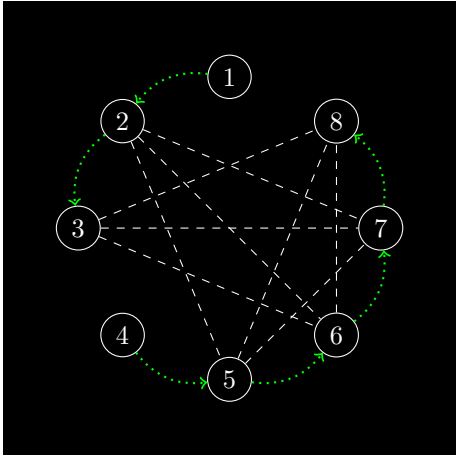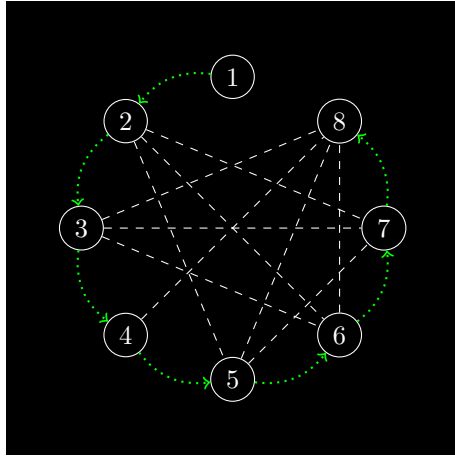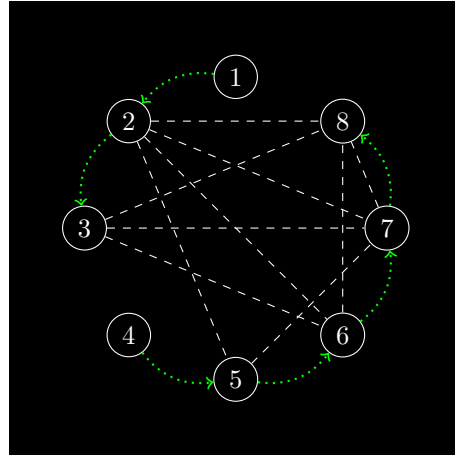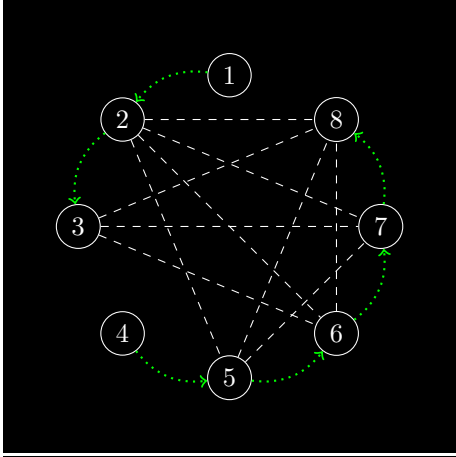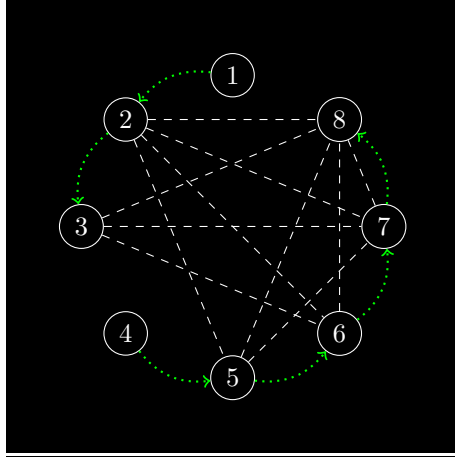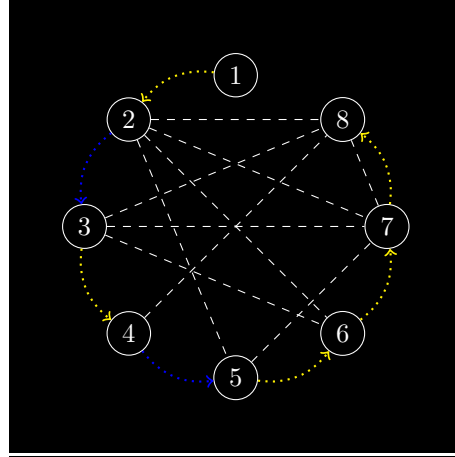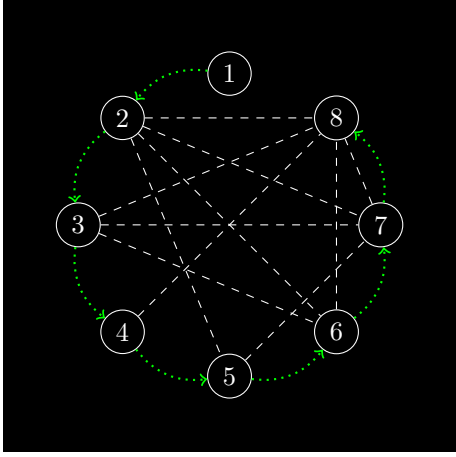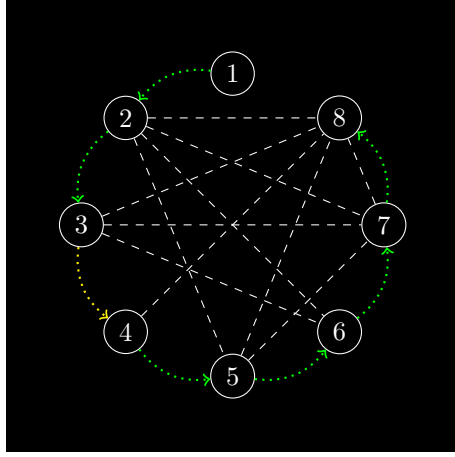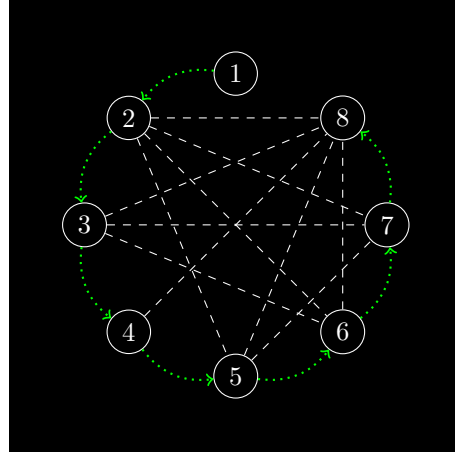

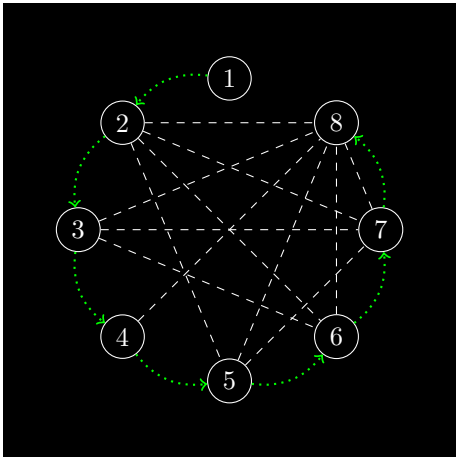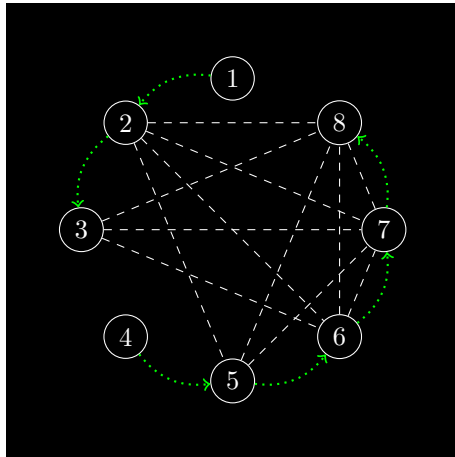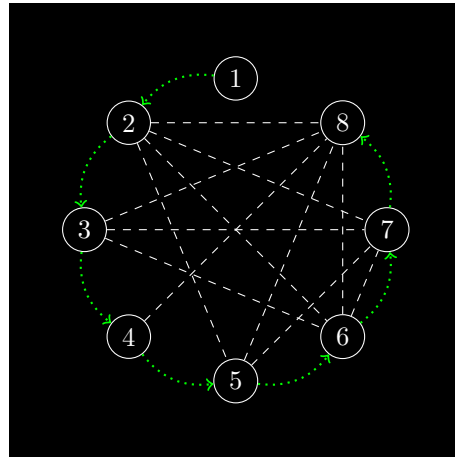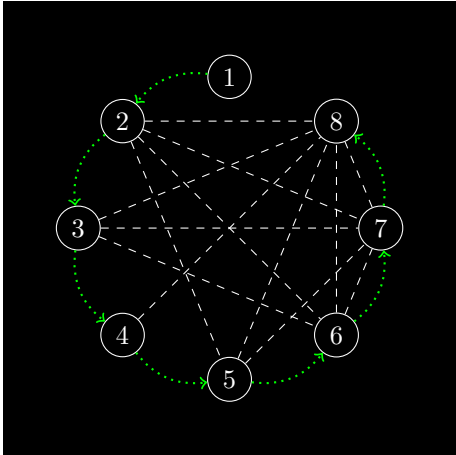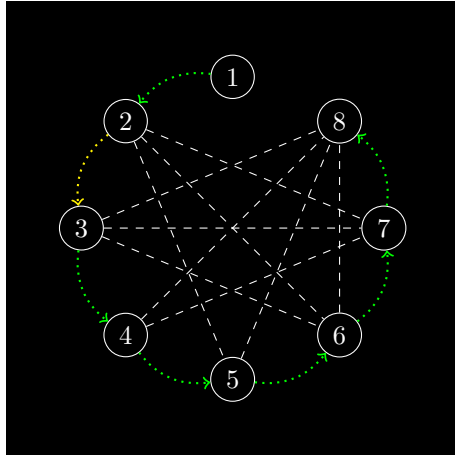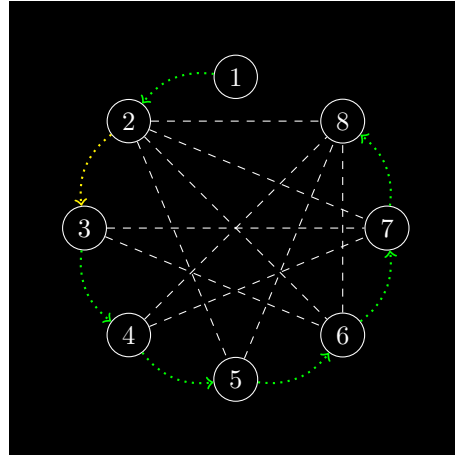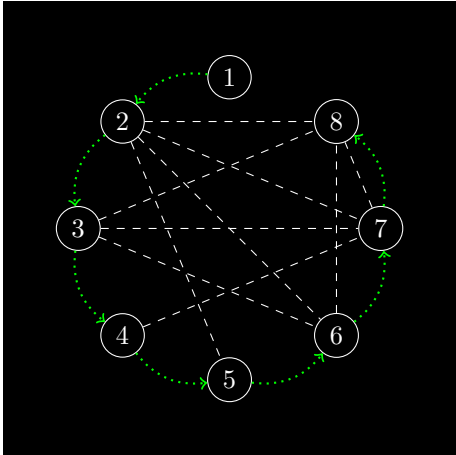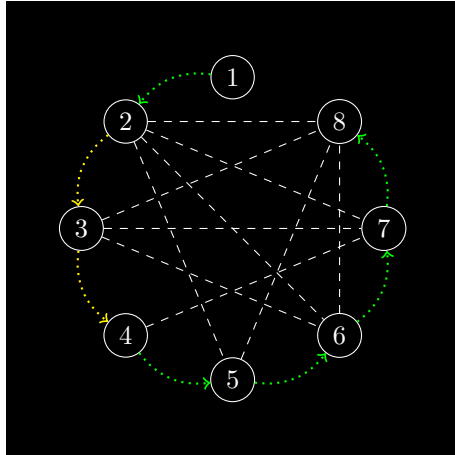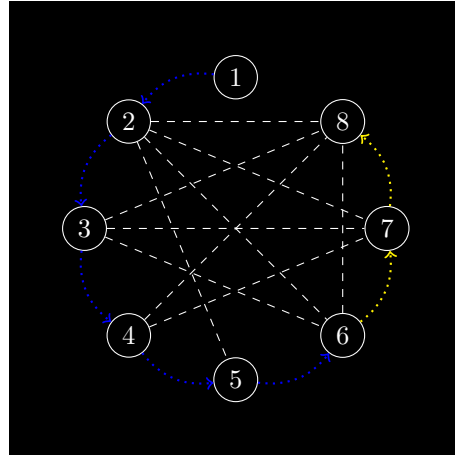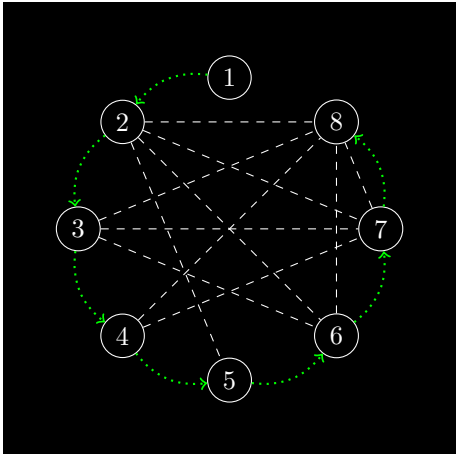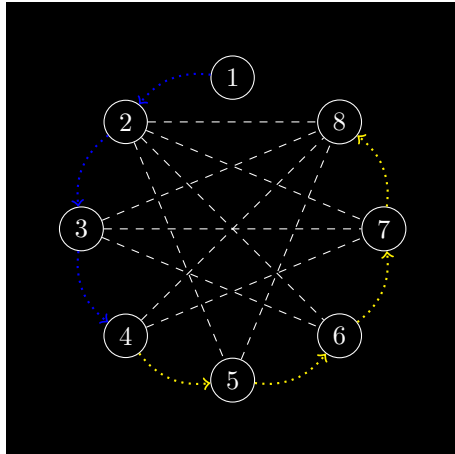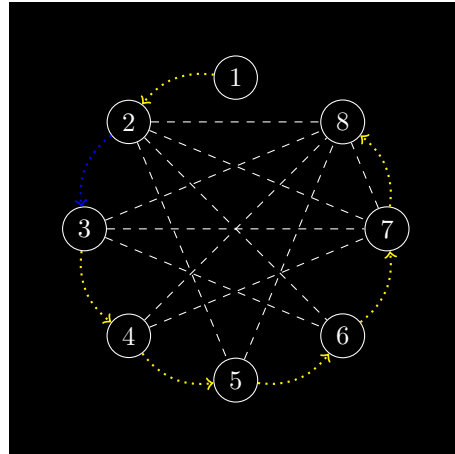



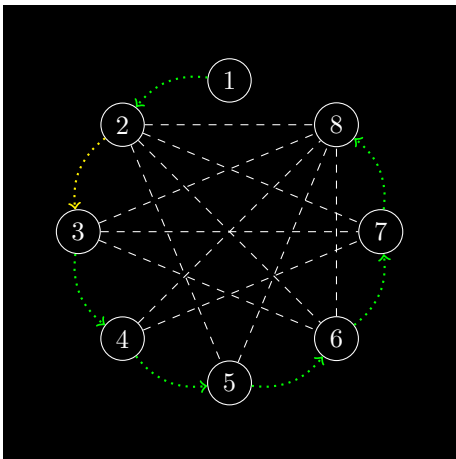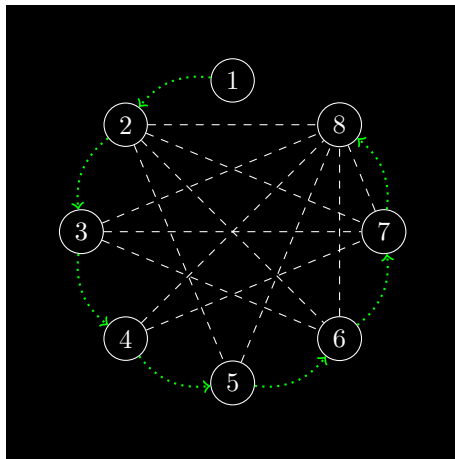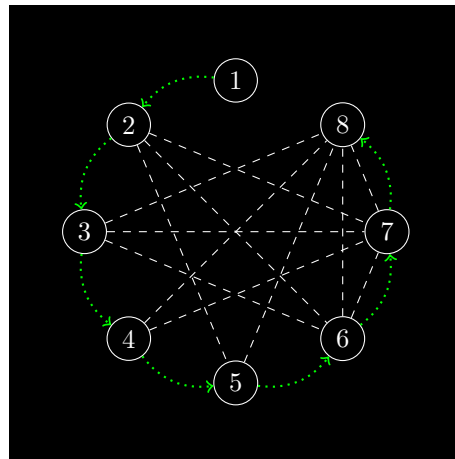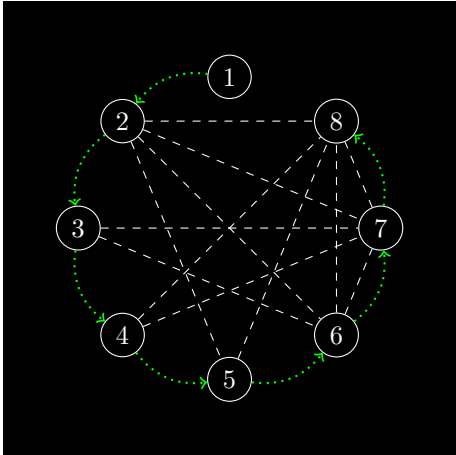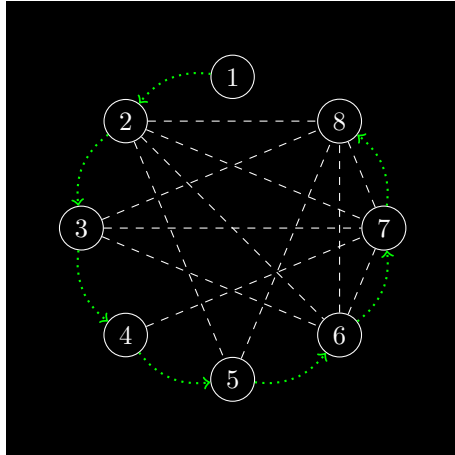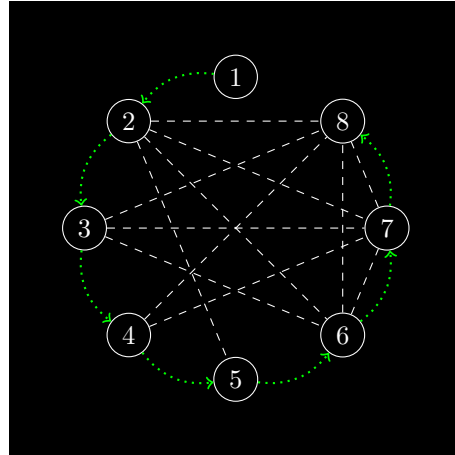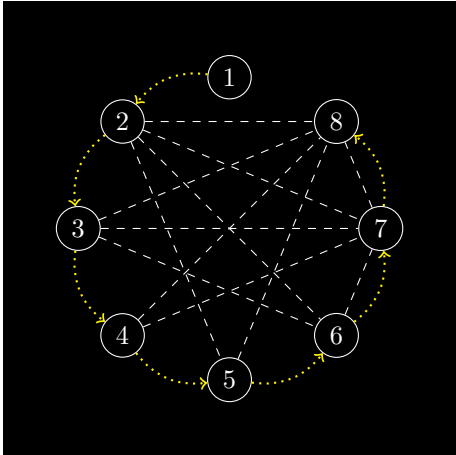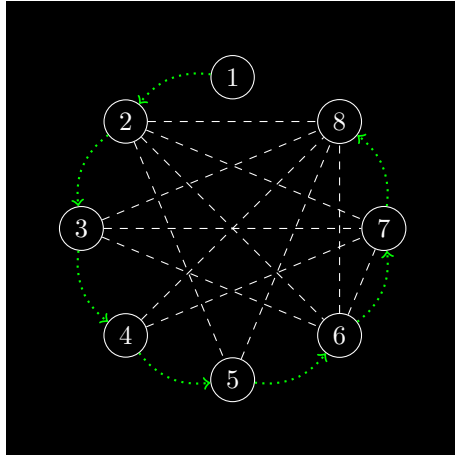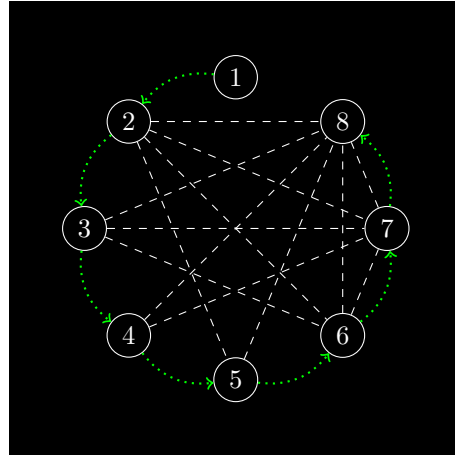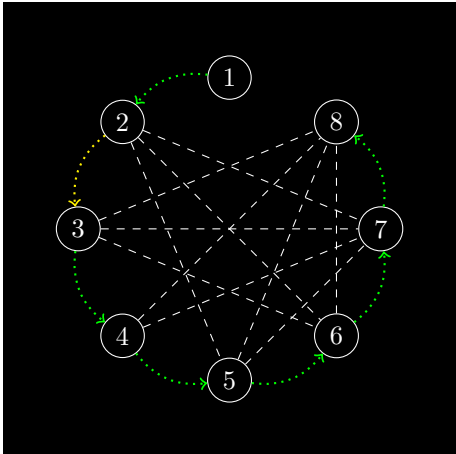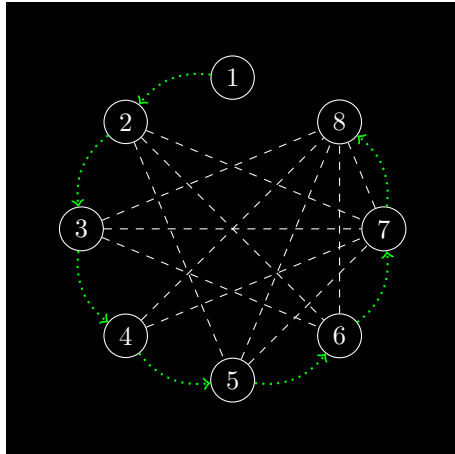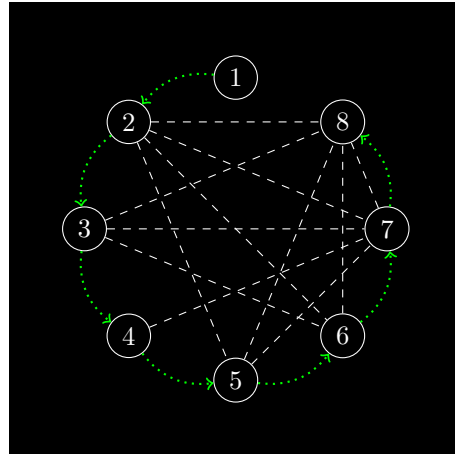

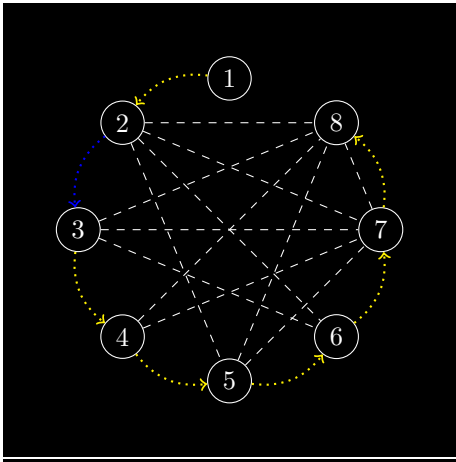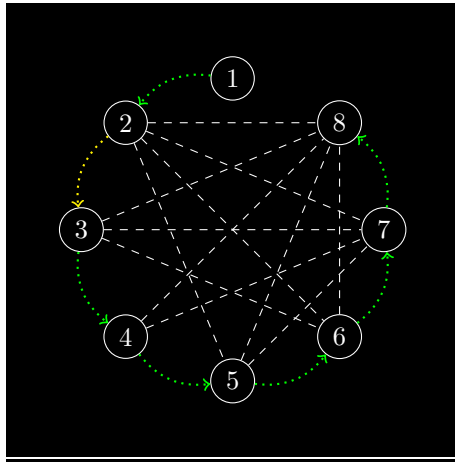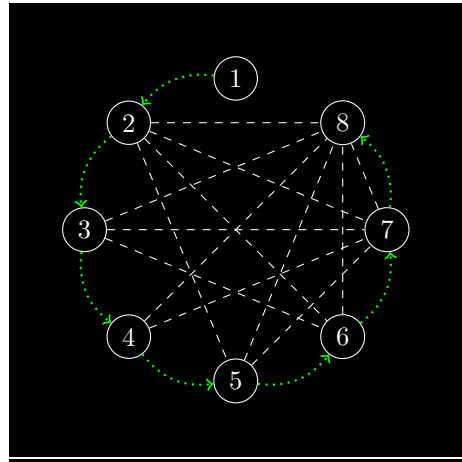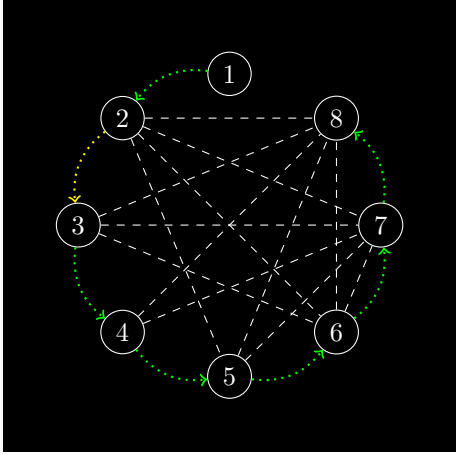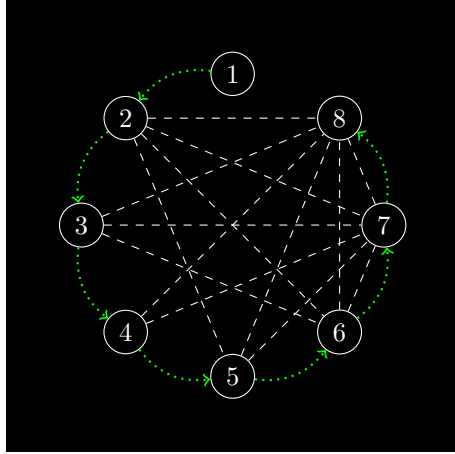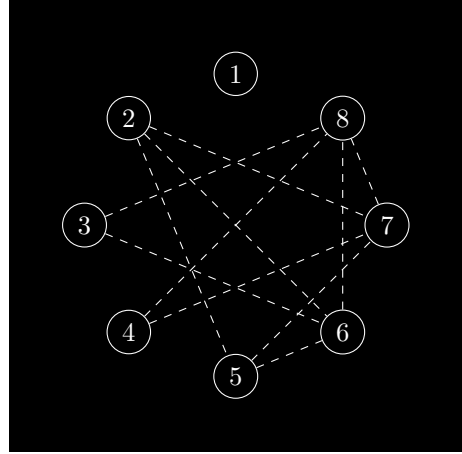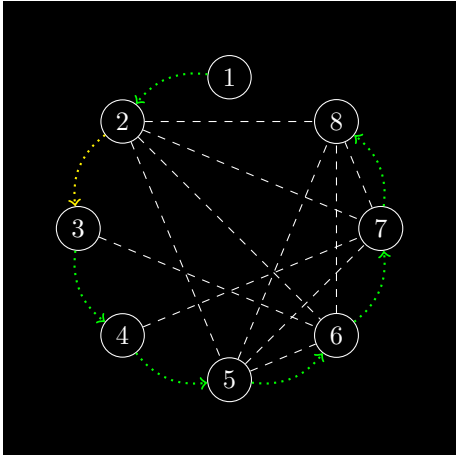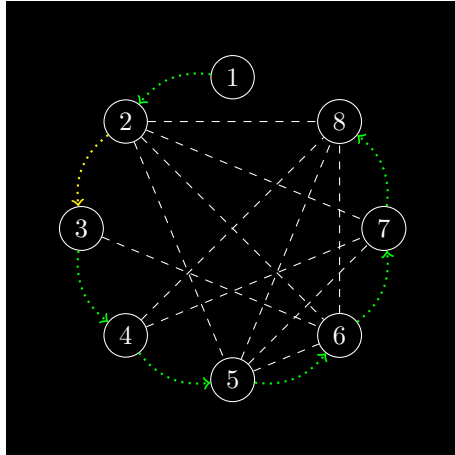

Supplement: Supplementary file 3 [file van-der-zander22a-supp.zip]
