# Supplementary material
Source: ML conference proceedings conference paper supplement (https://proceedings.mlr.press/v151/van-der-zander22a.html)

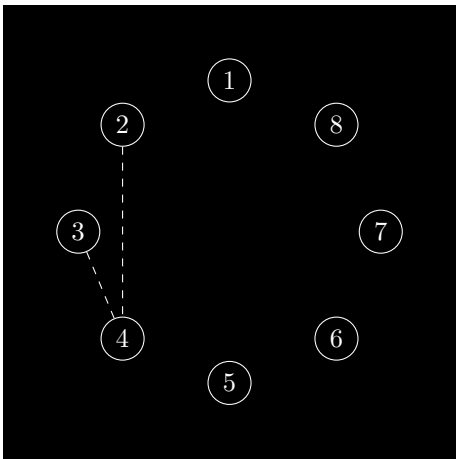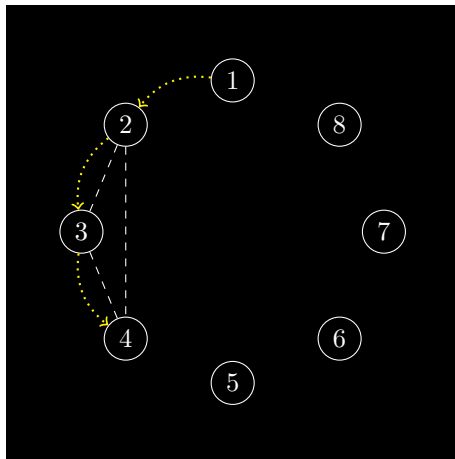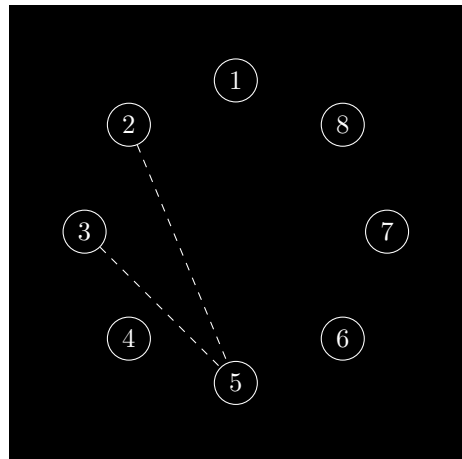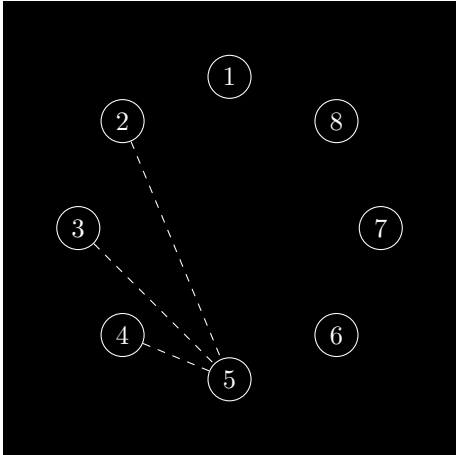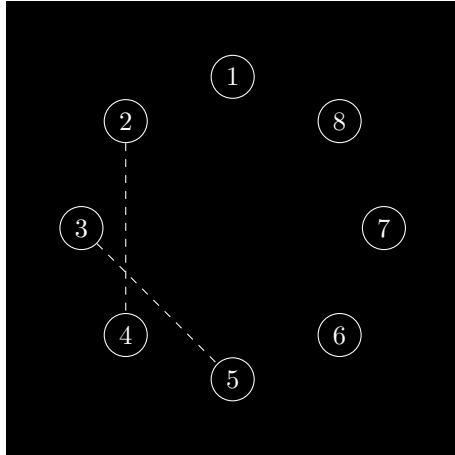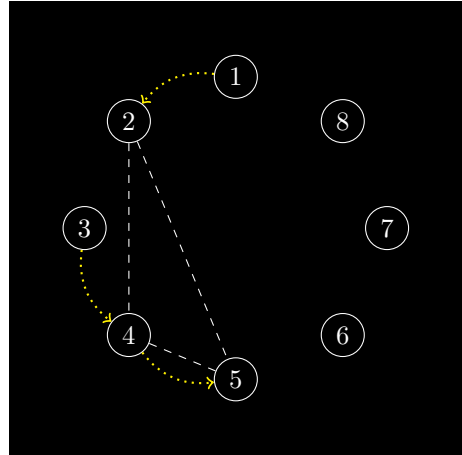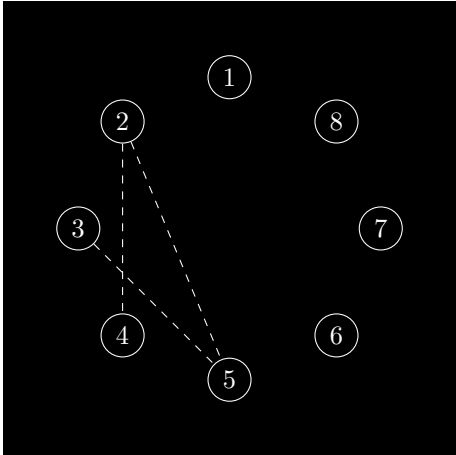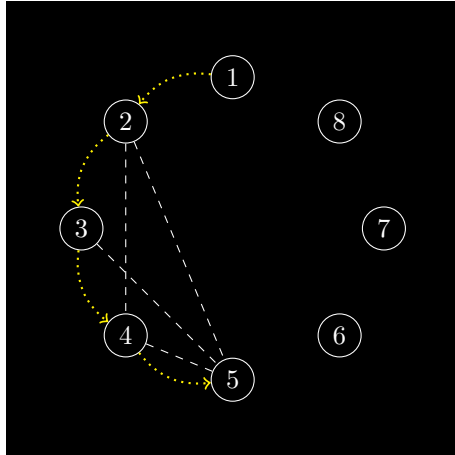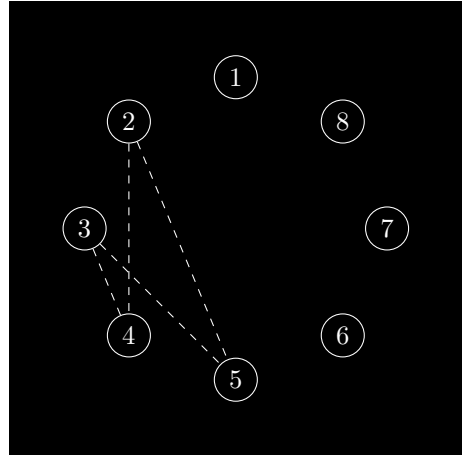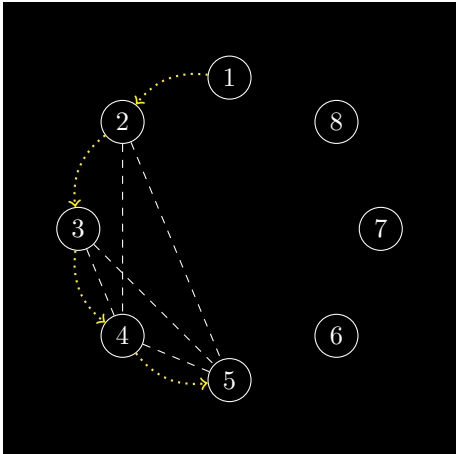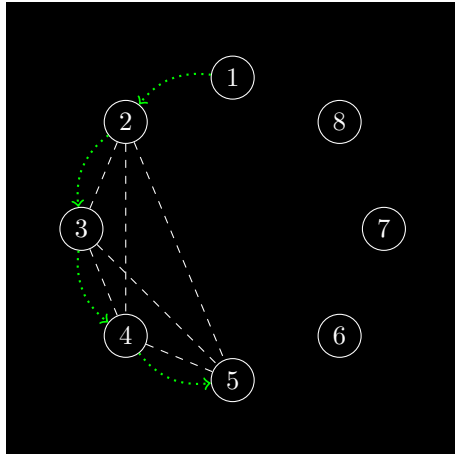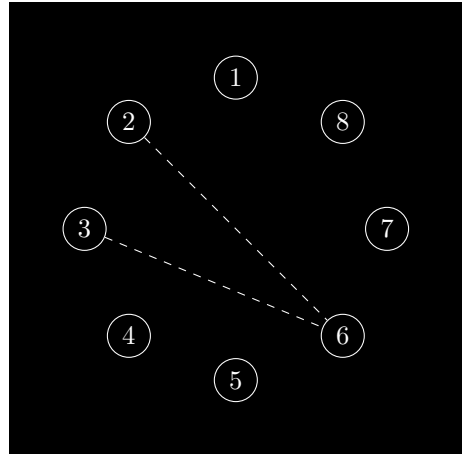

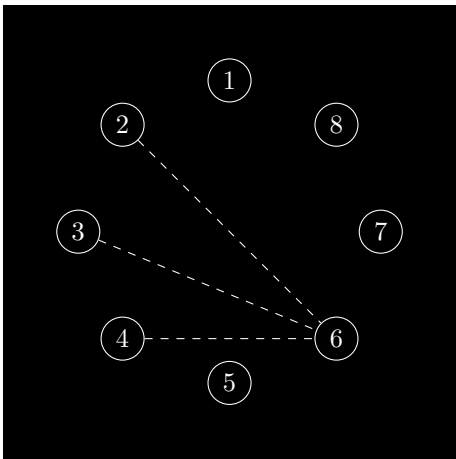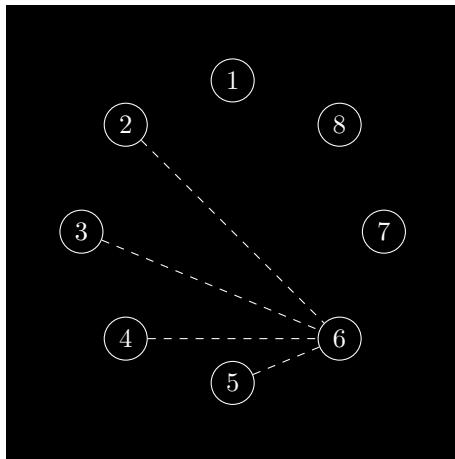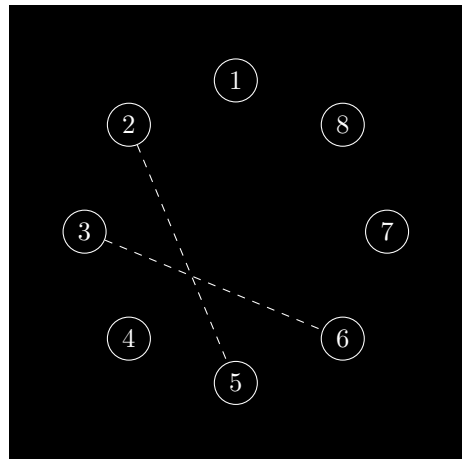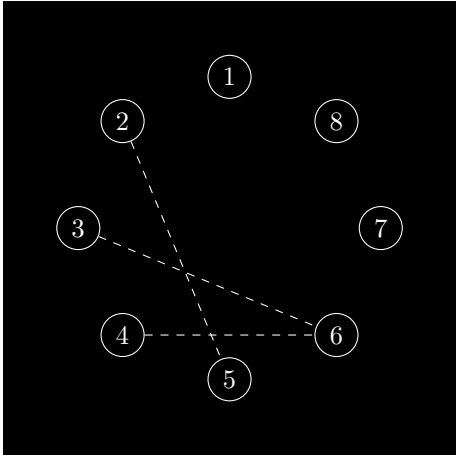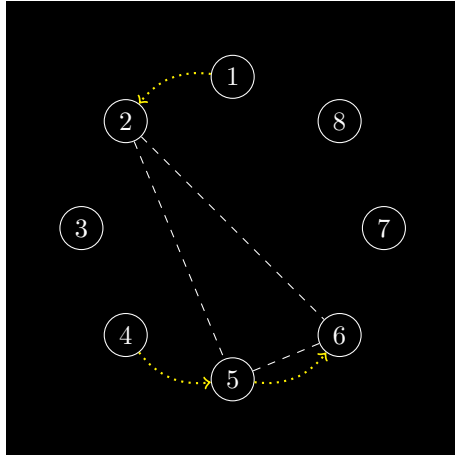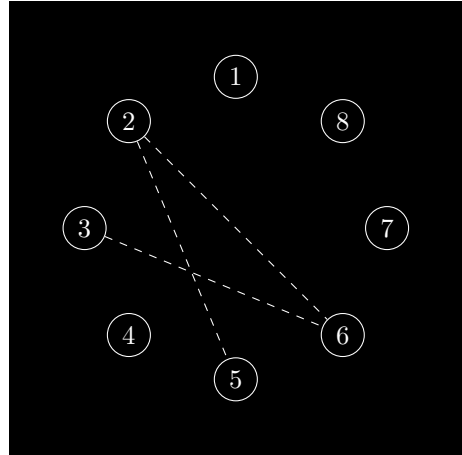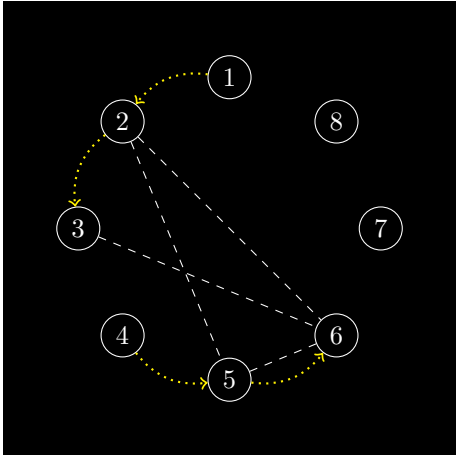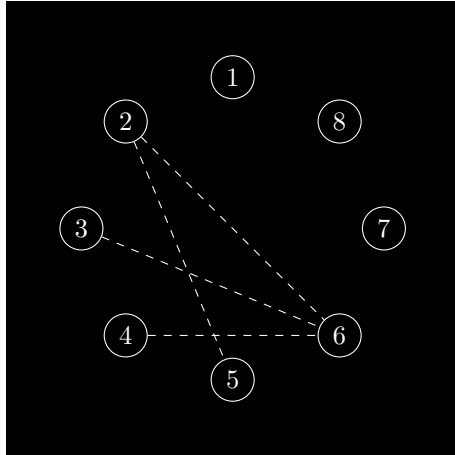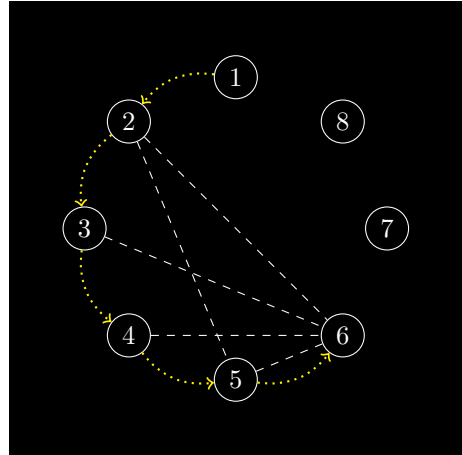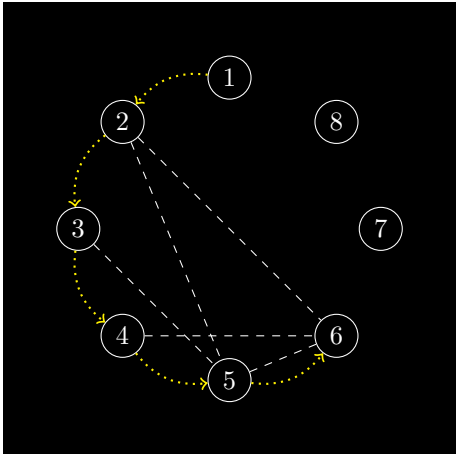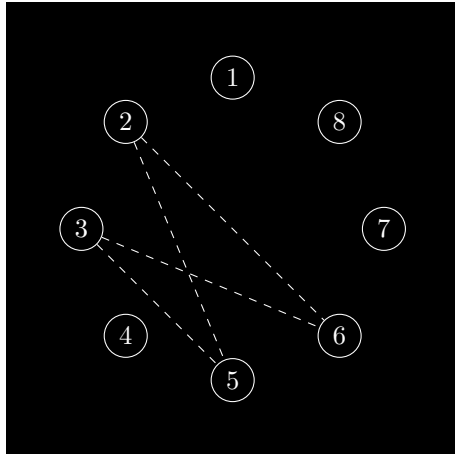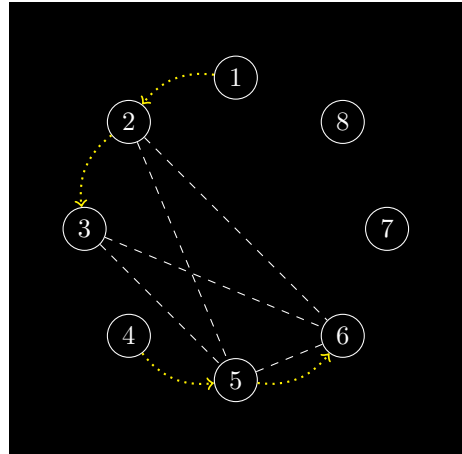

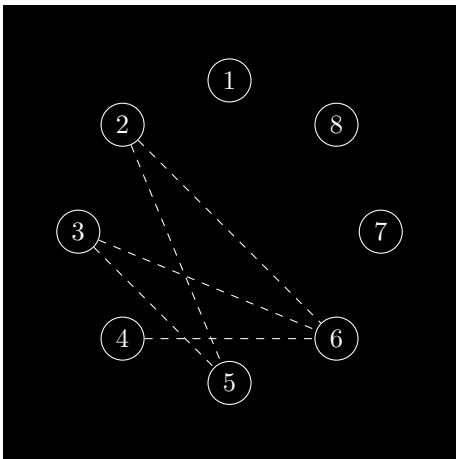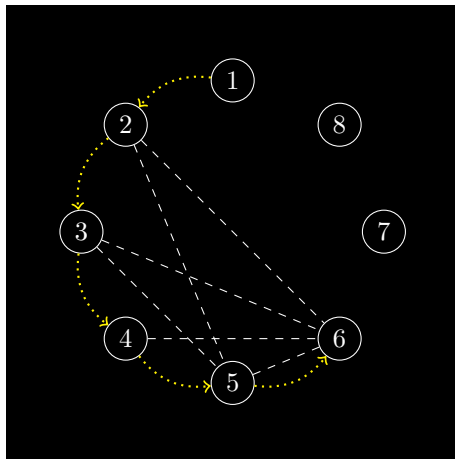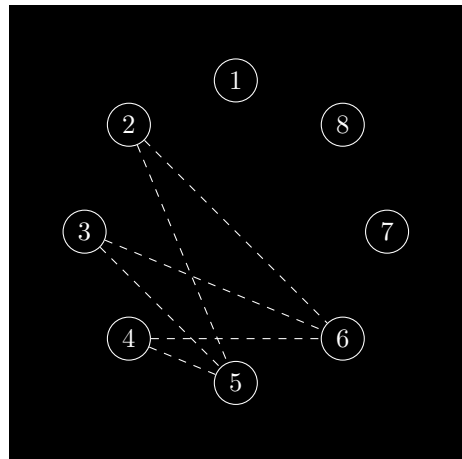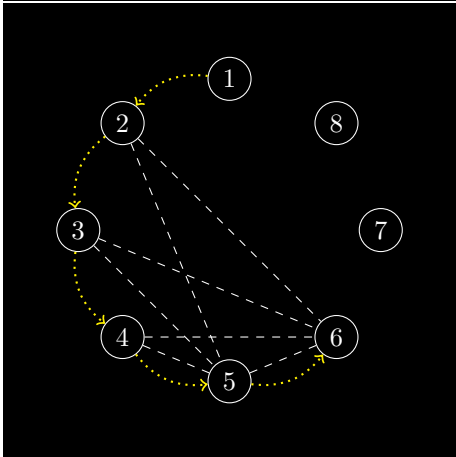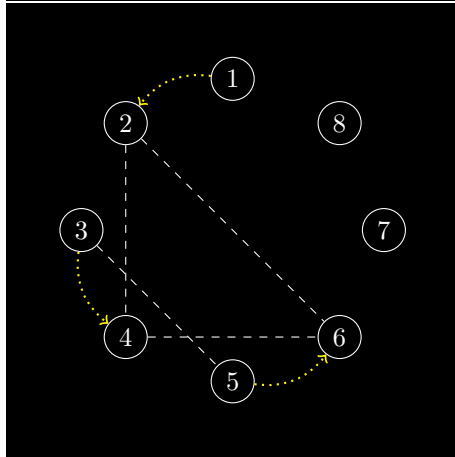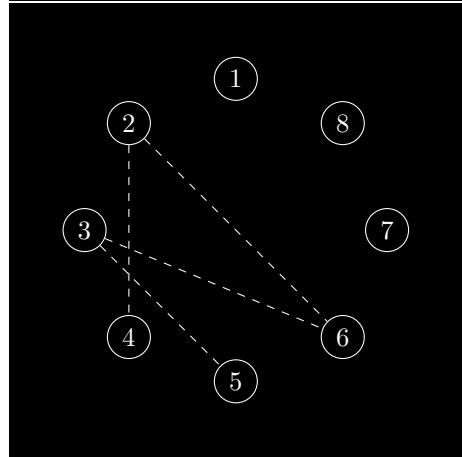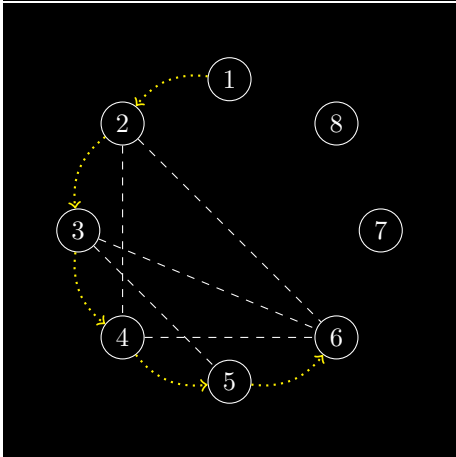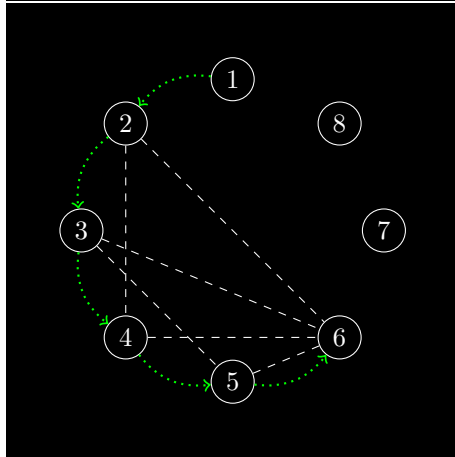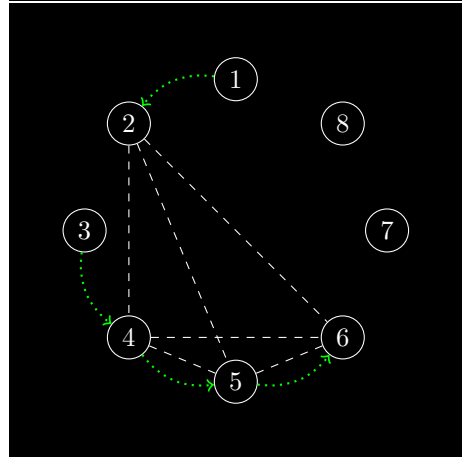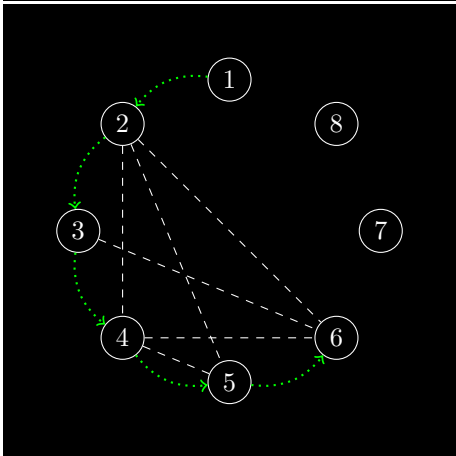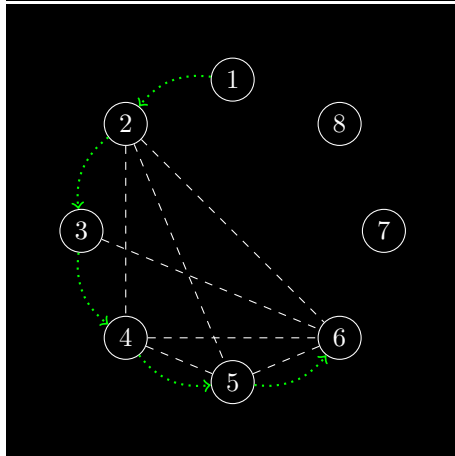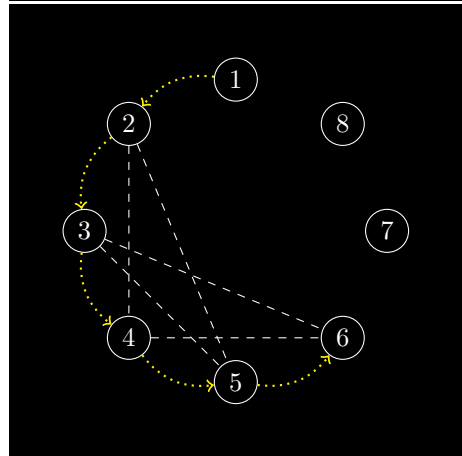

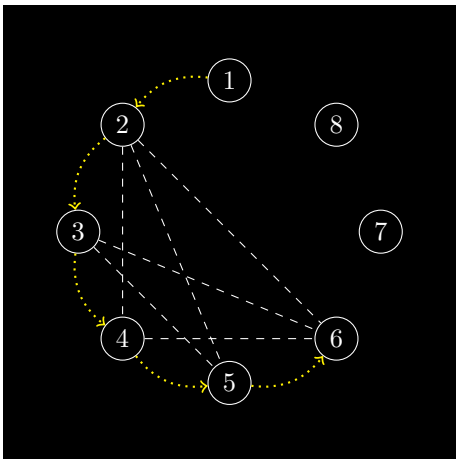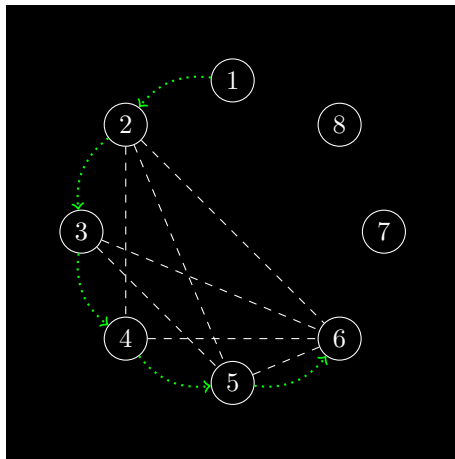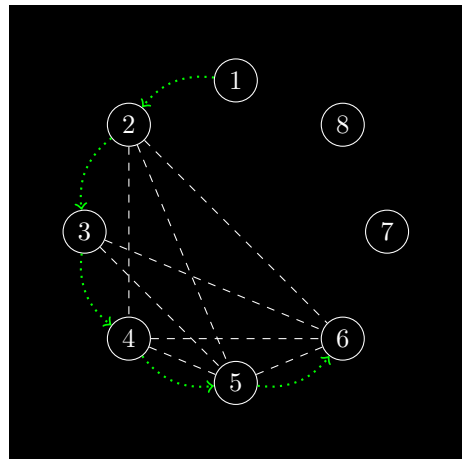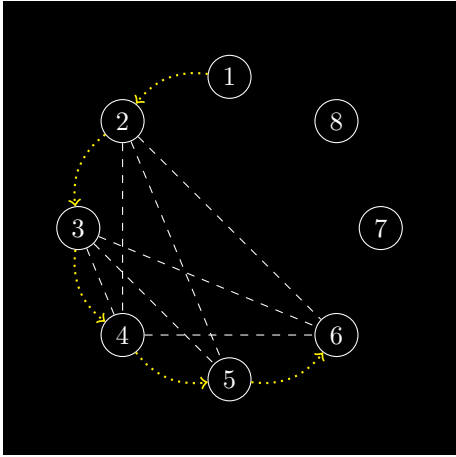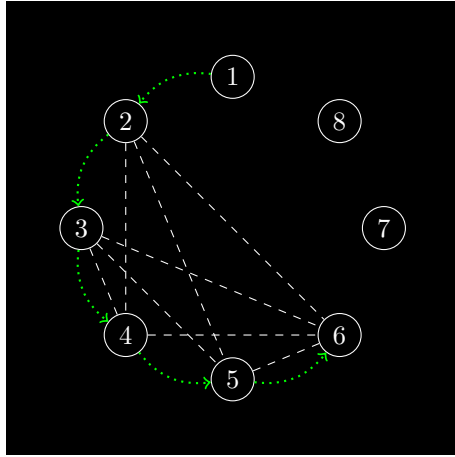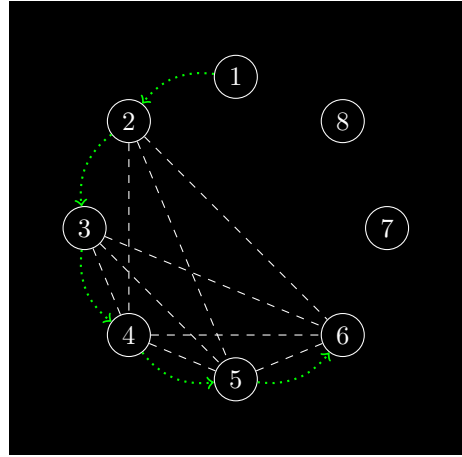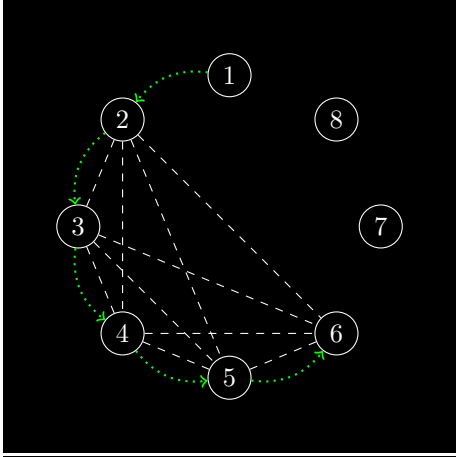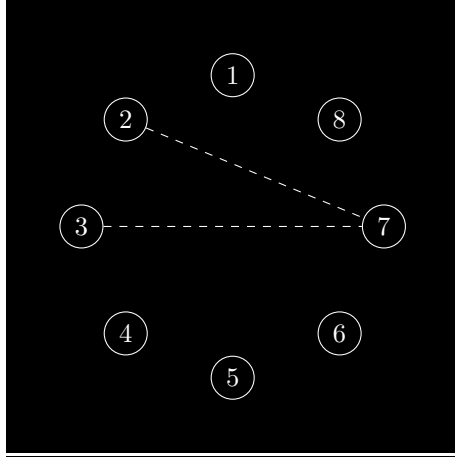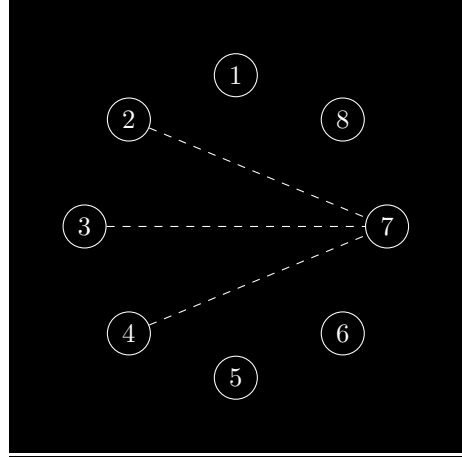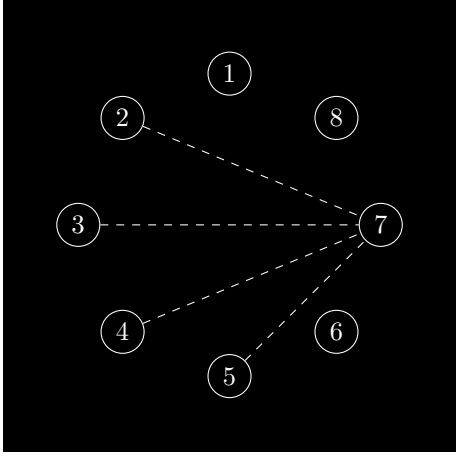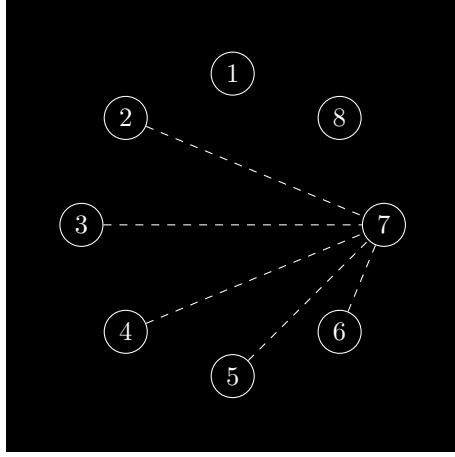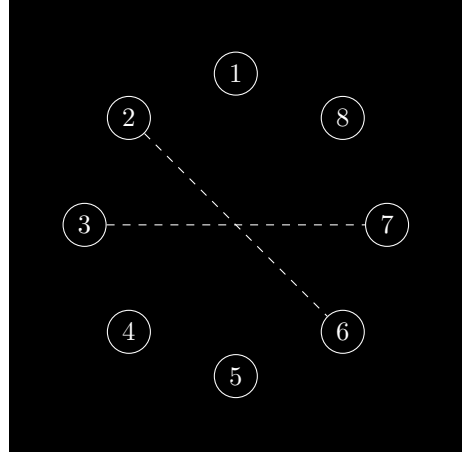

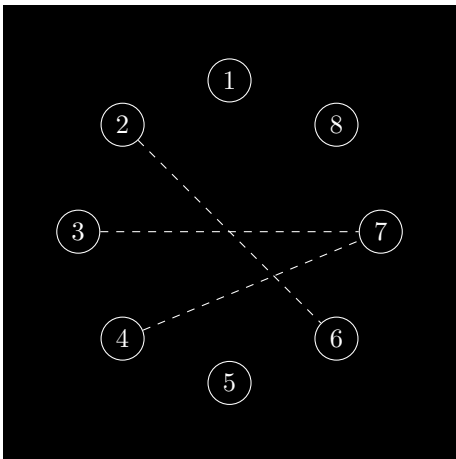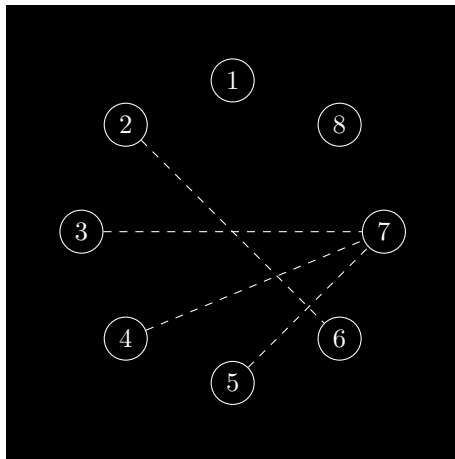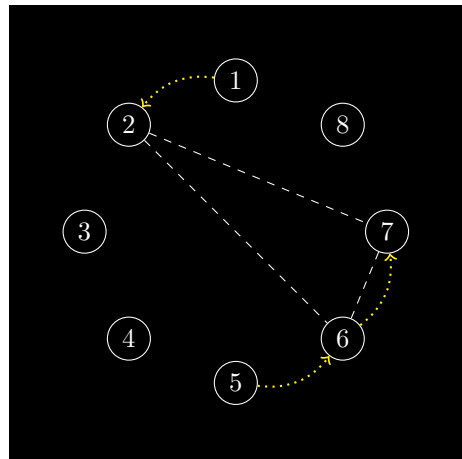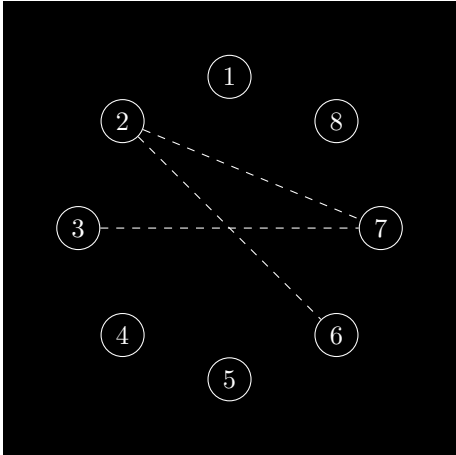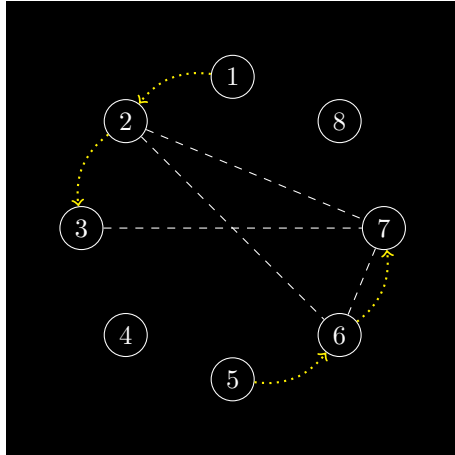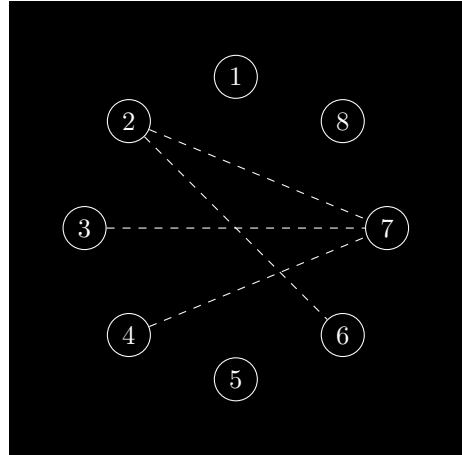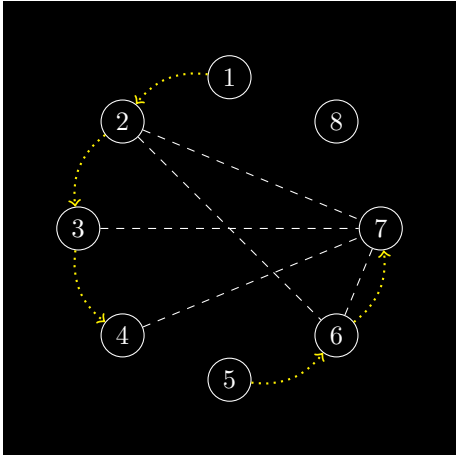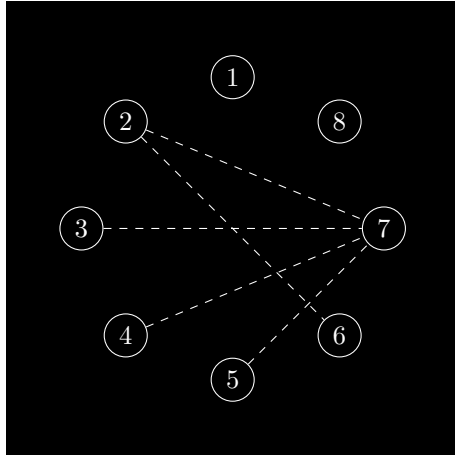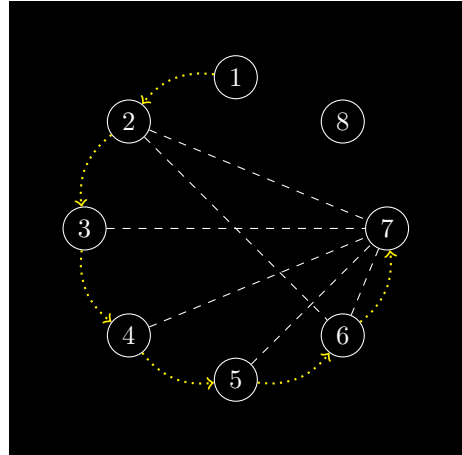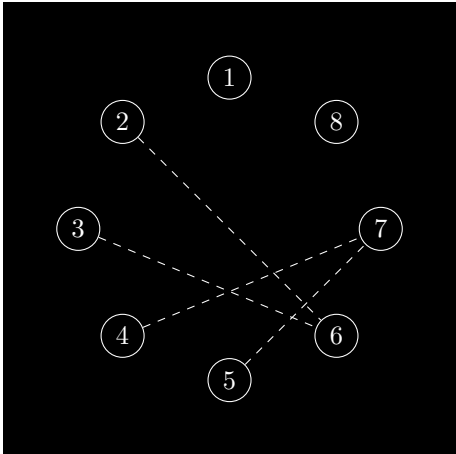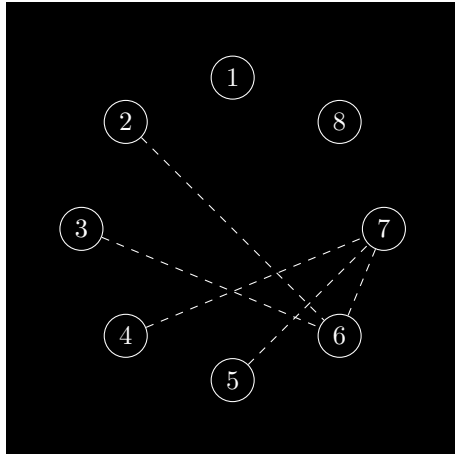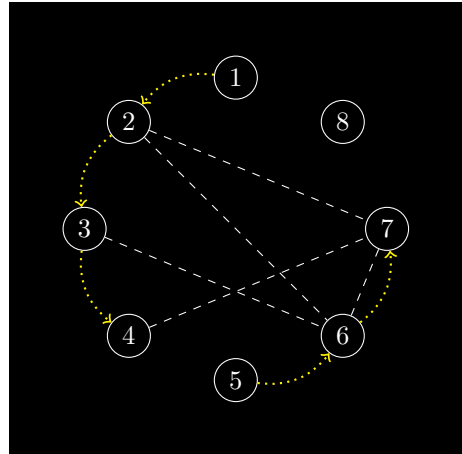

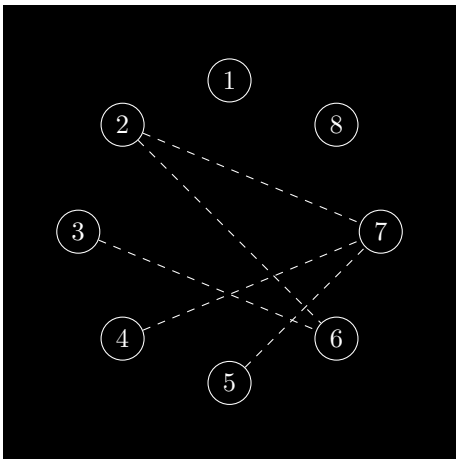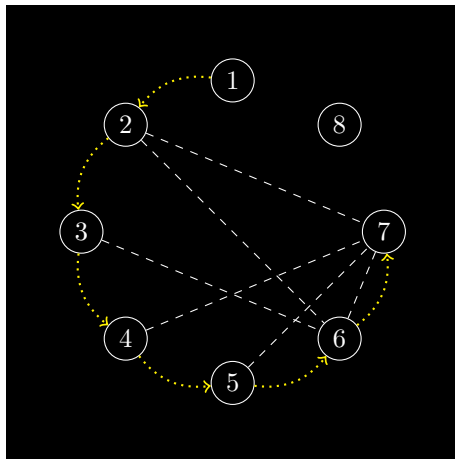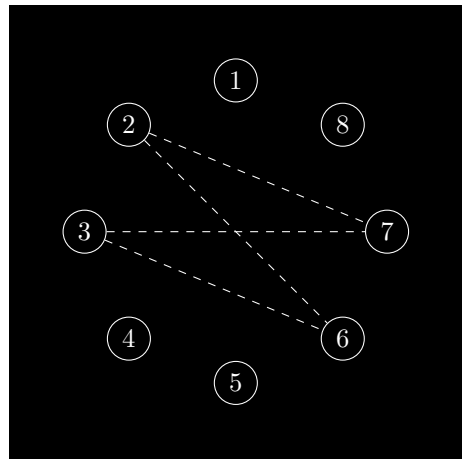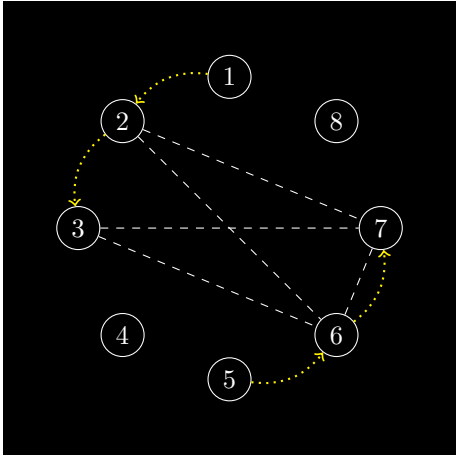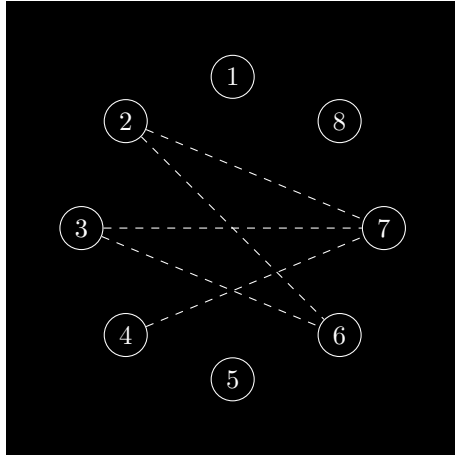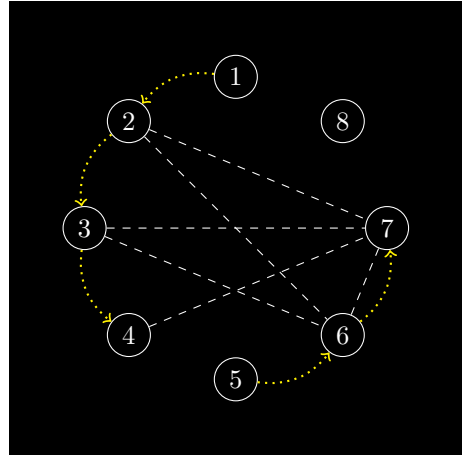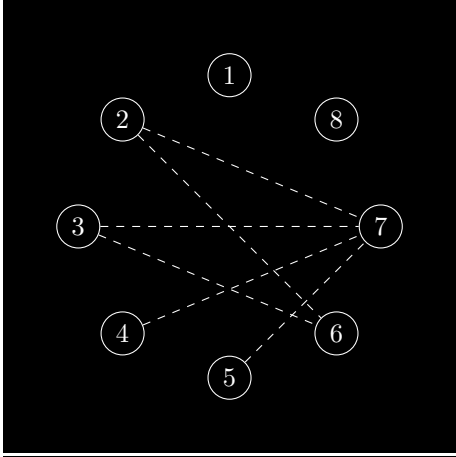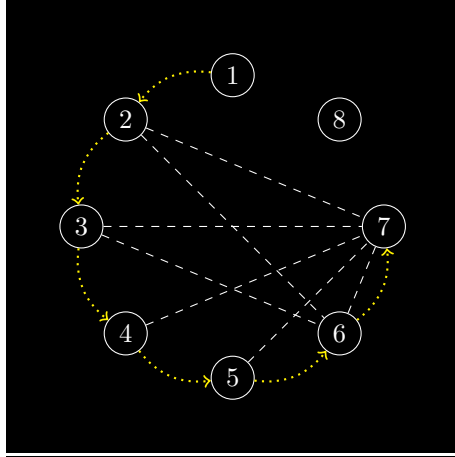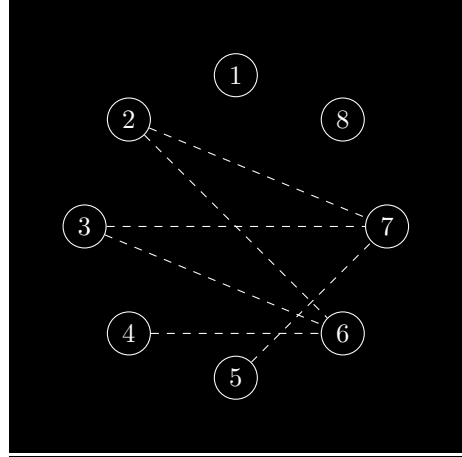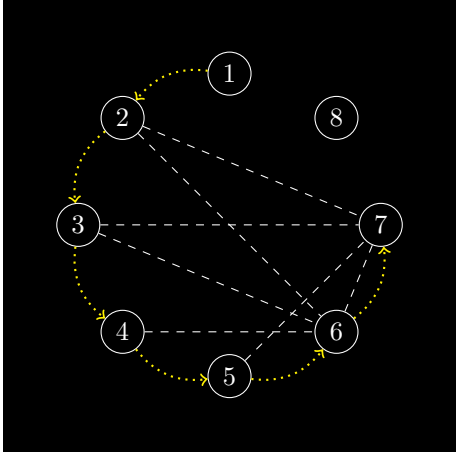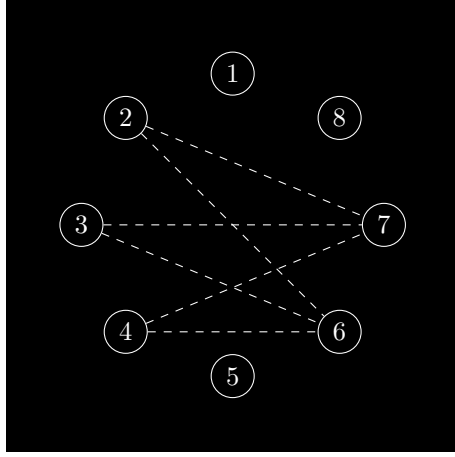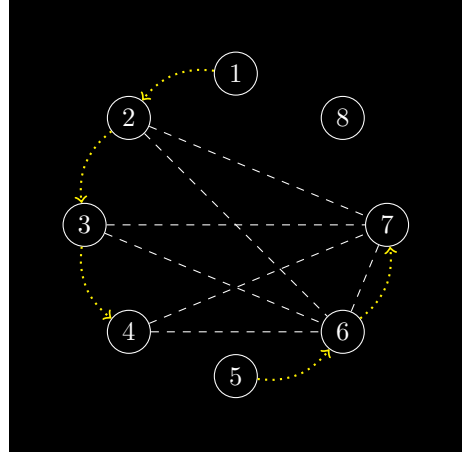

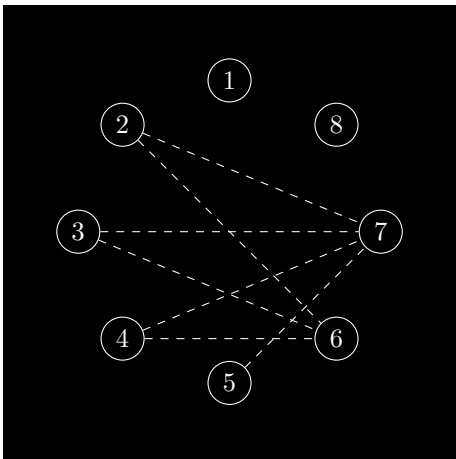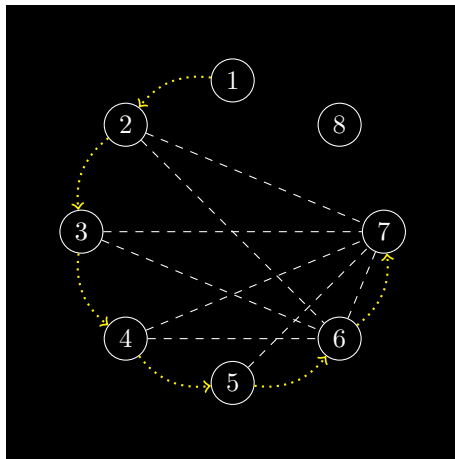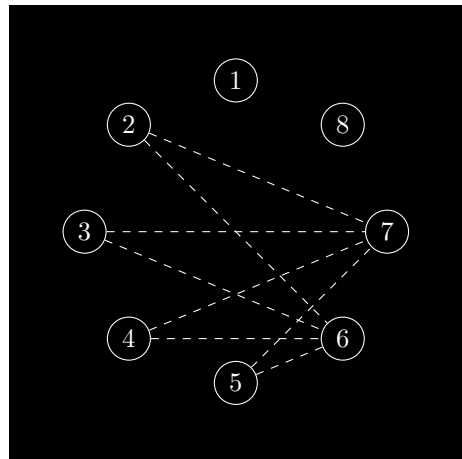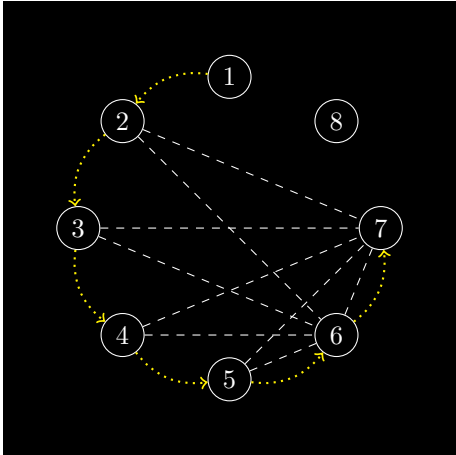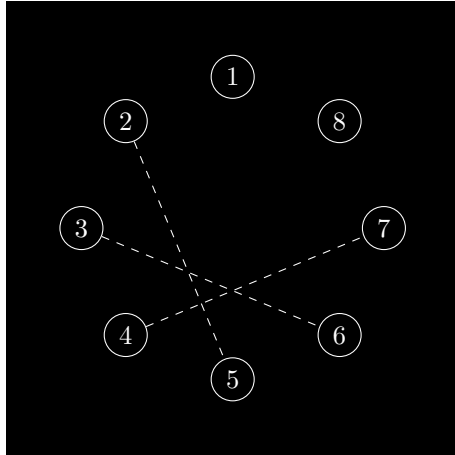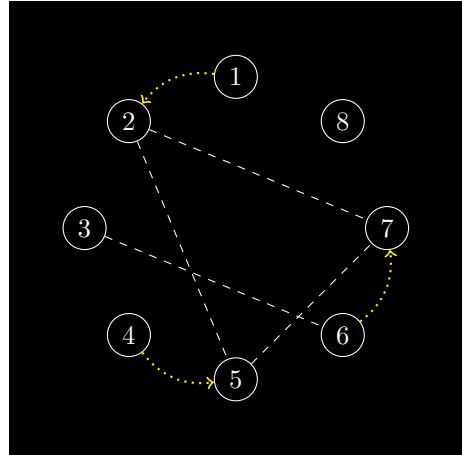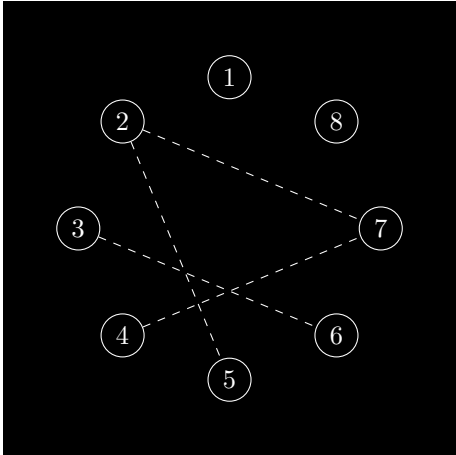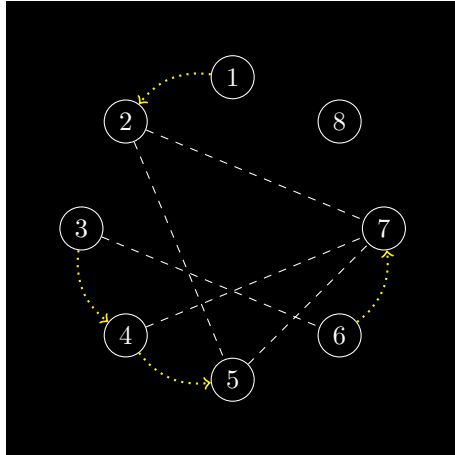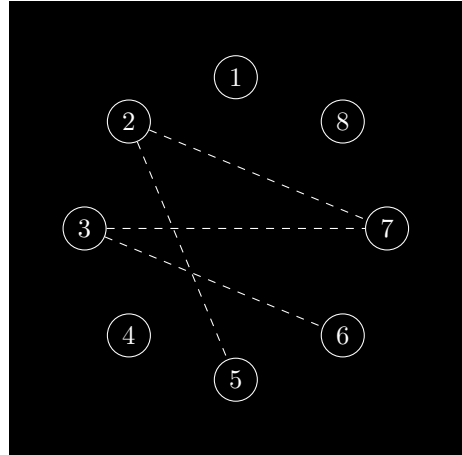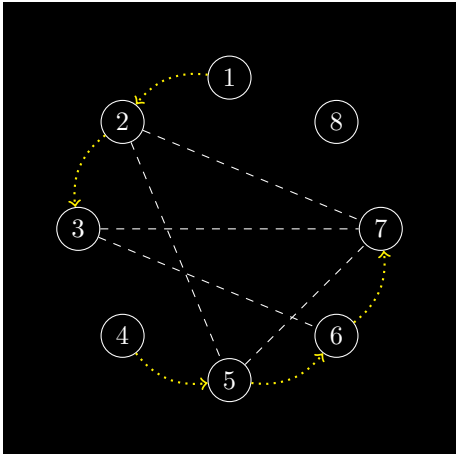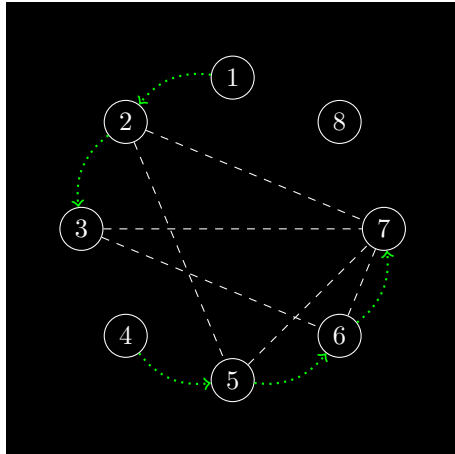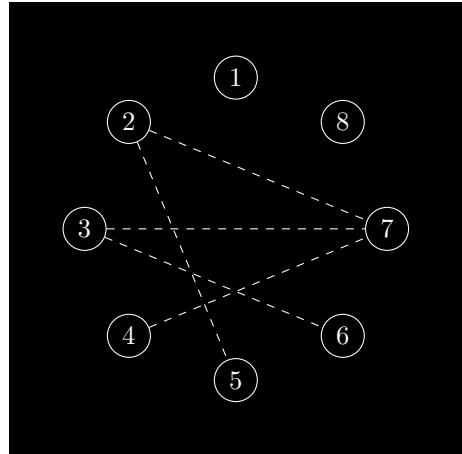

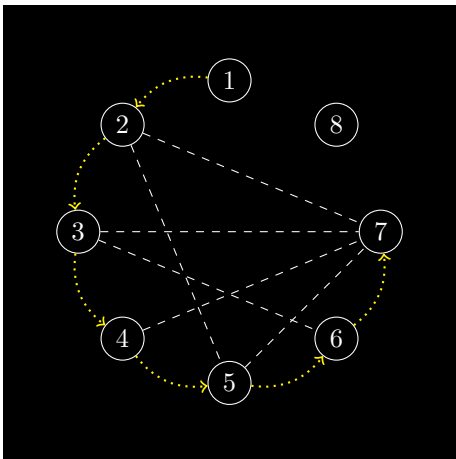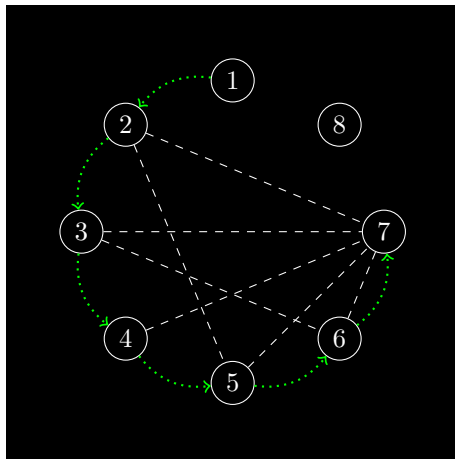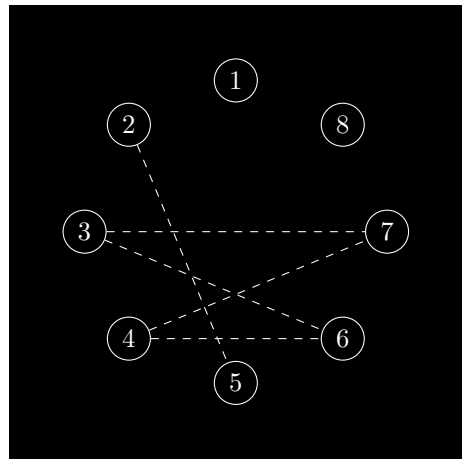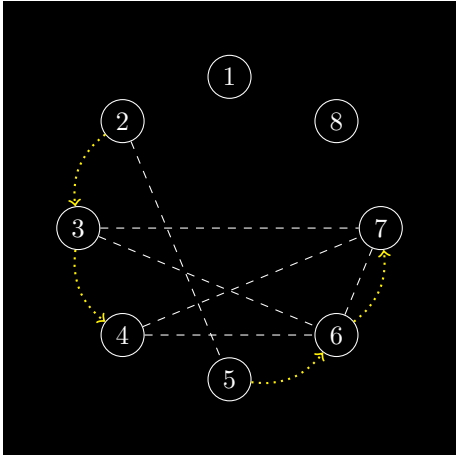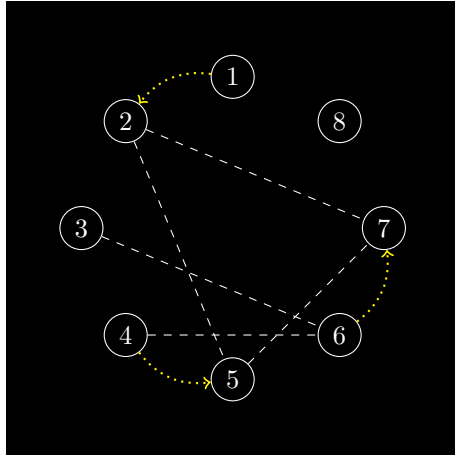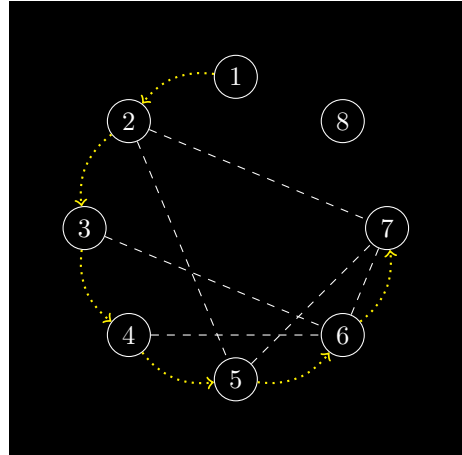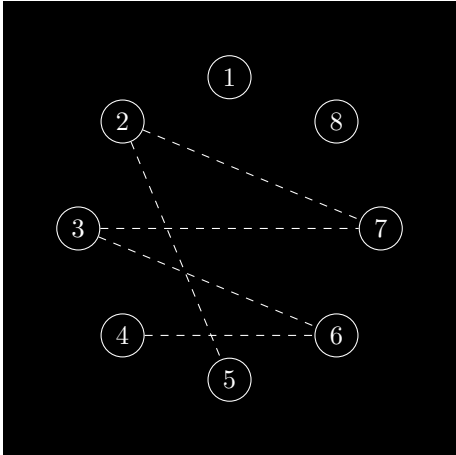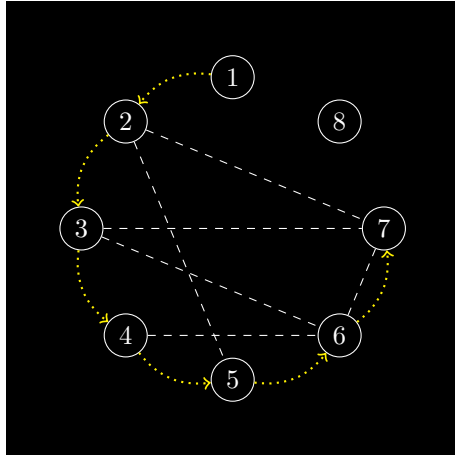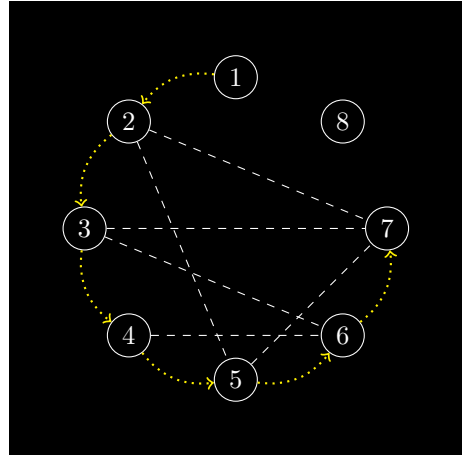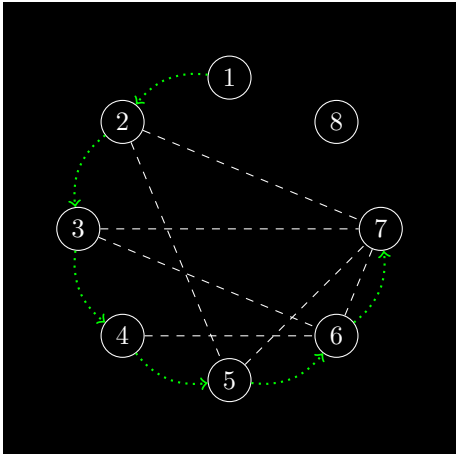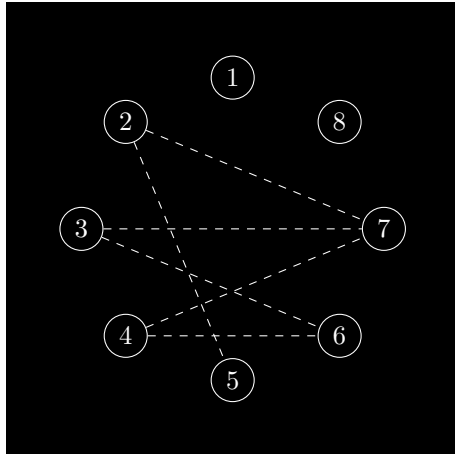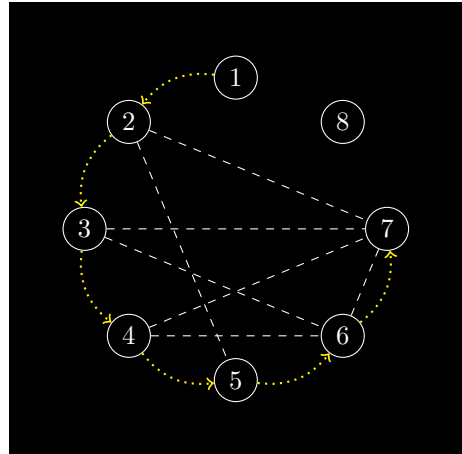



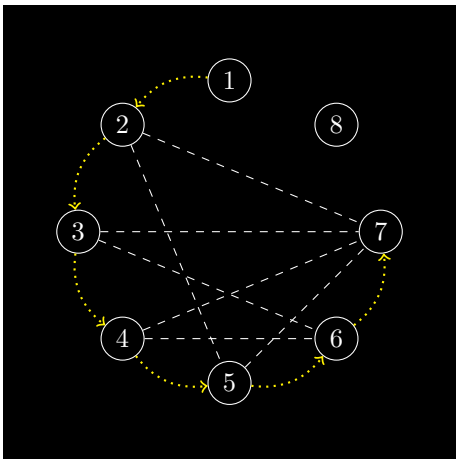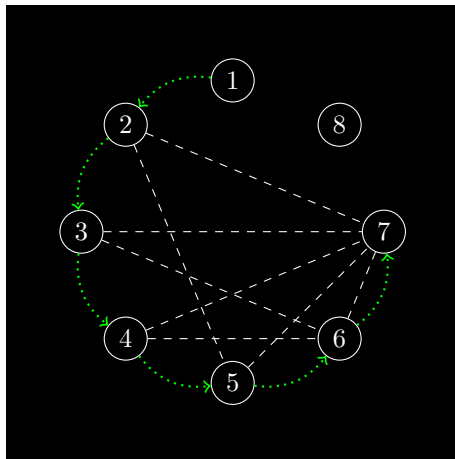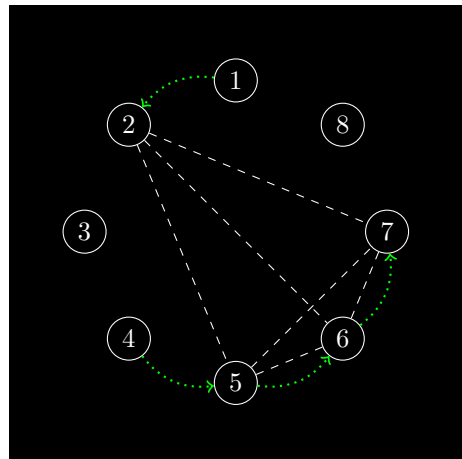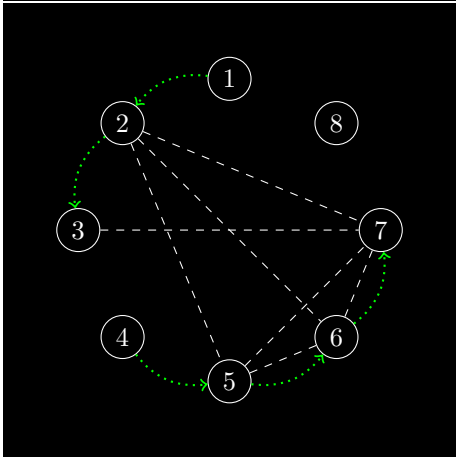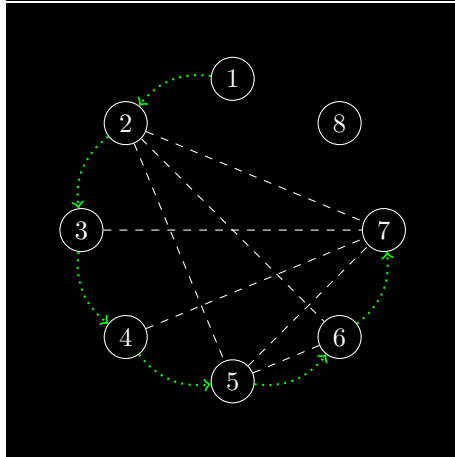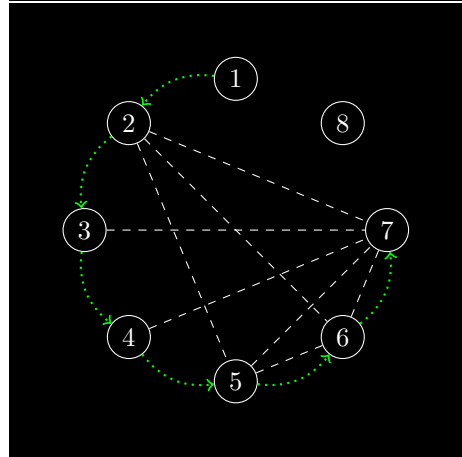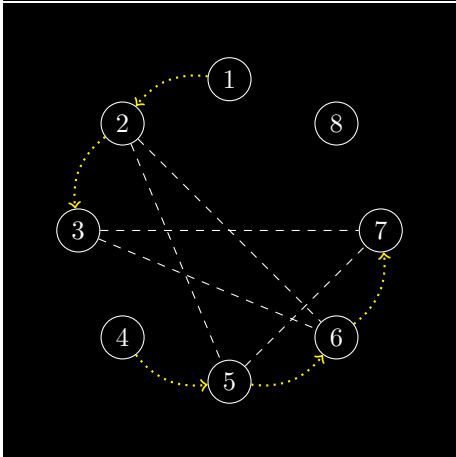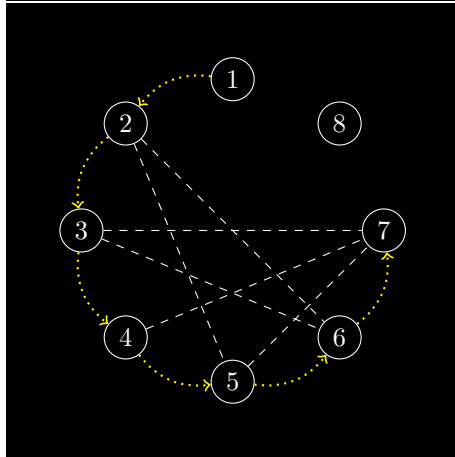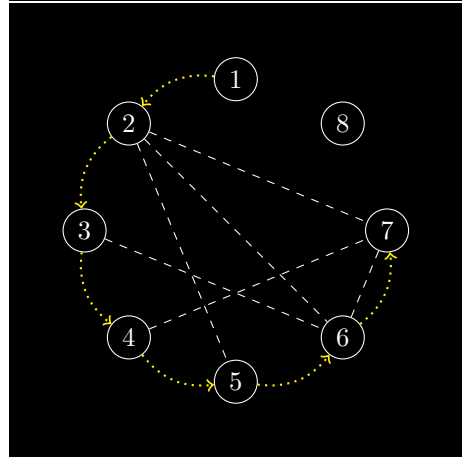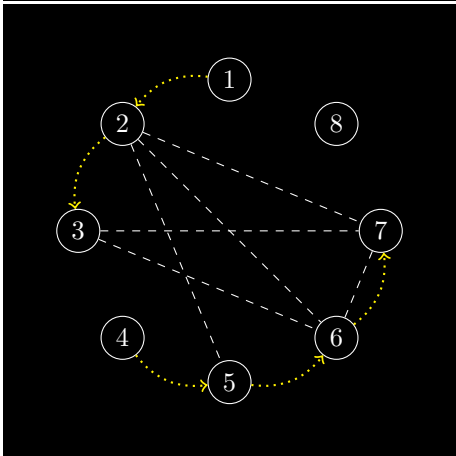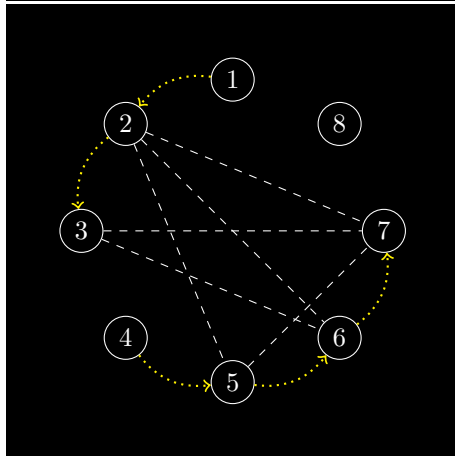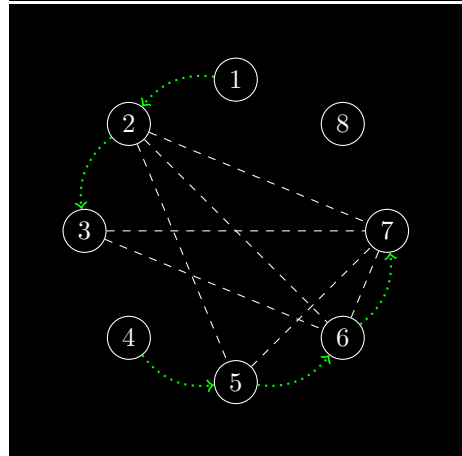

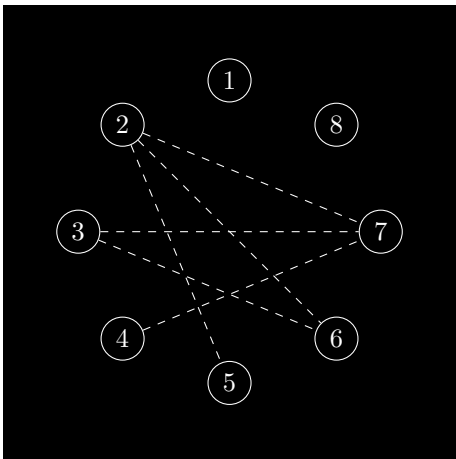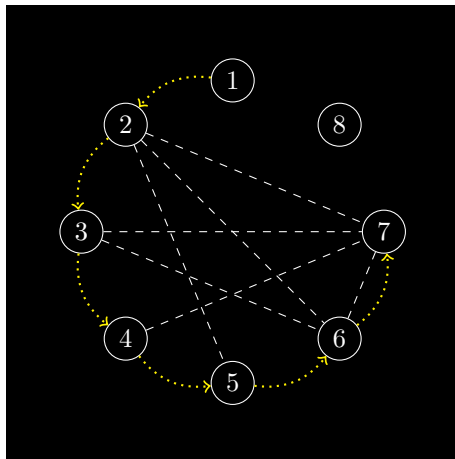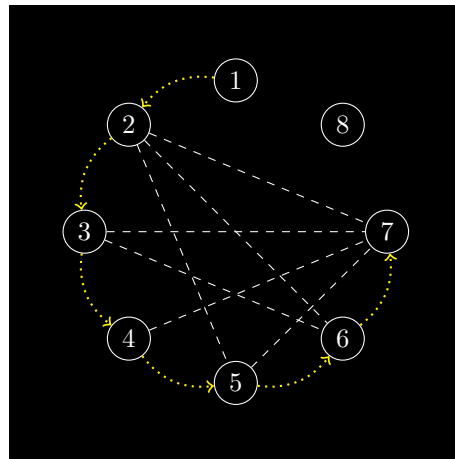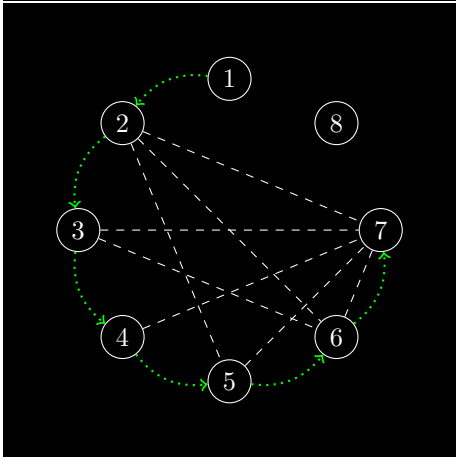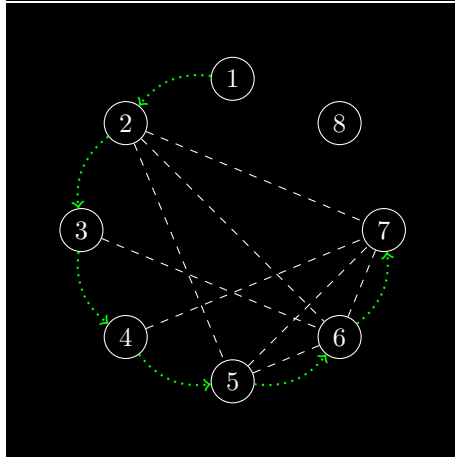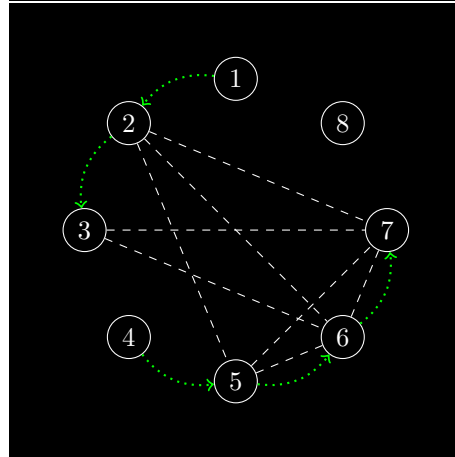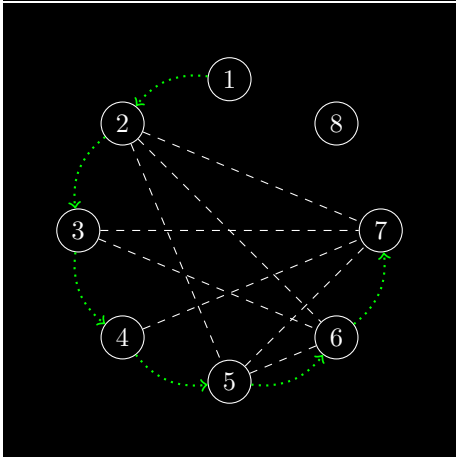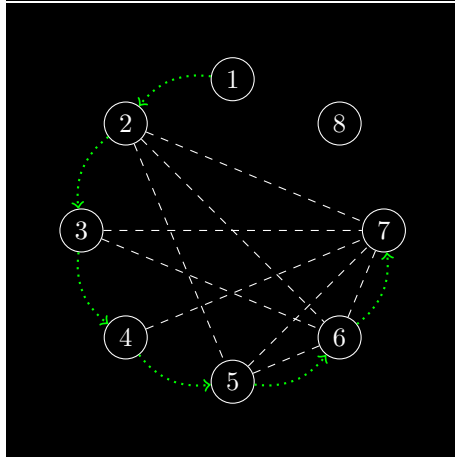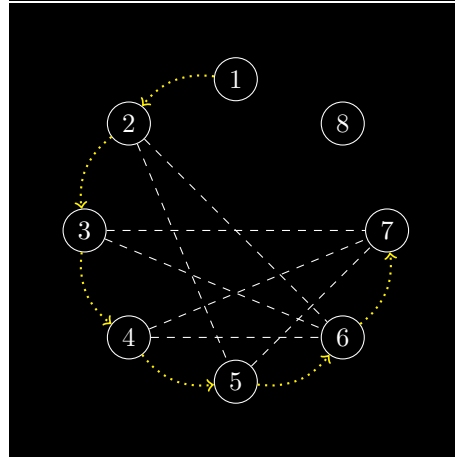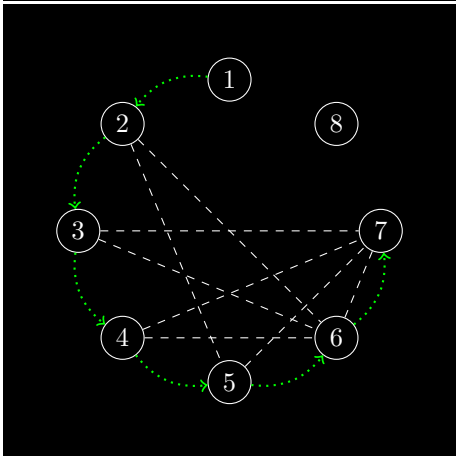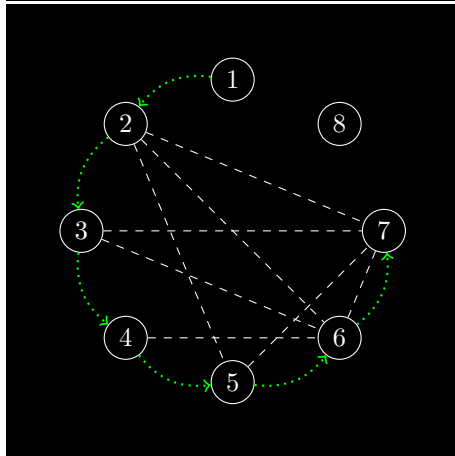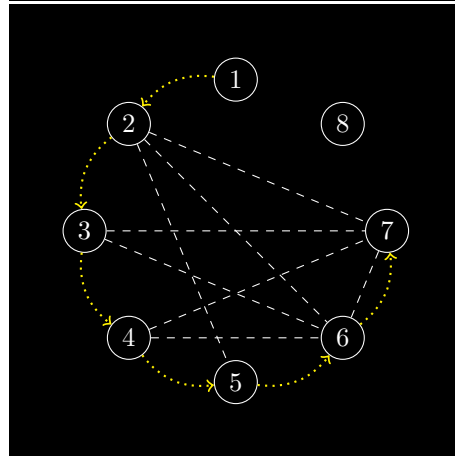

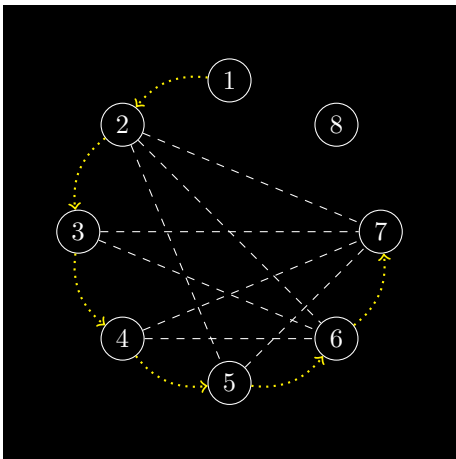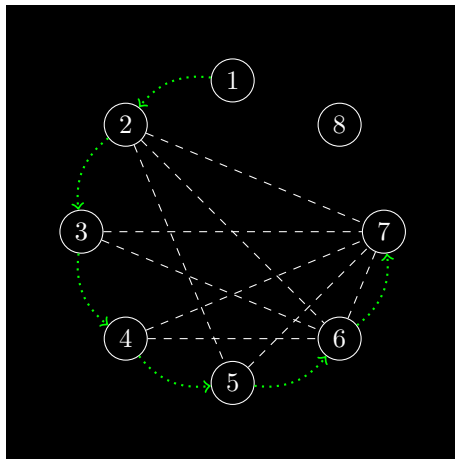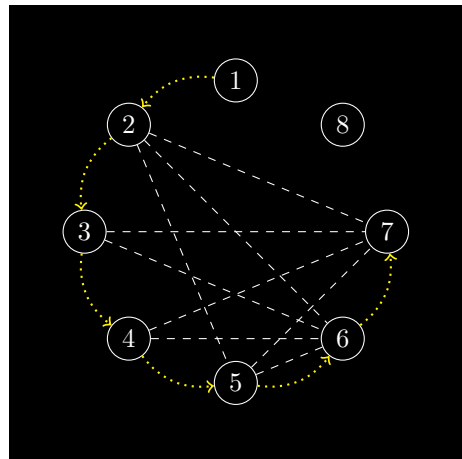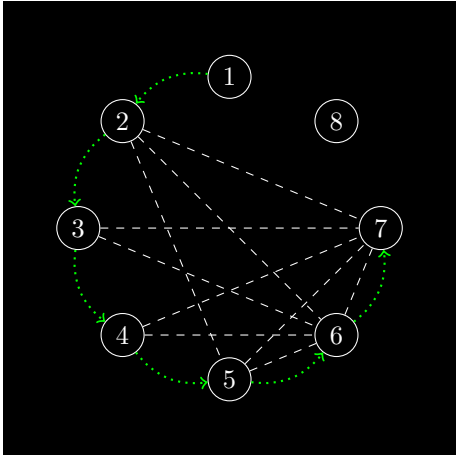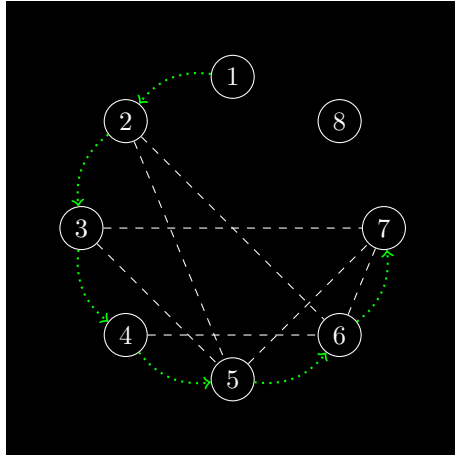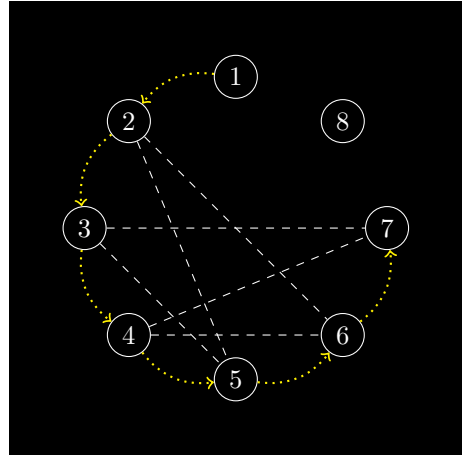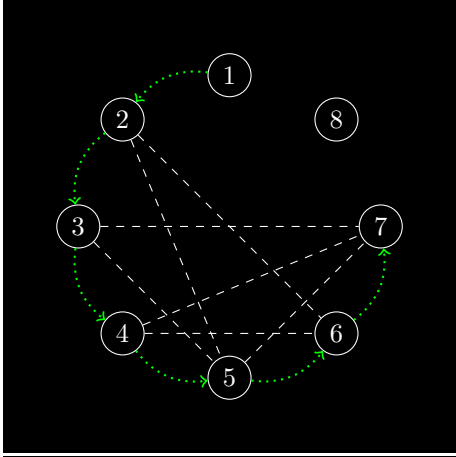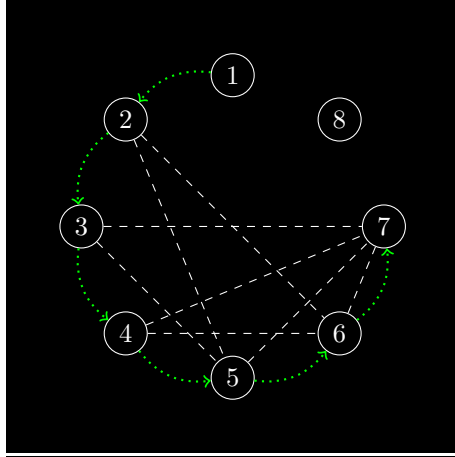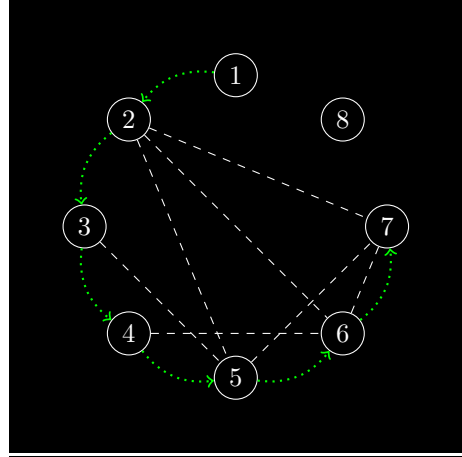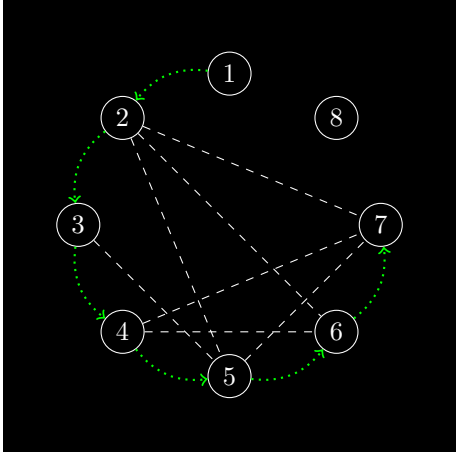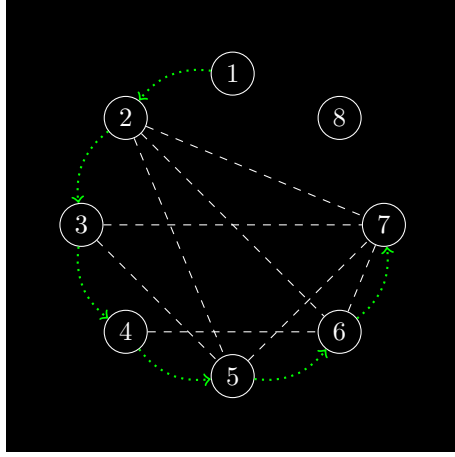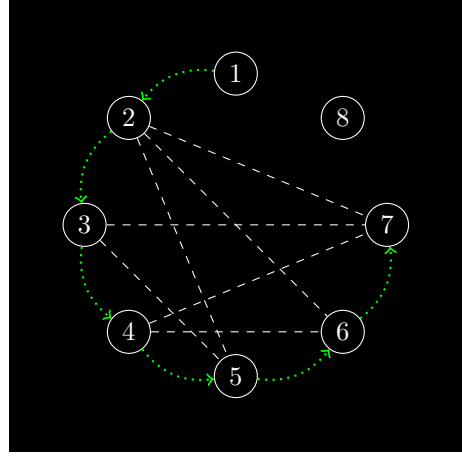

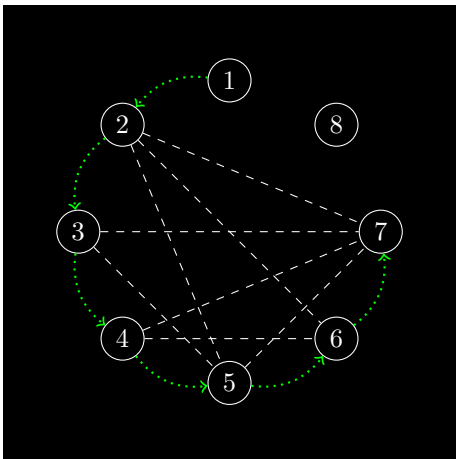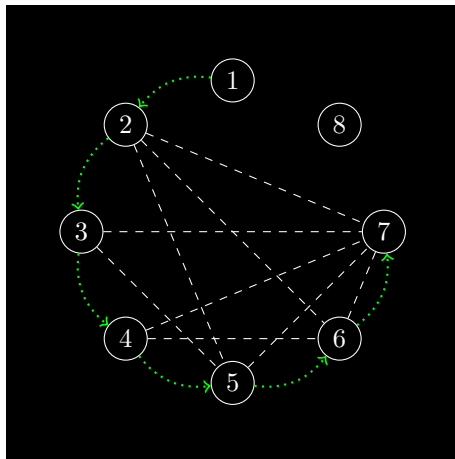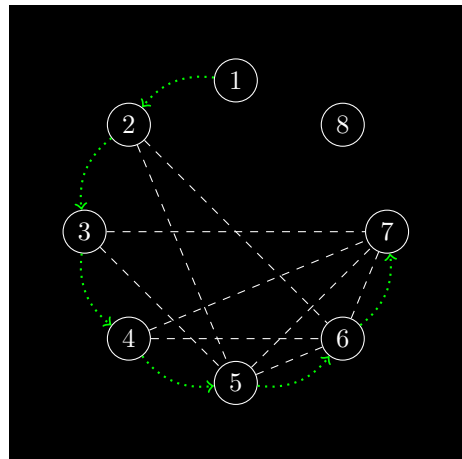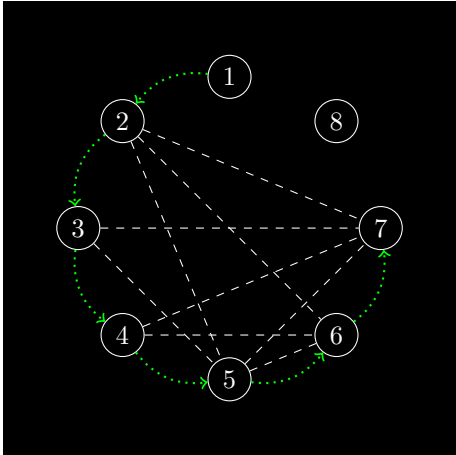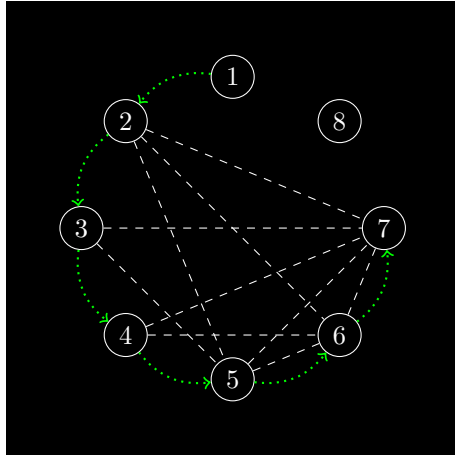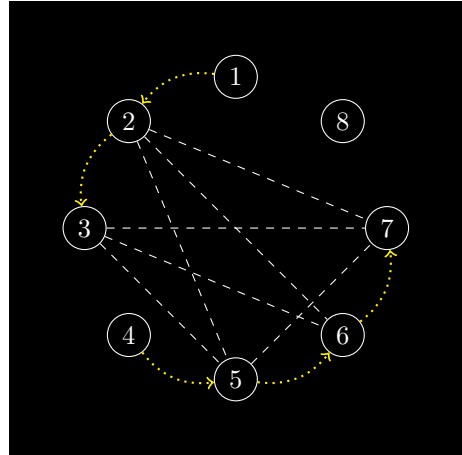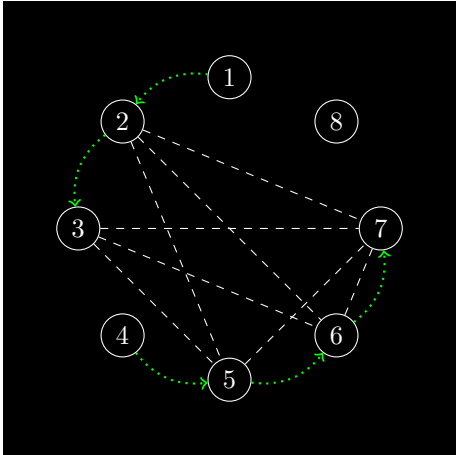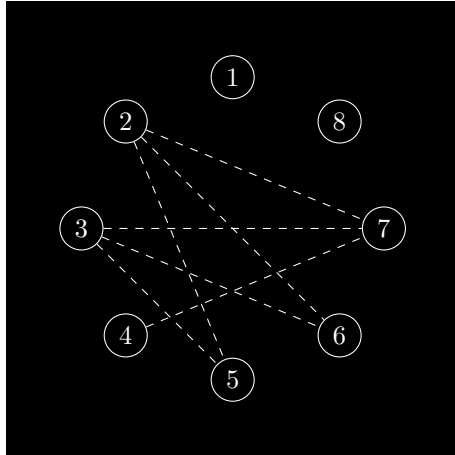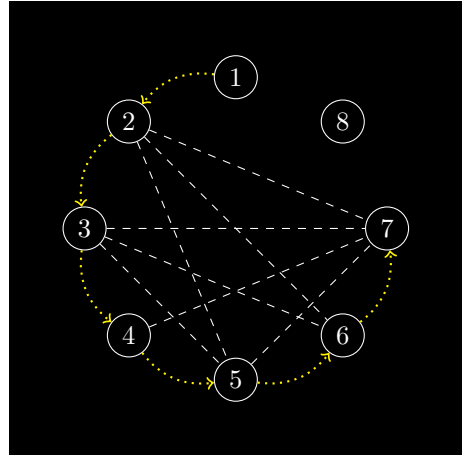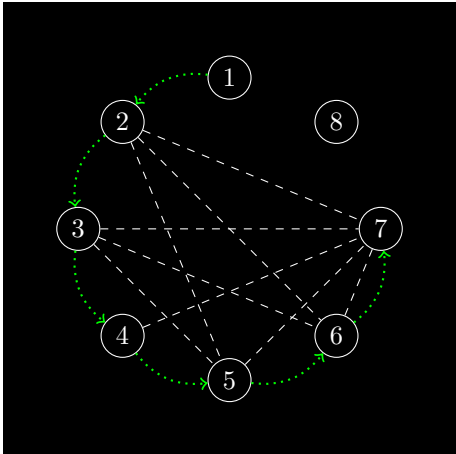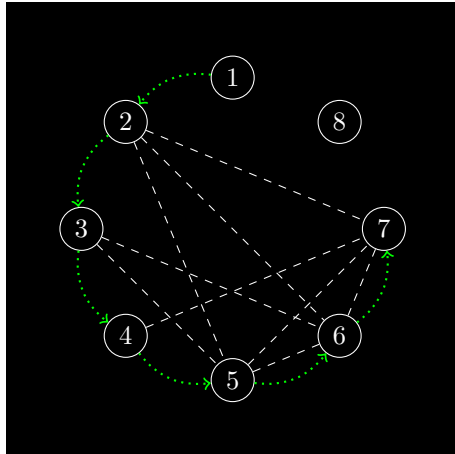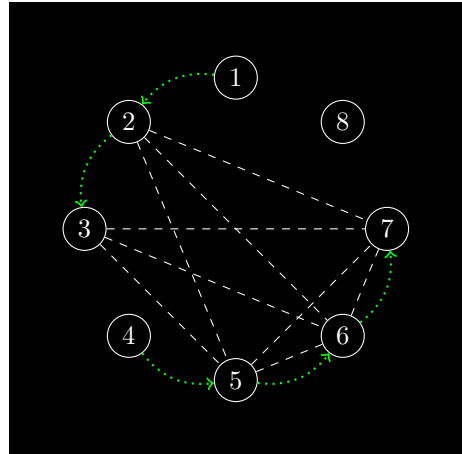

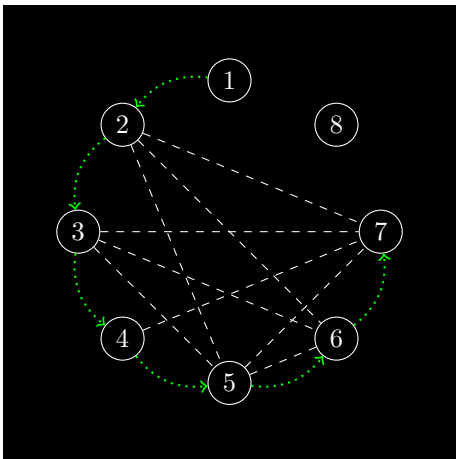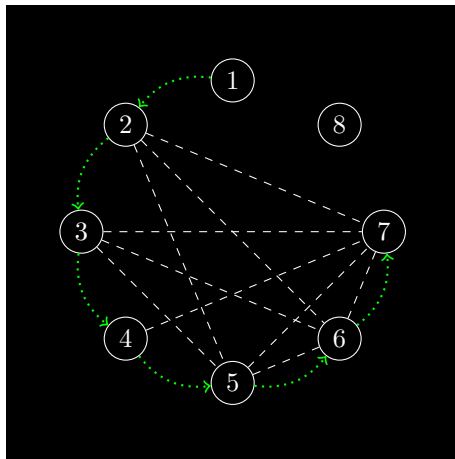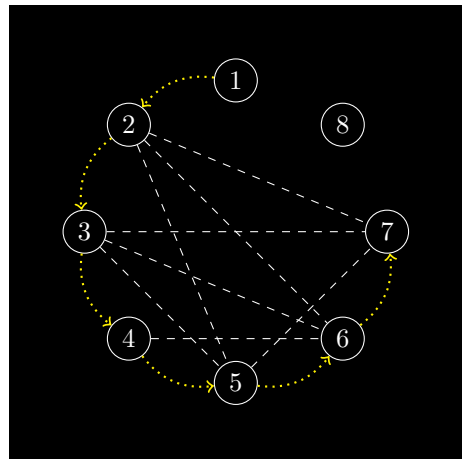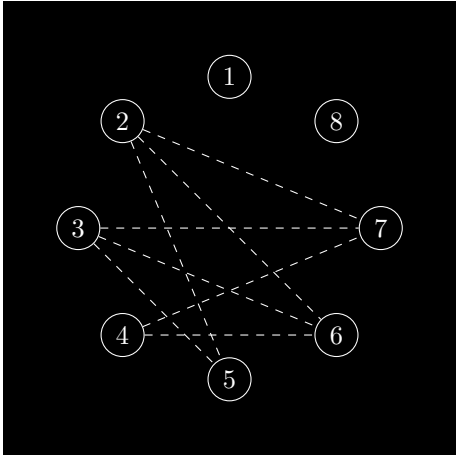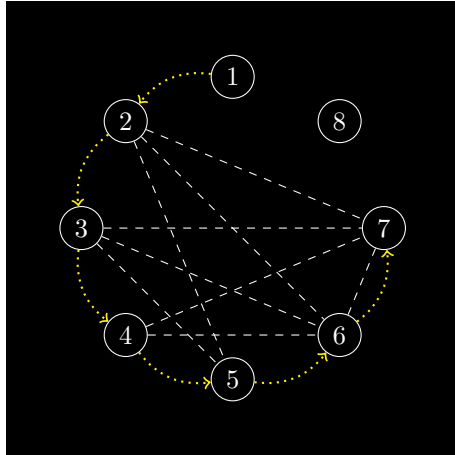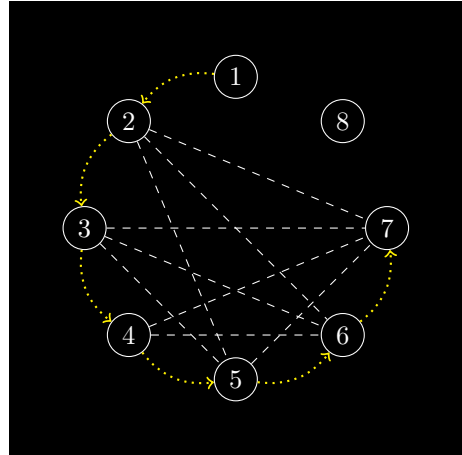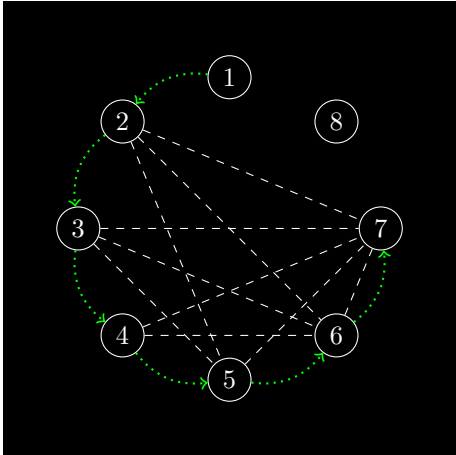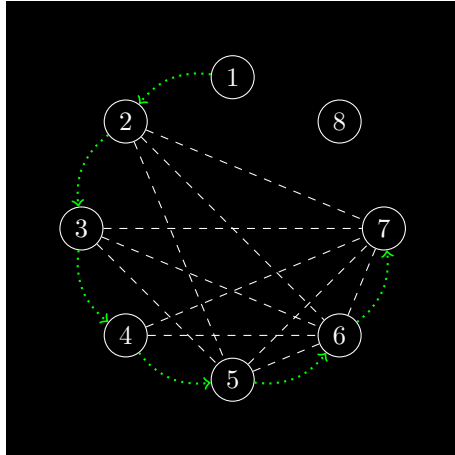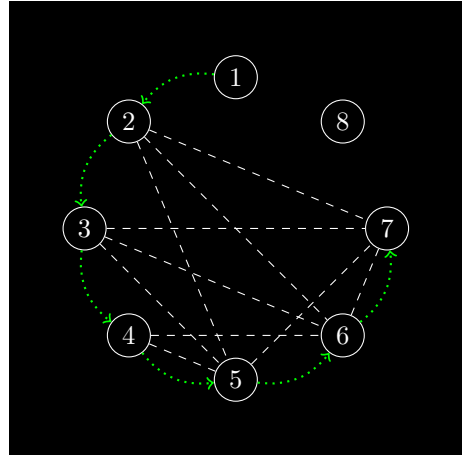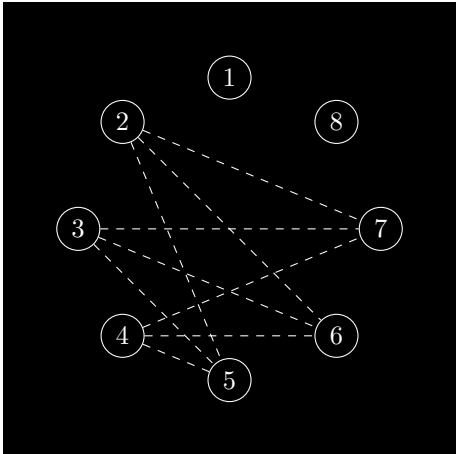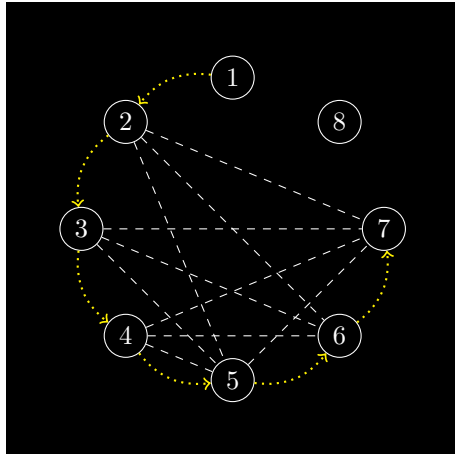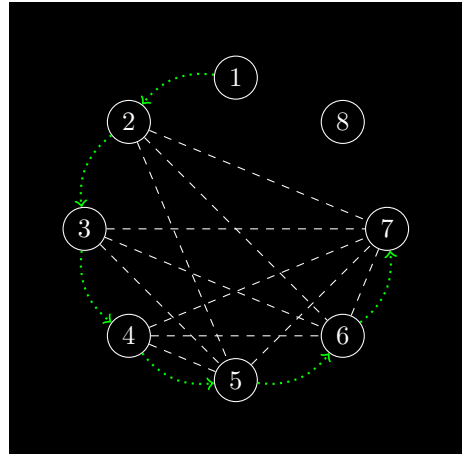

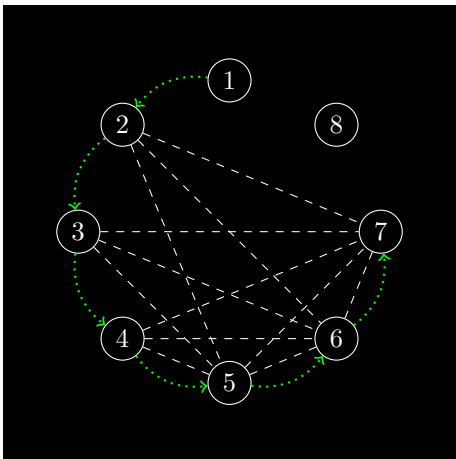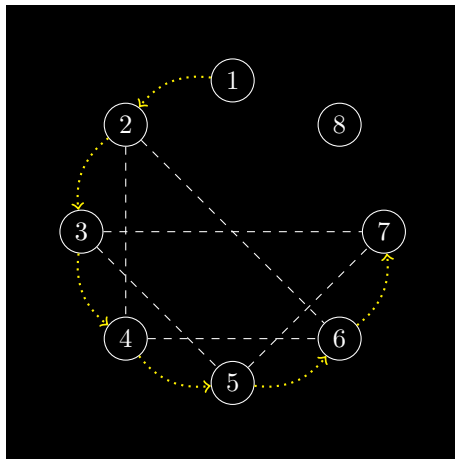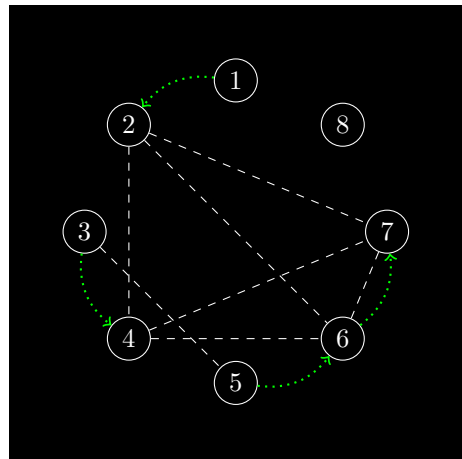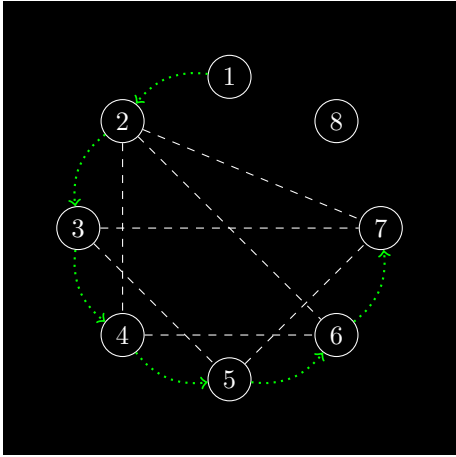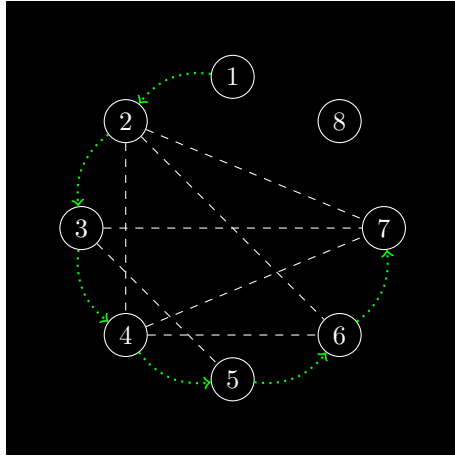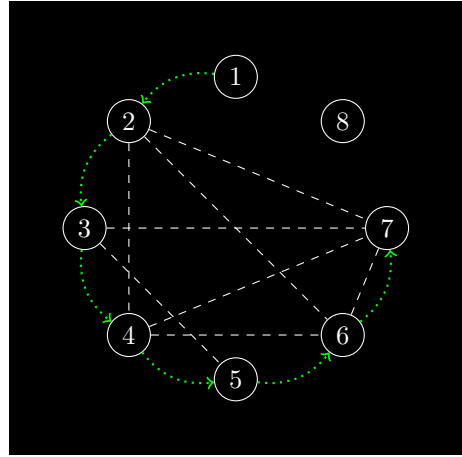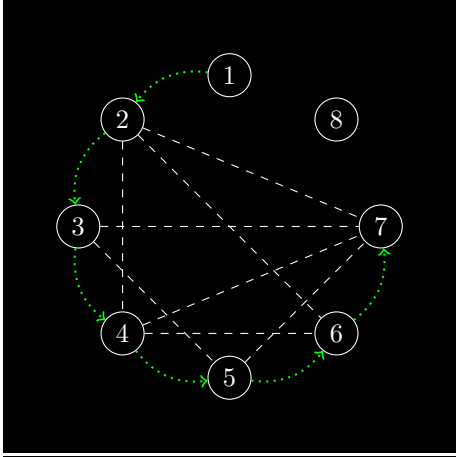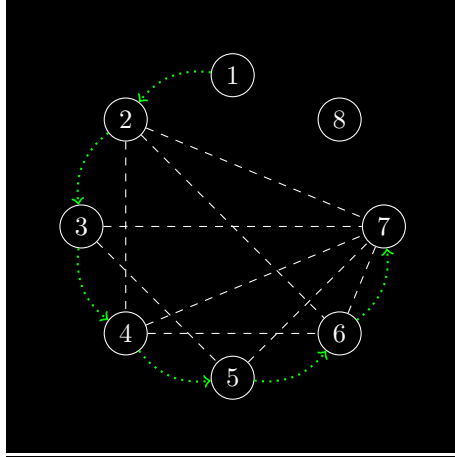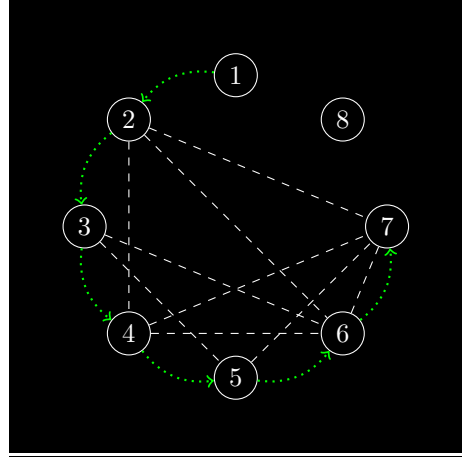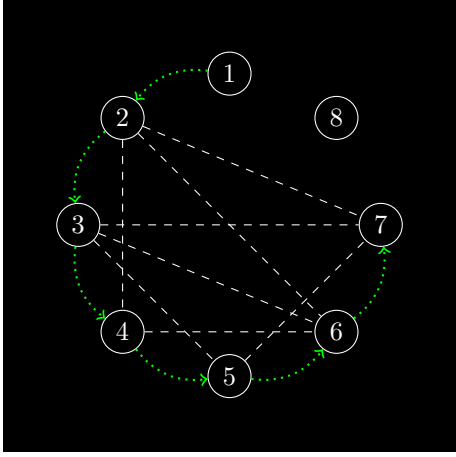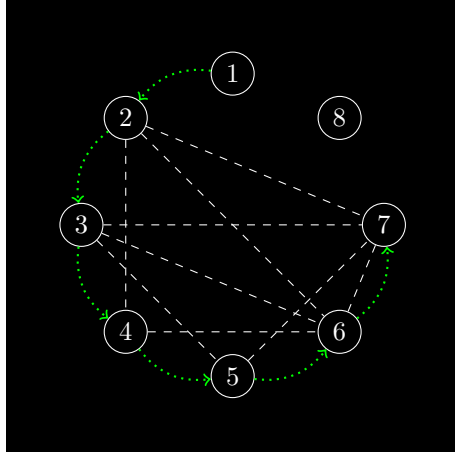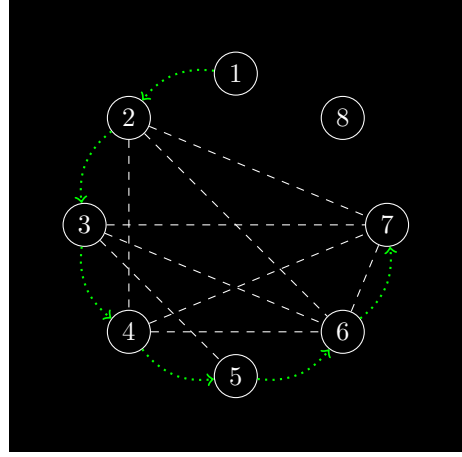

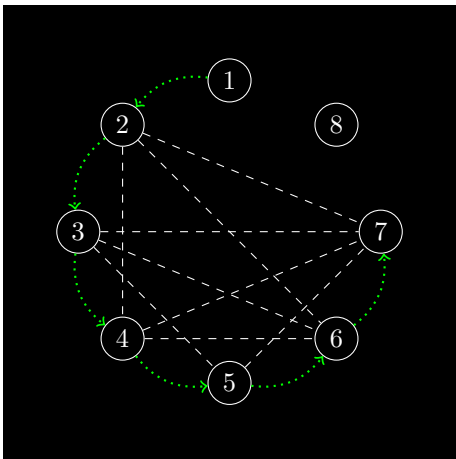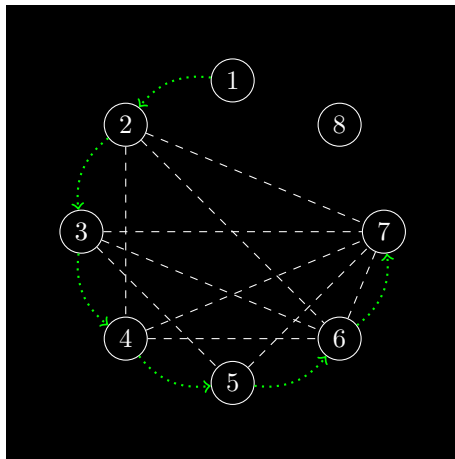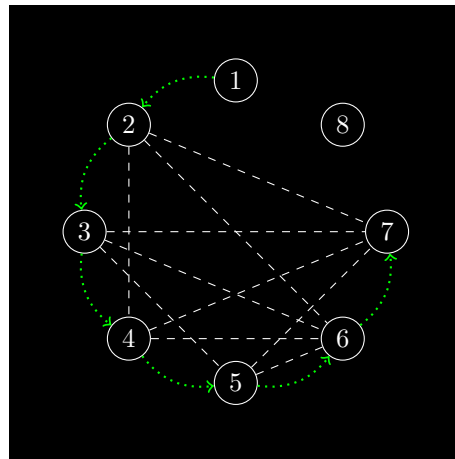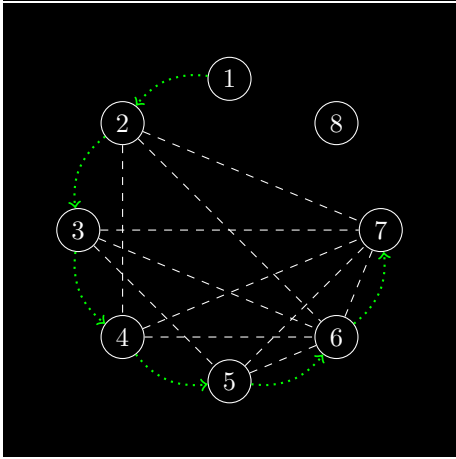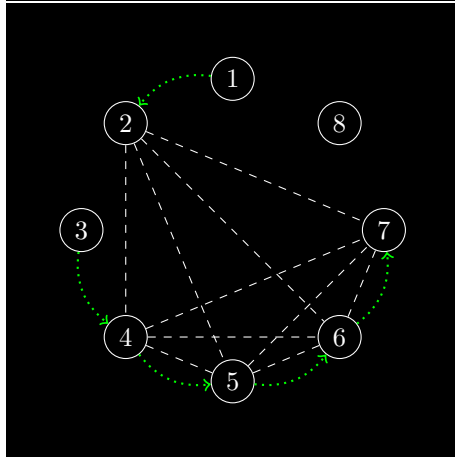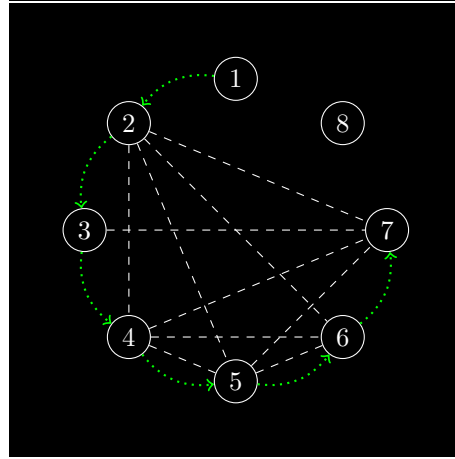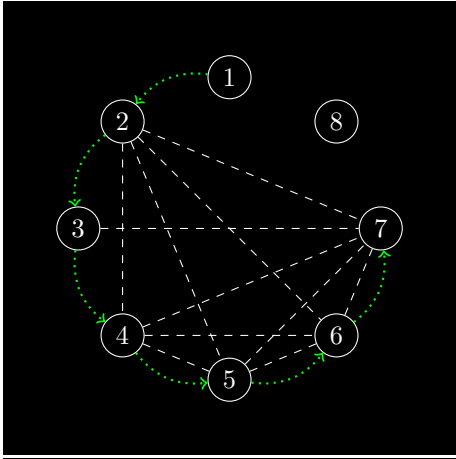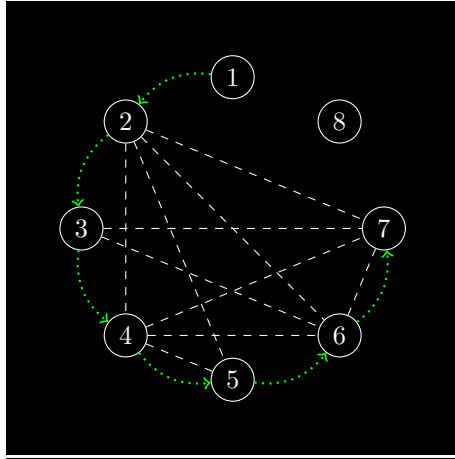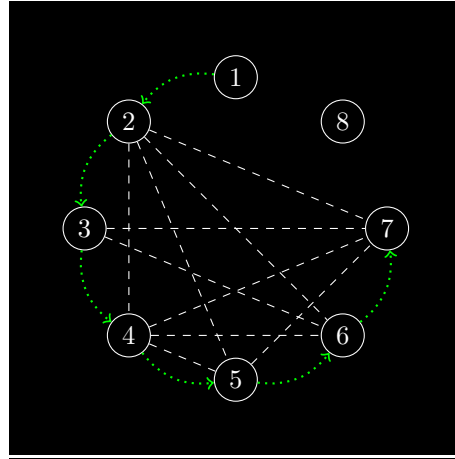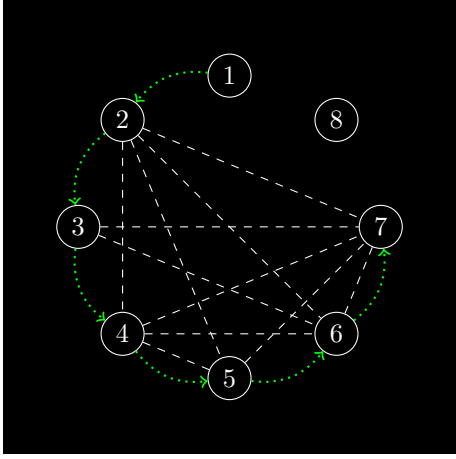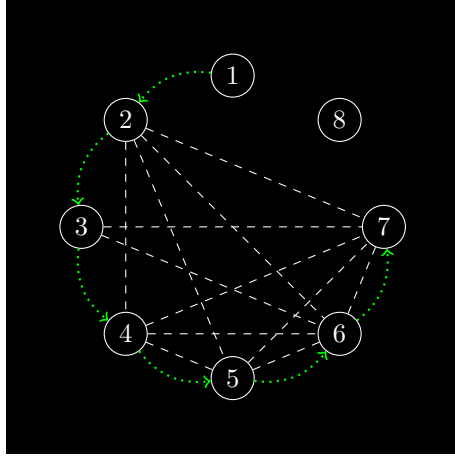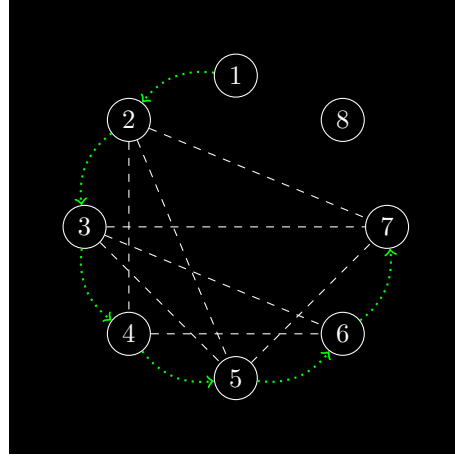





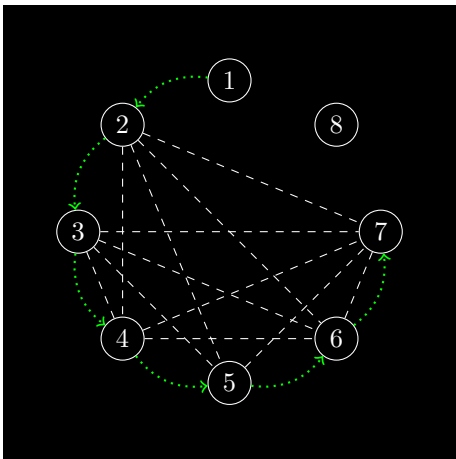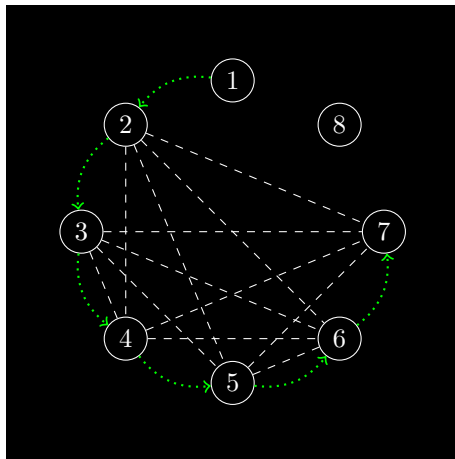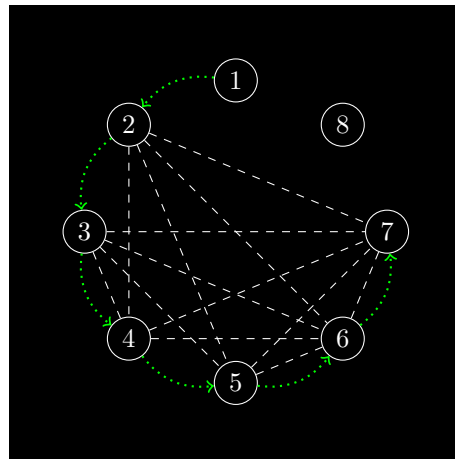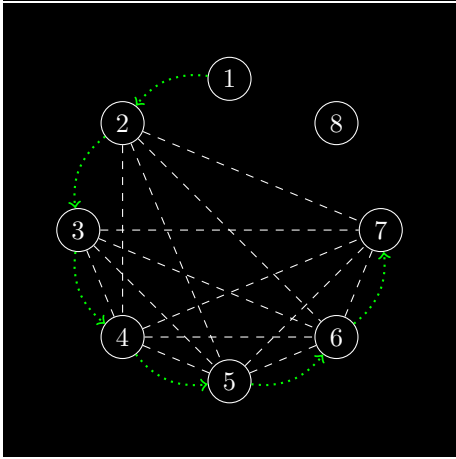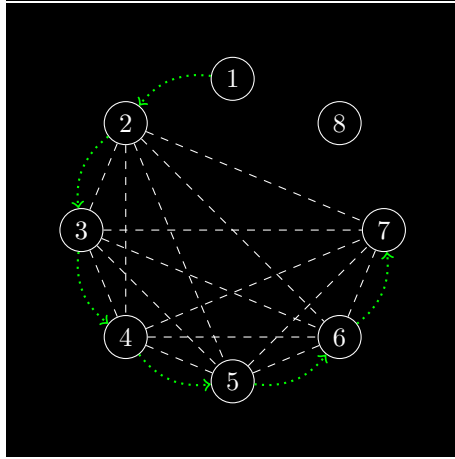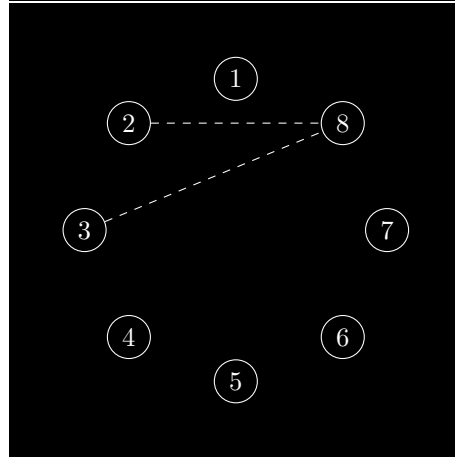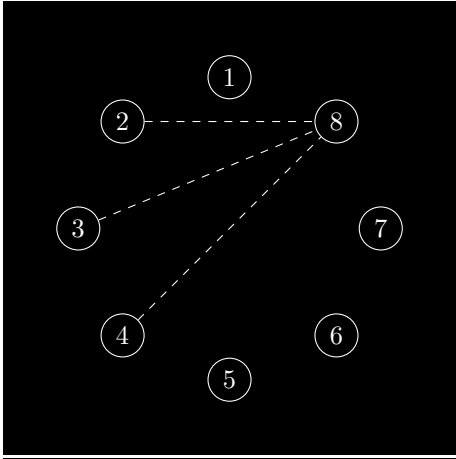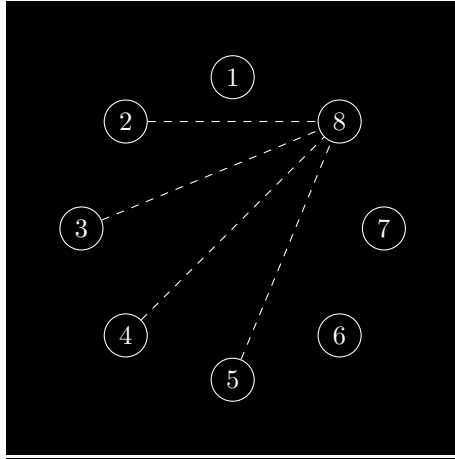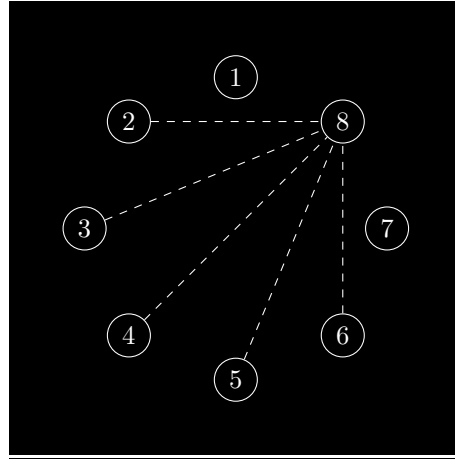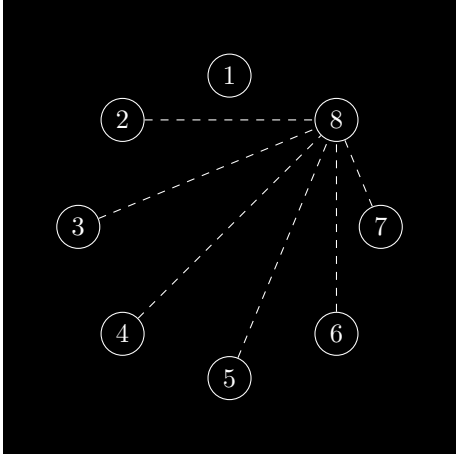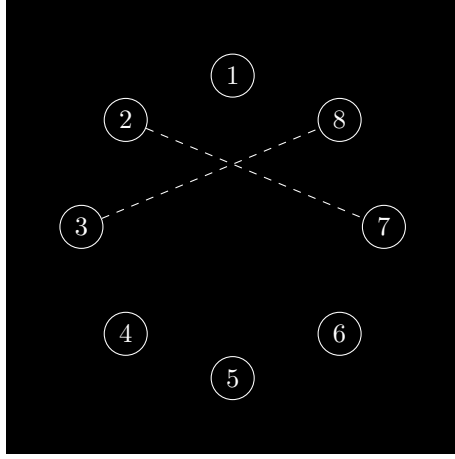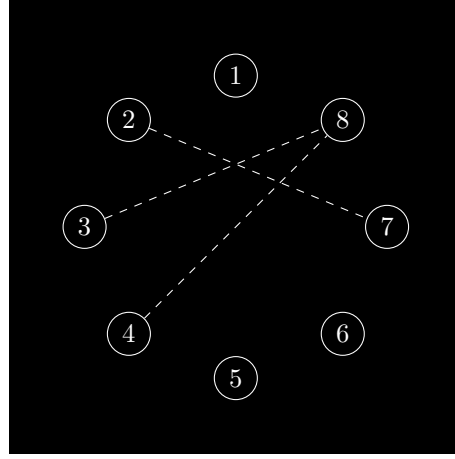

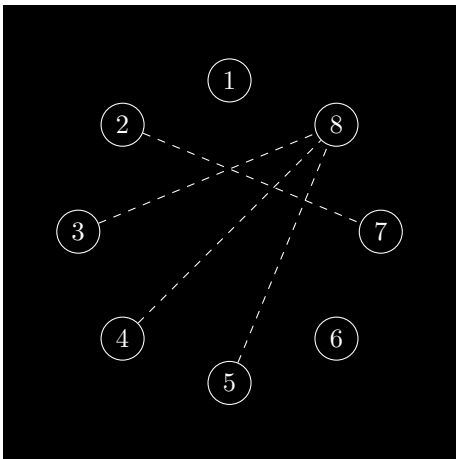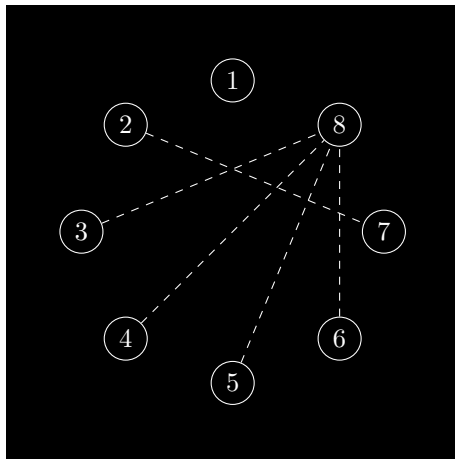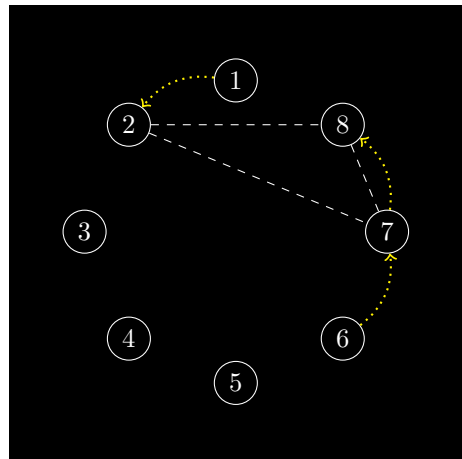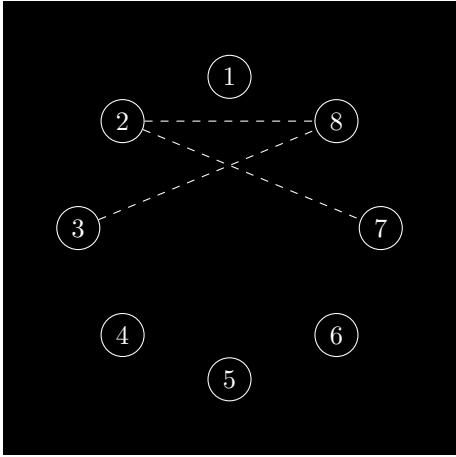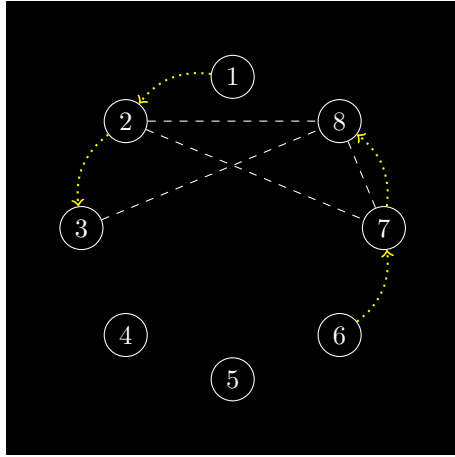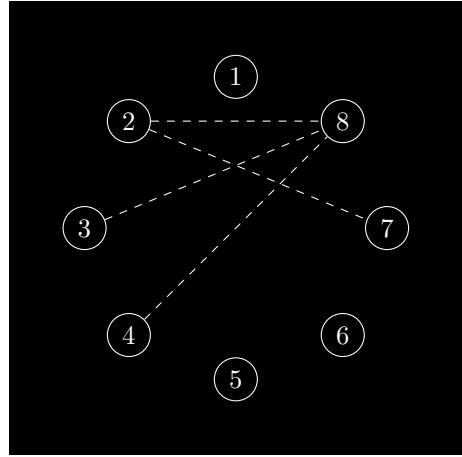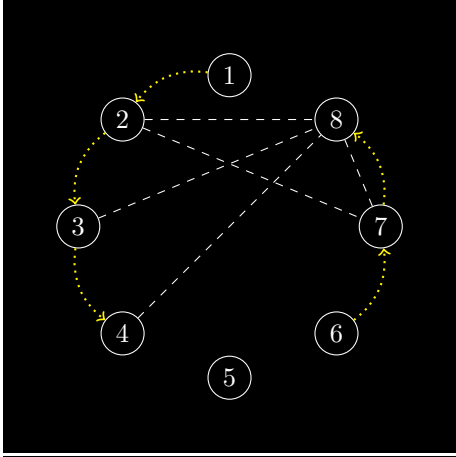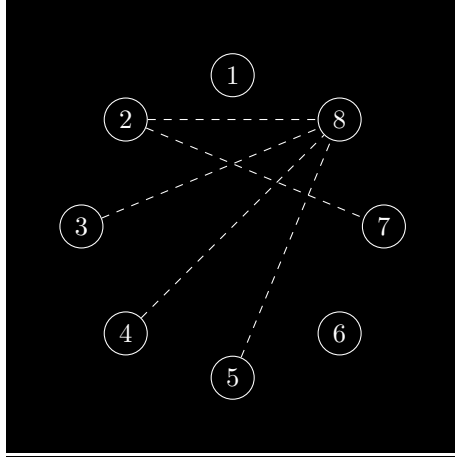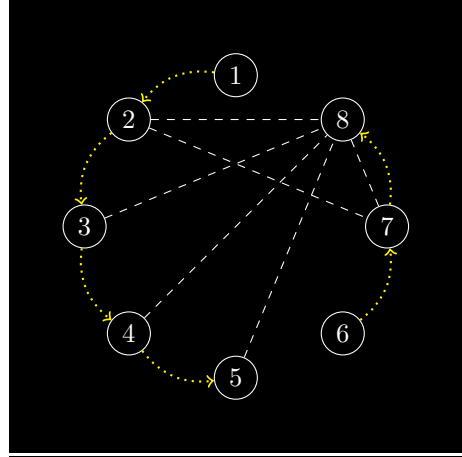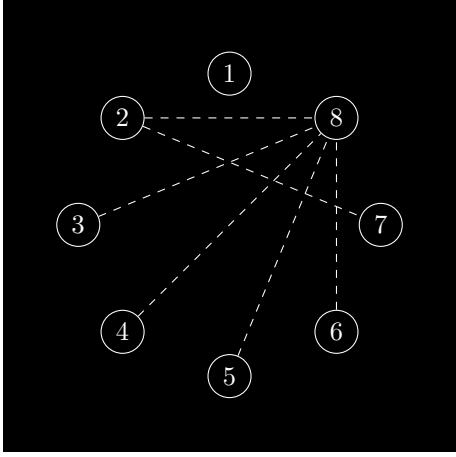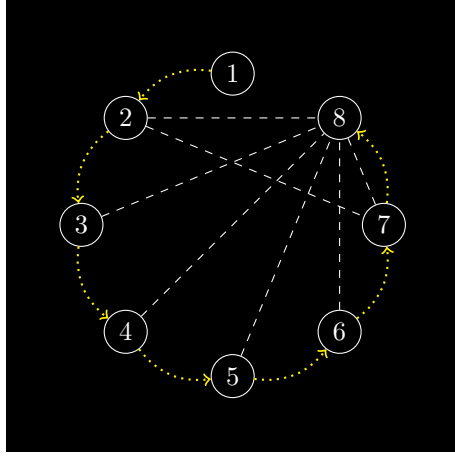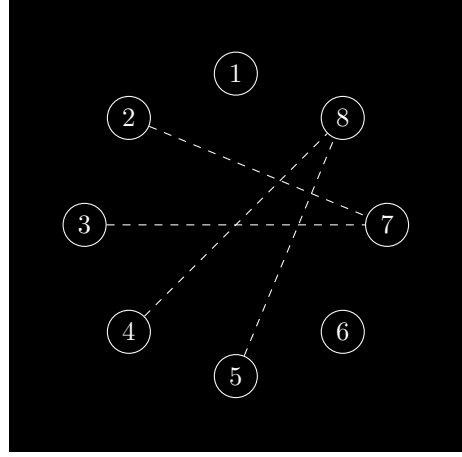

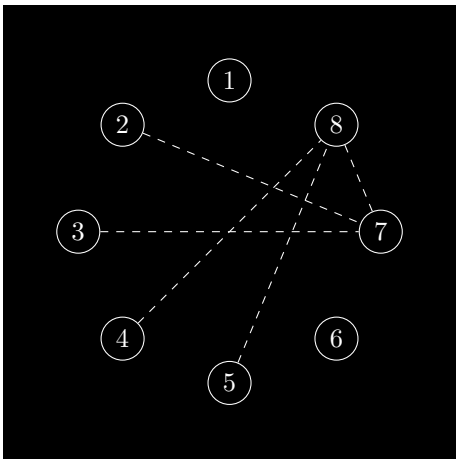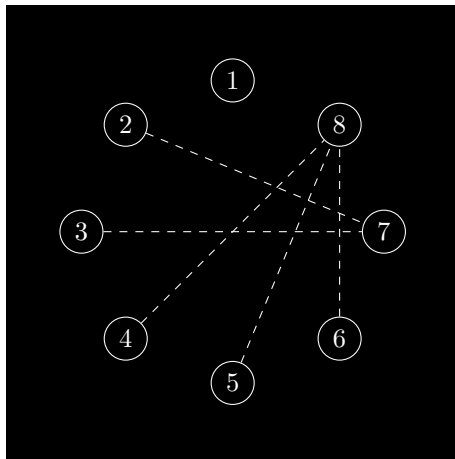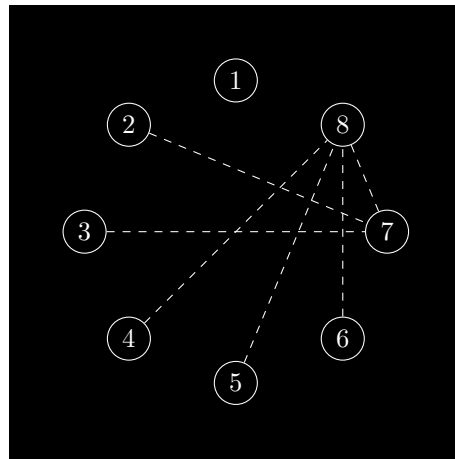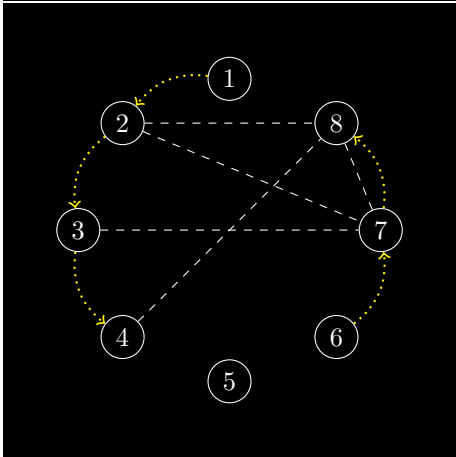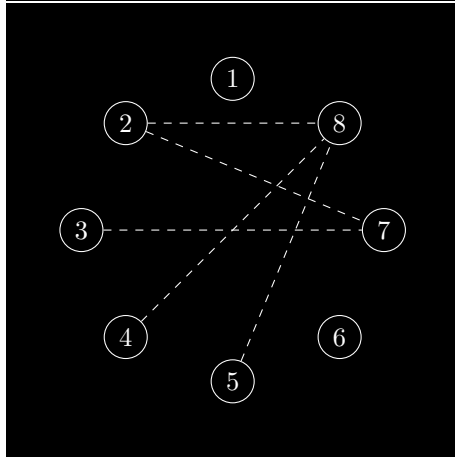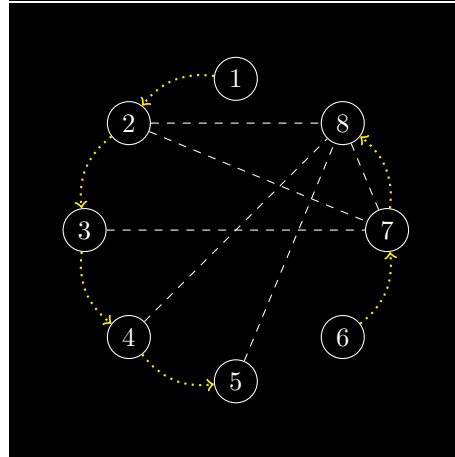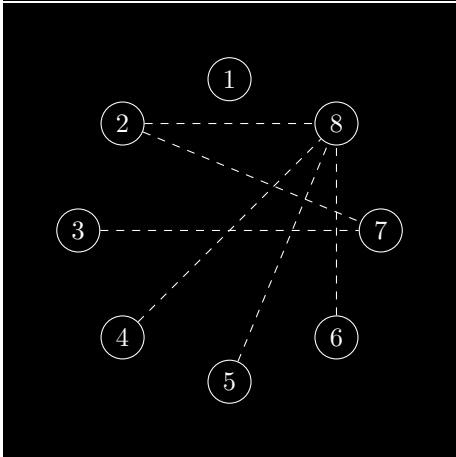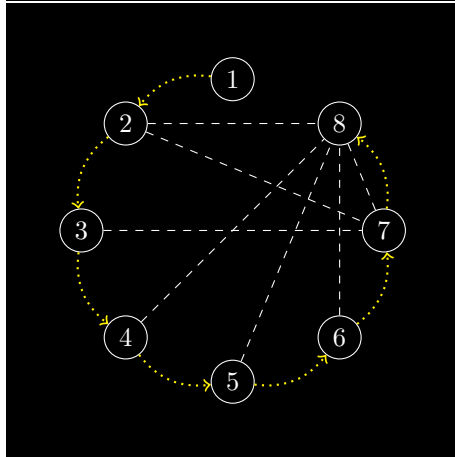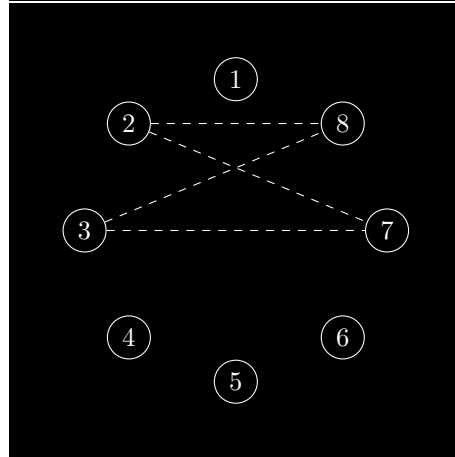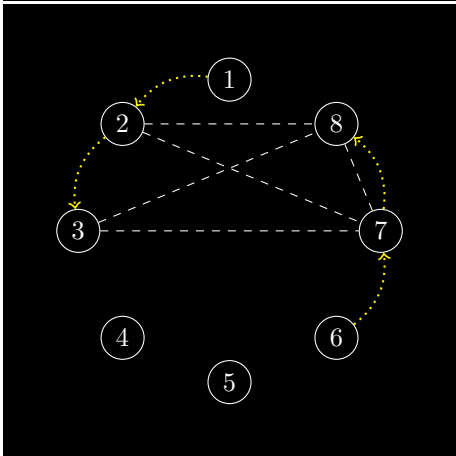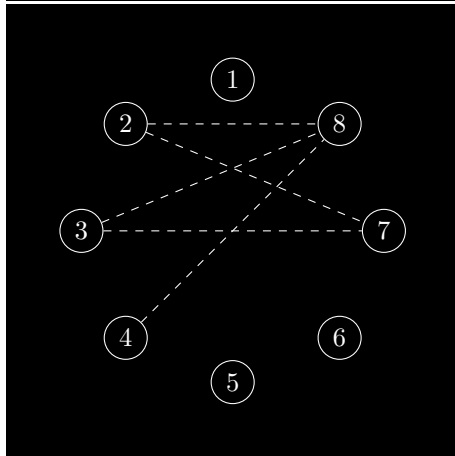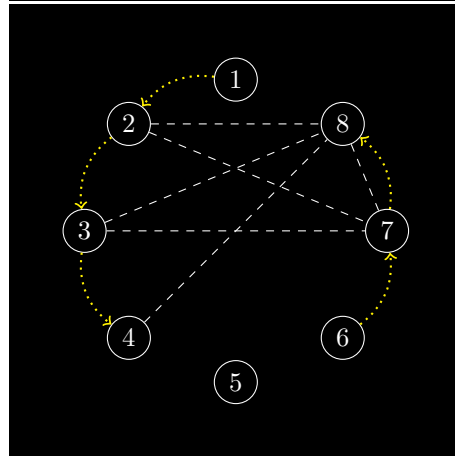

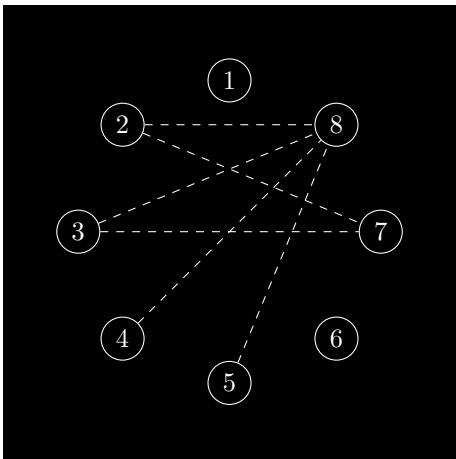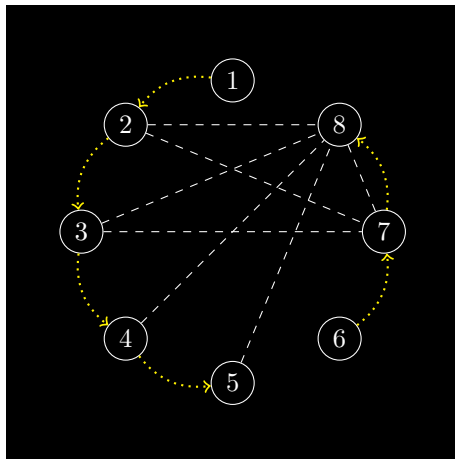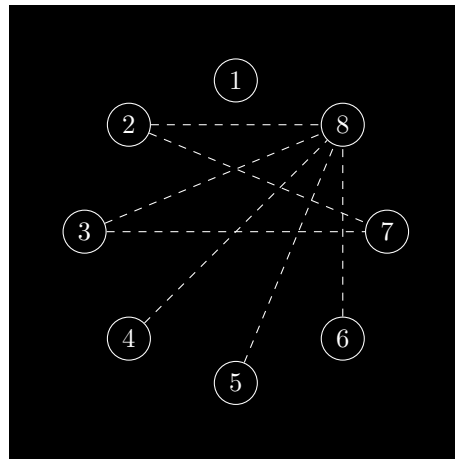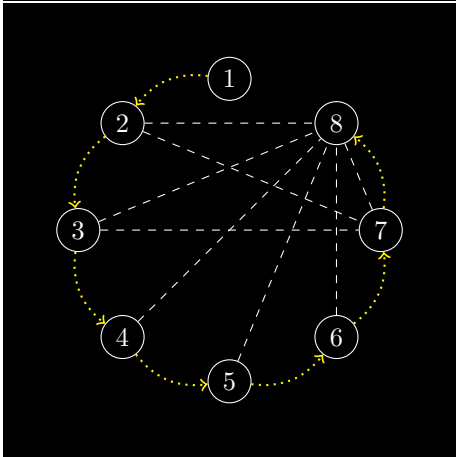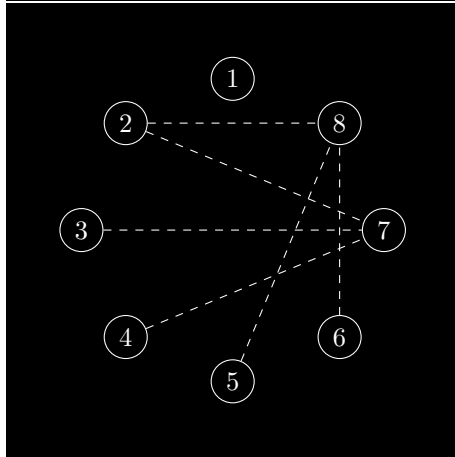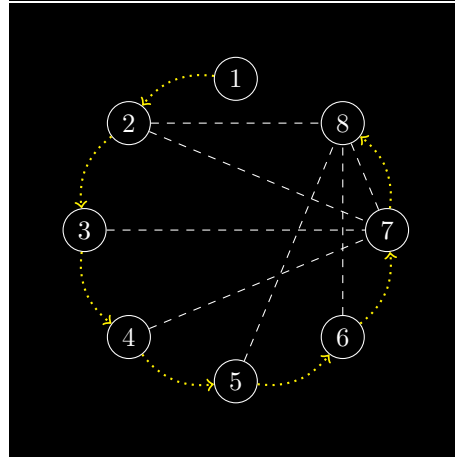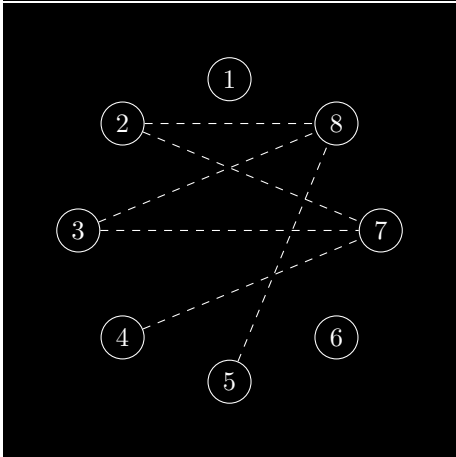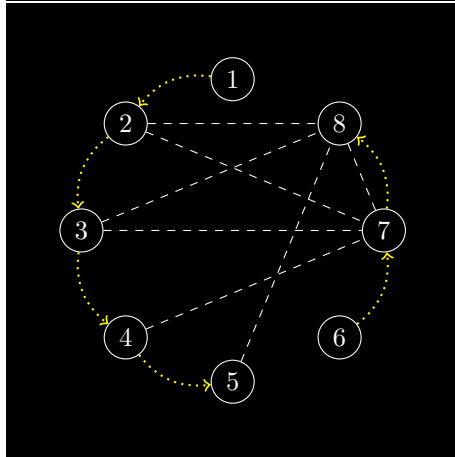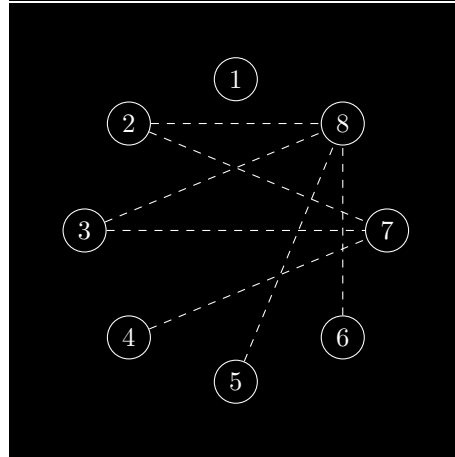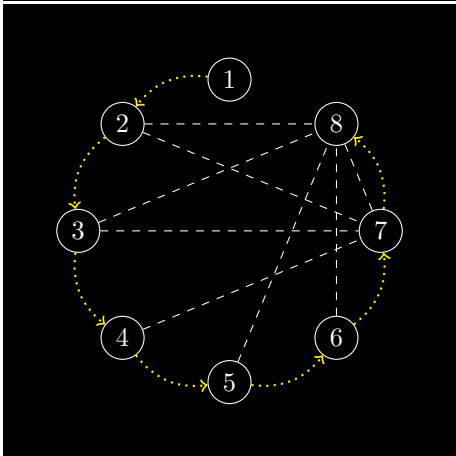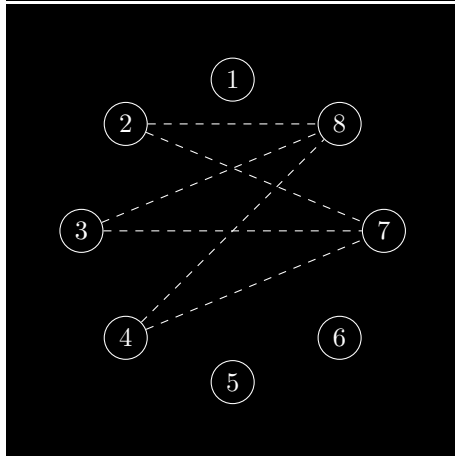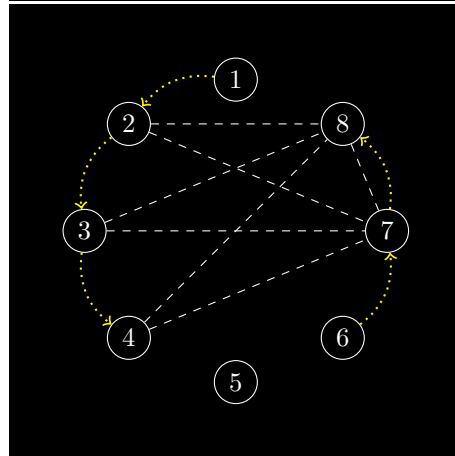

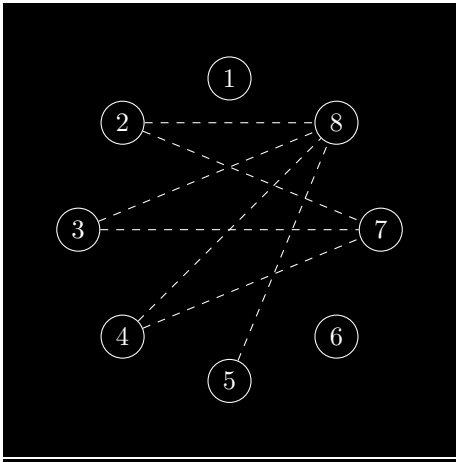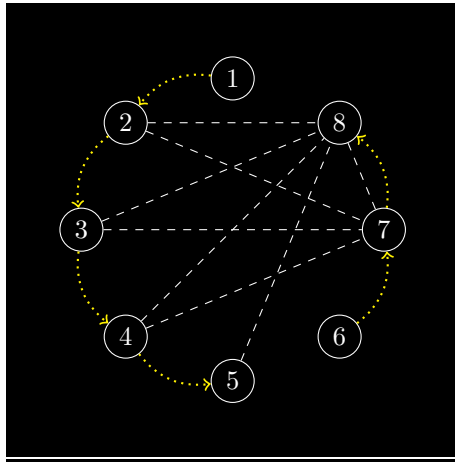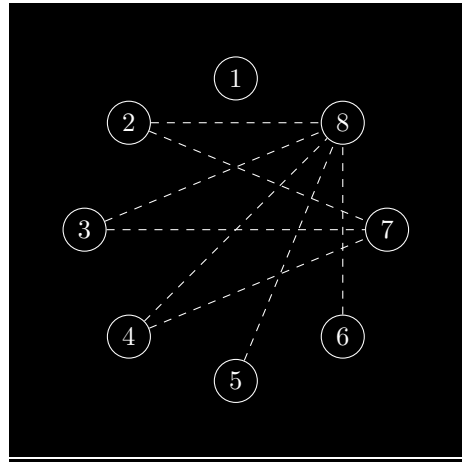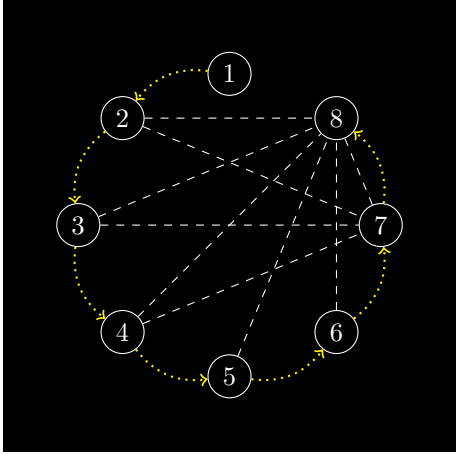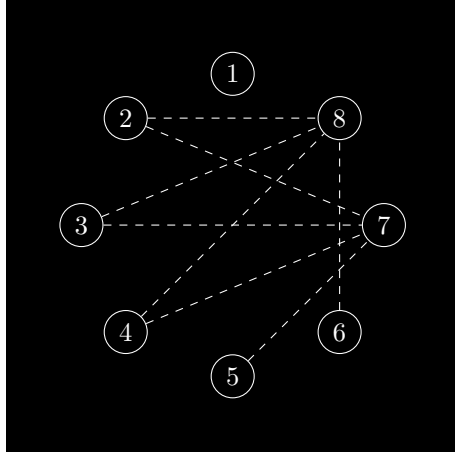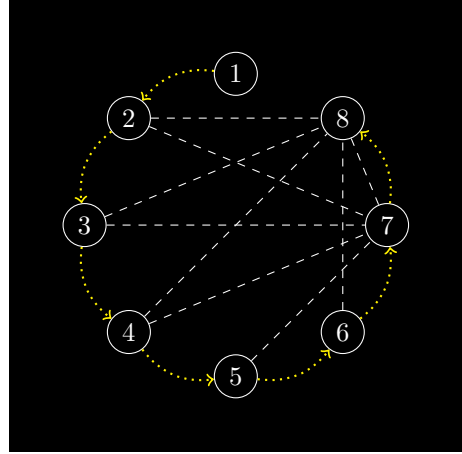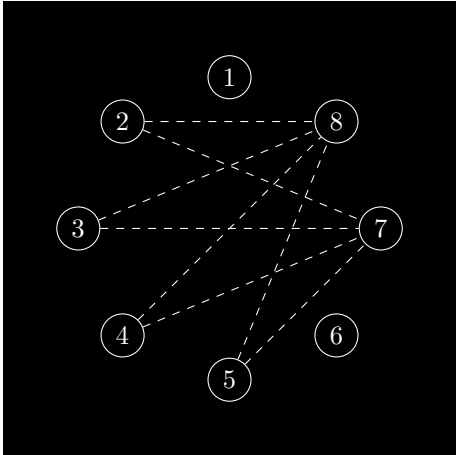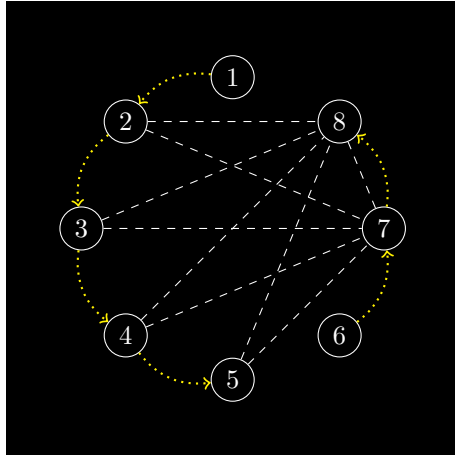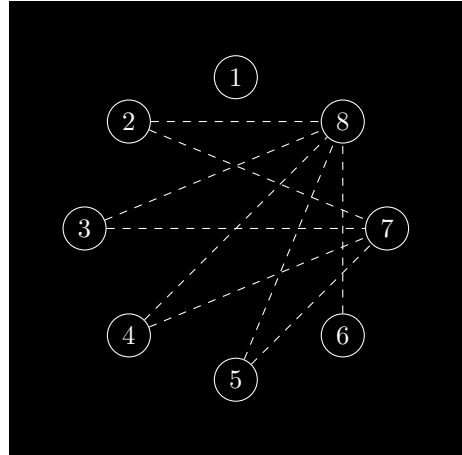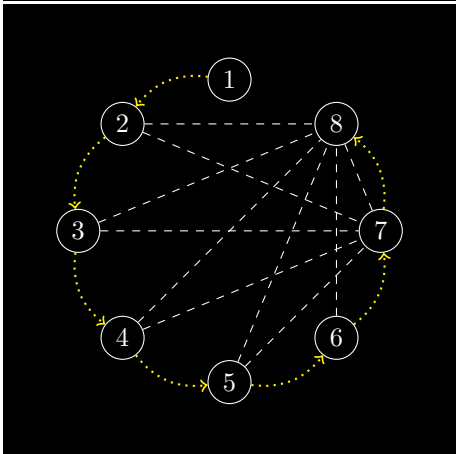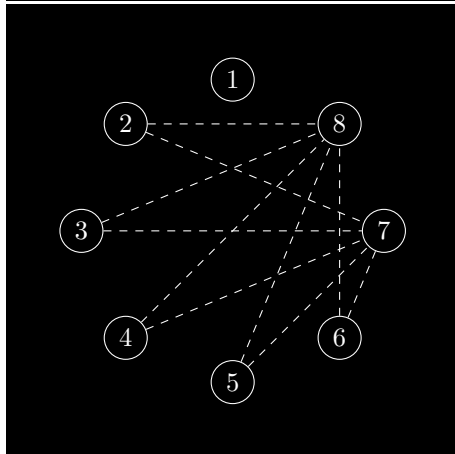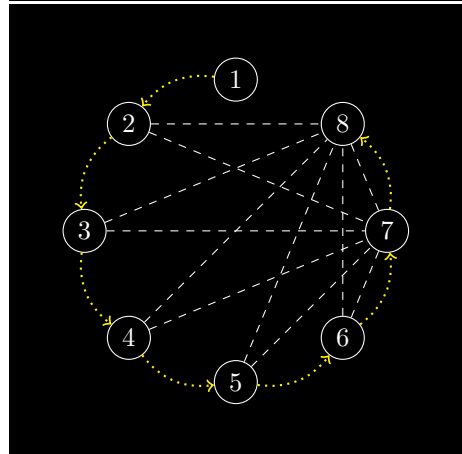

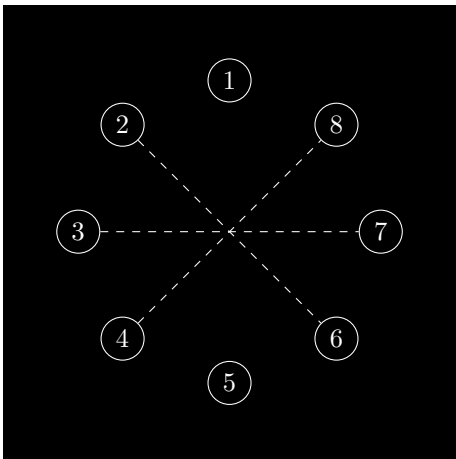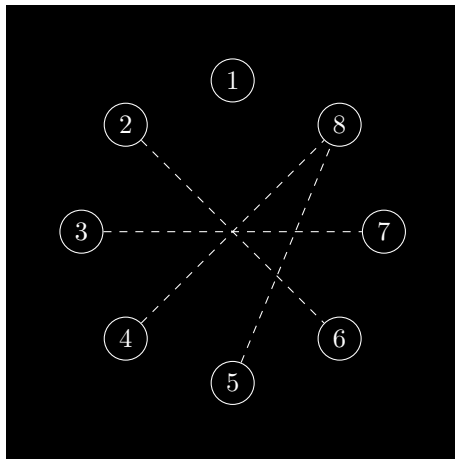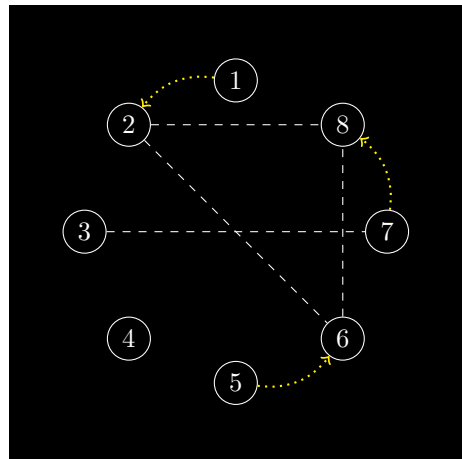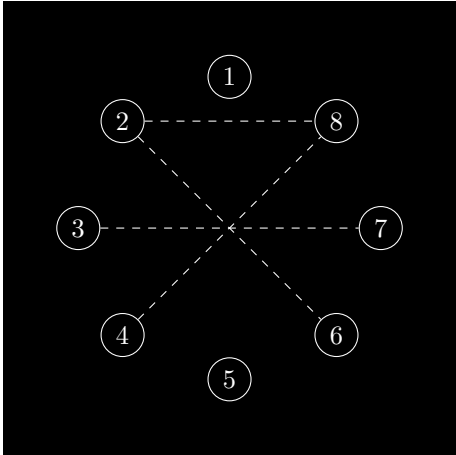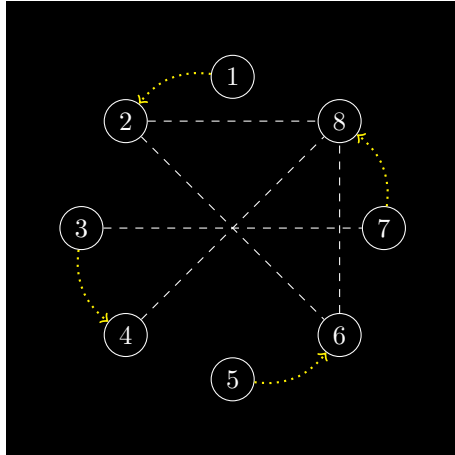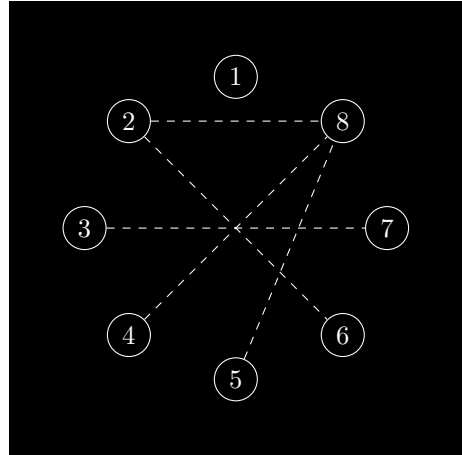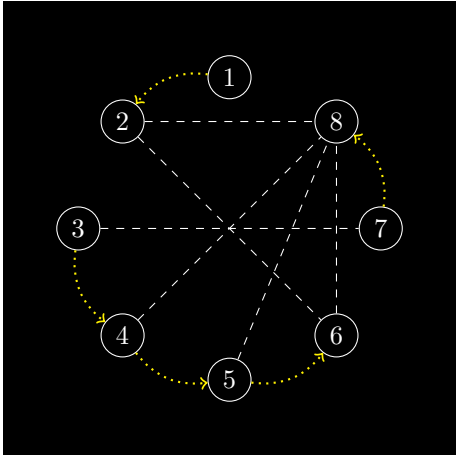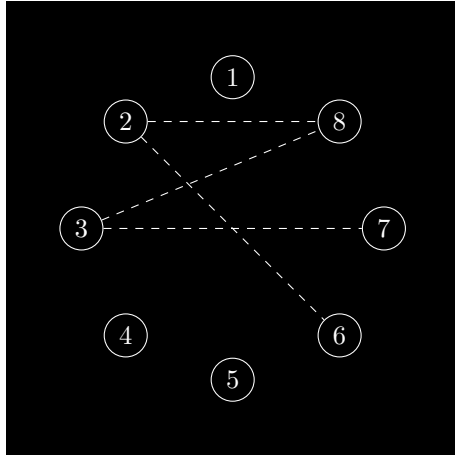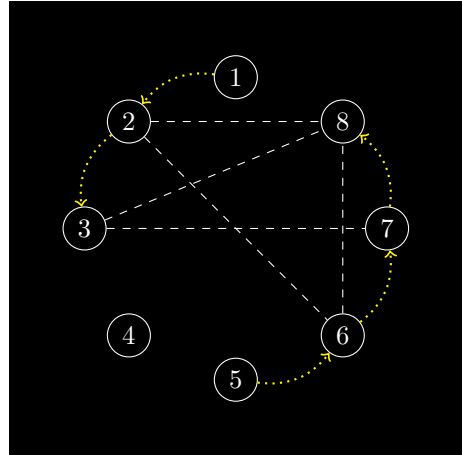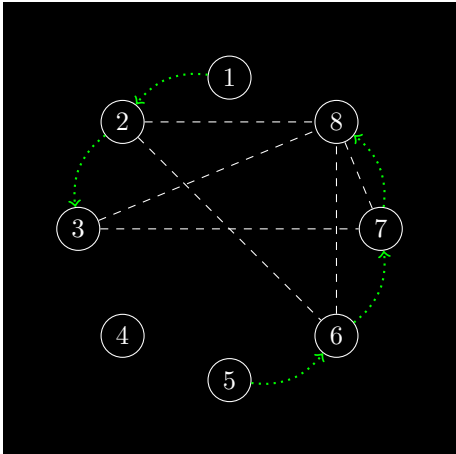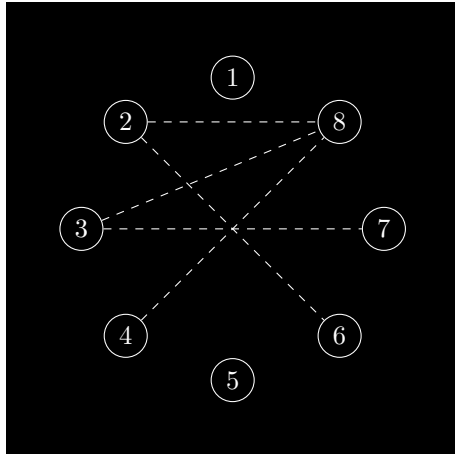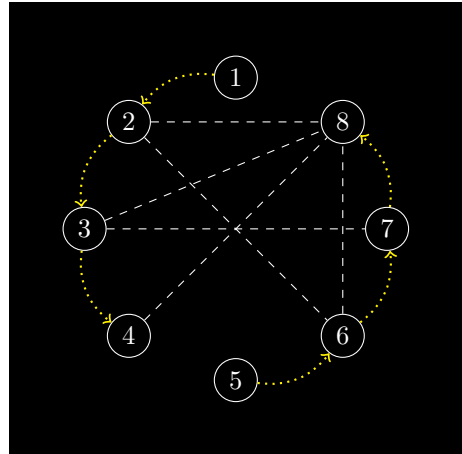

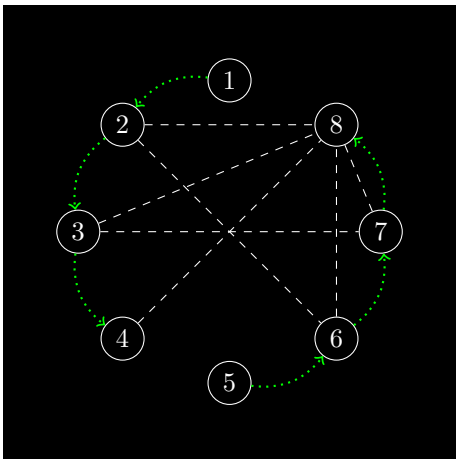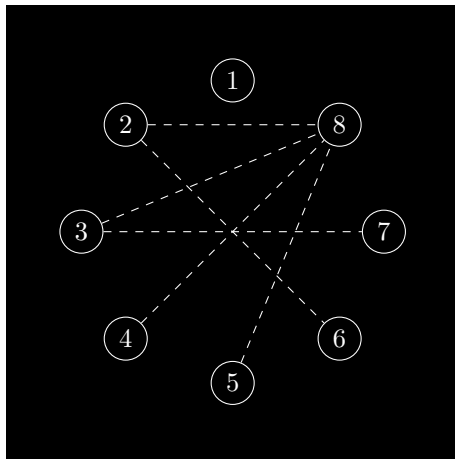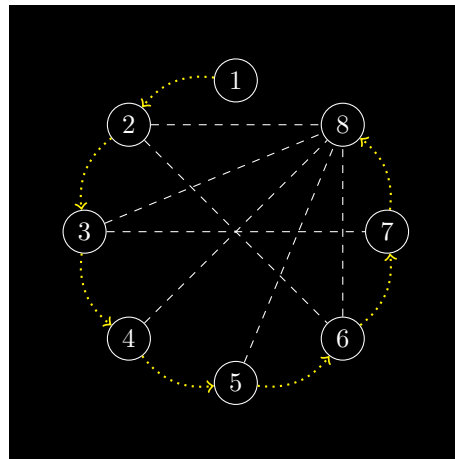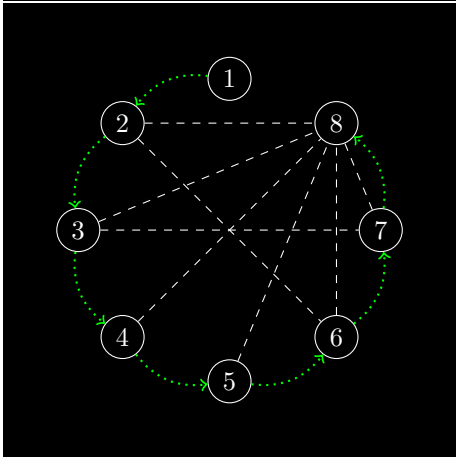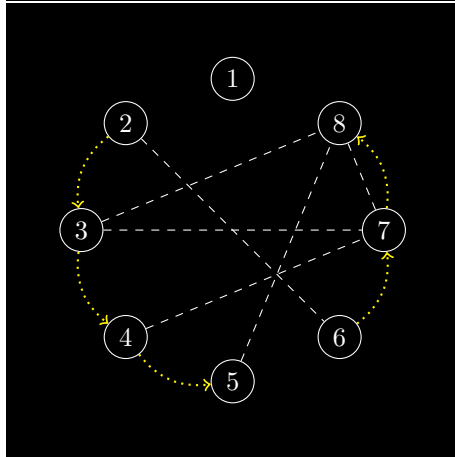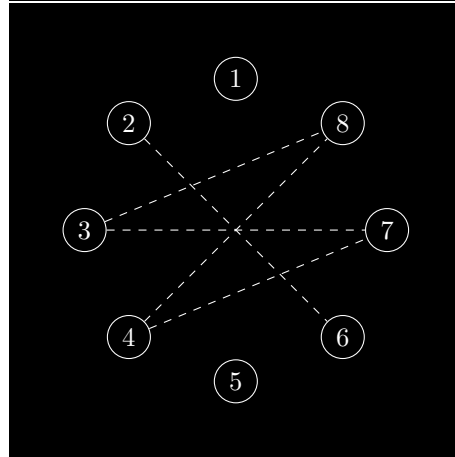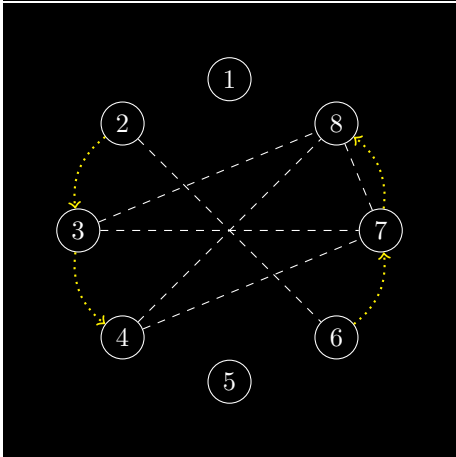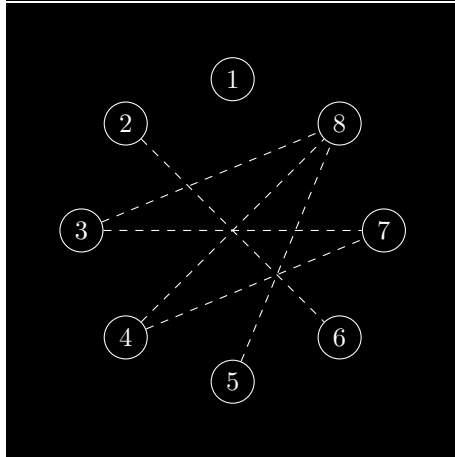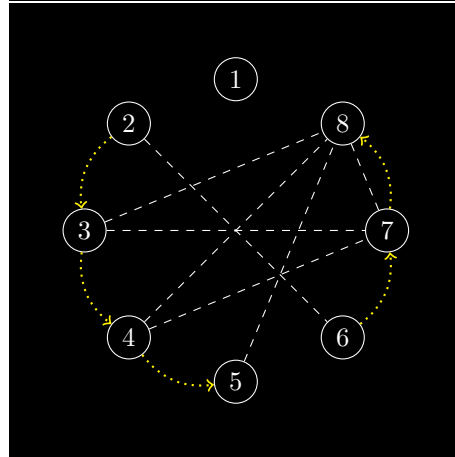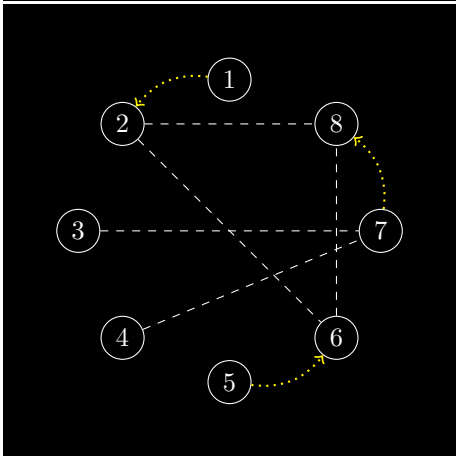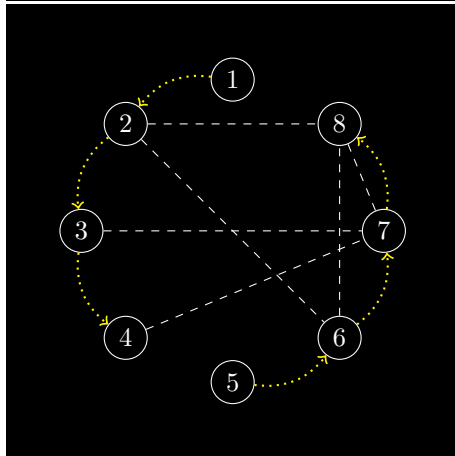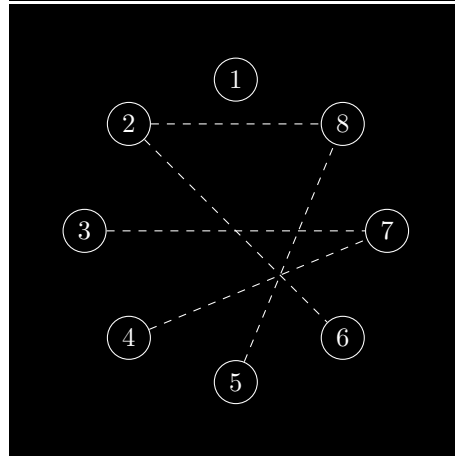

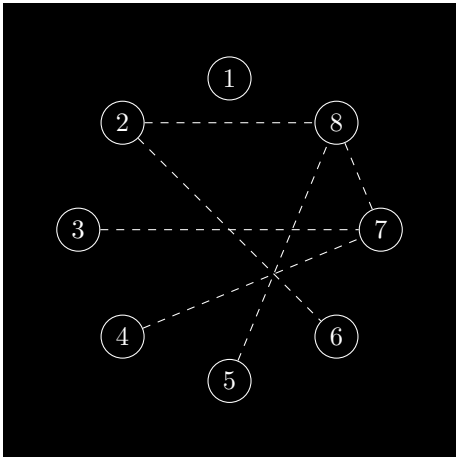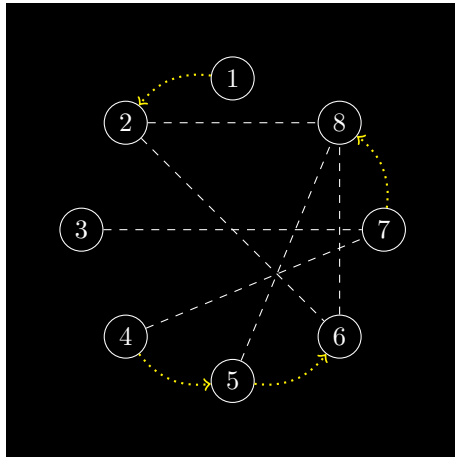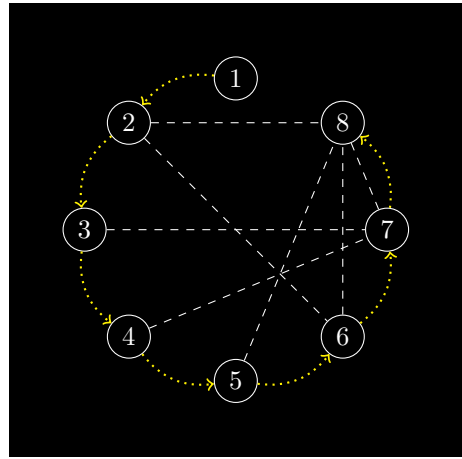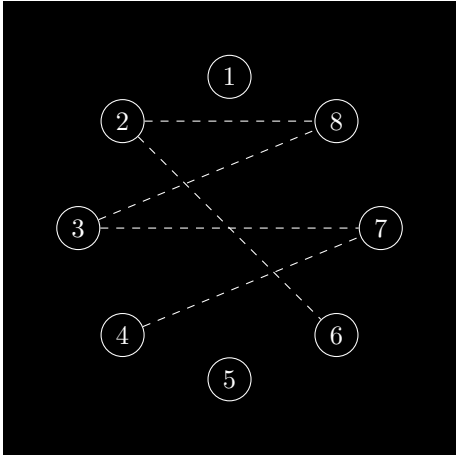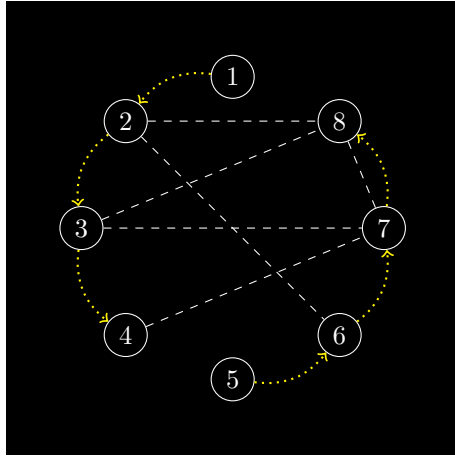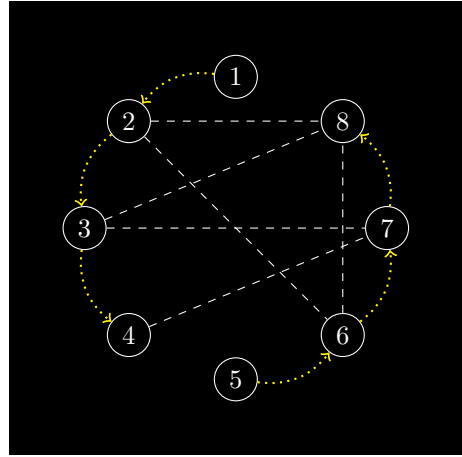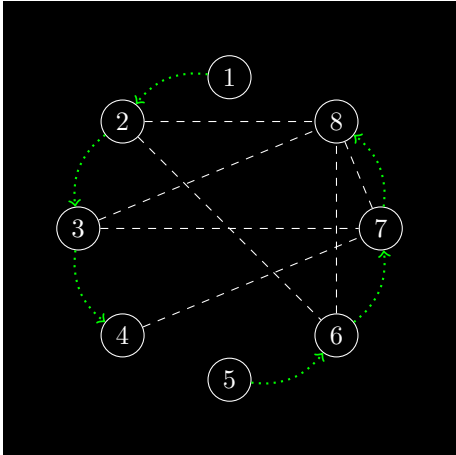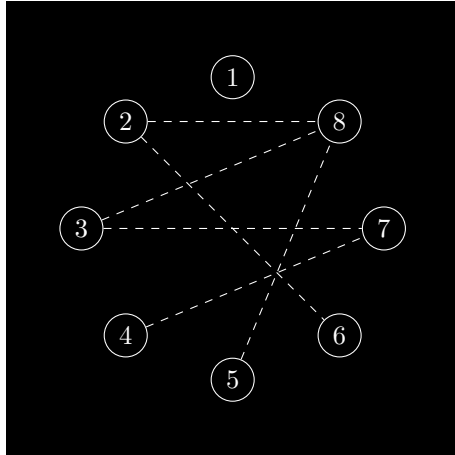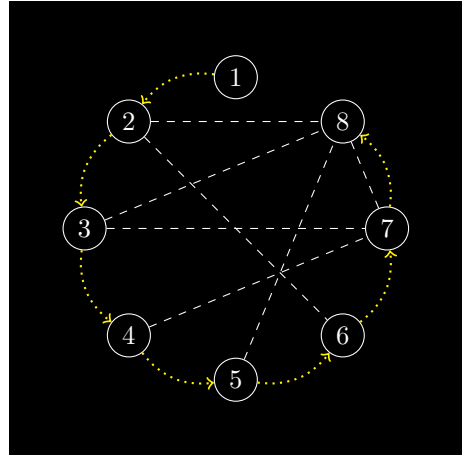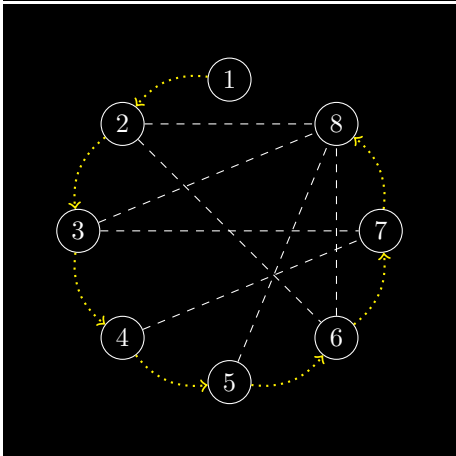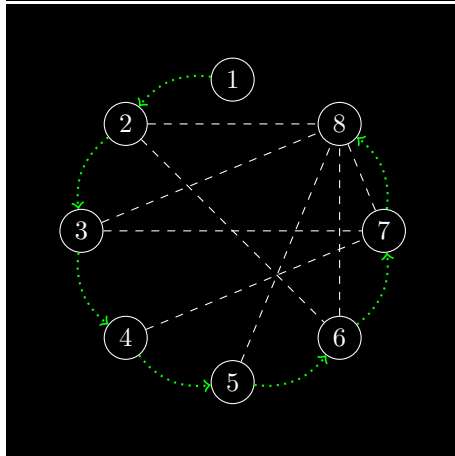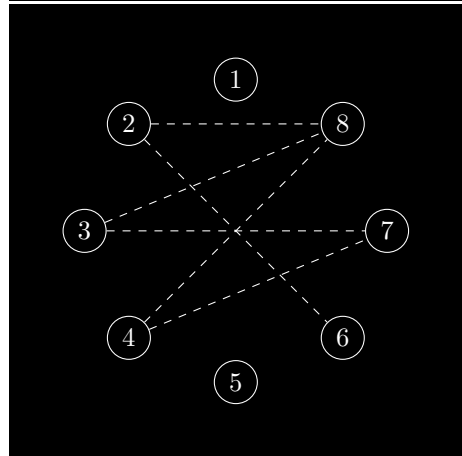



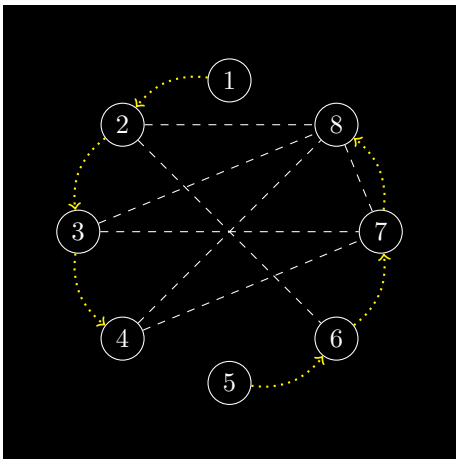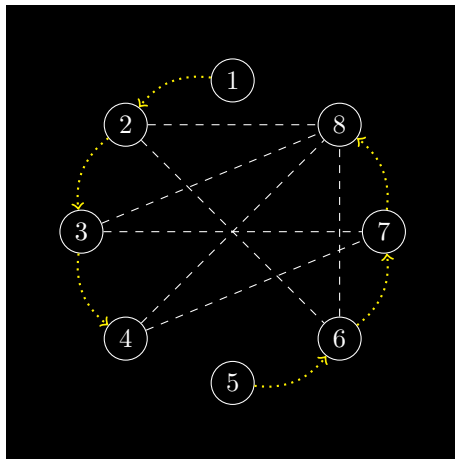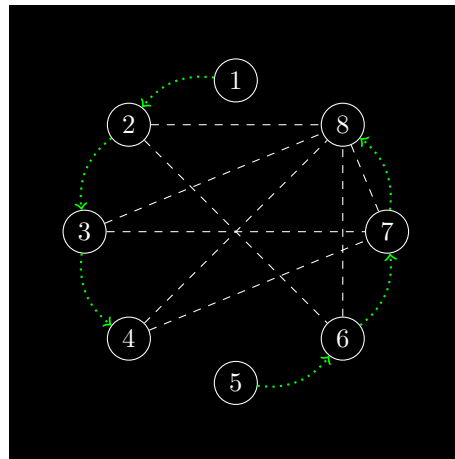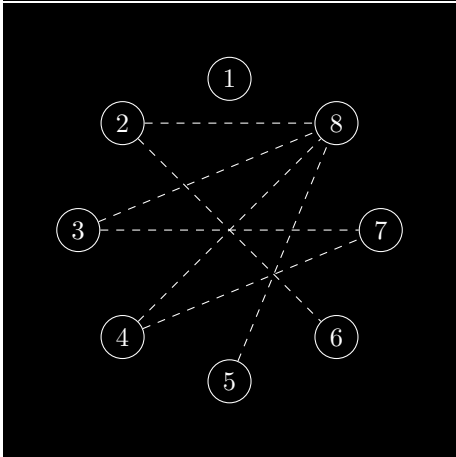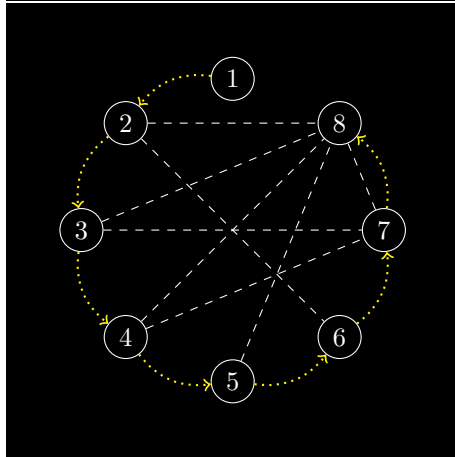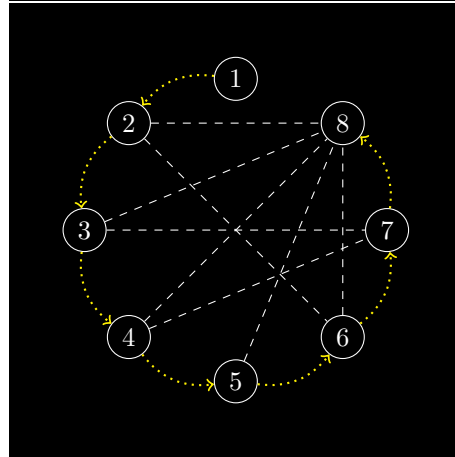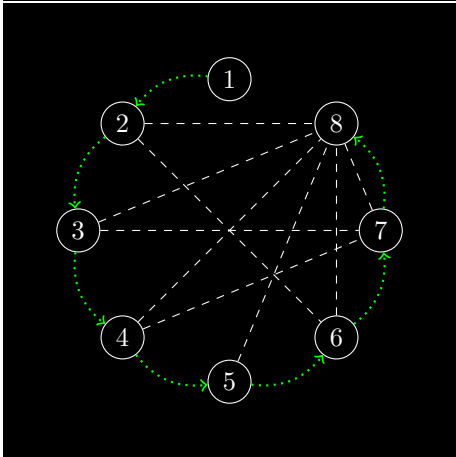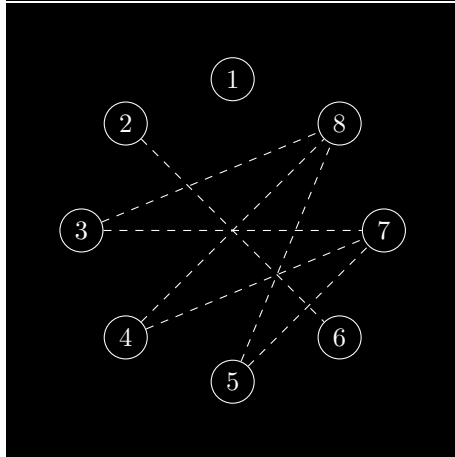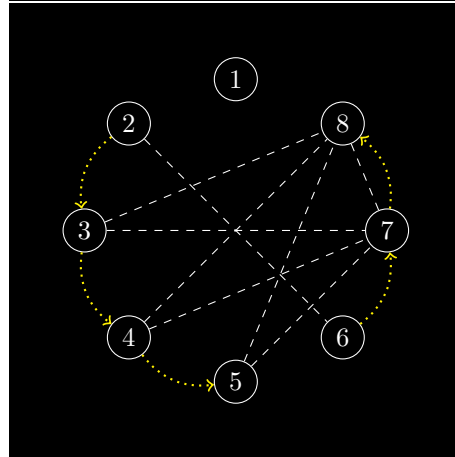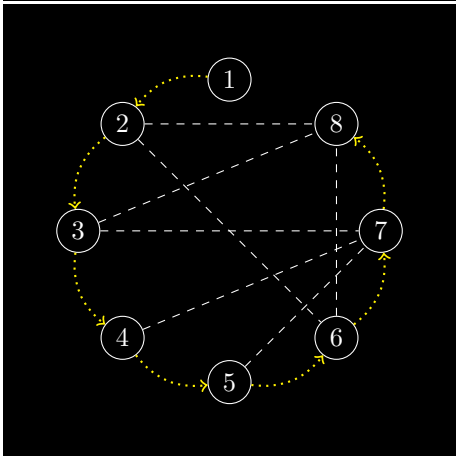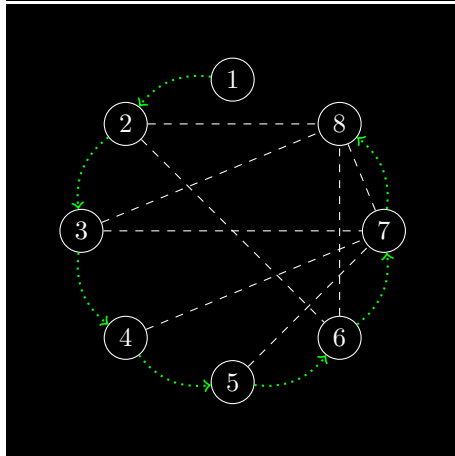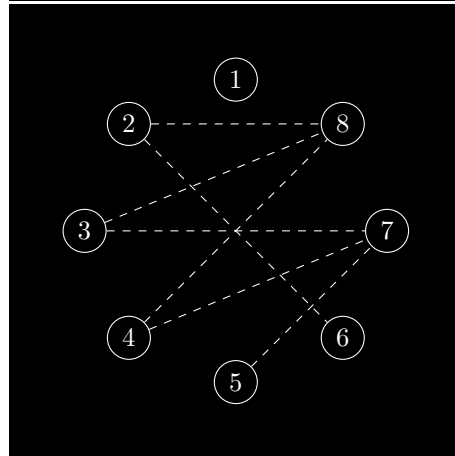

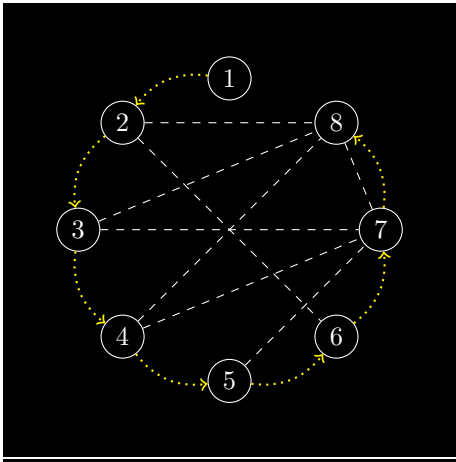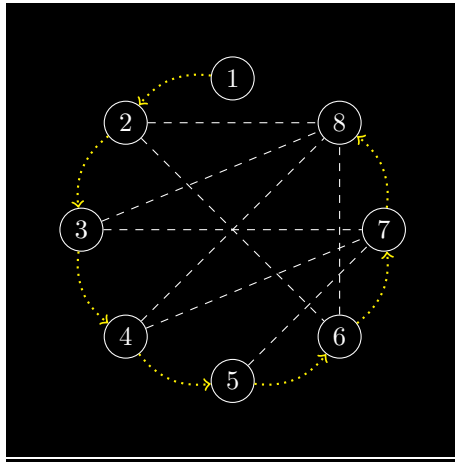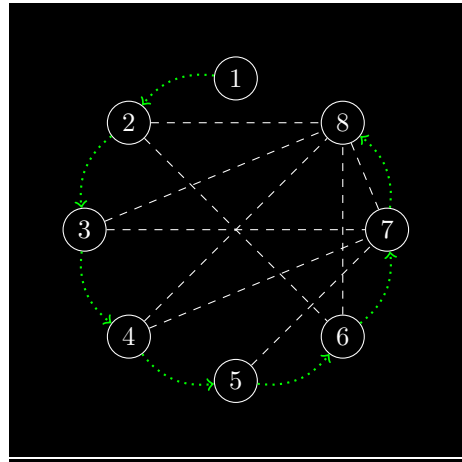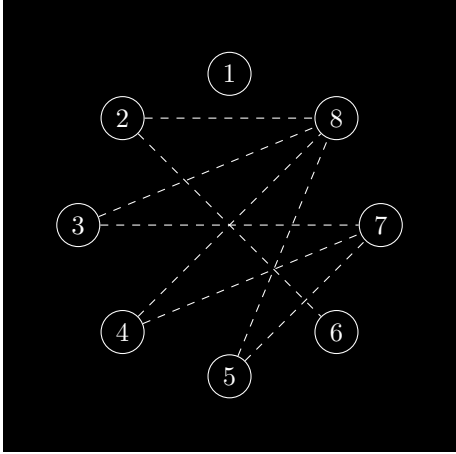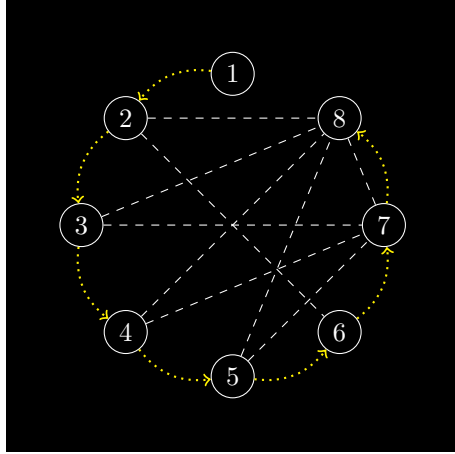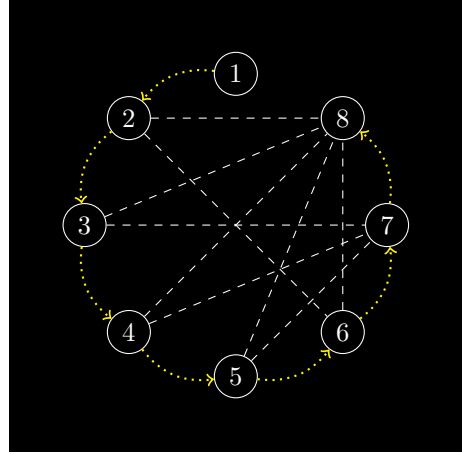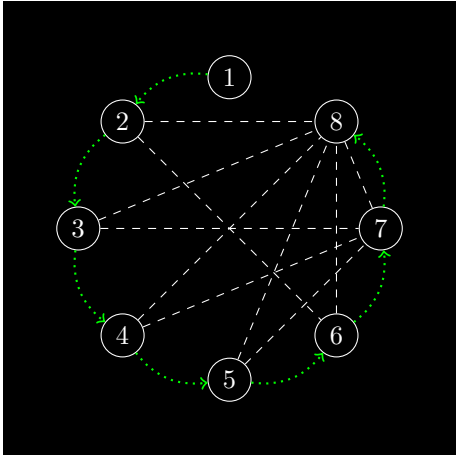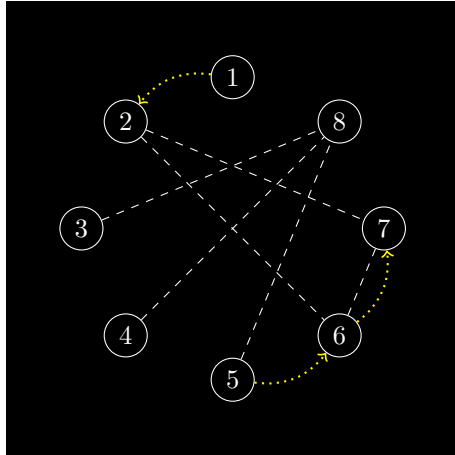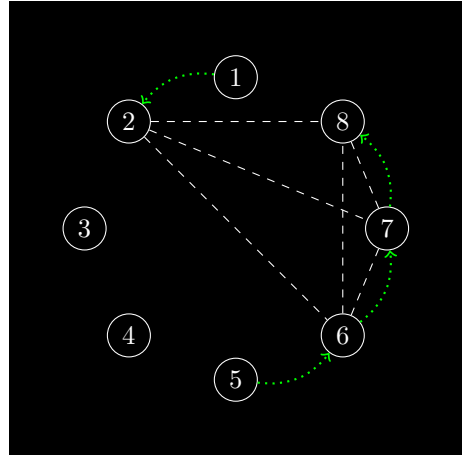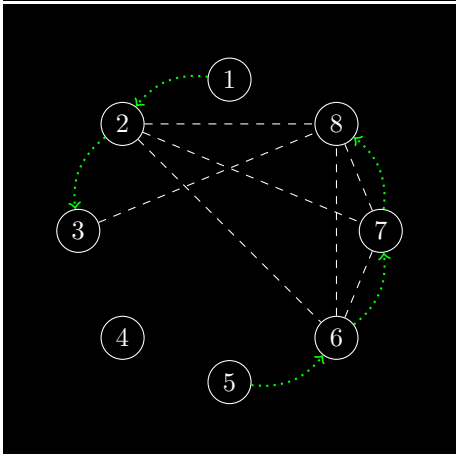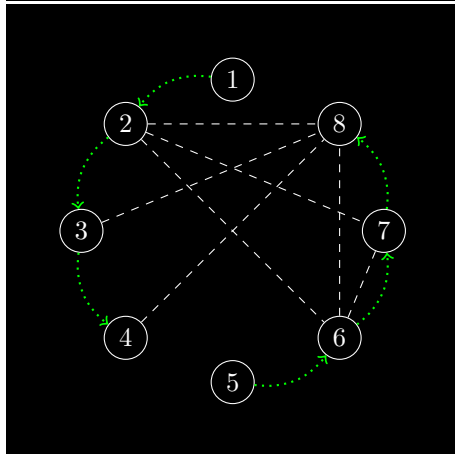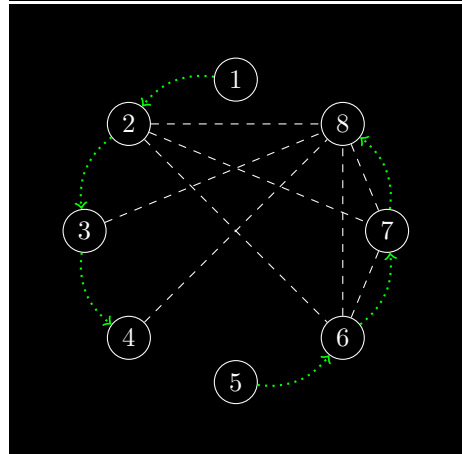

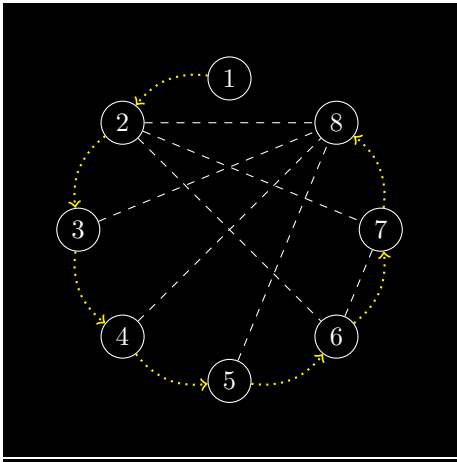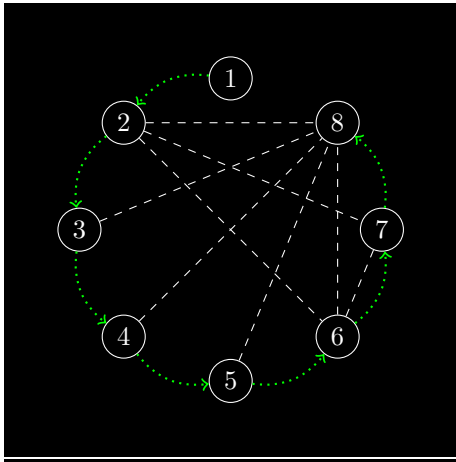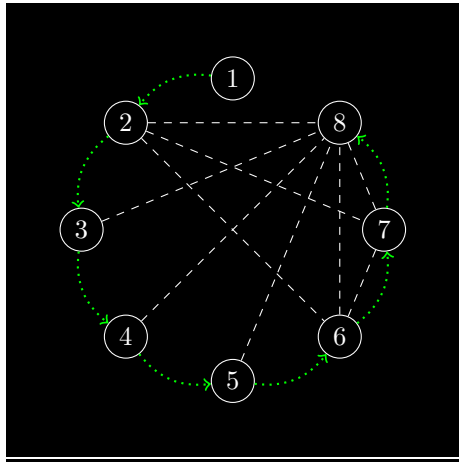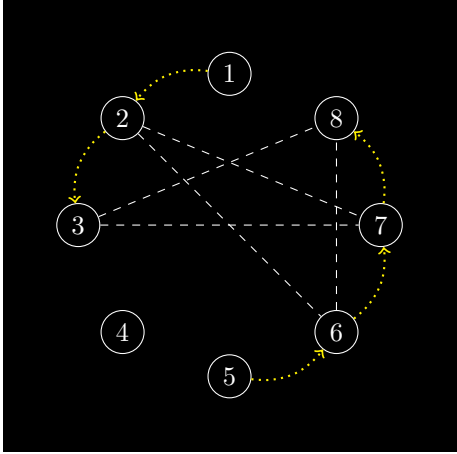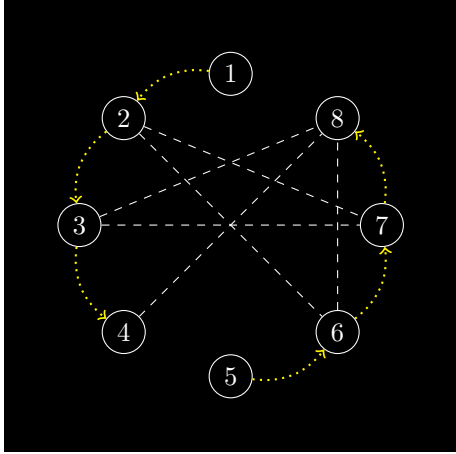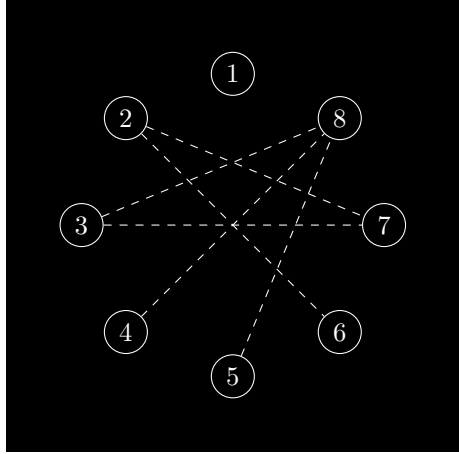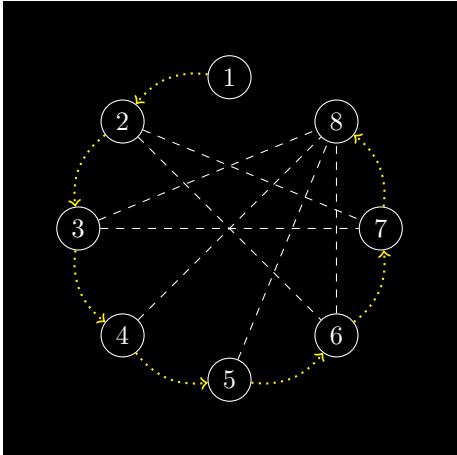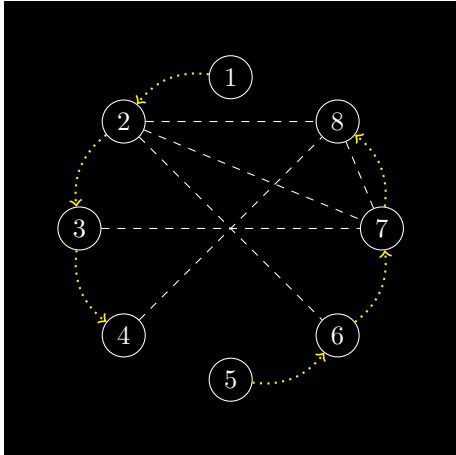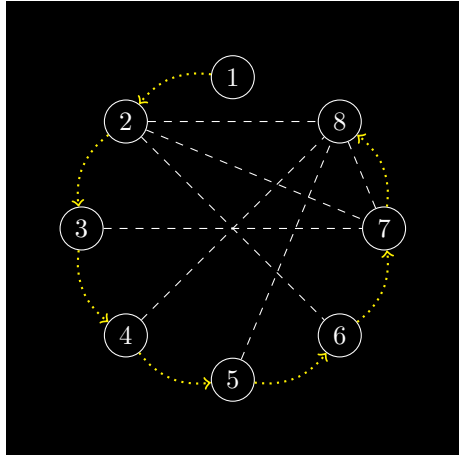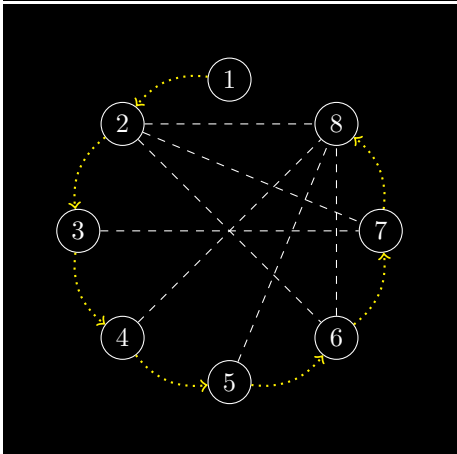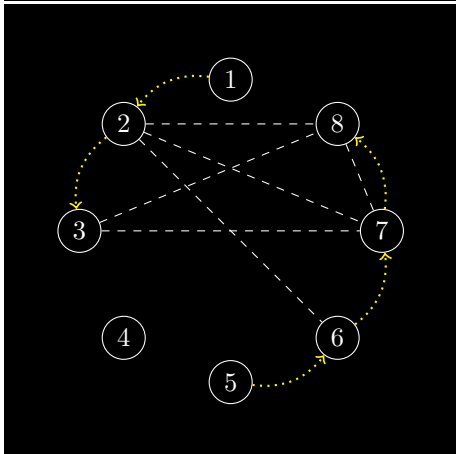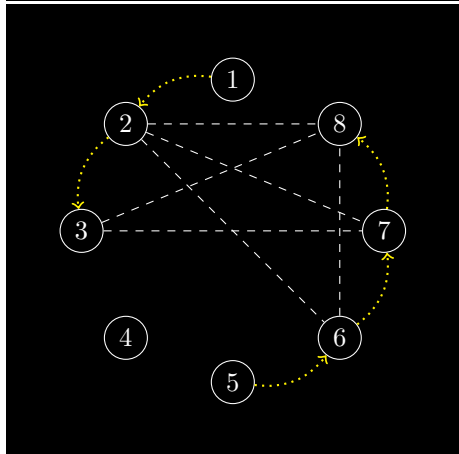

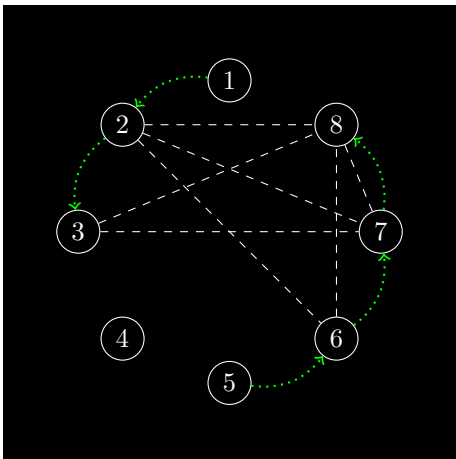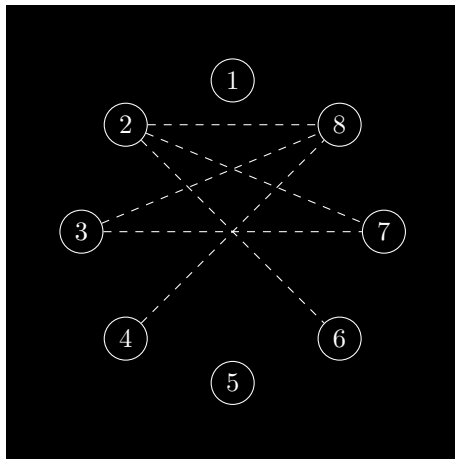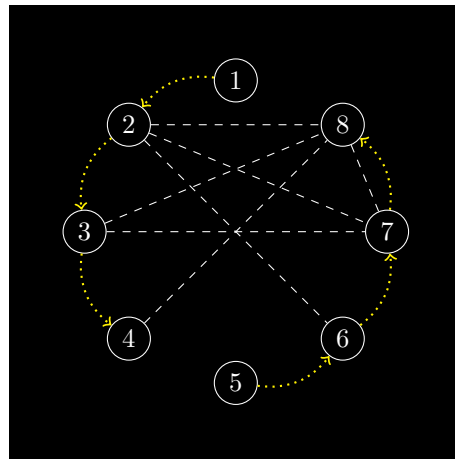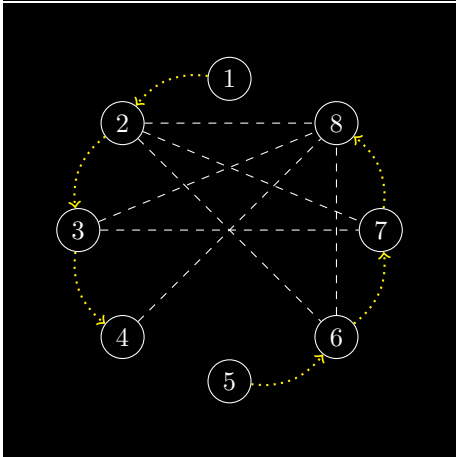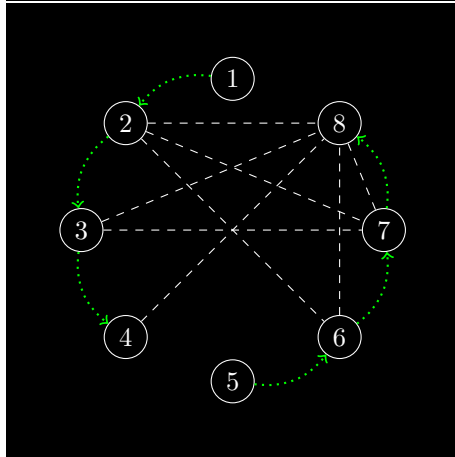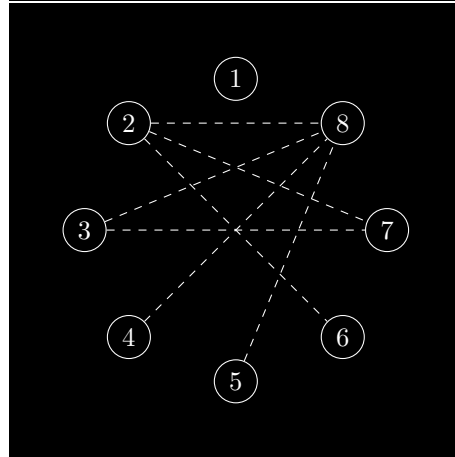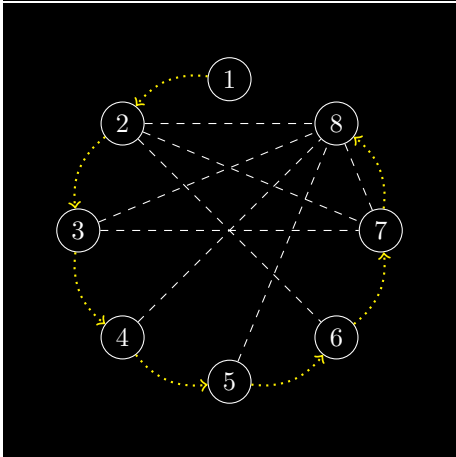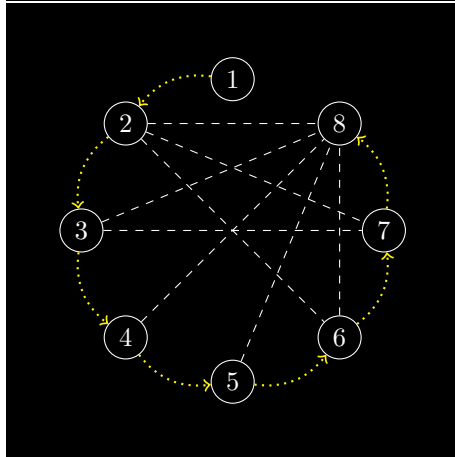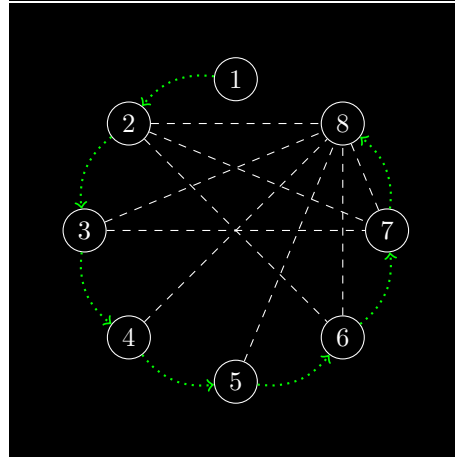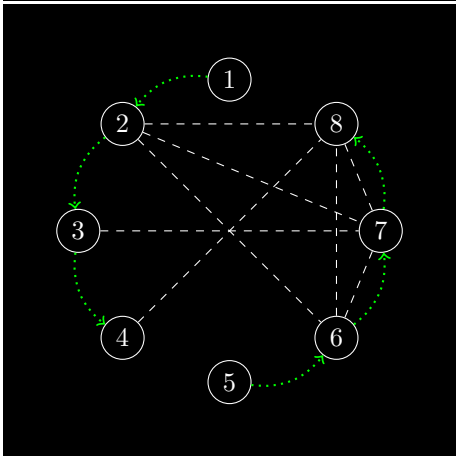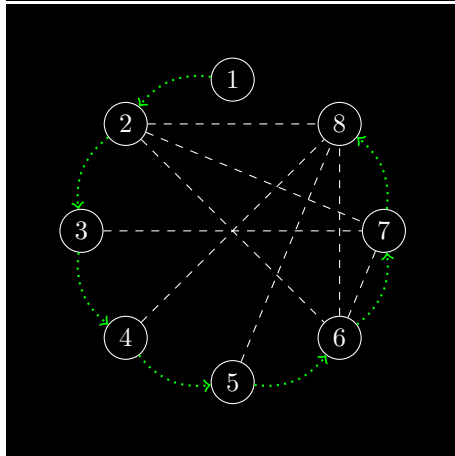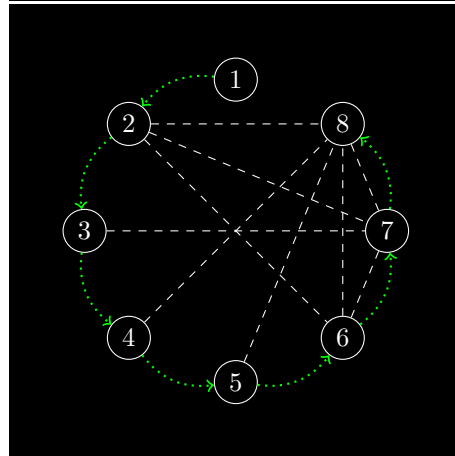

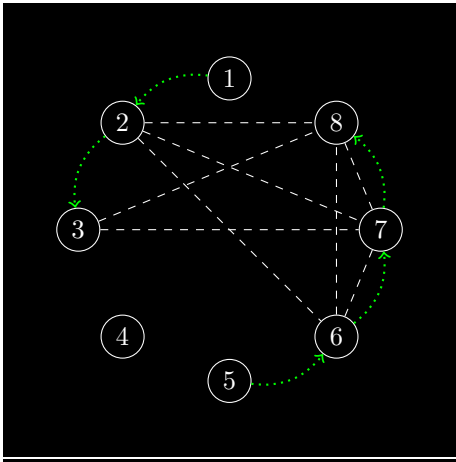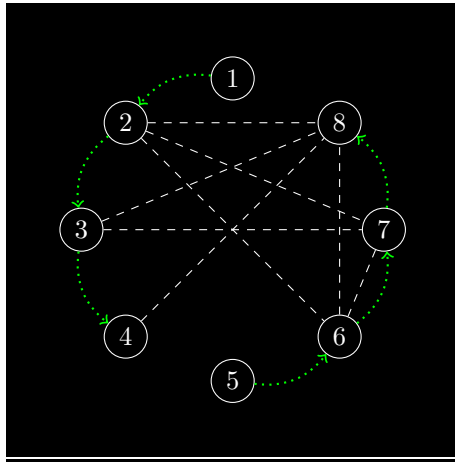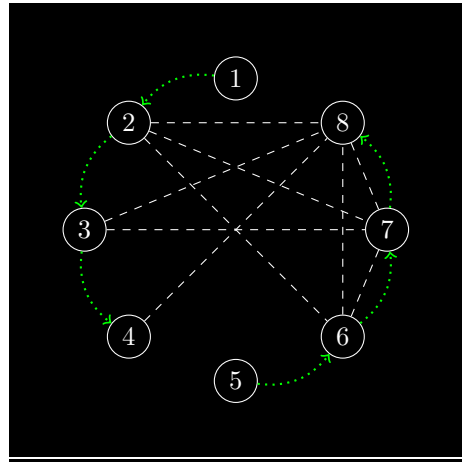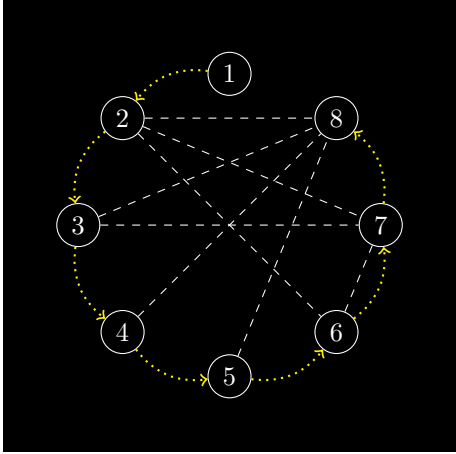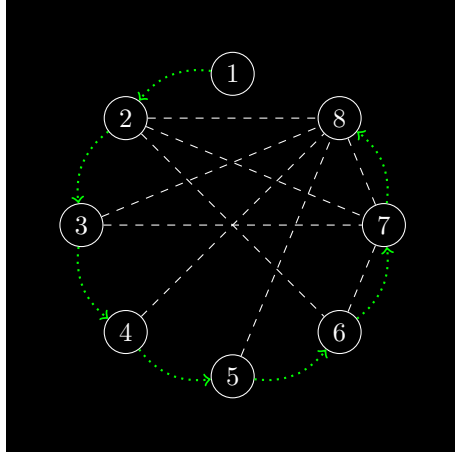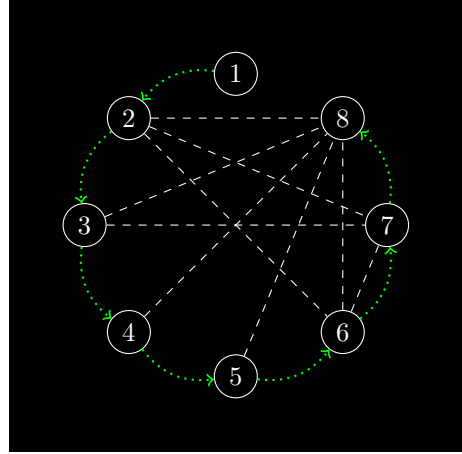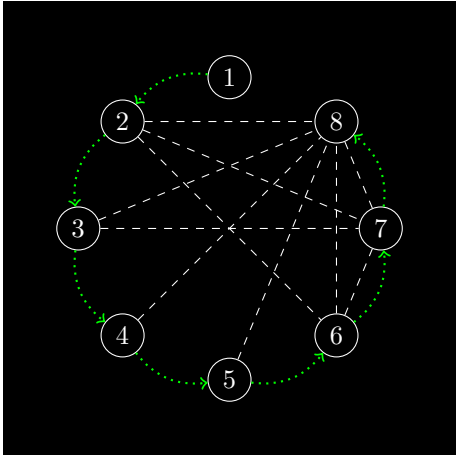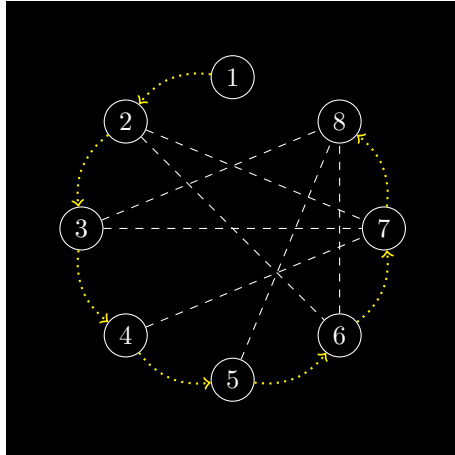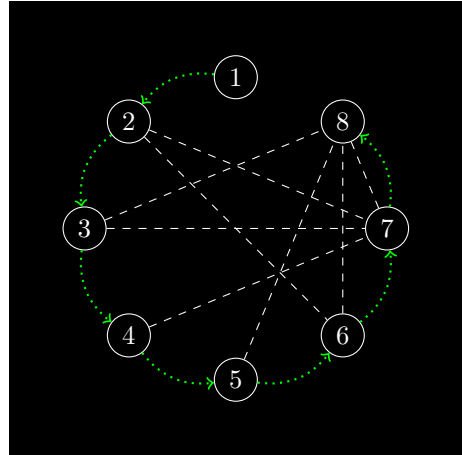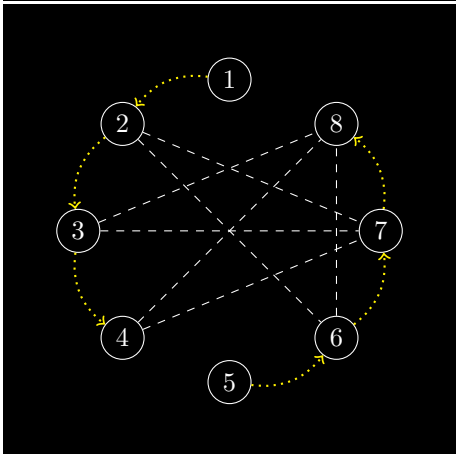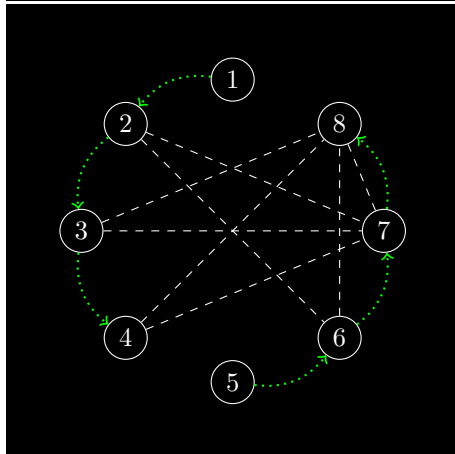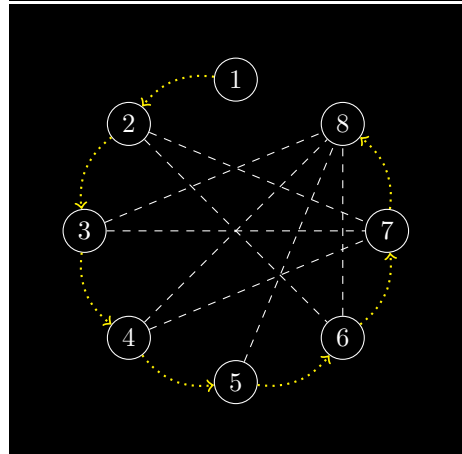

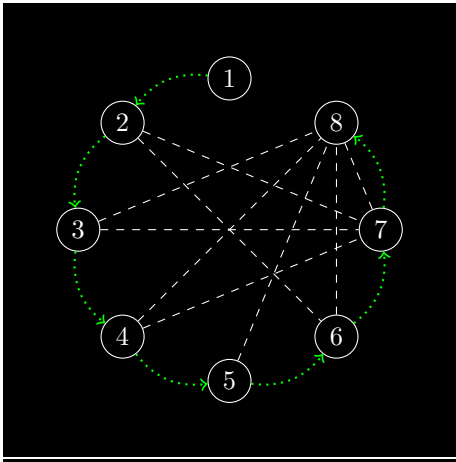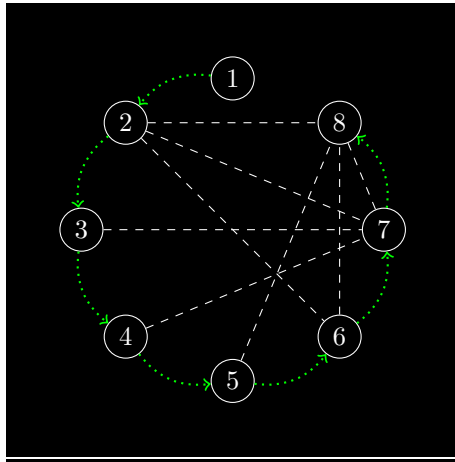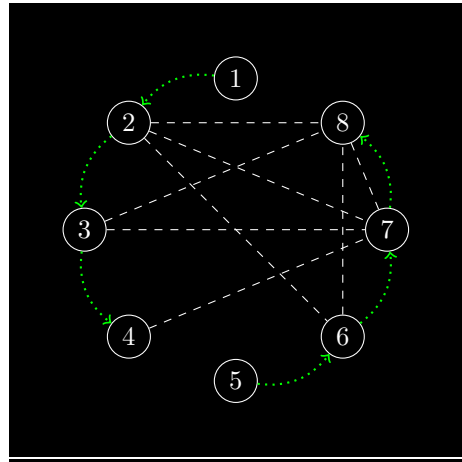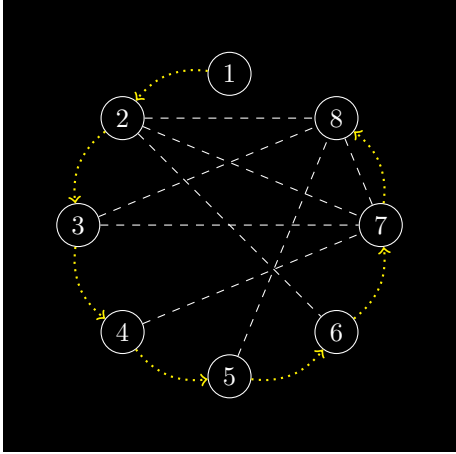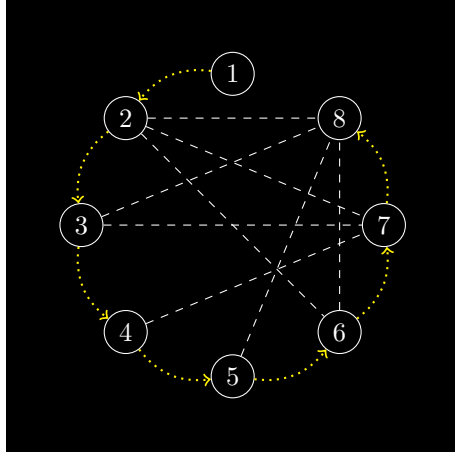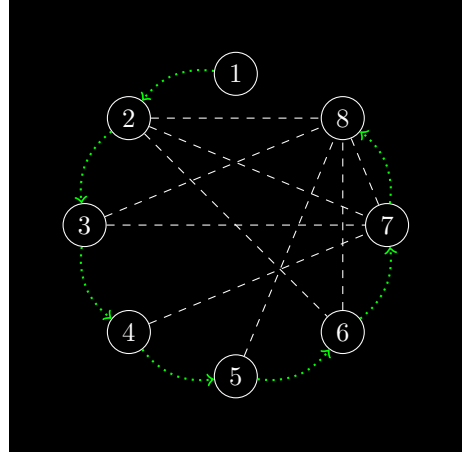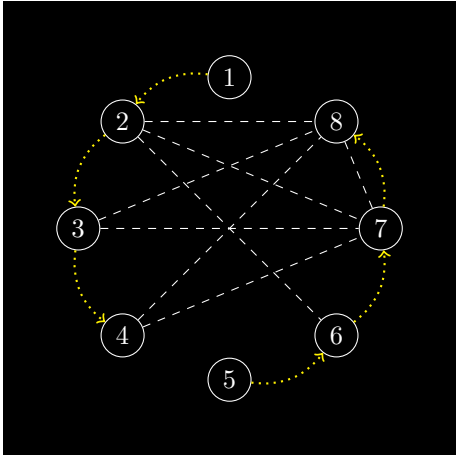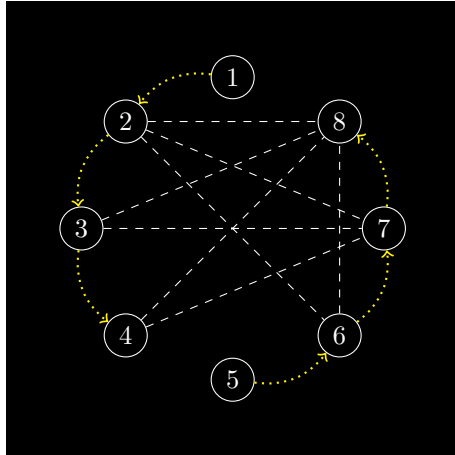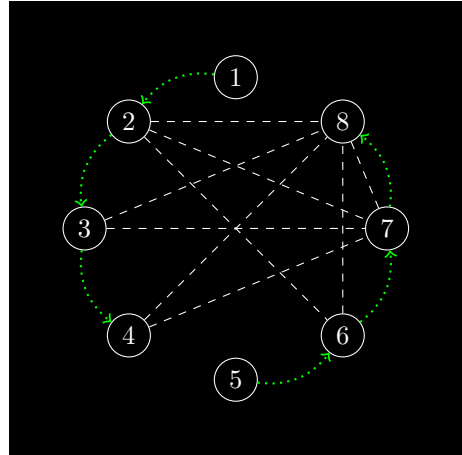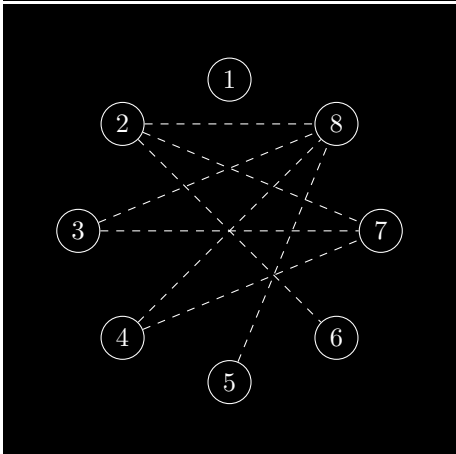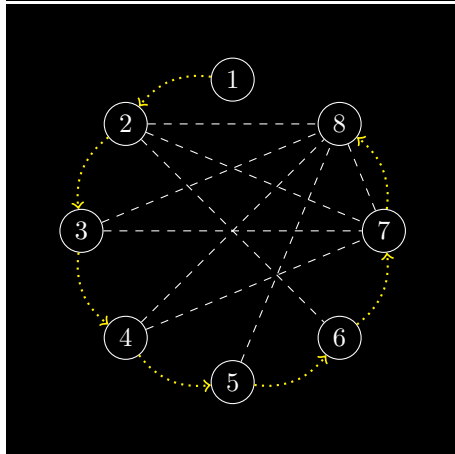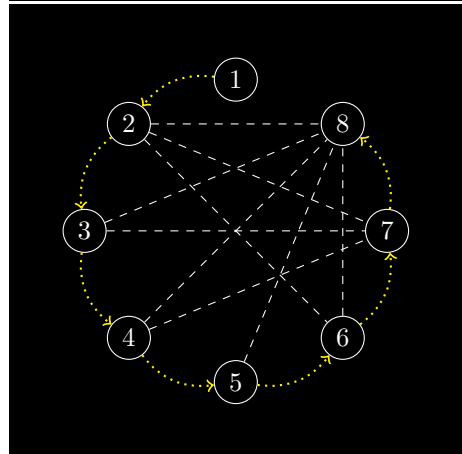

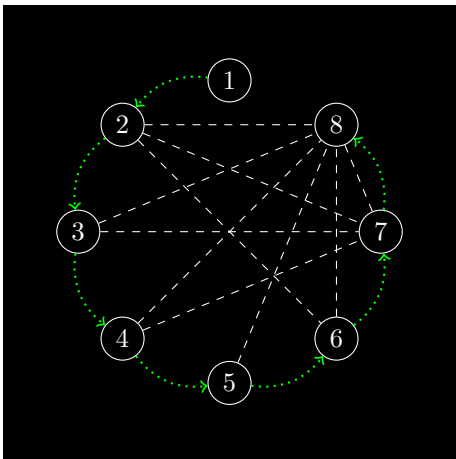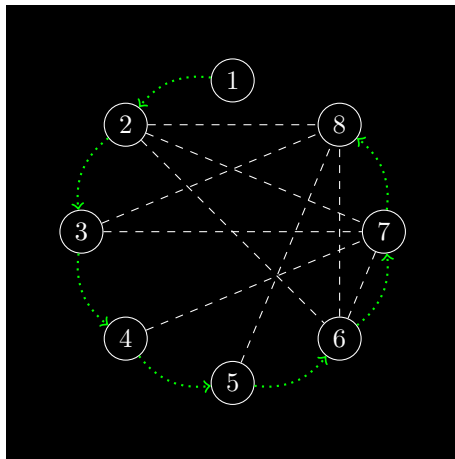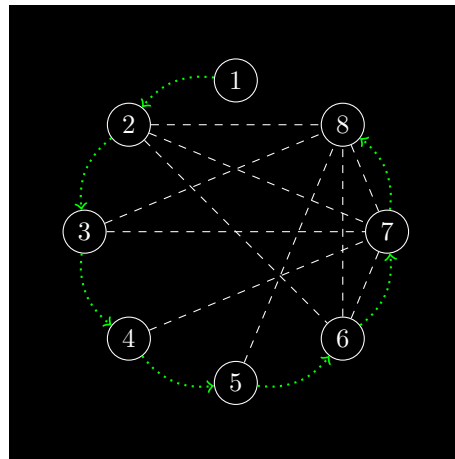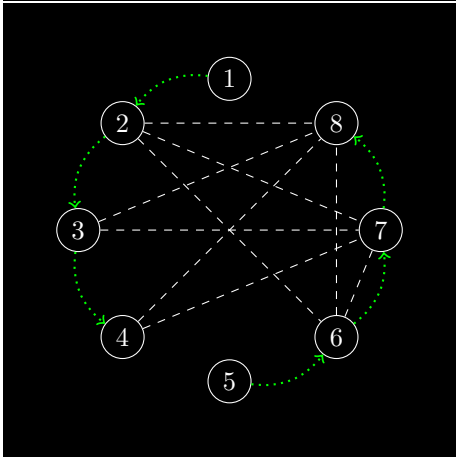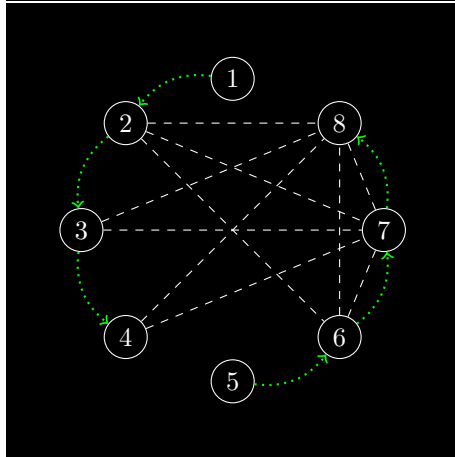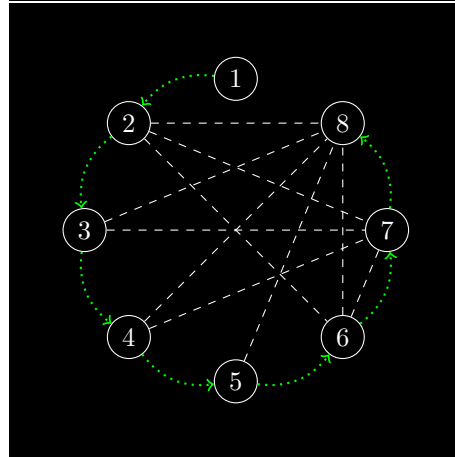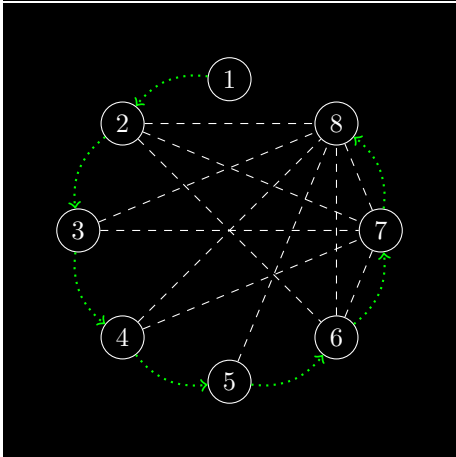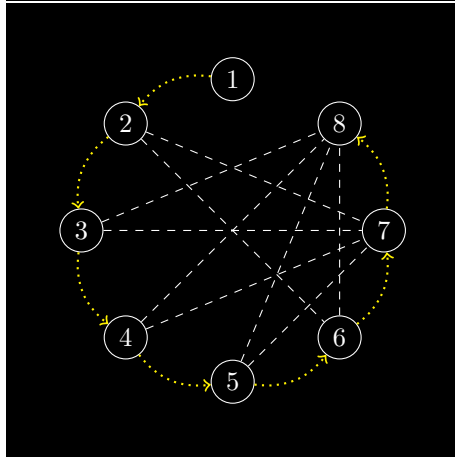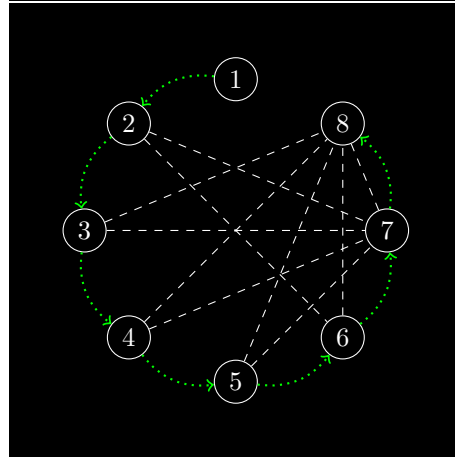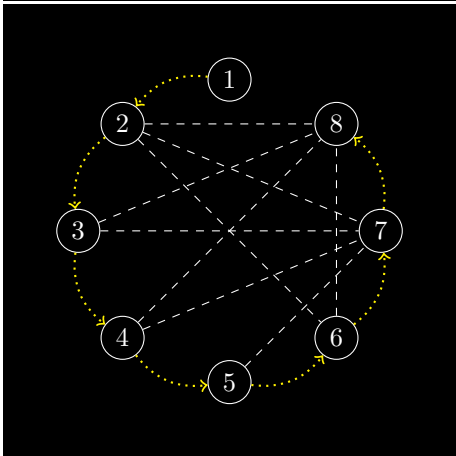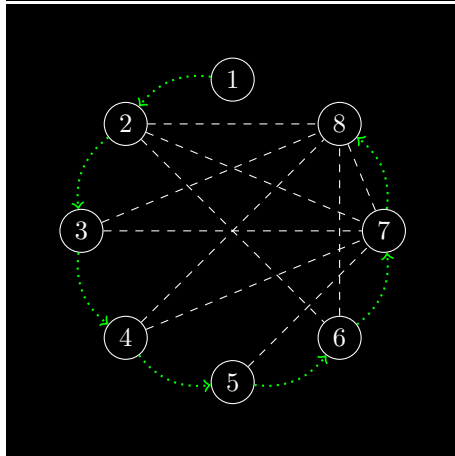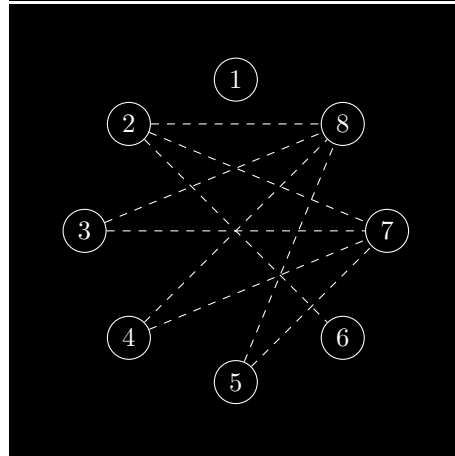

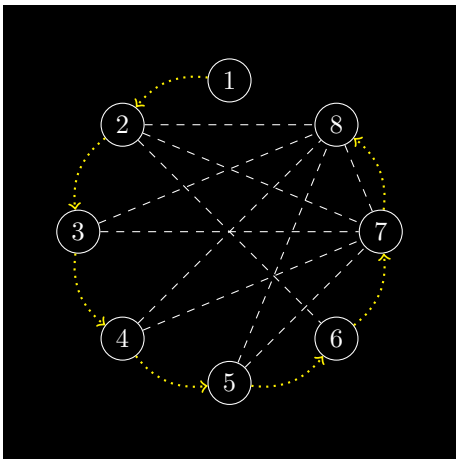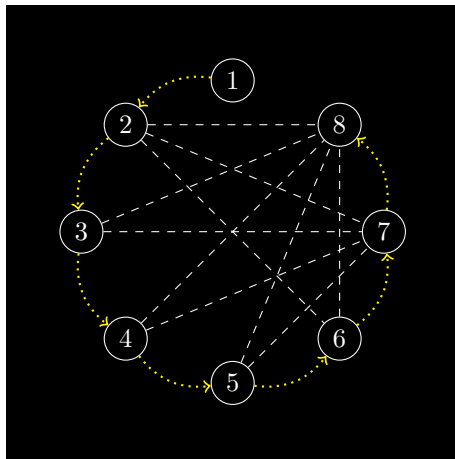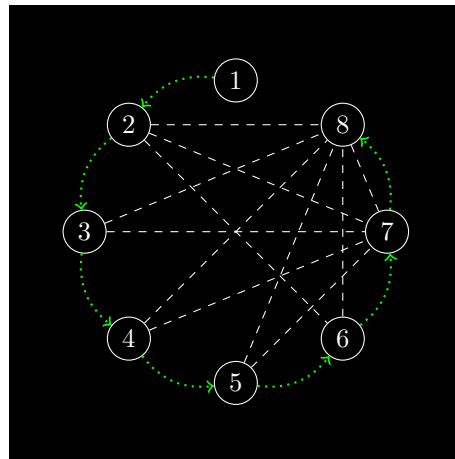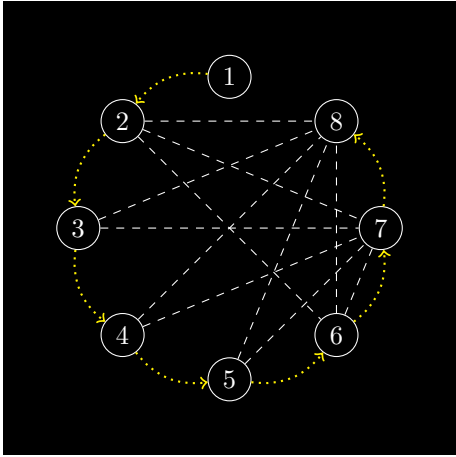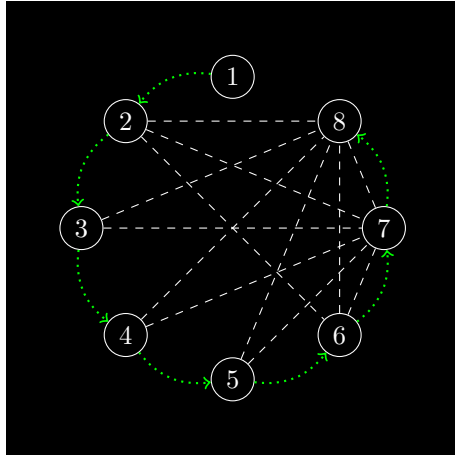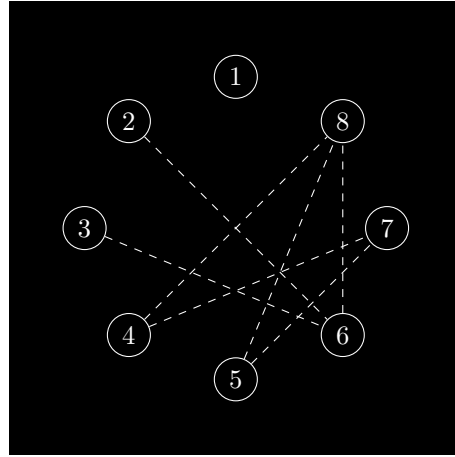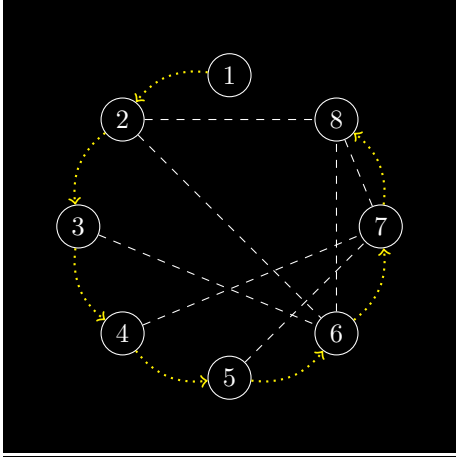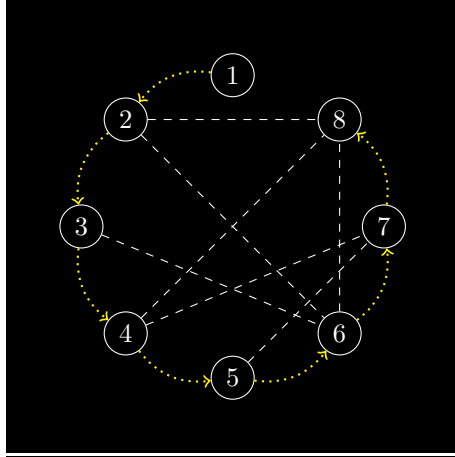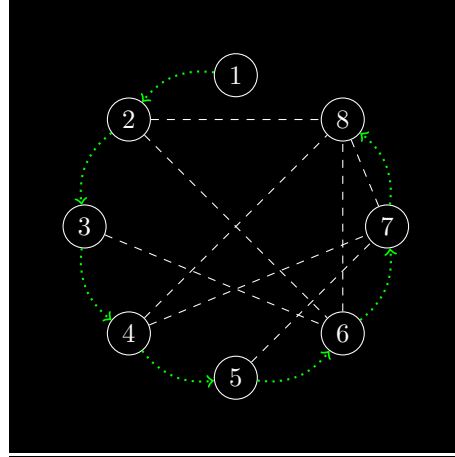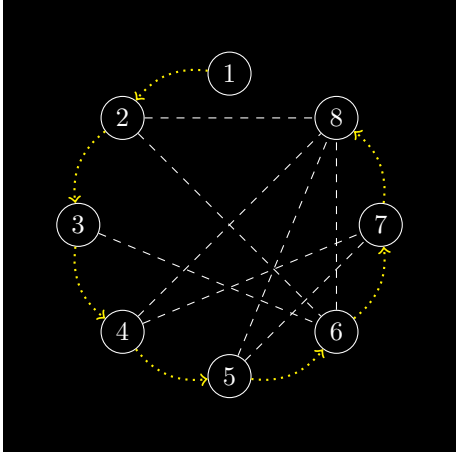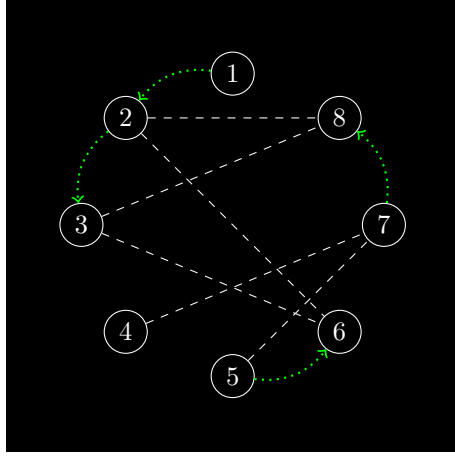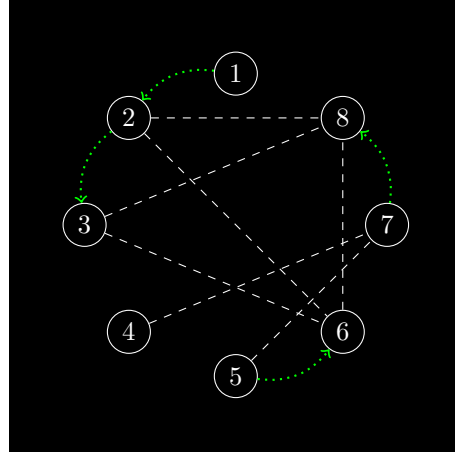



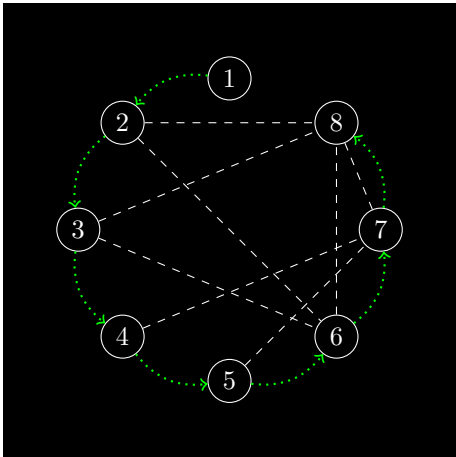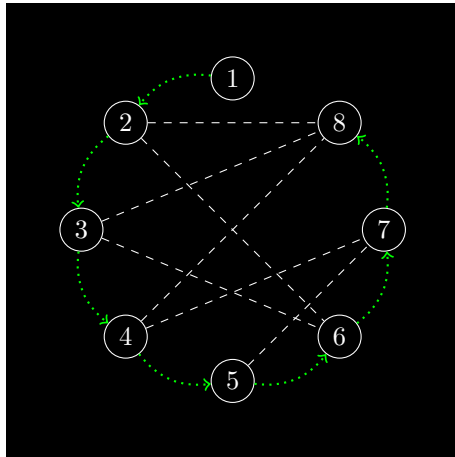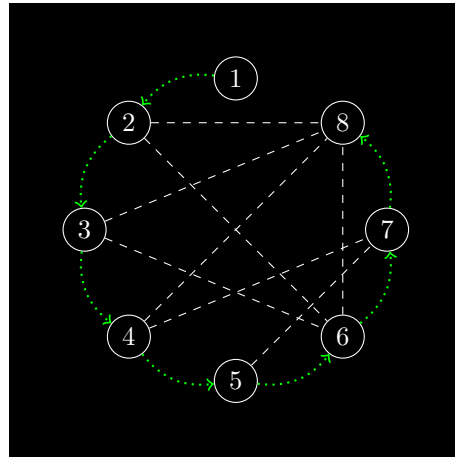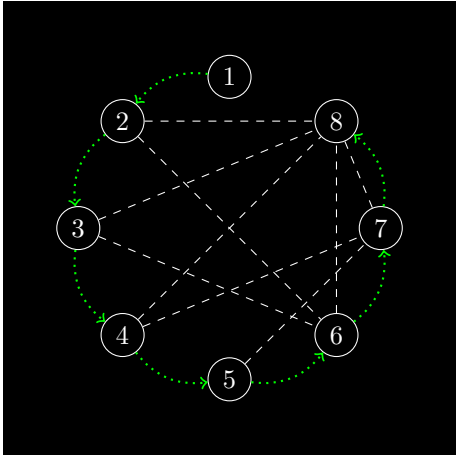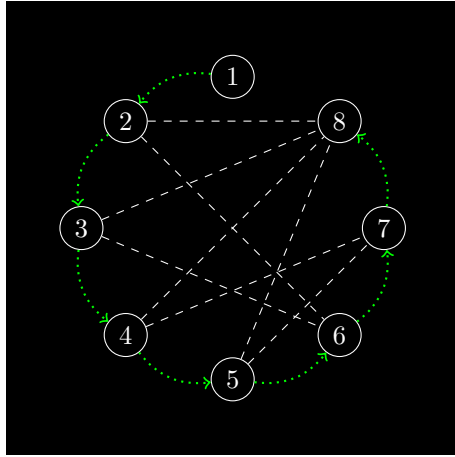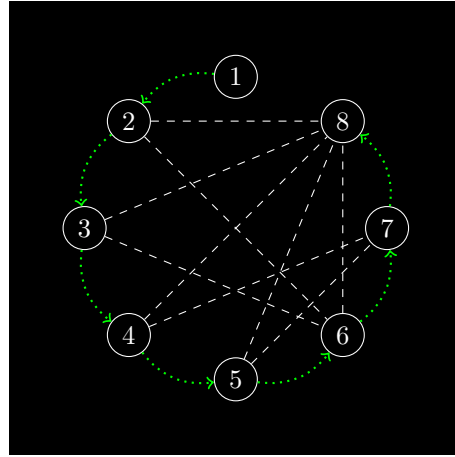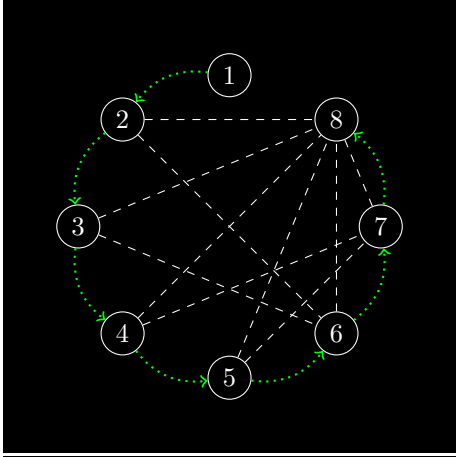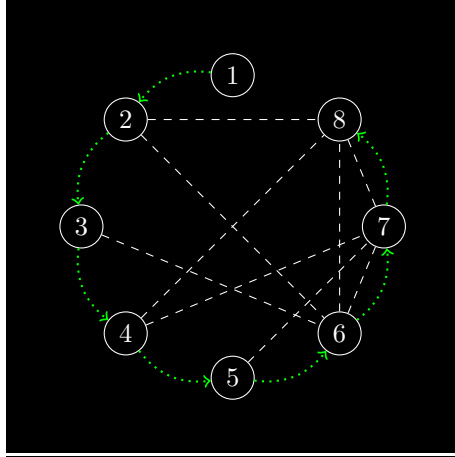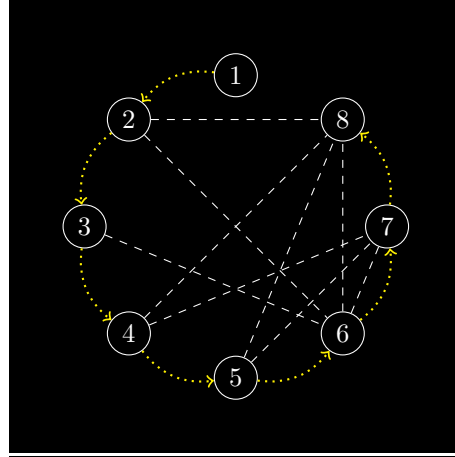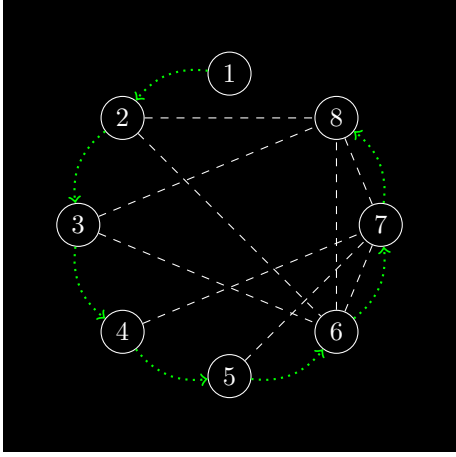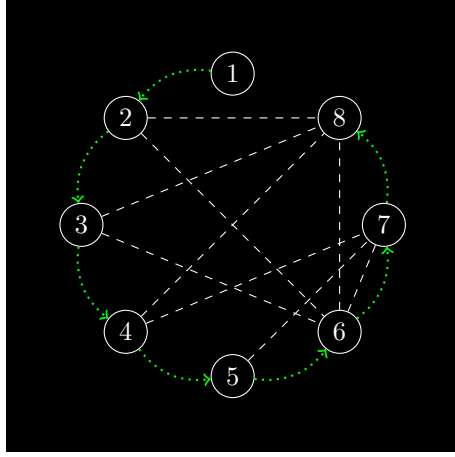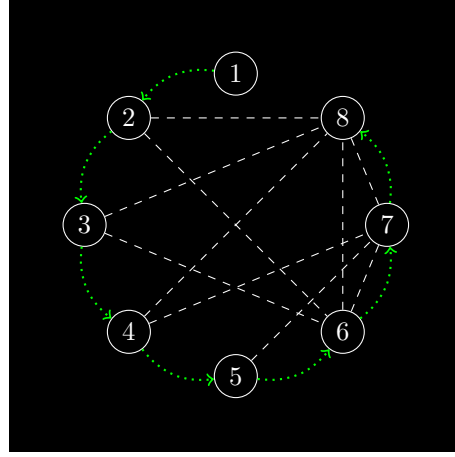

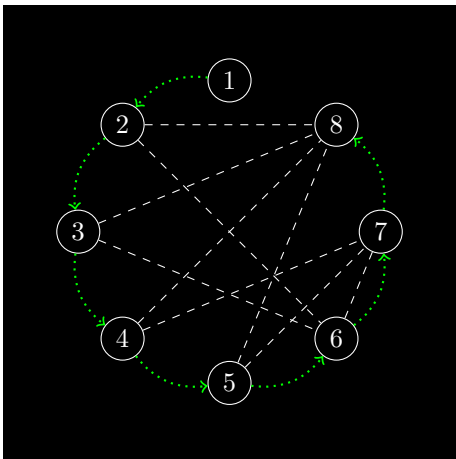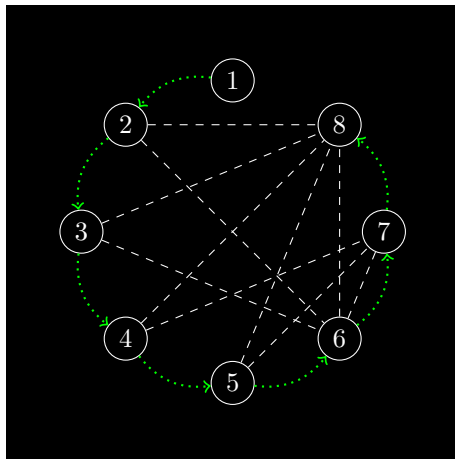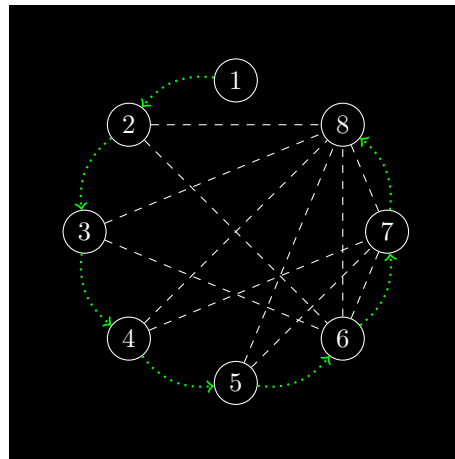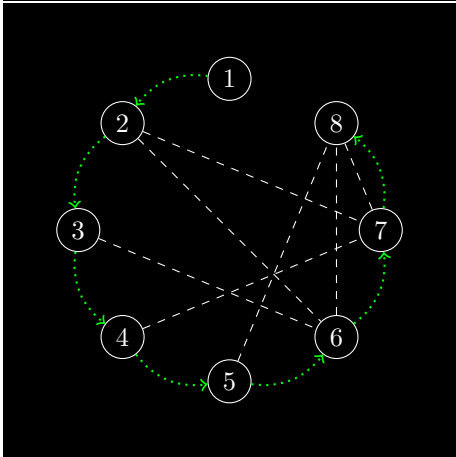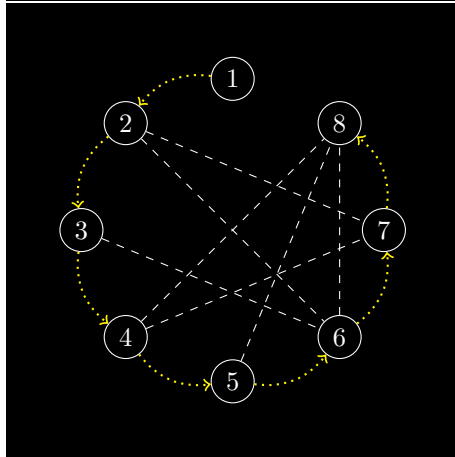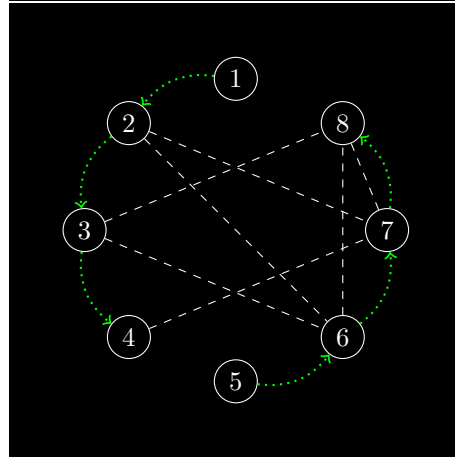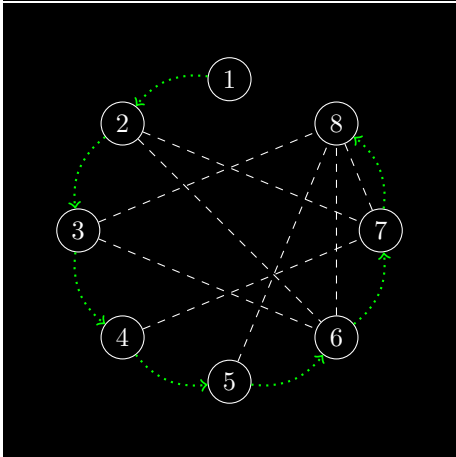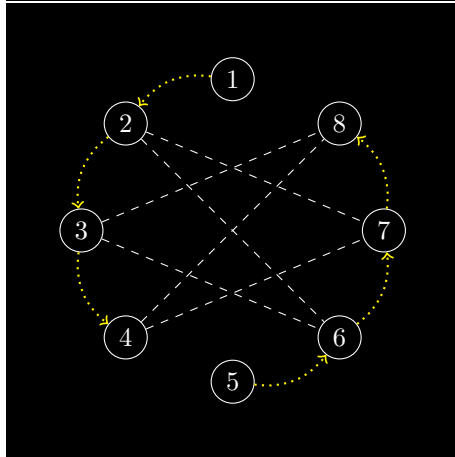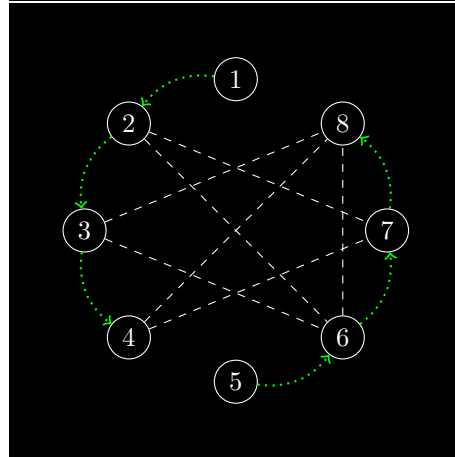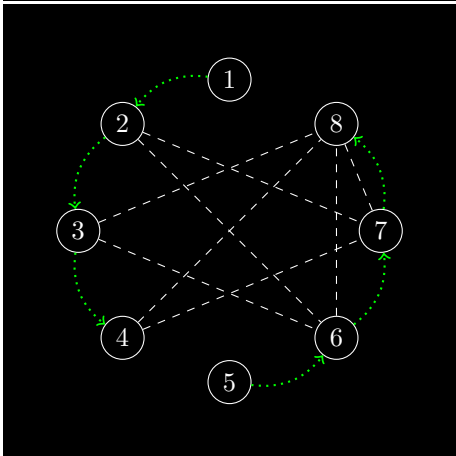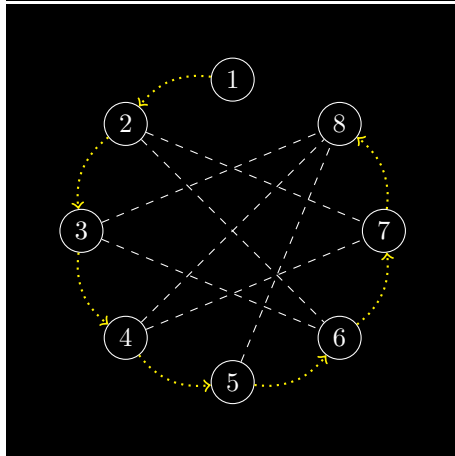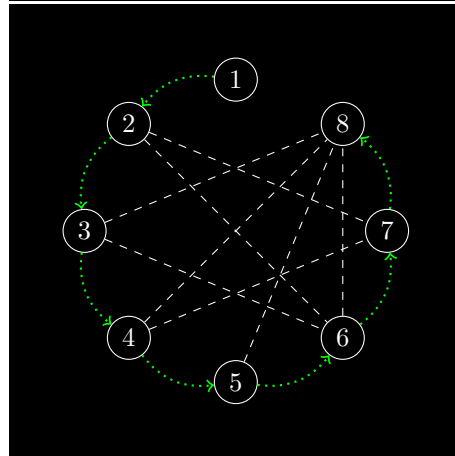

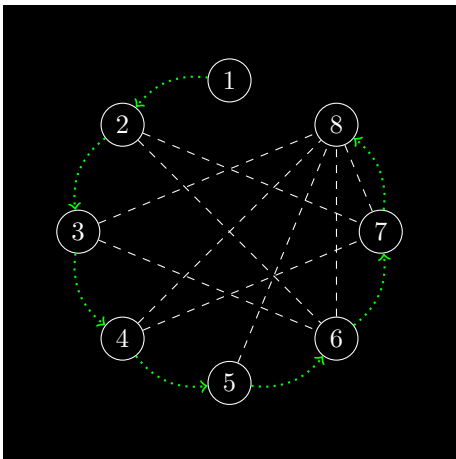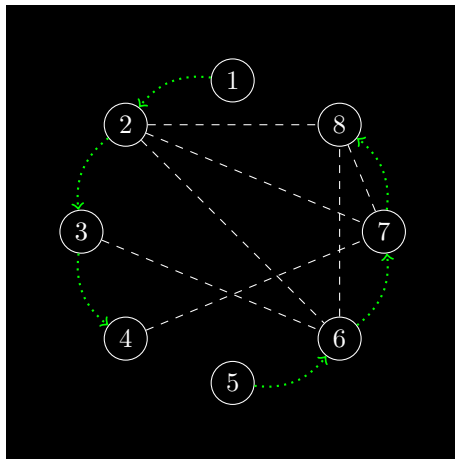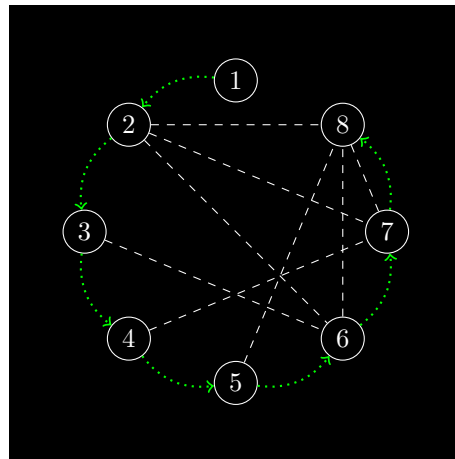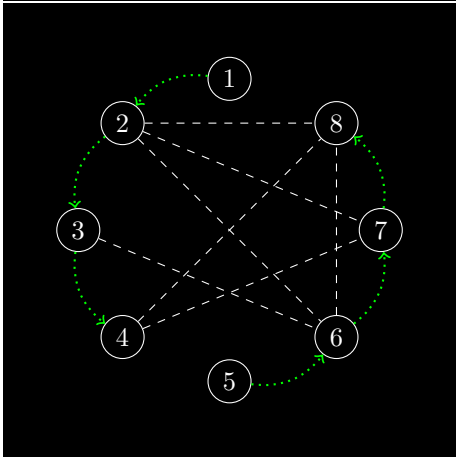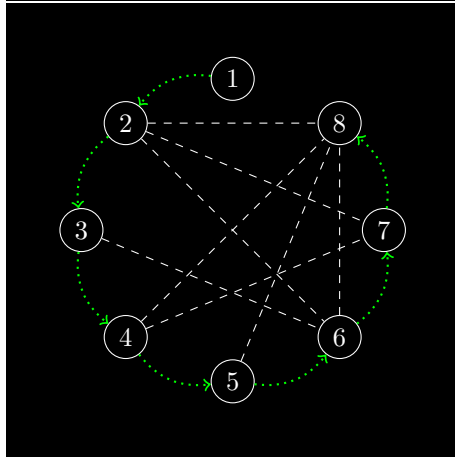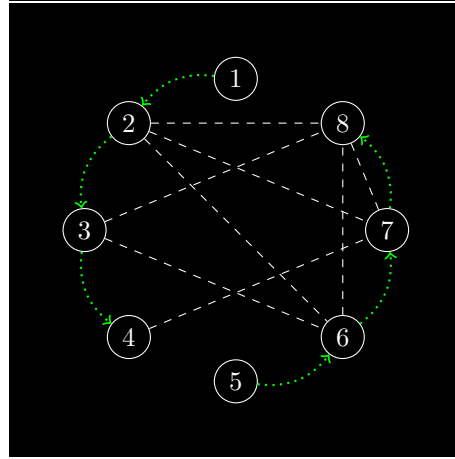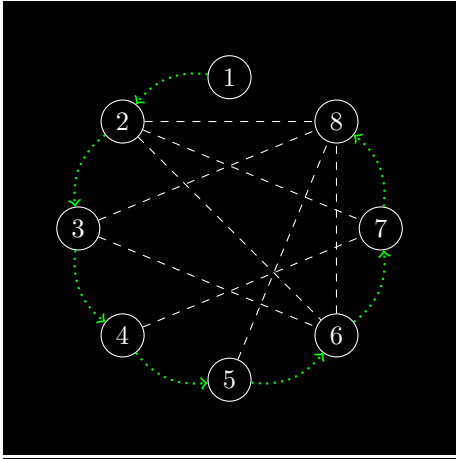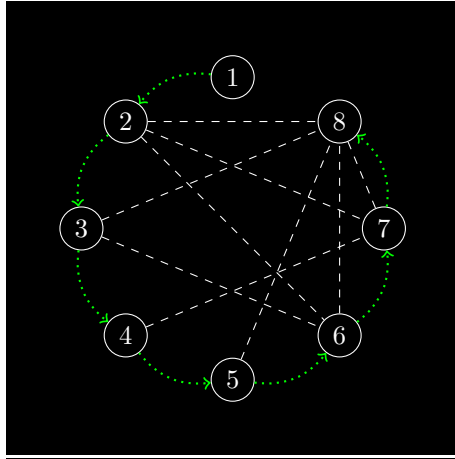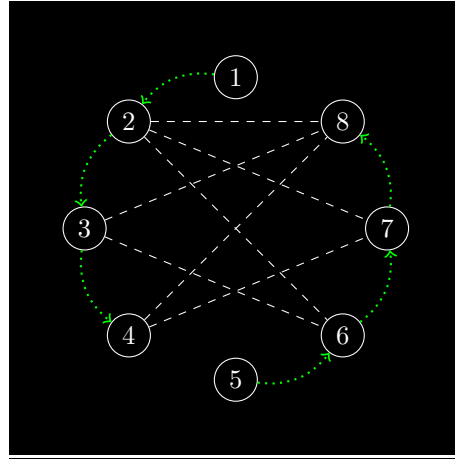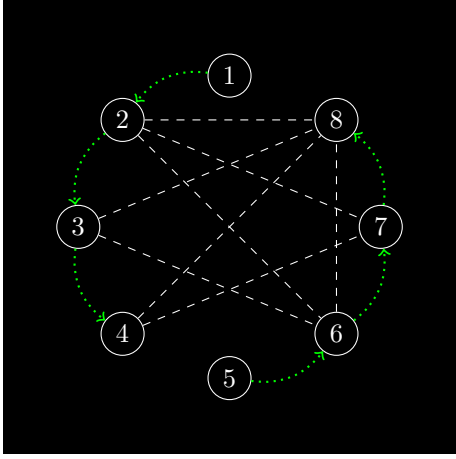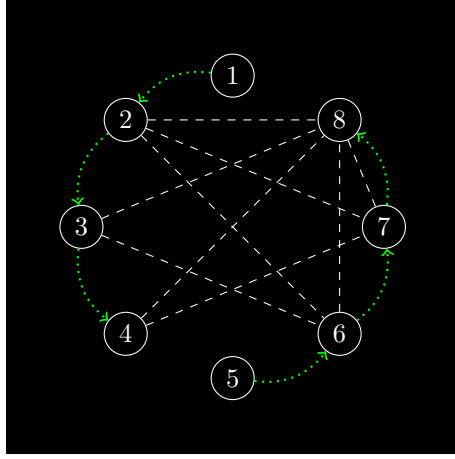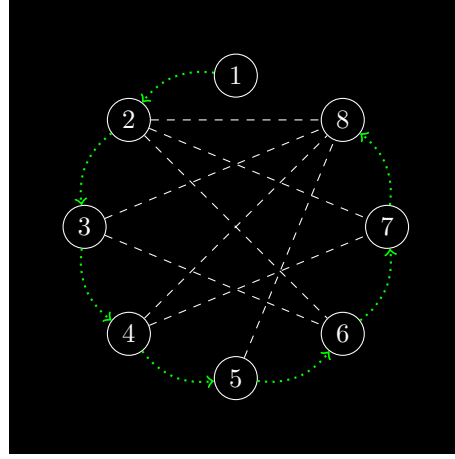

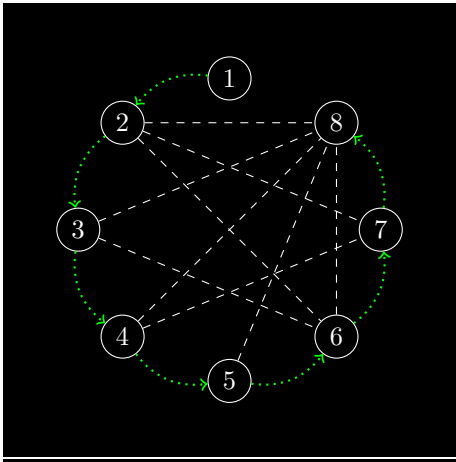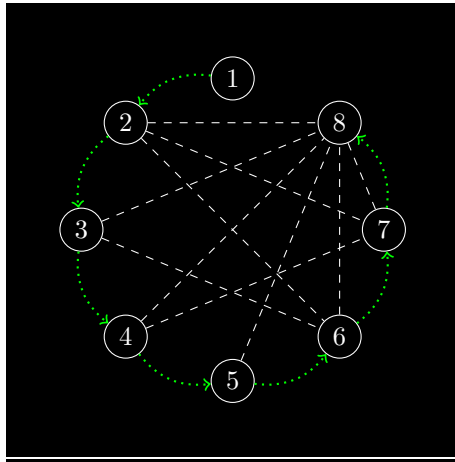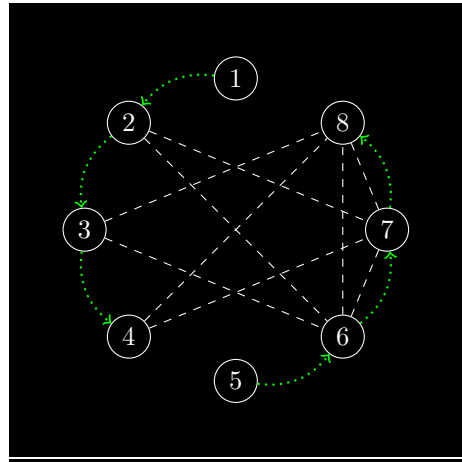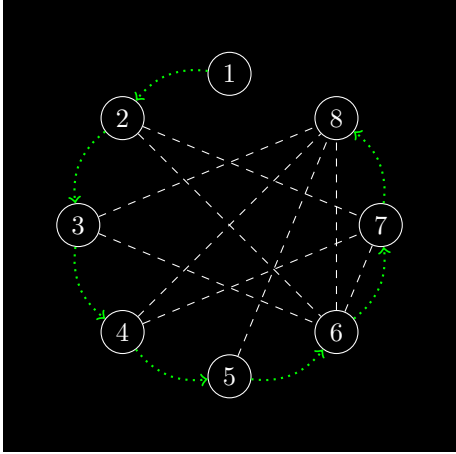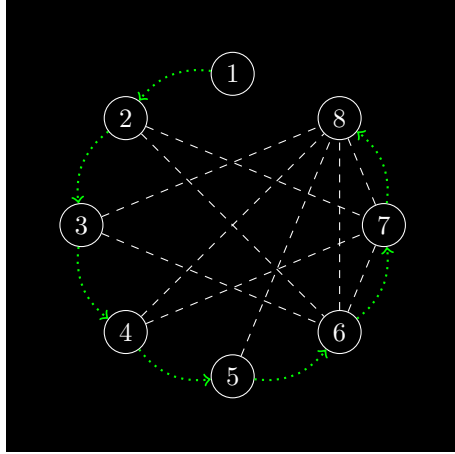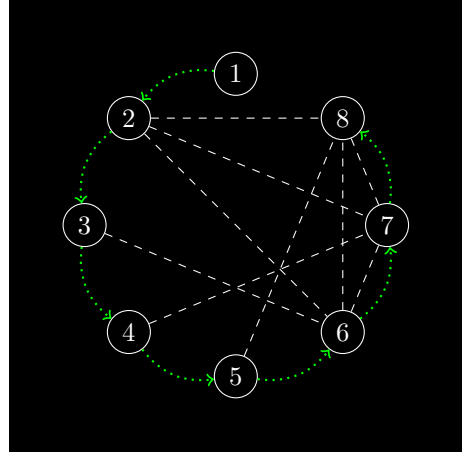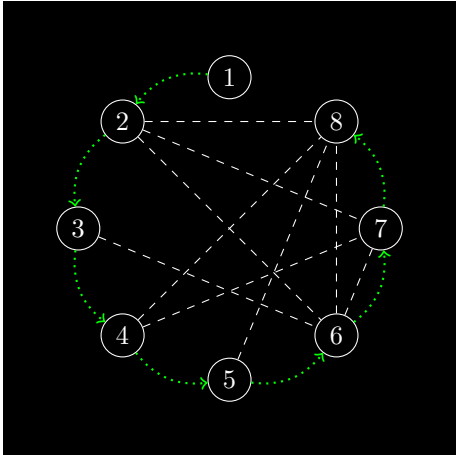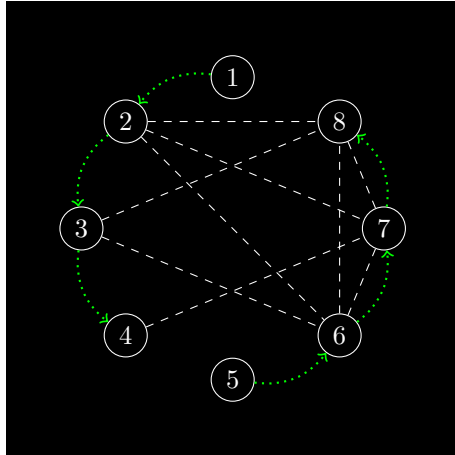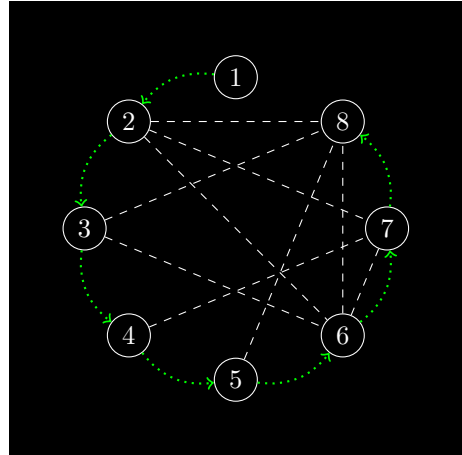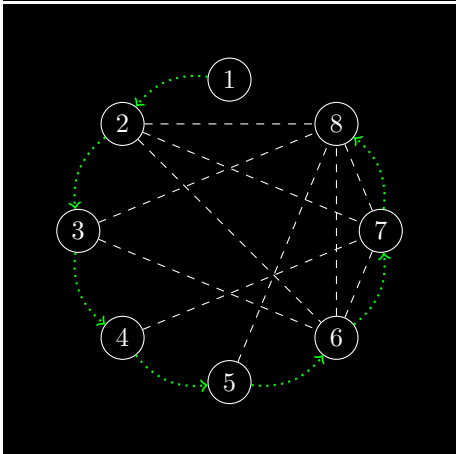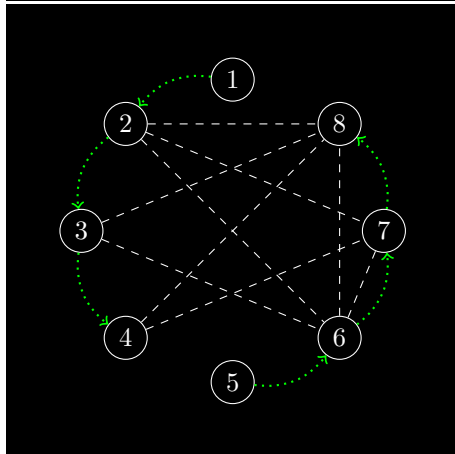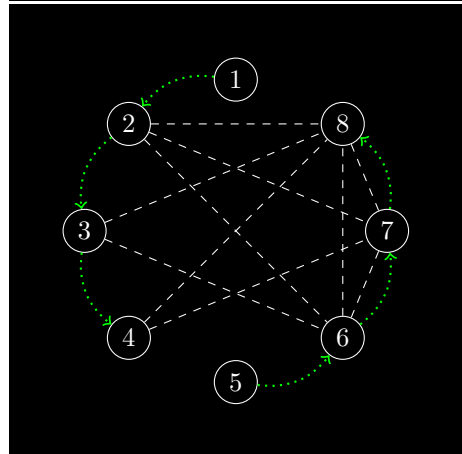

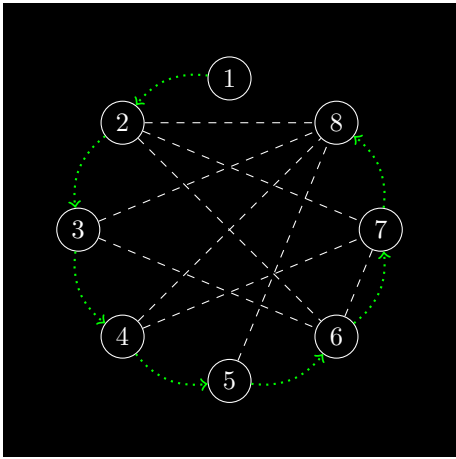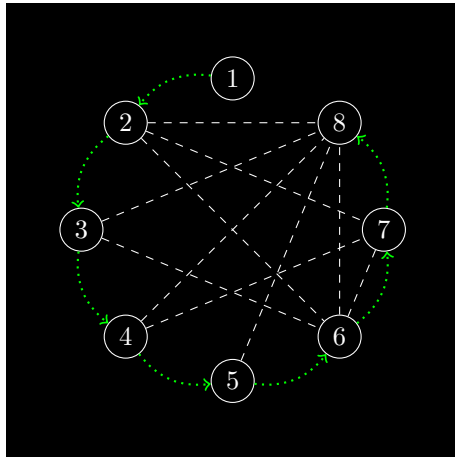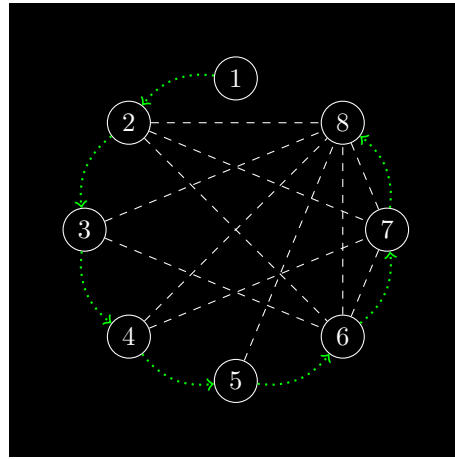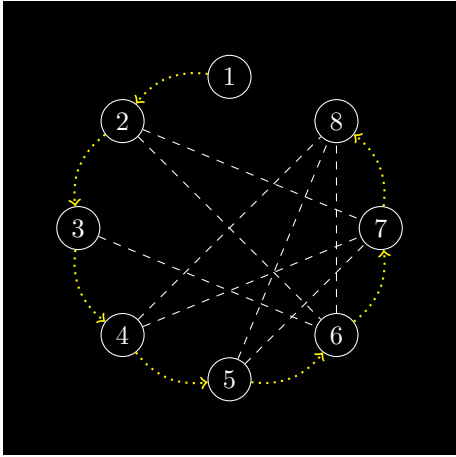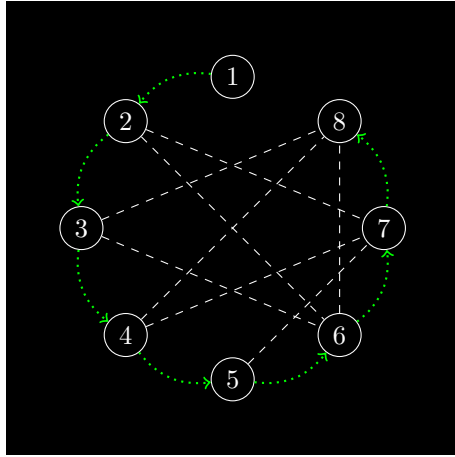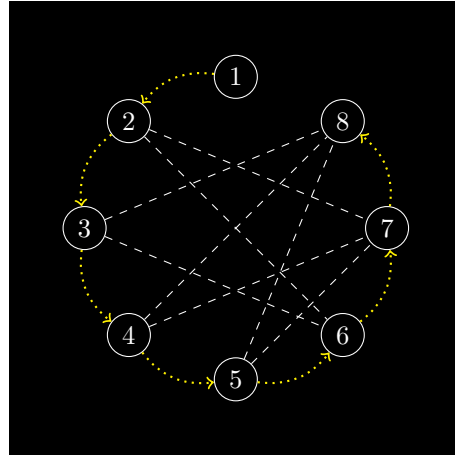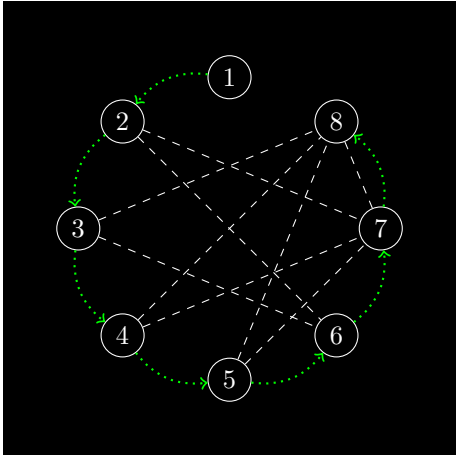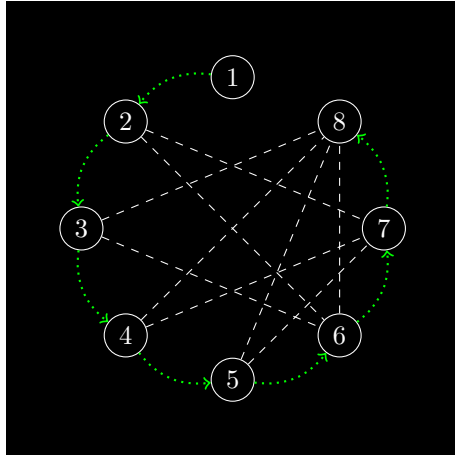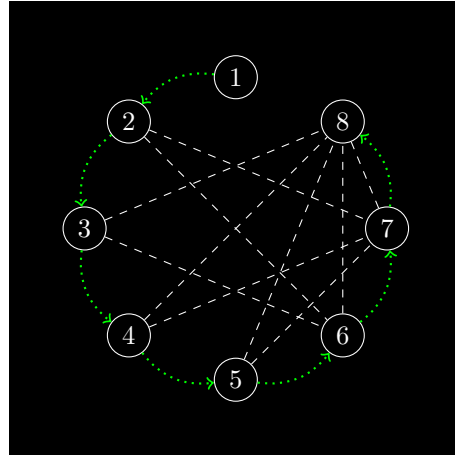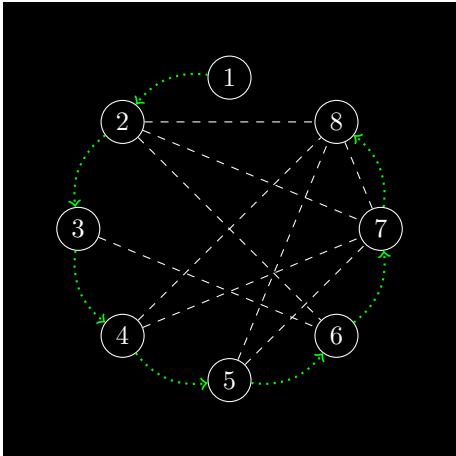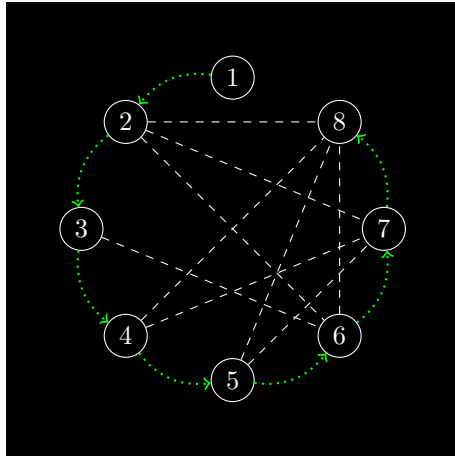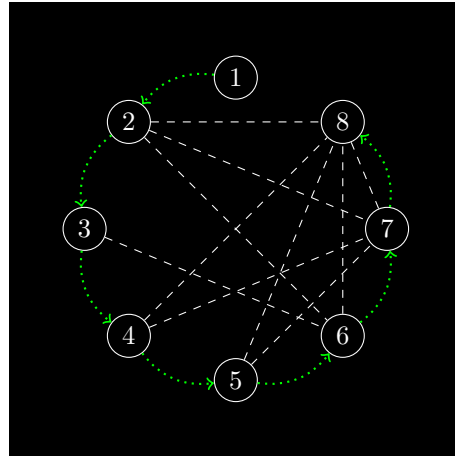

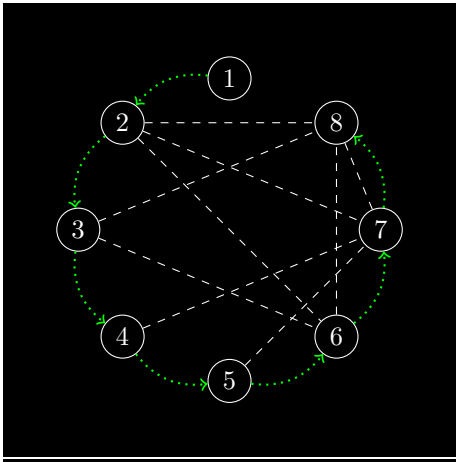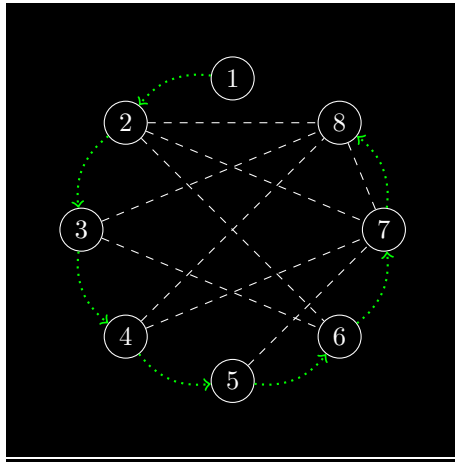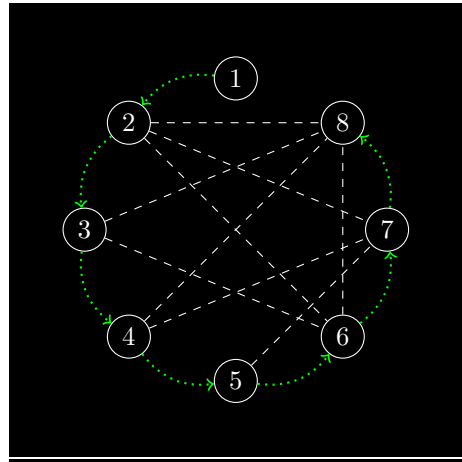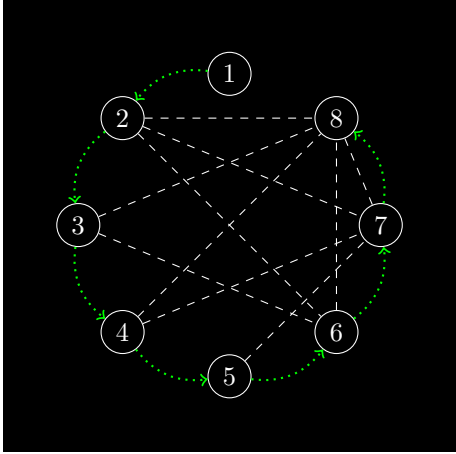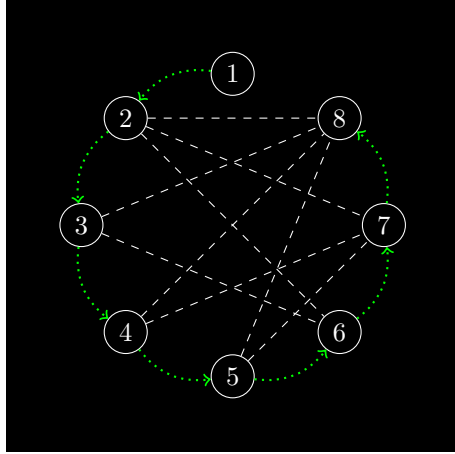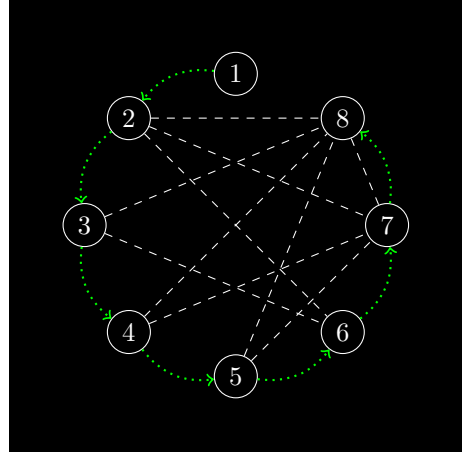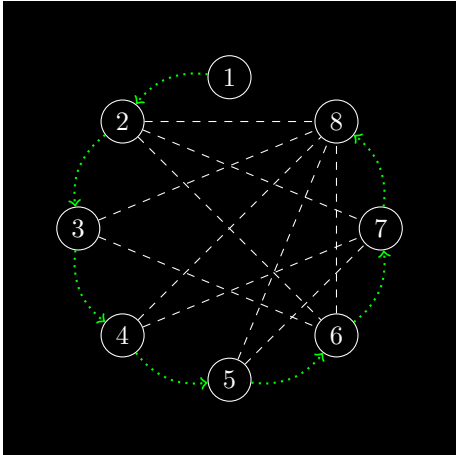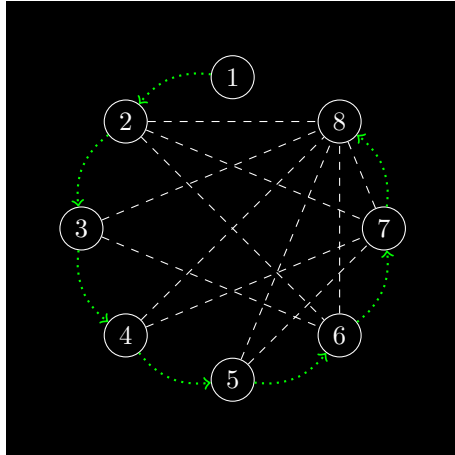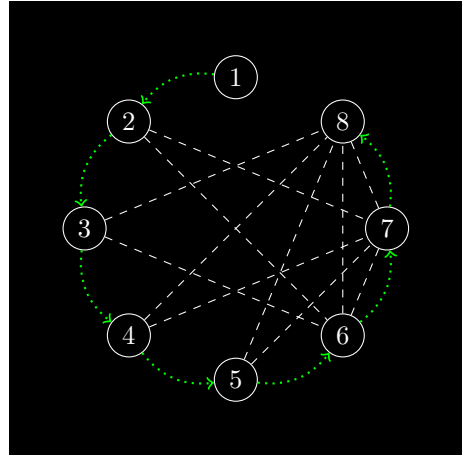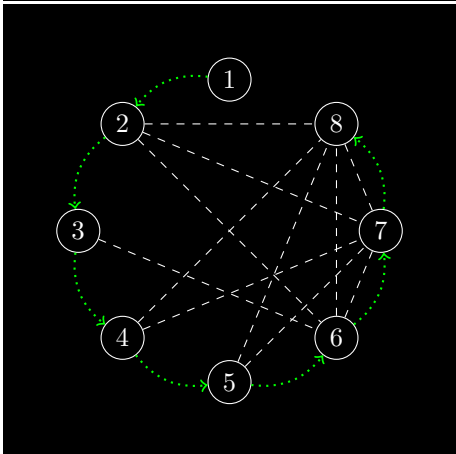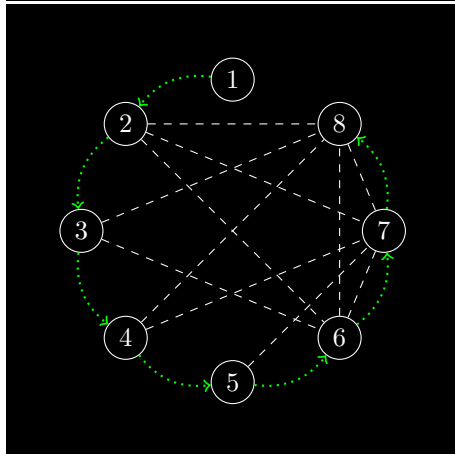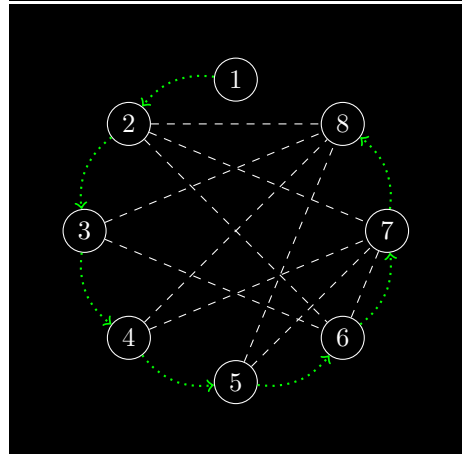

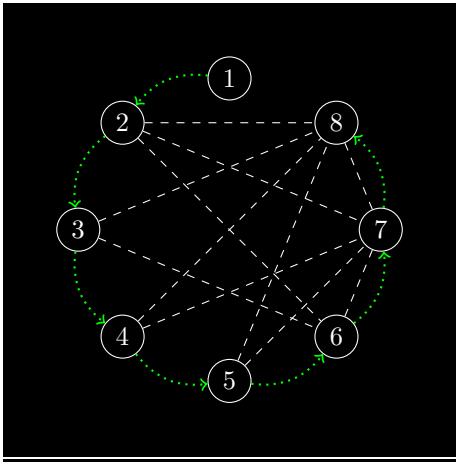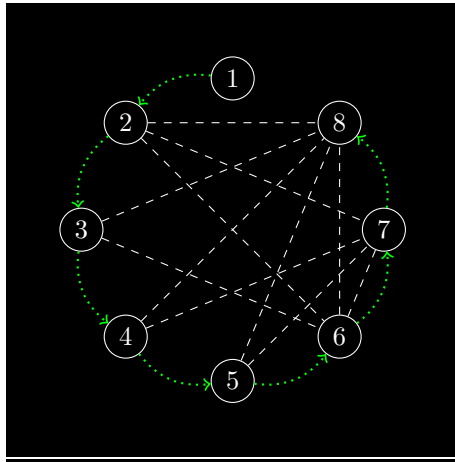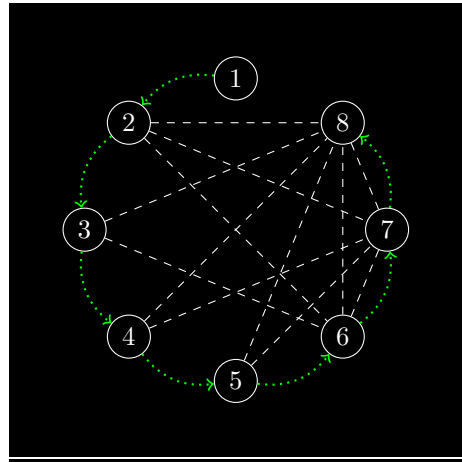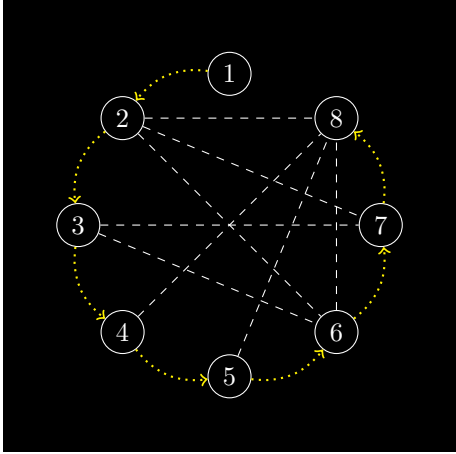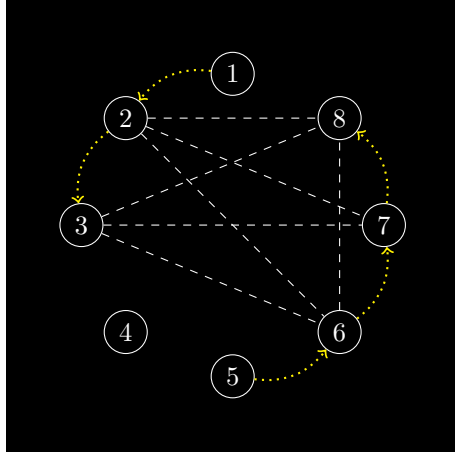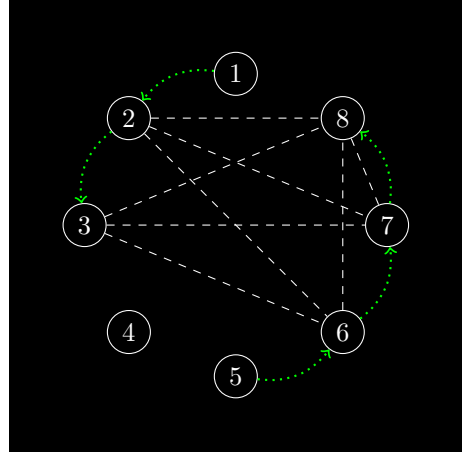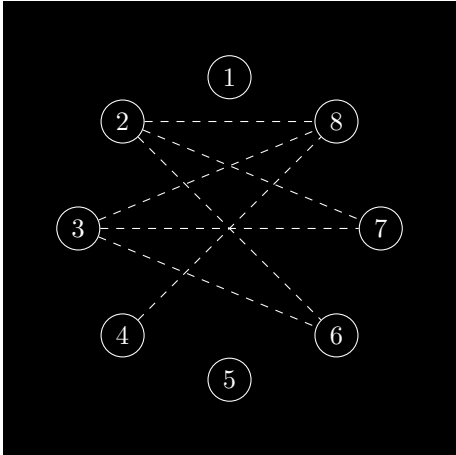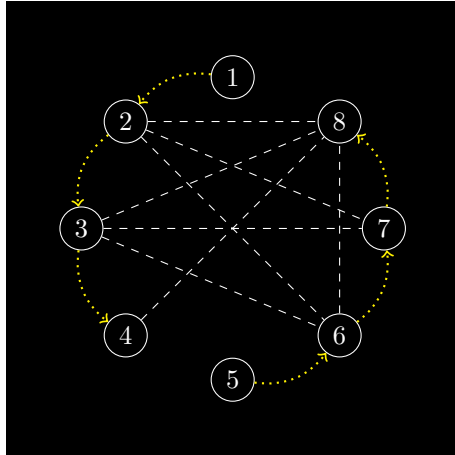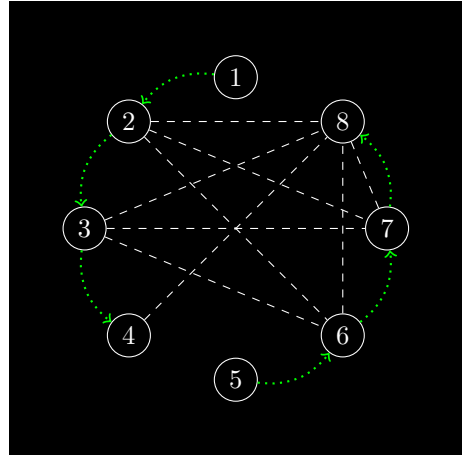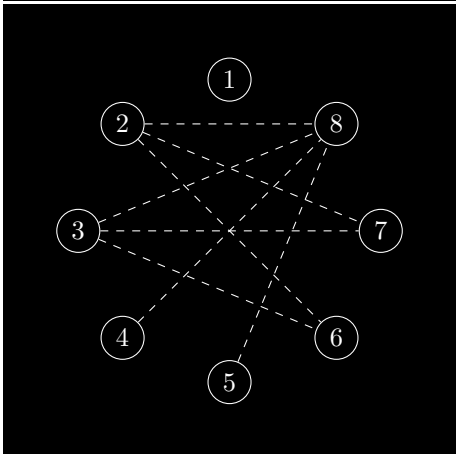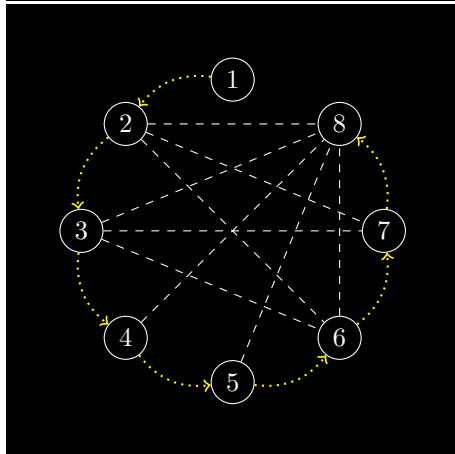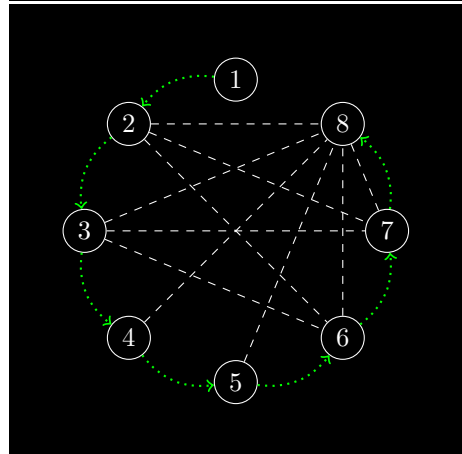

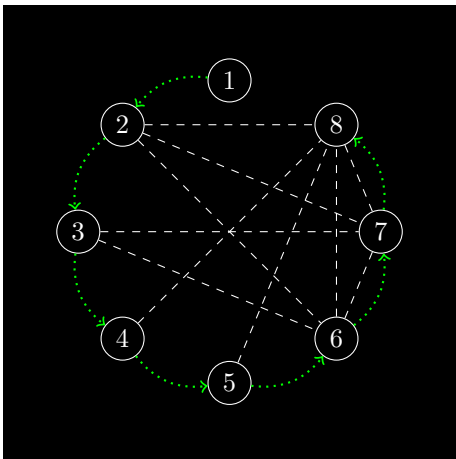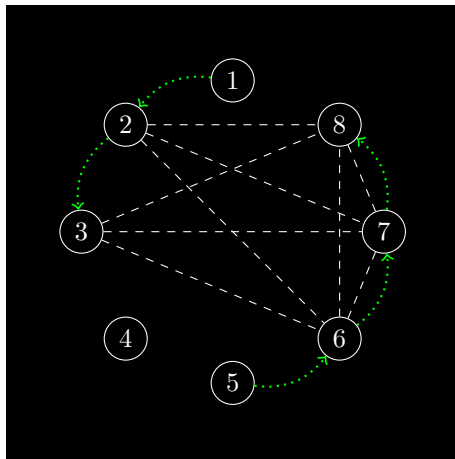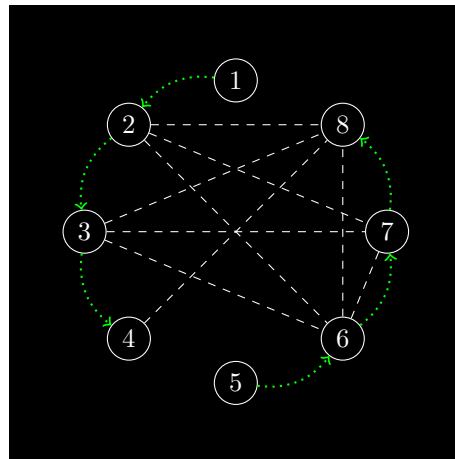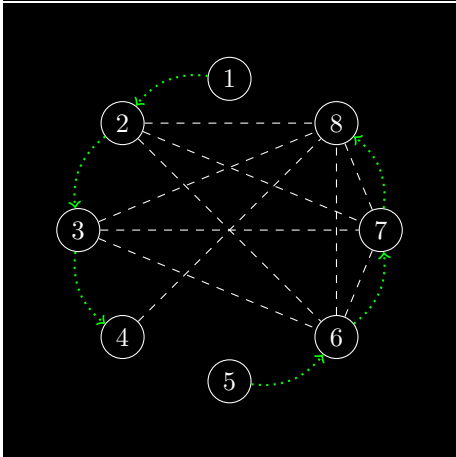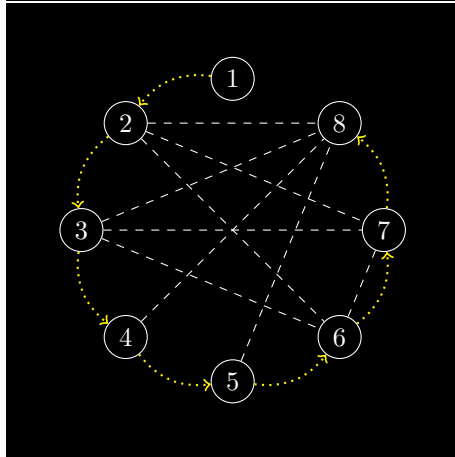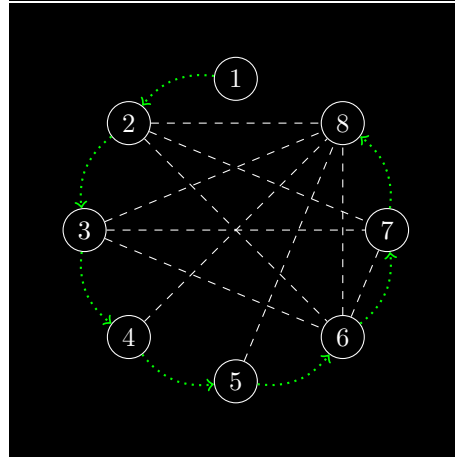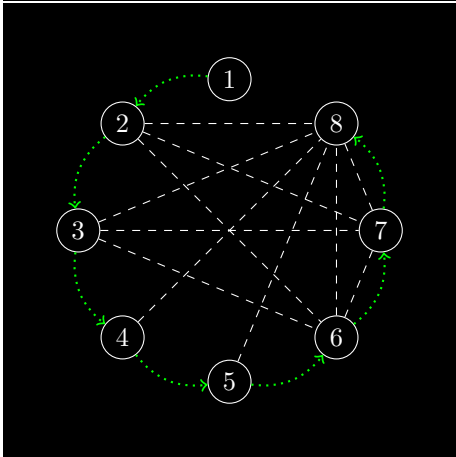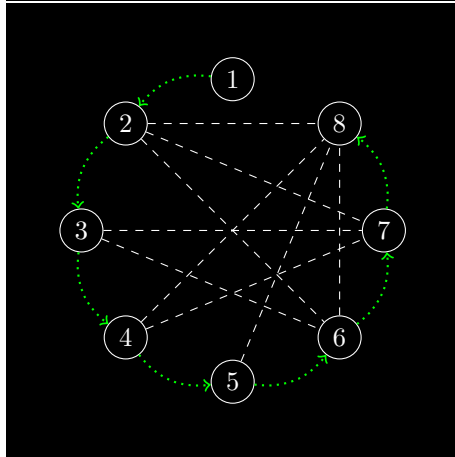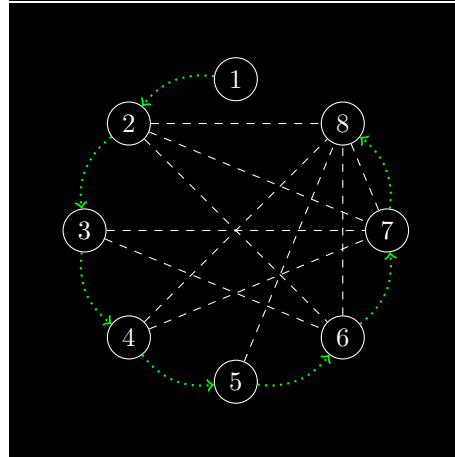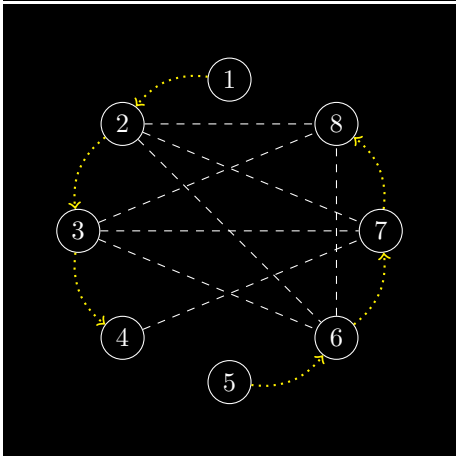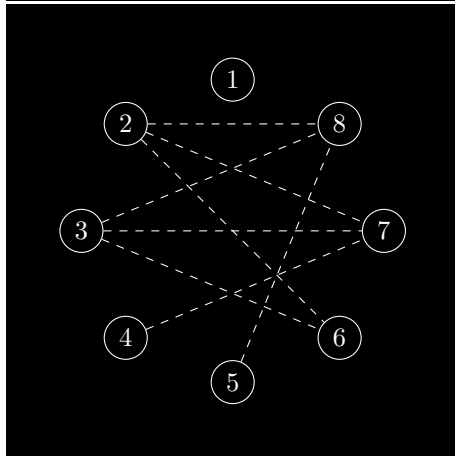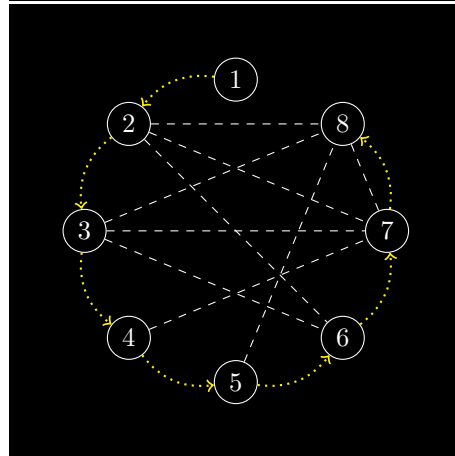



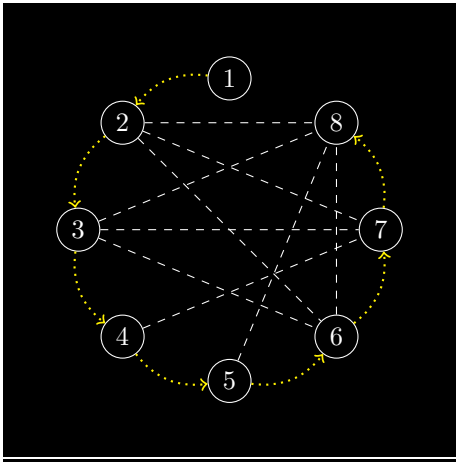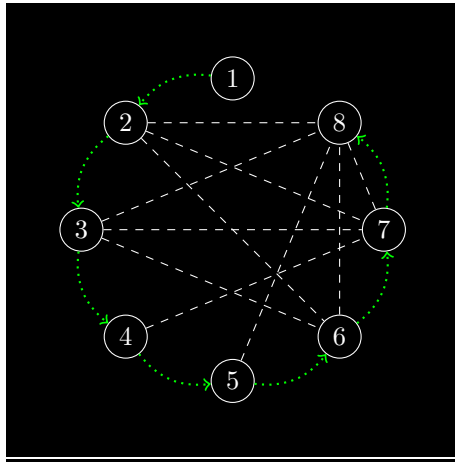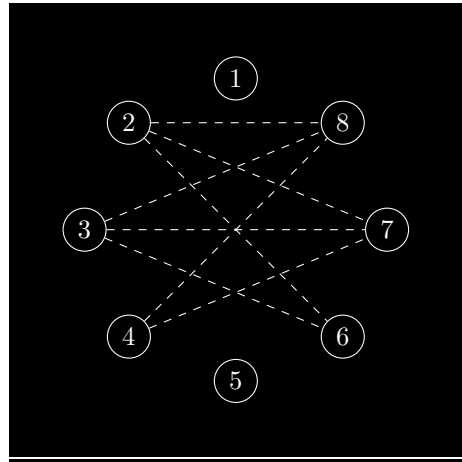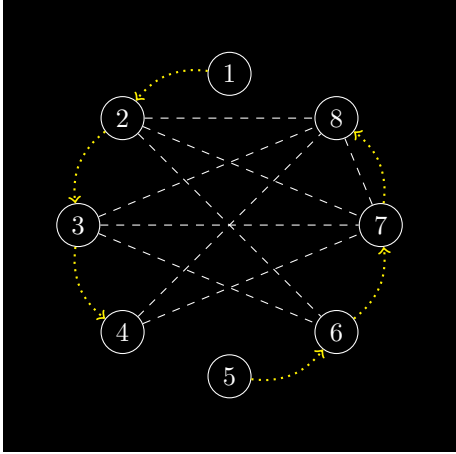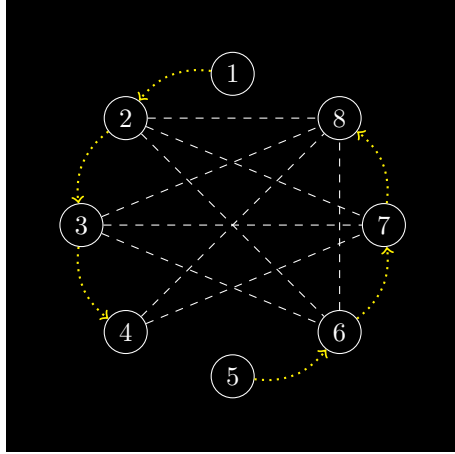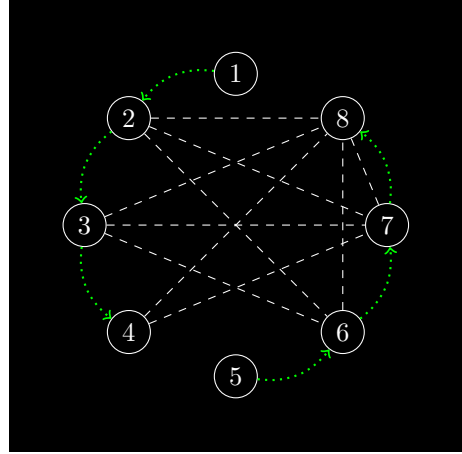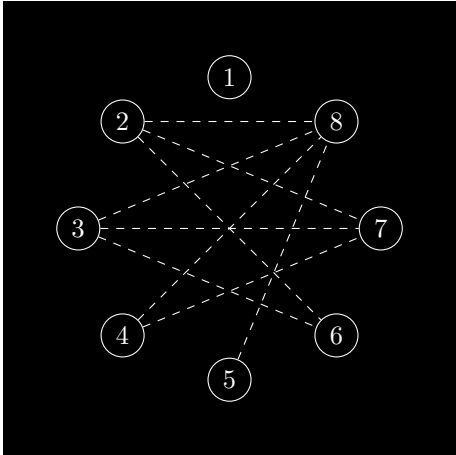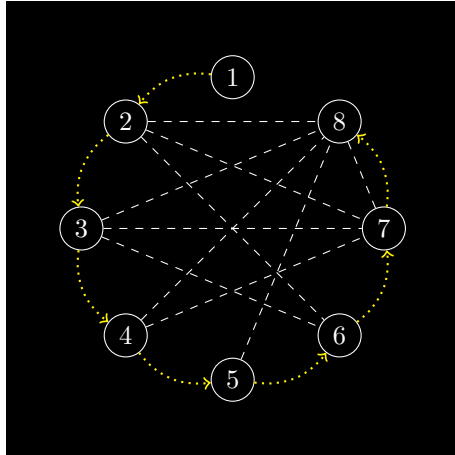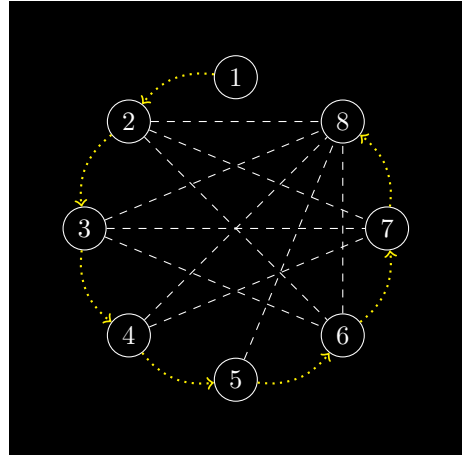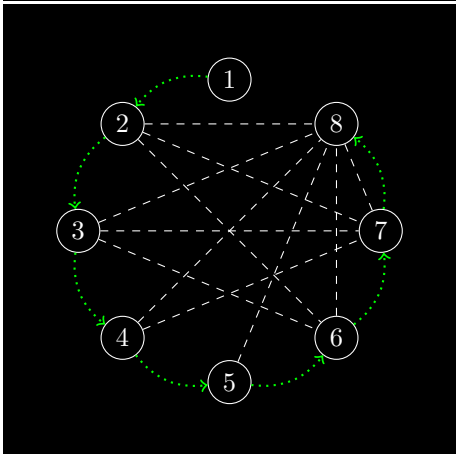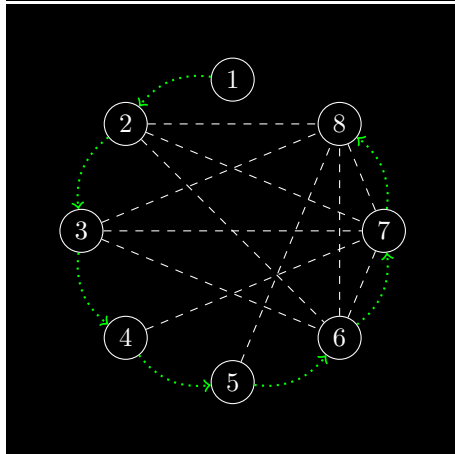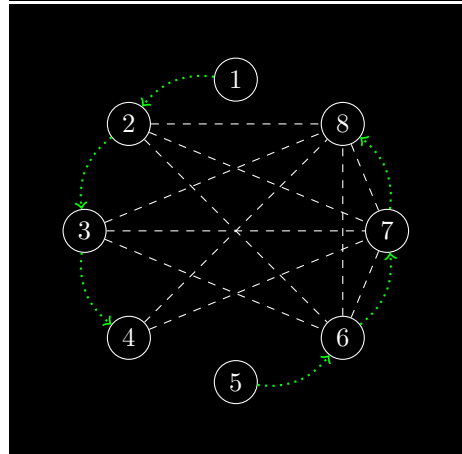

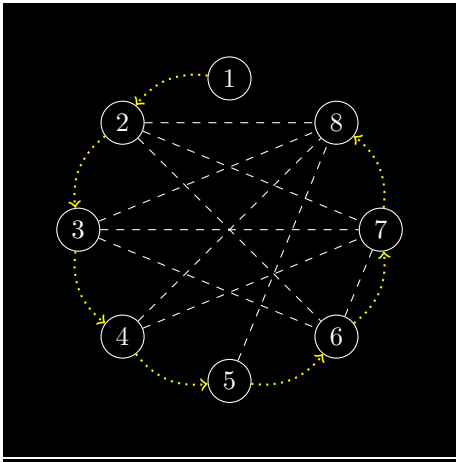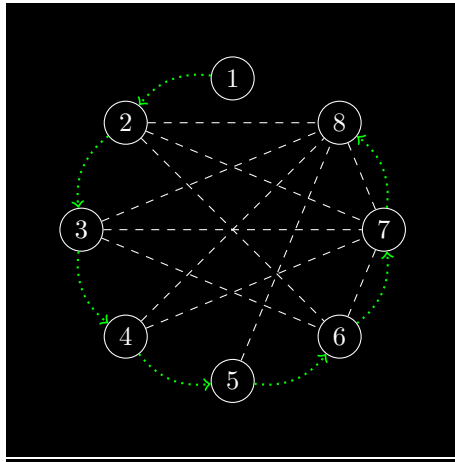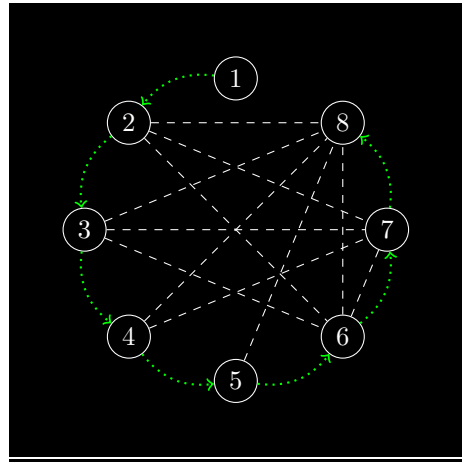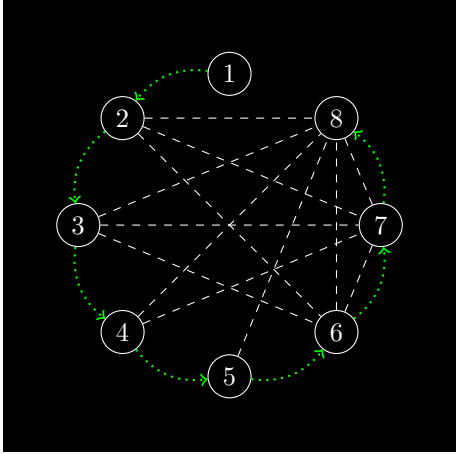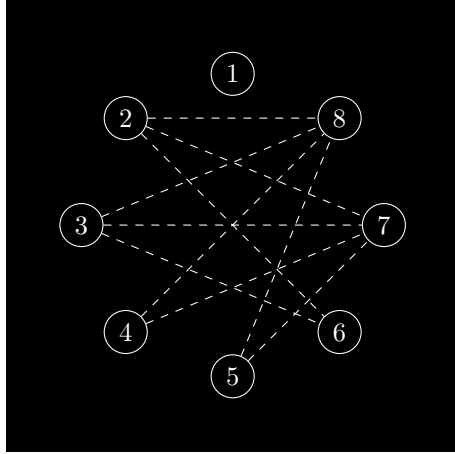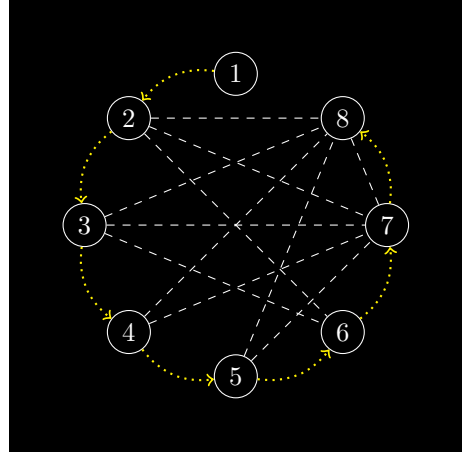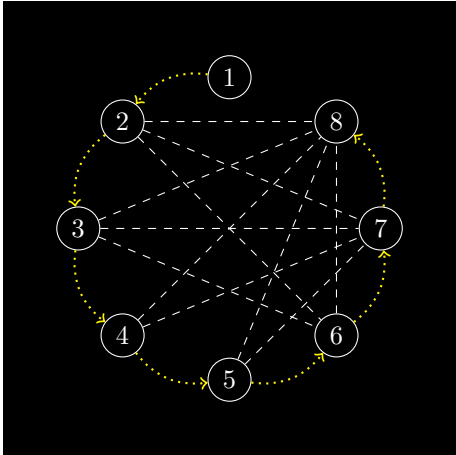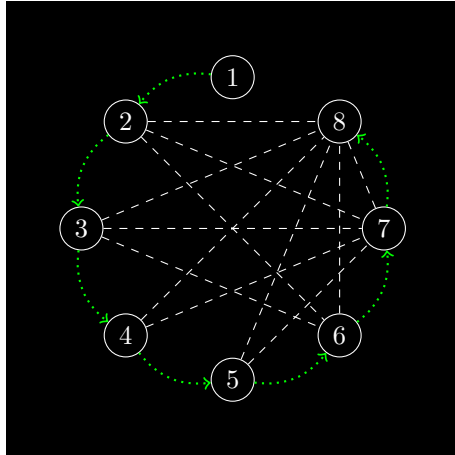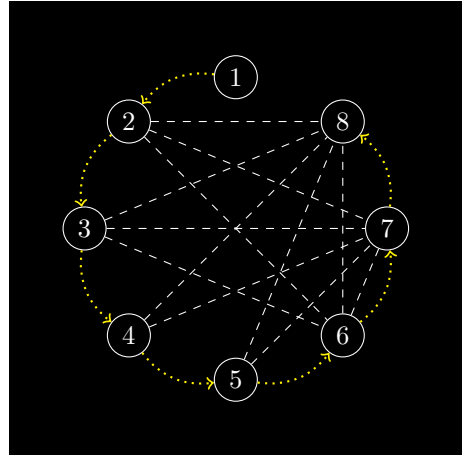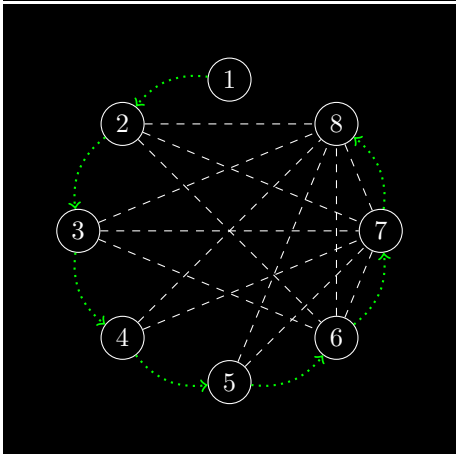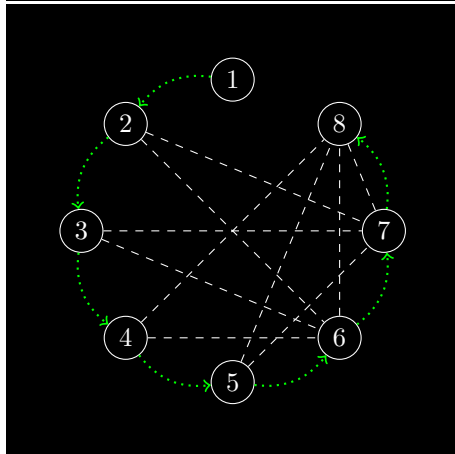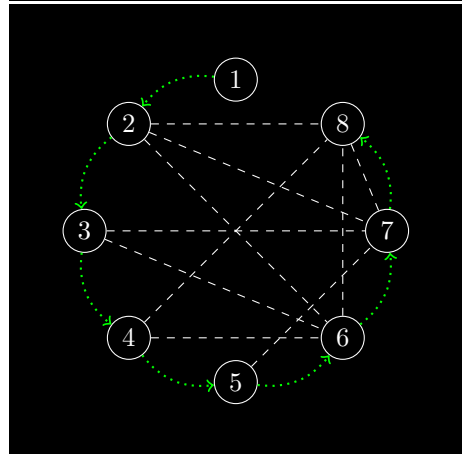

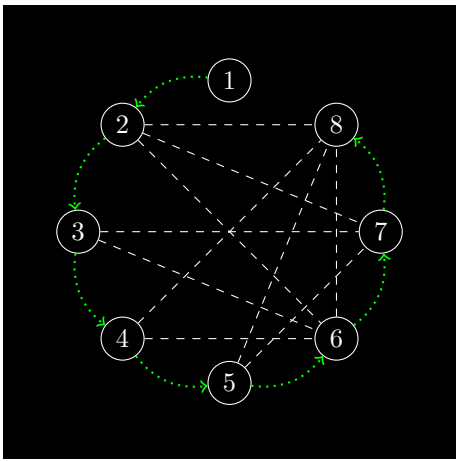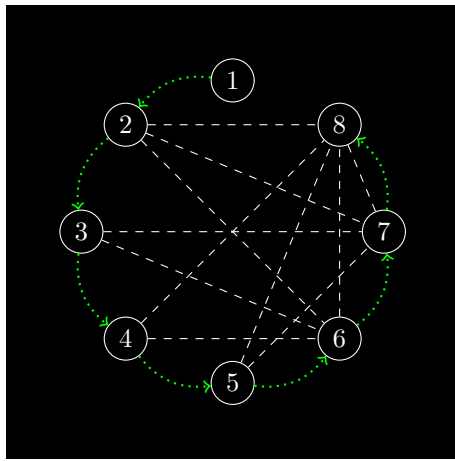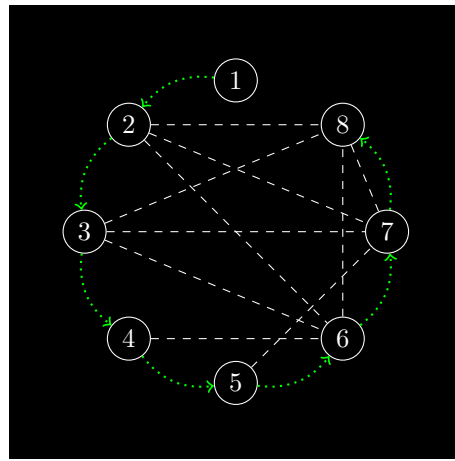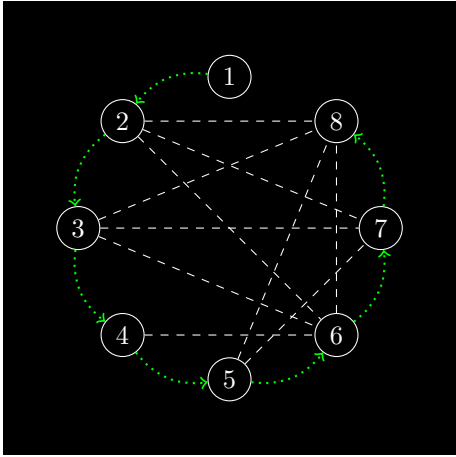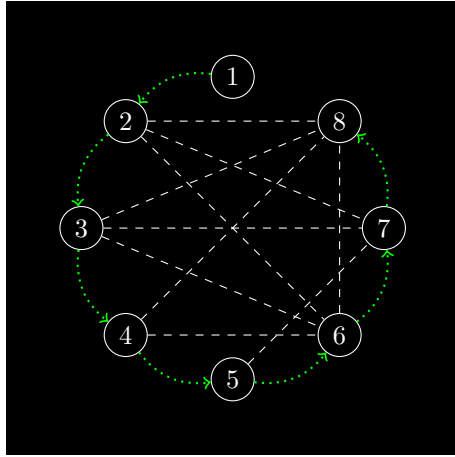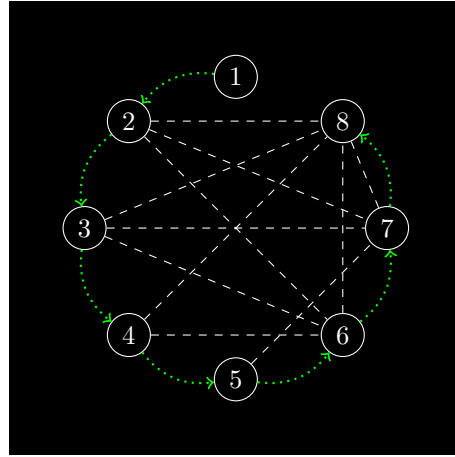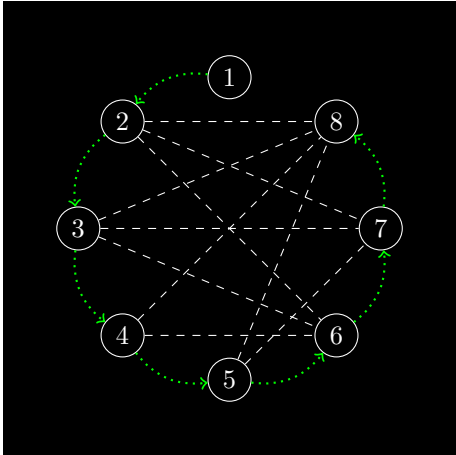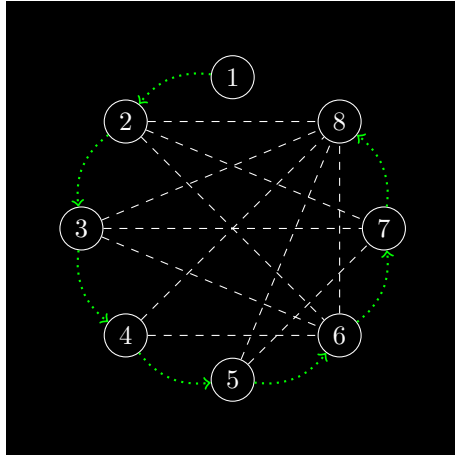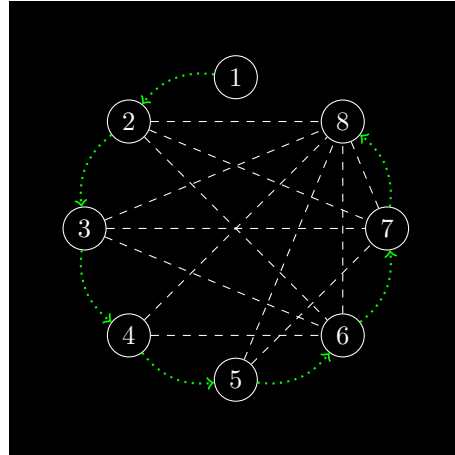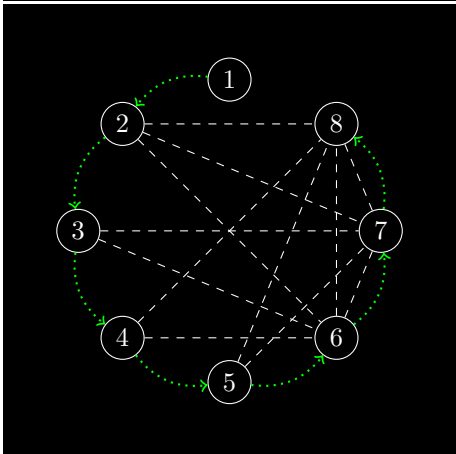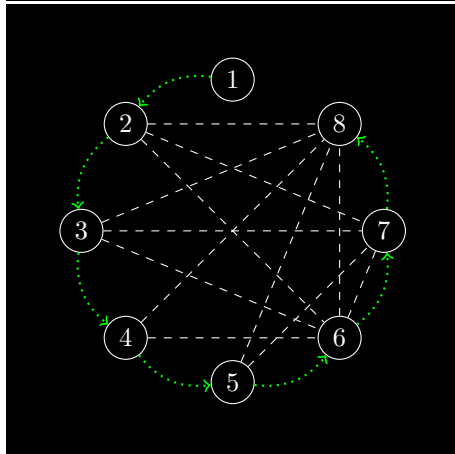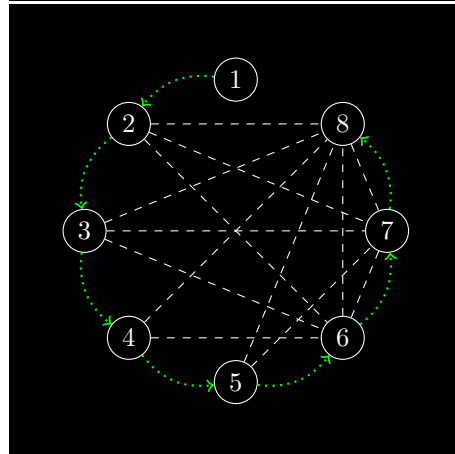

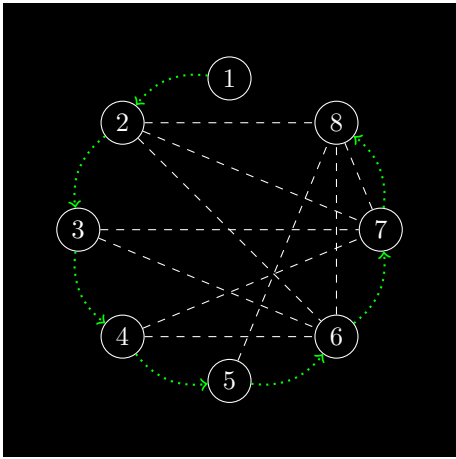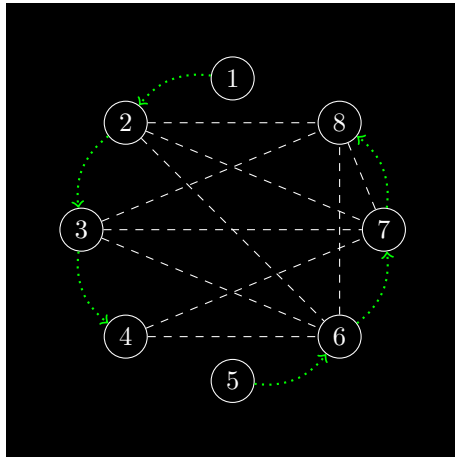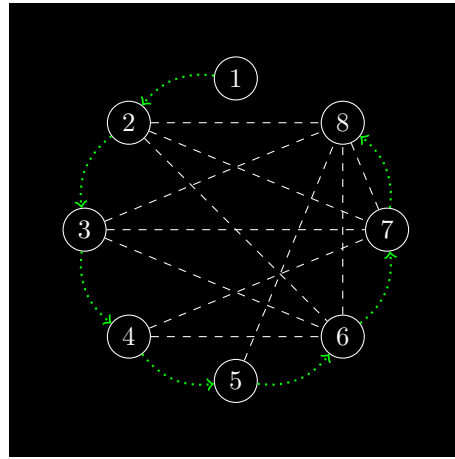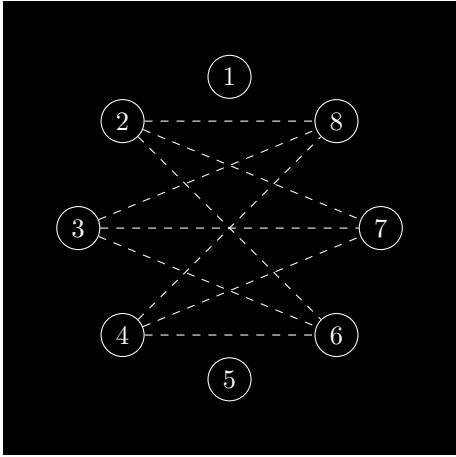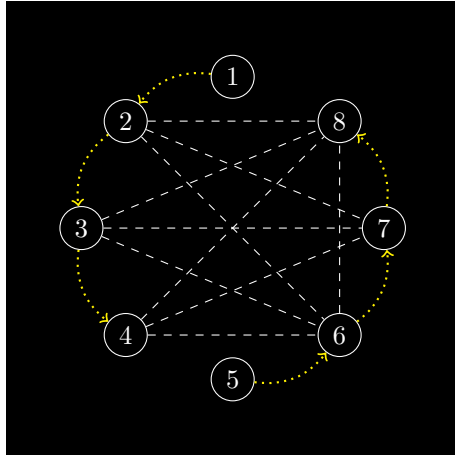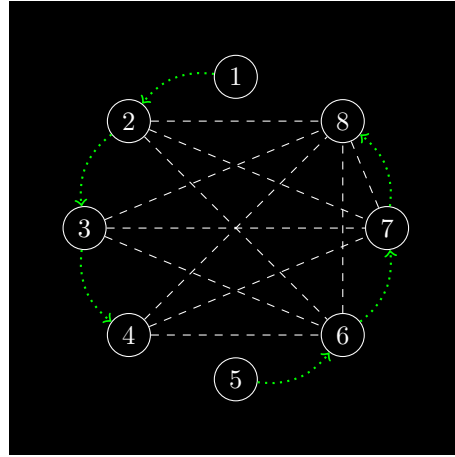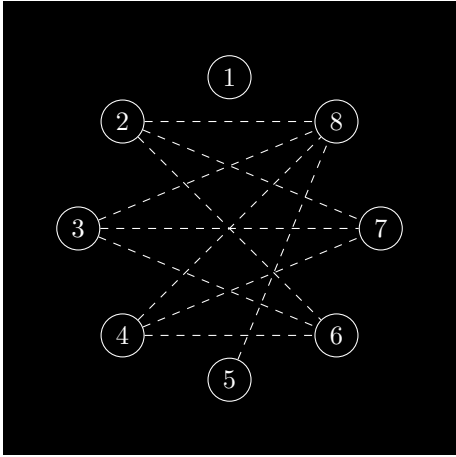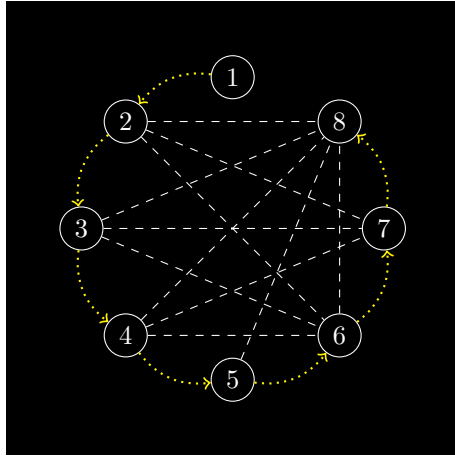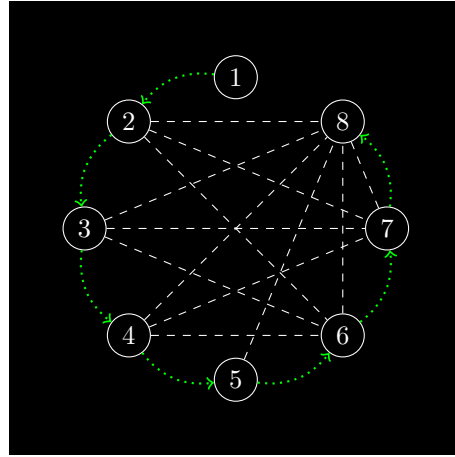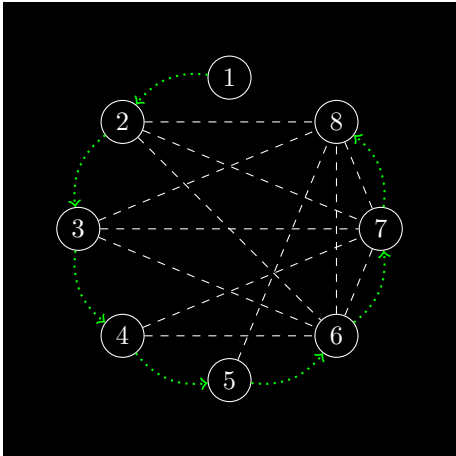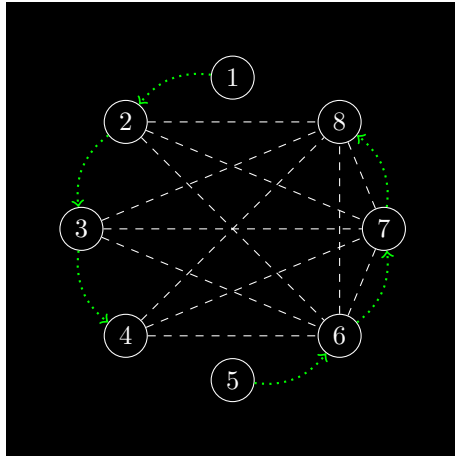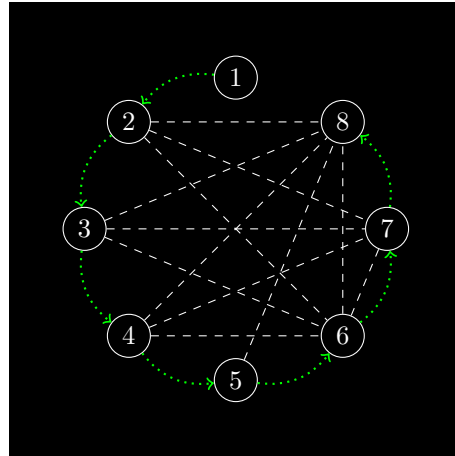

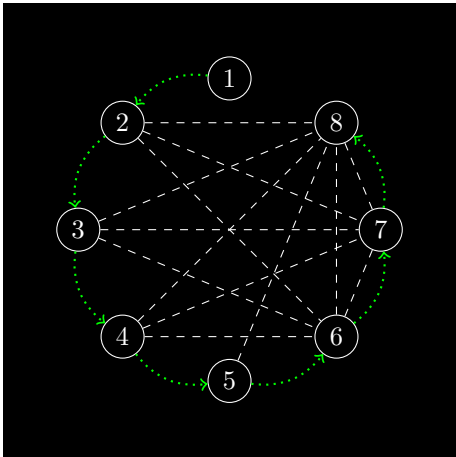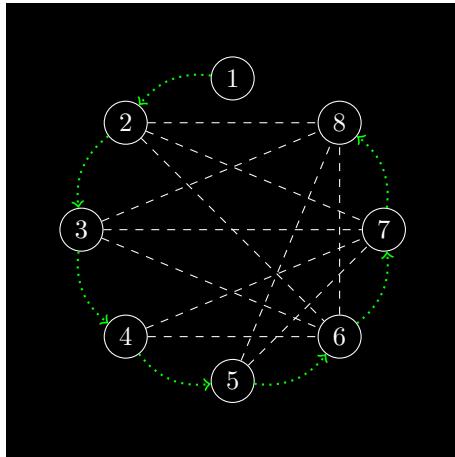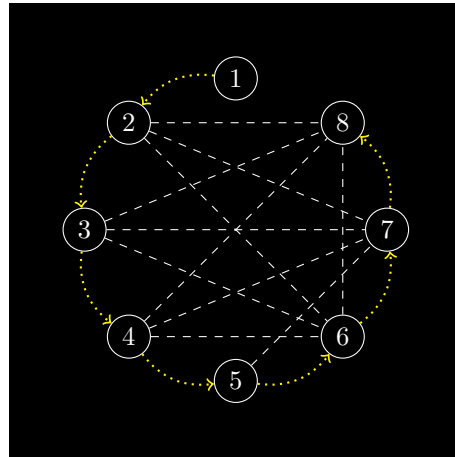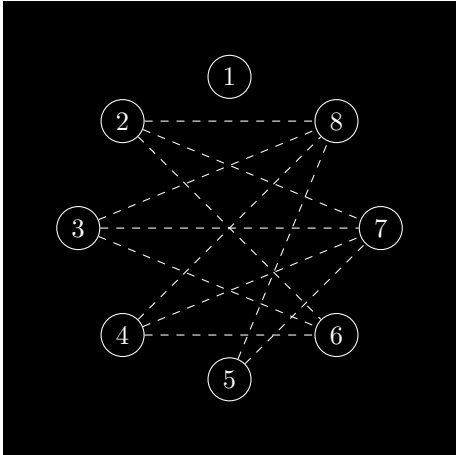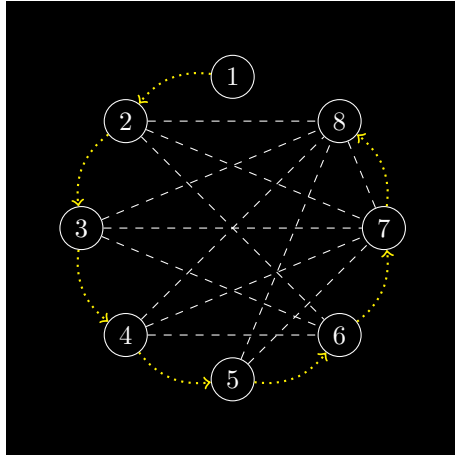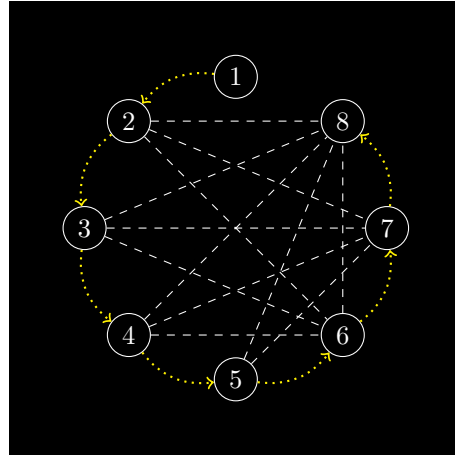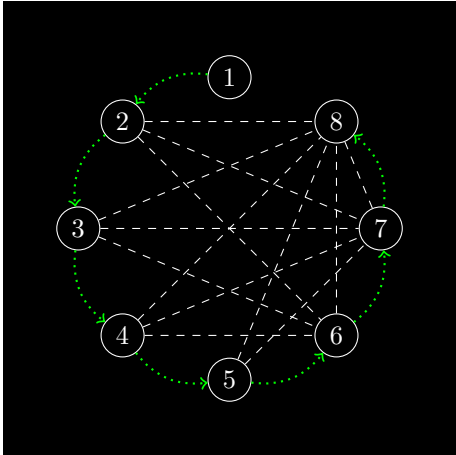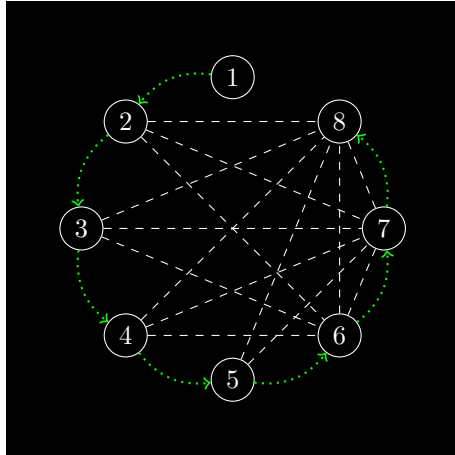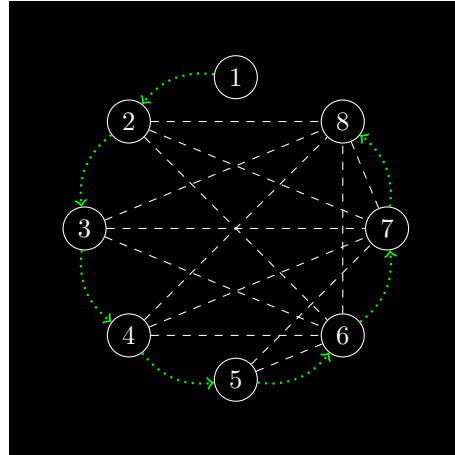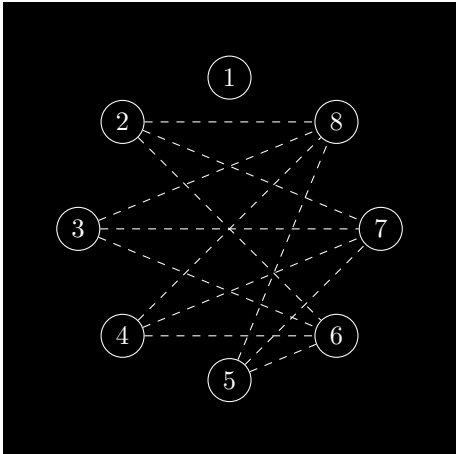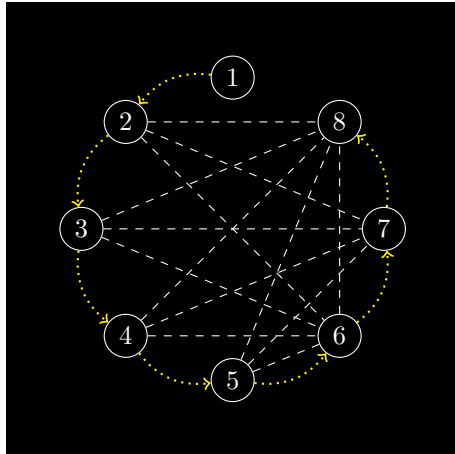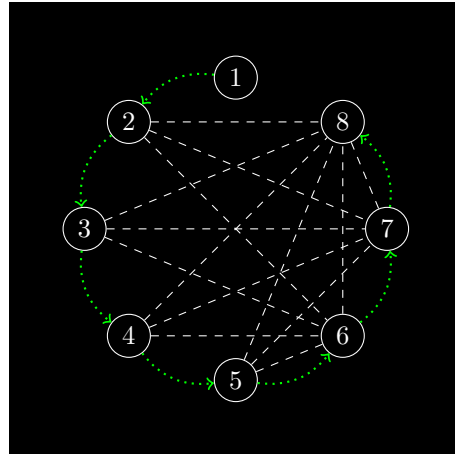

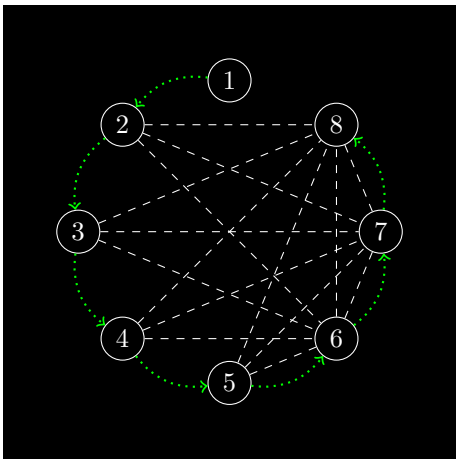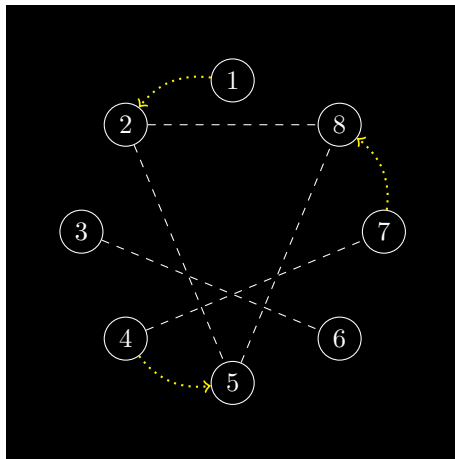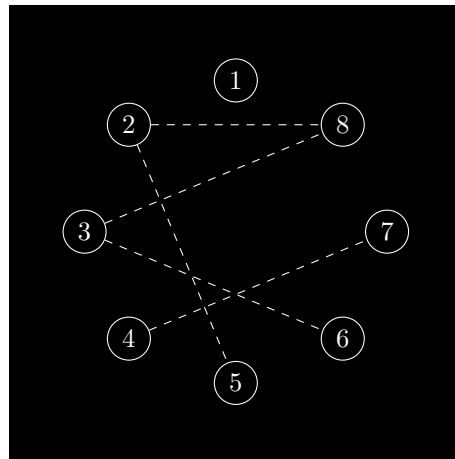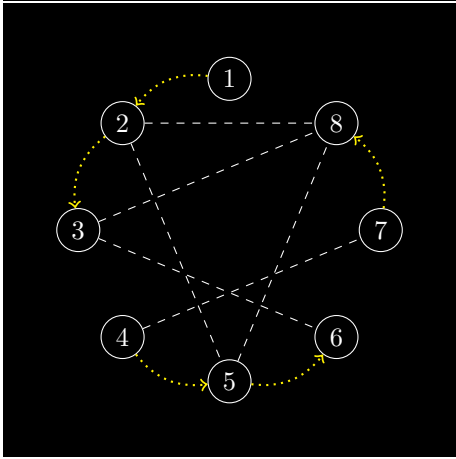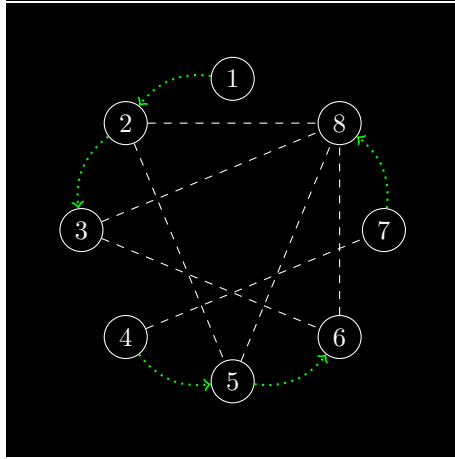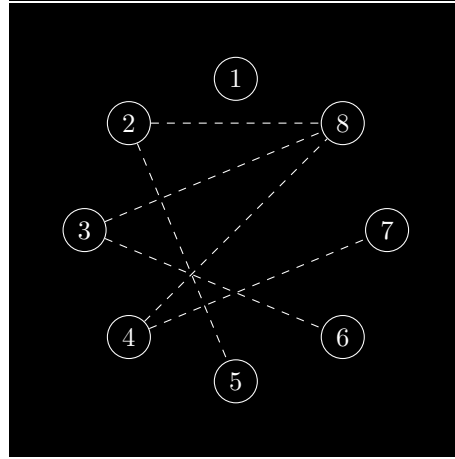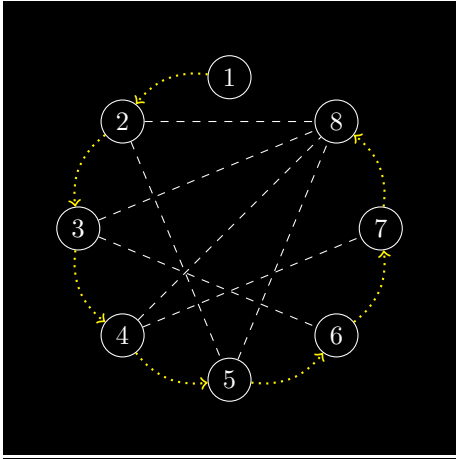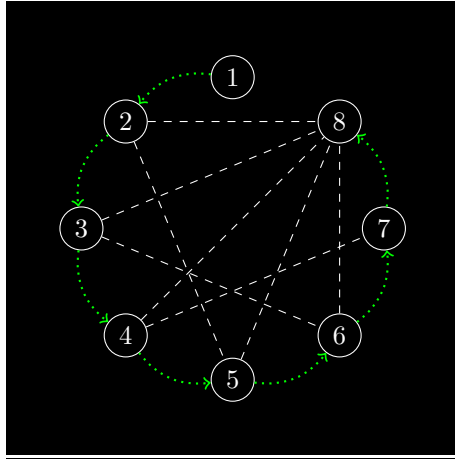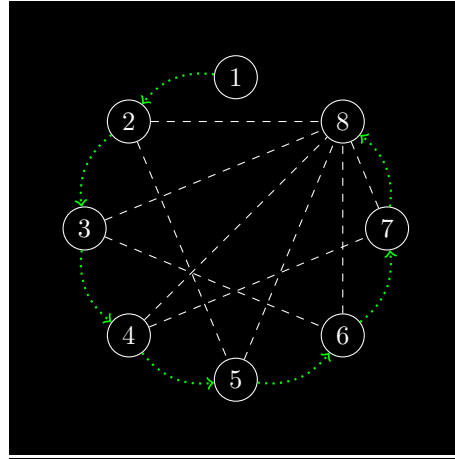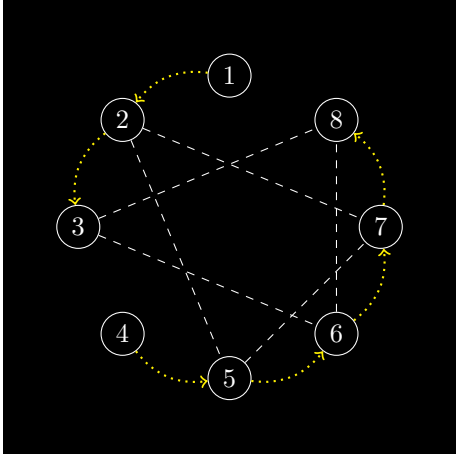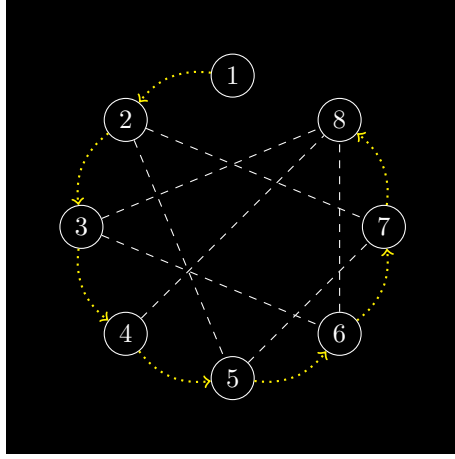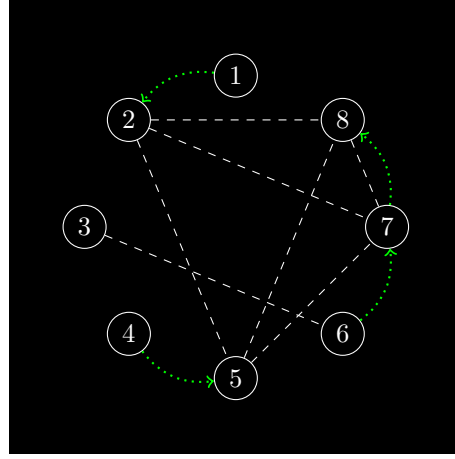

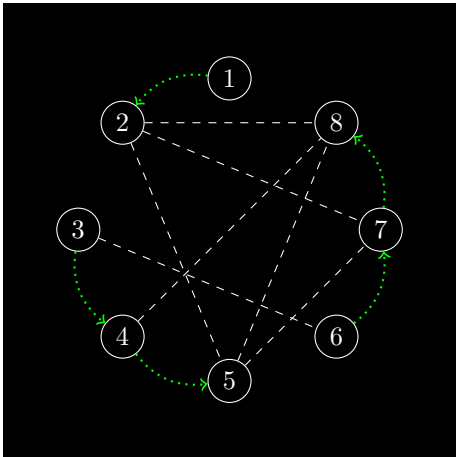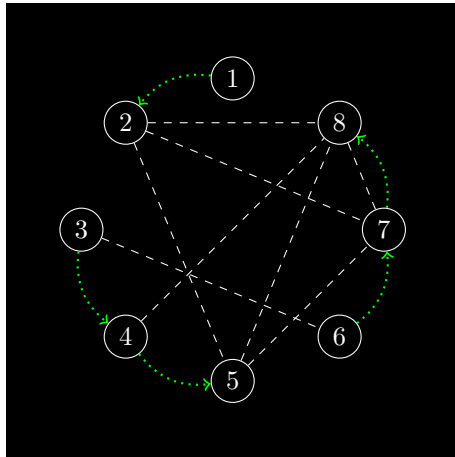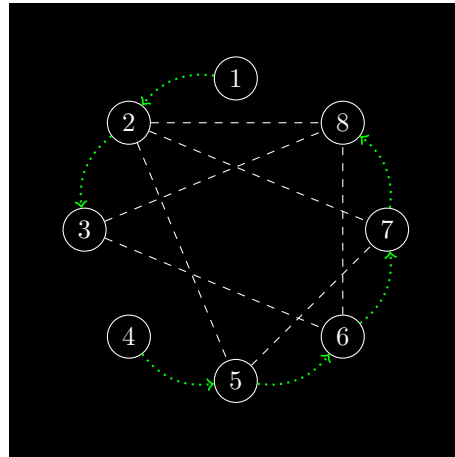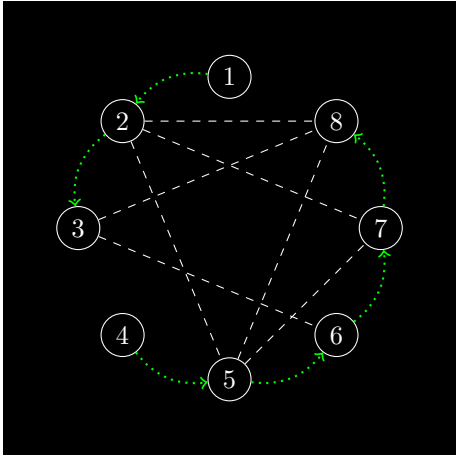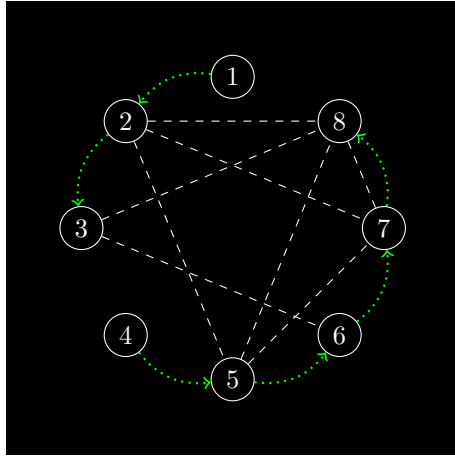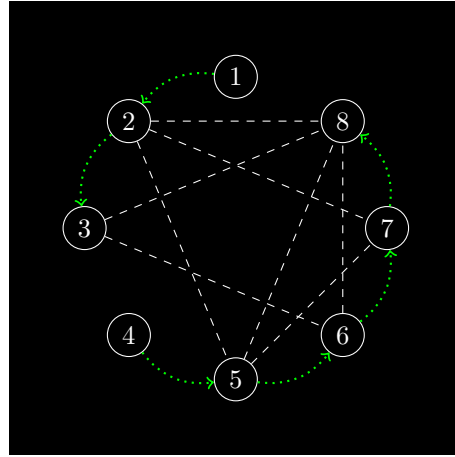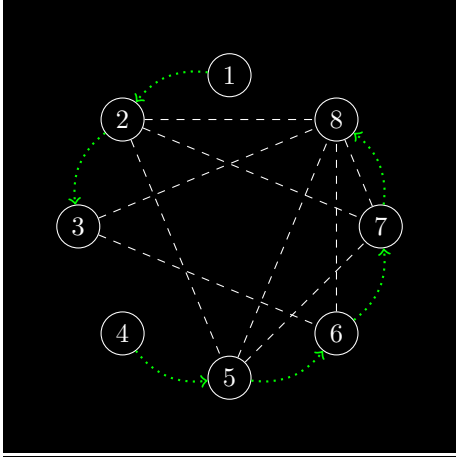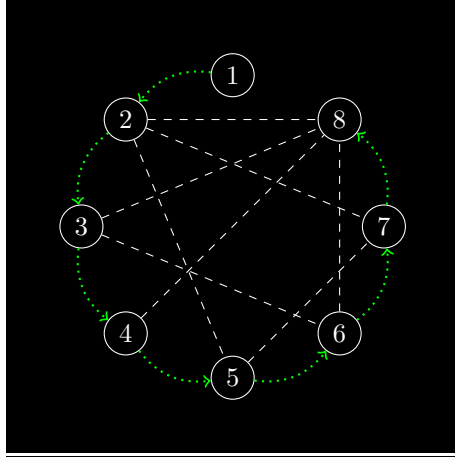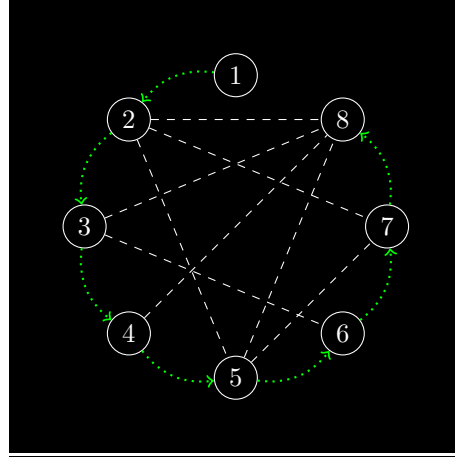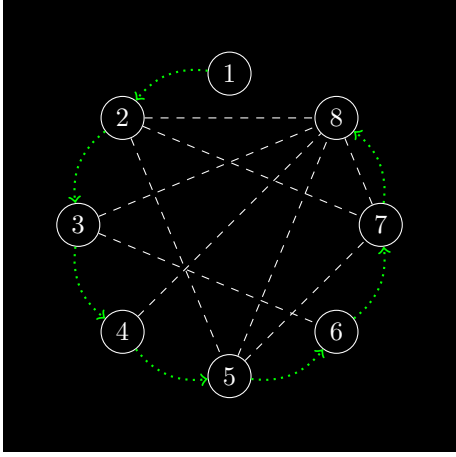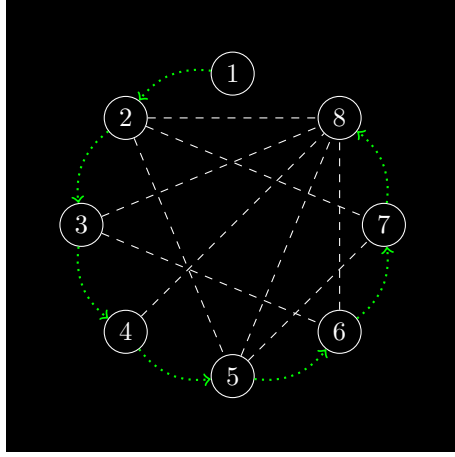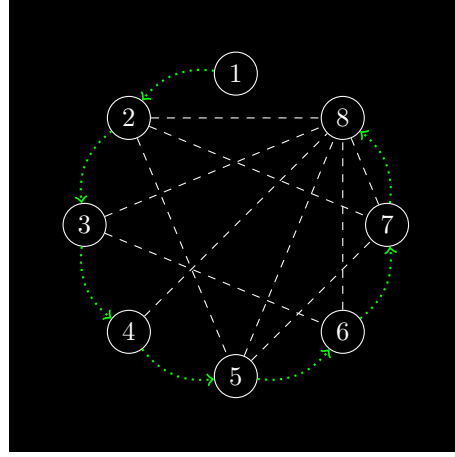

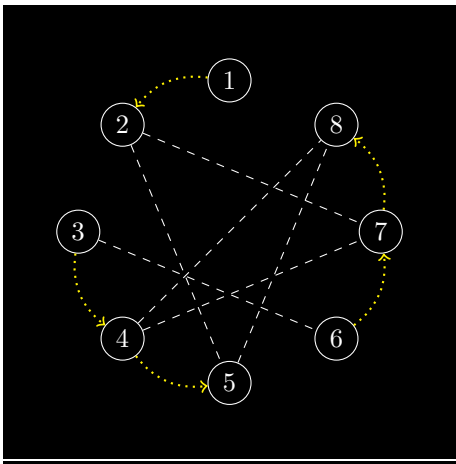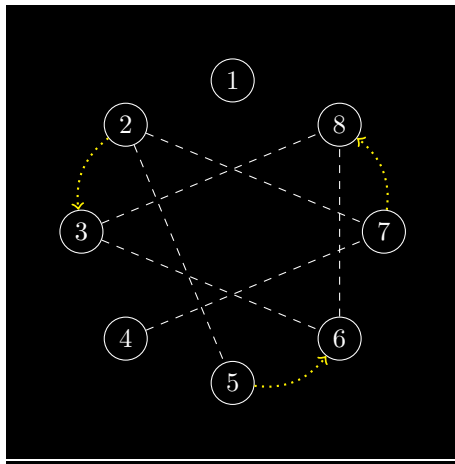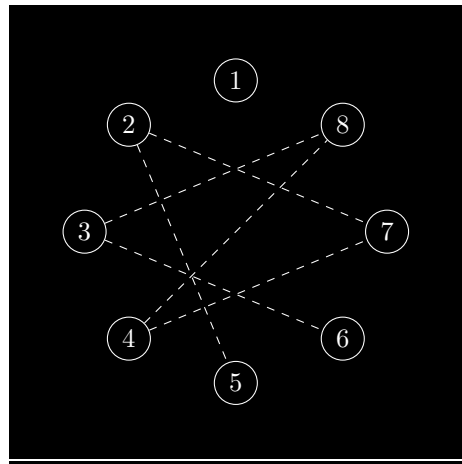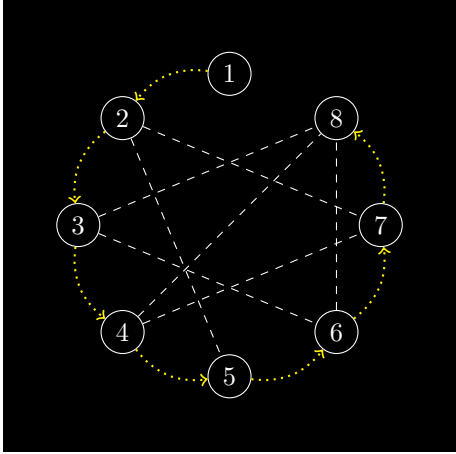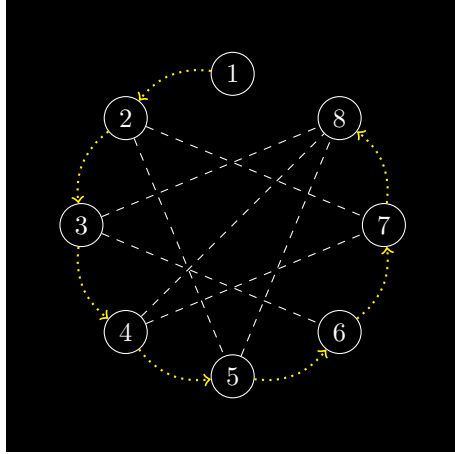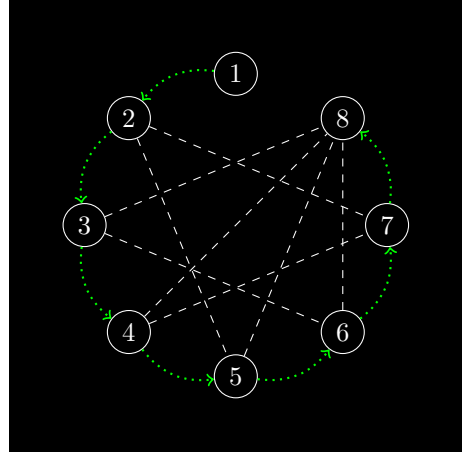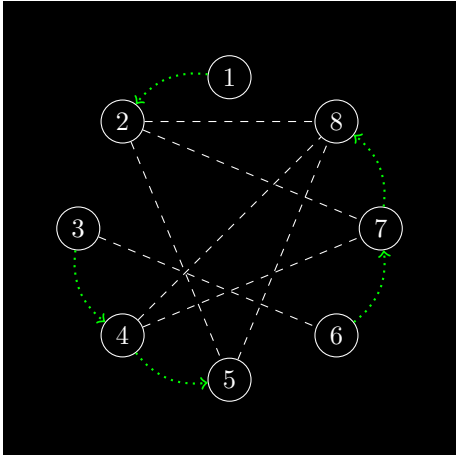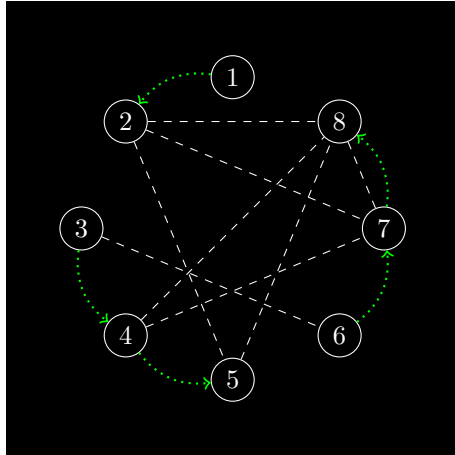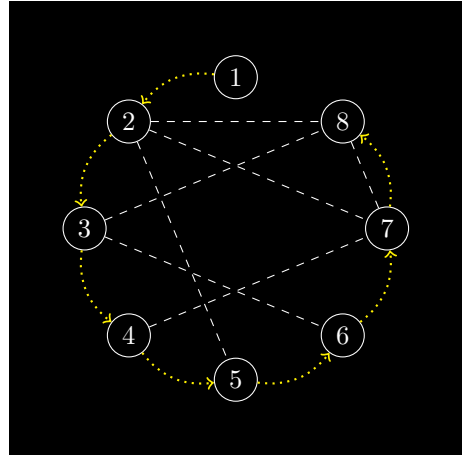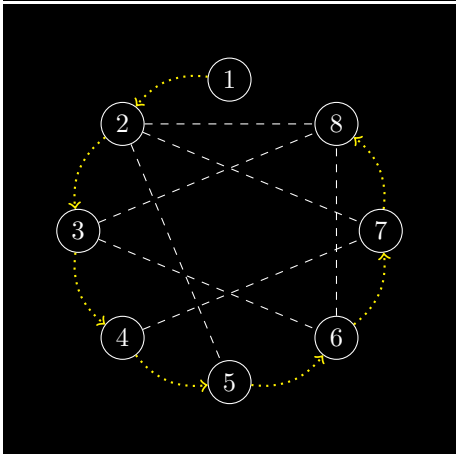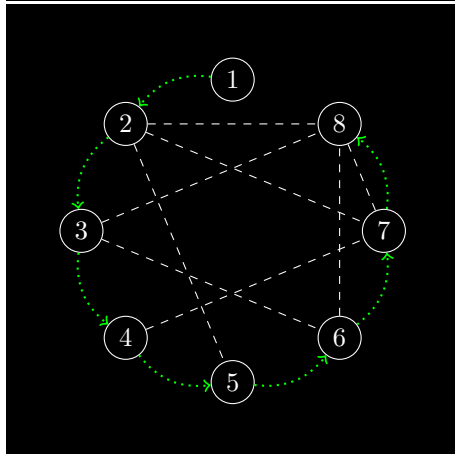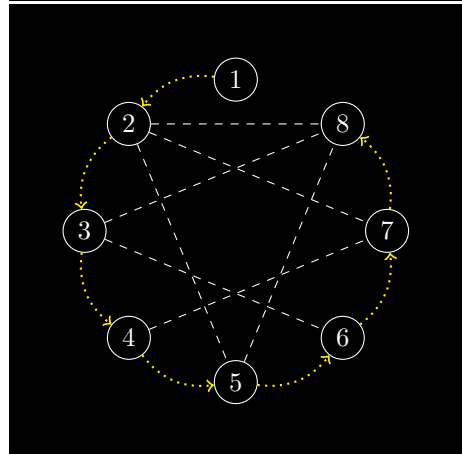



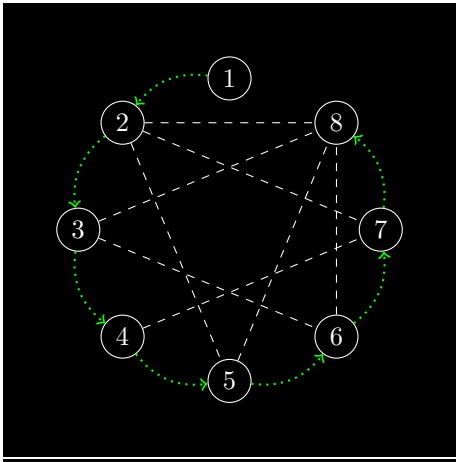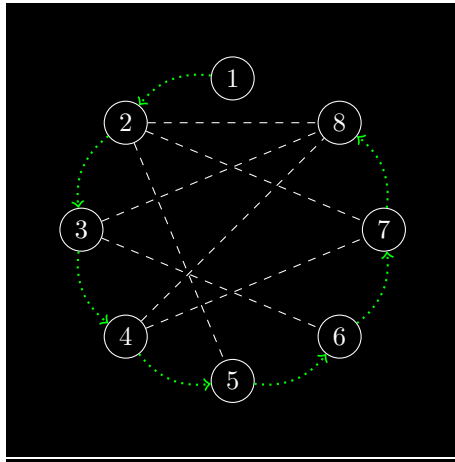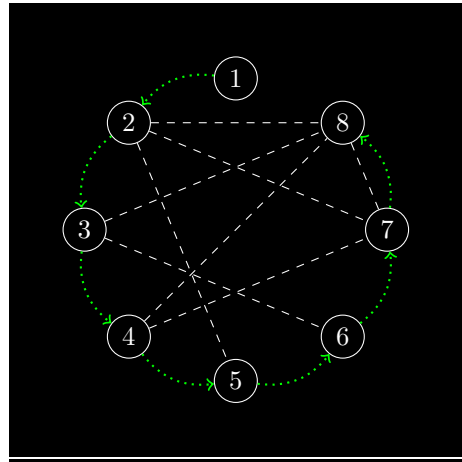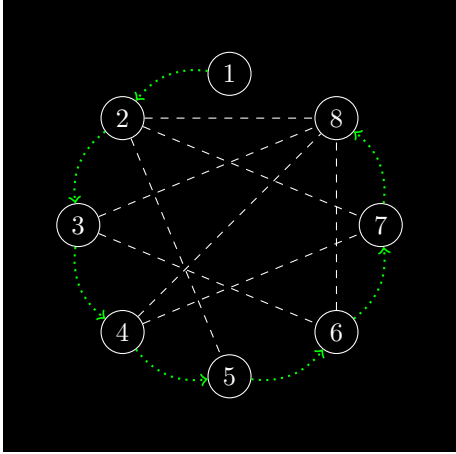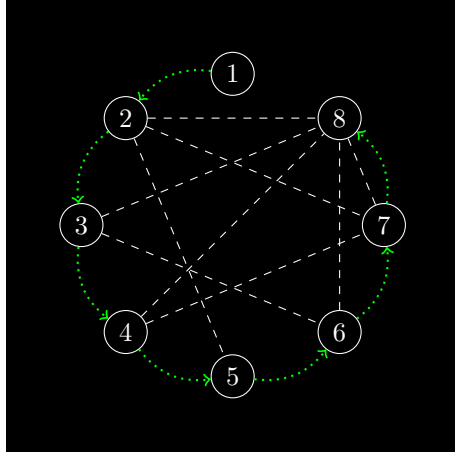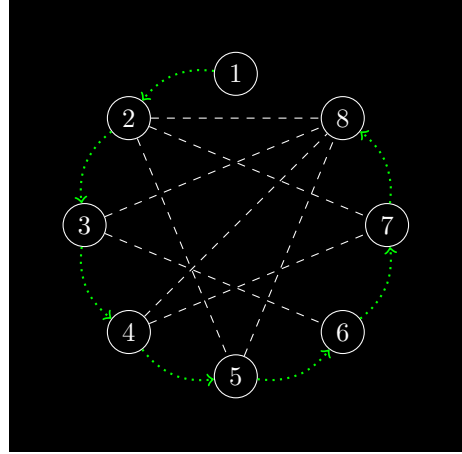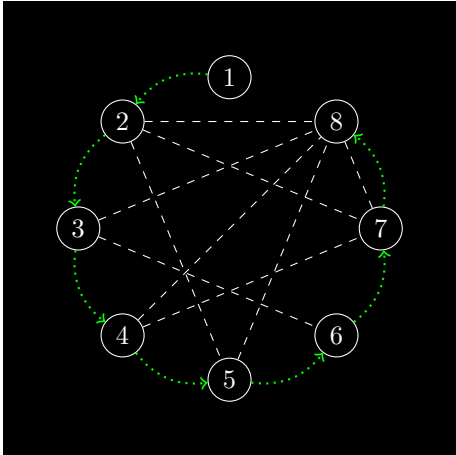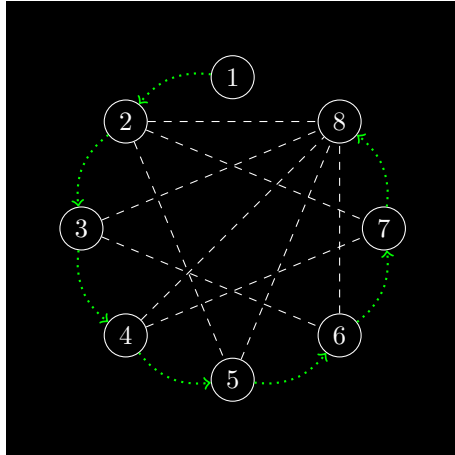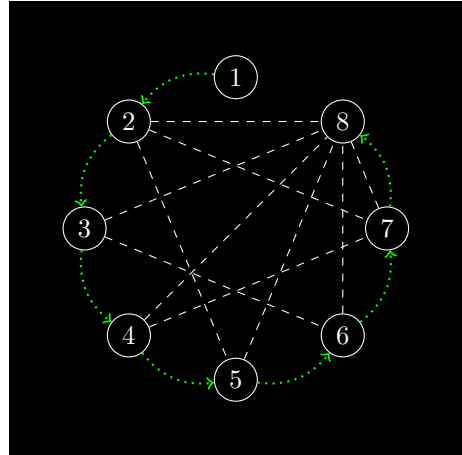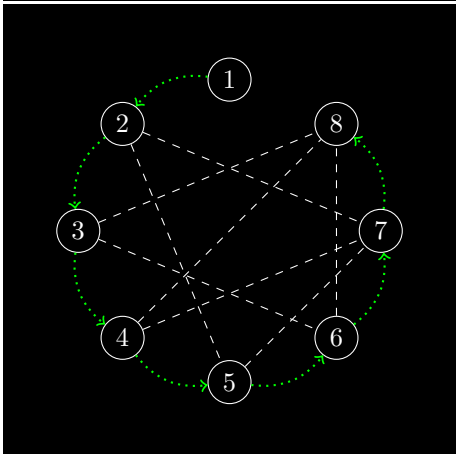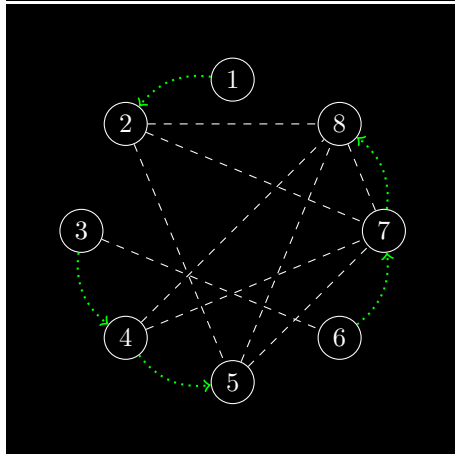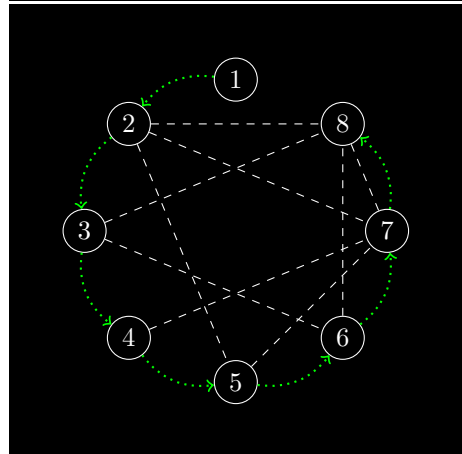

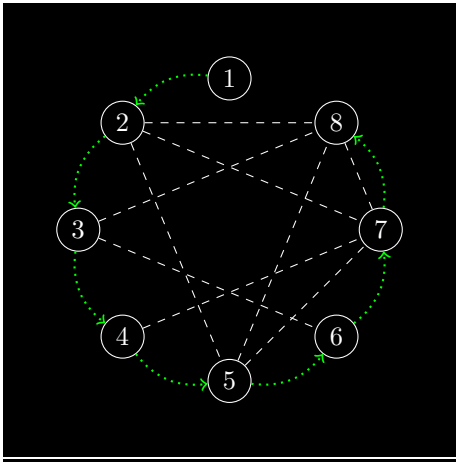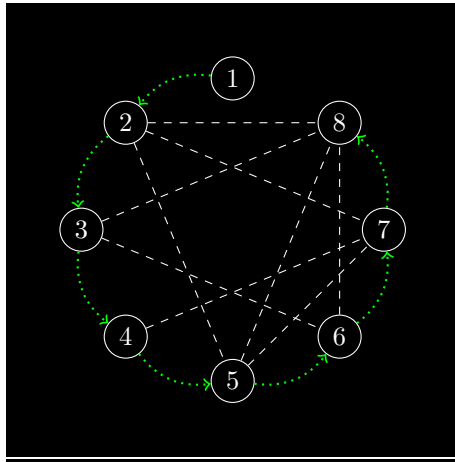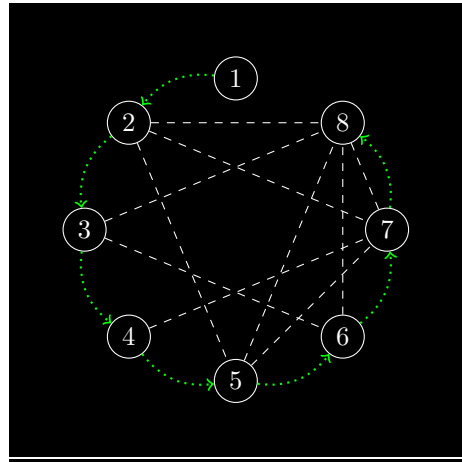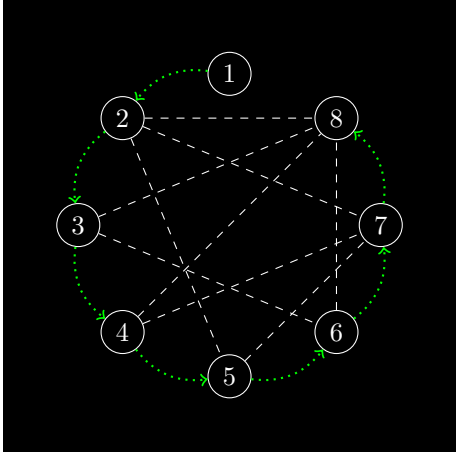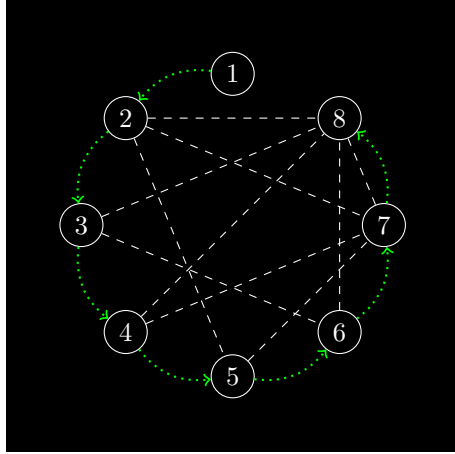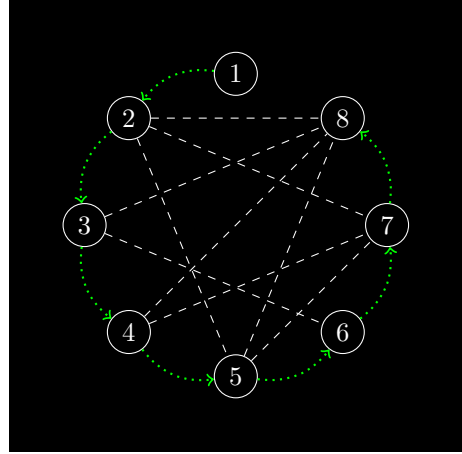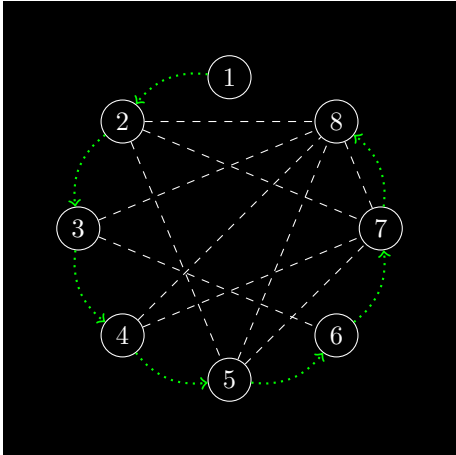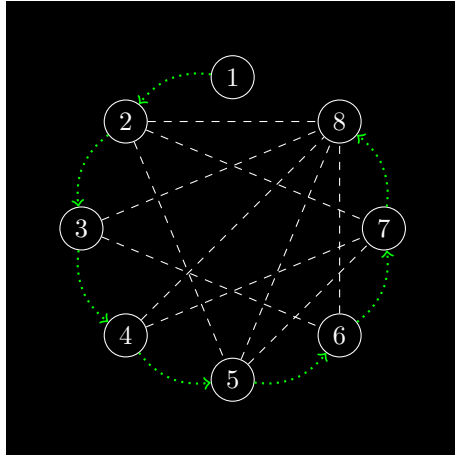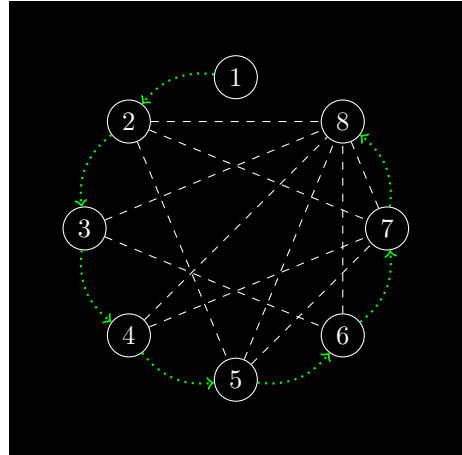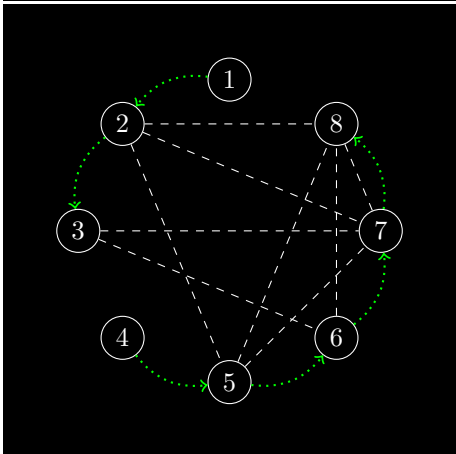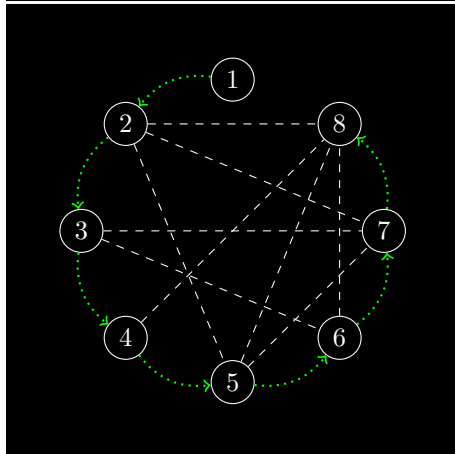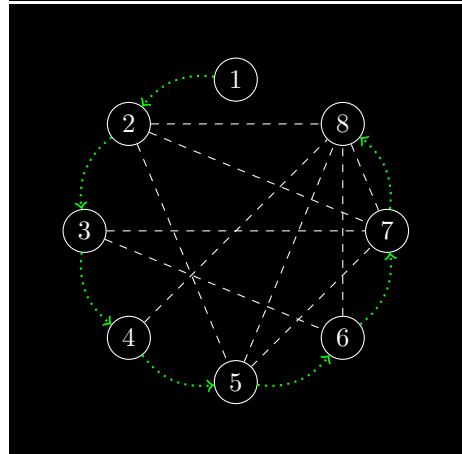

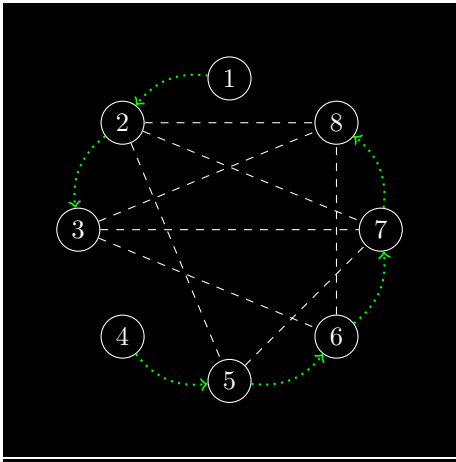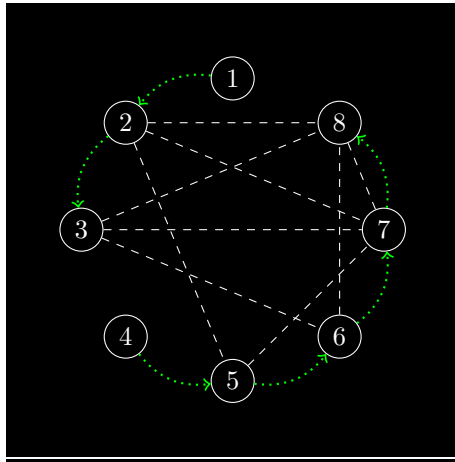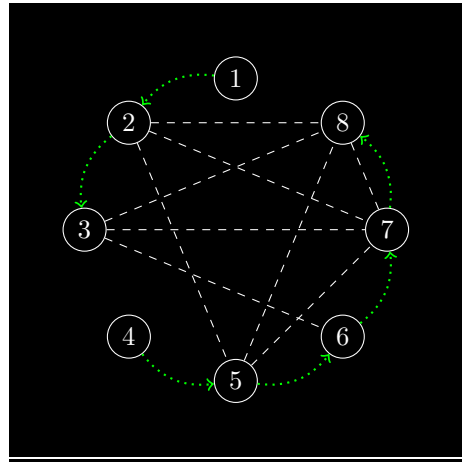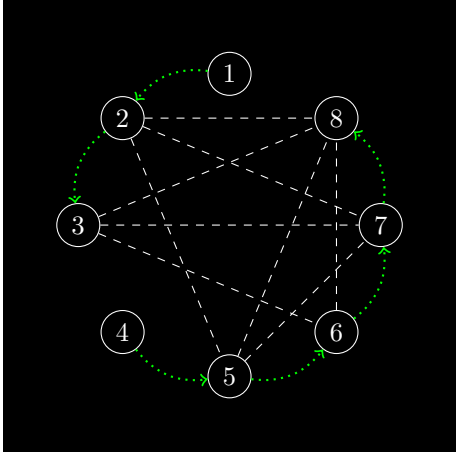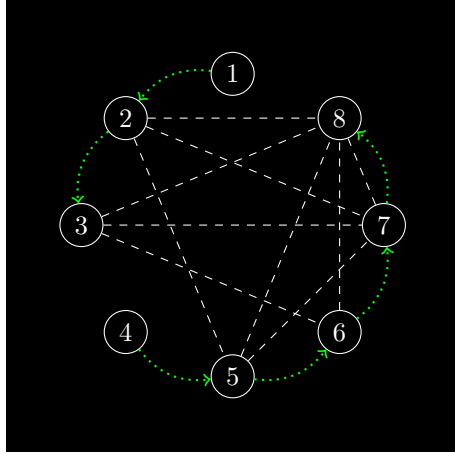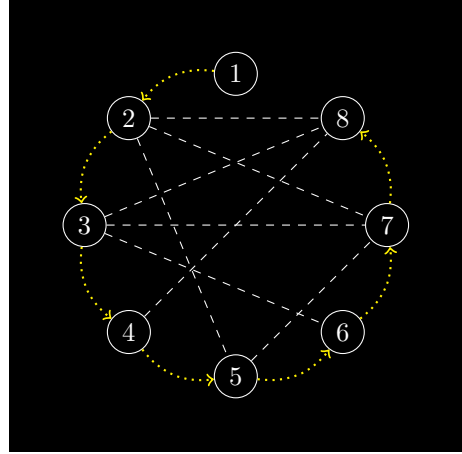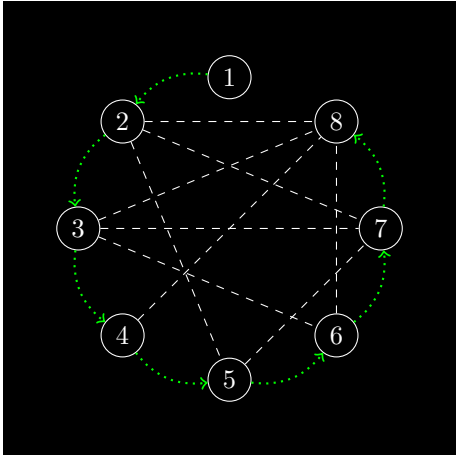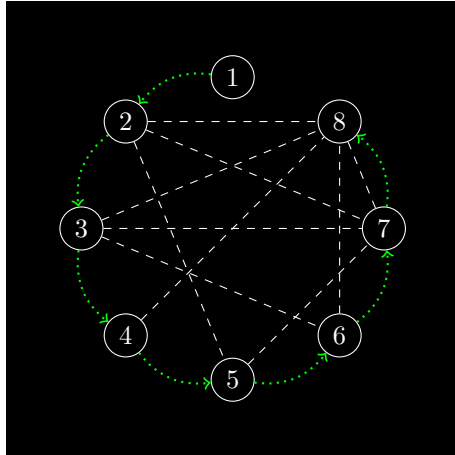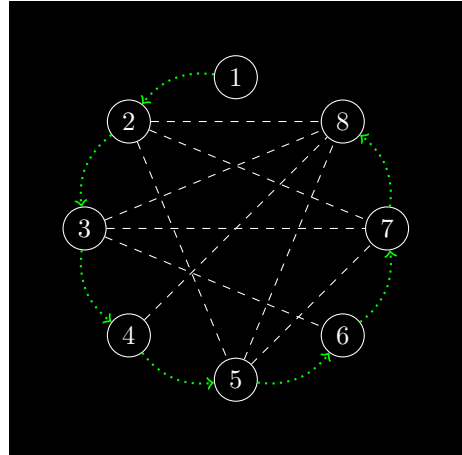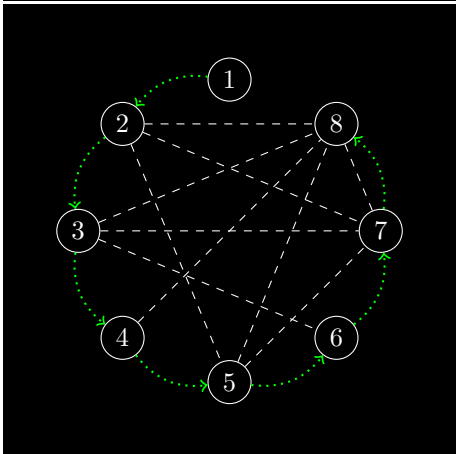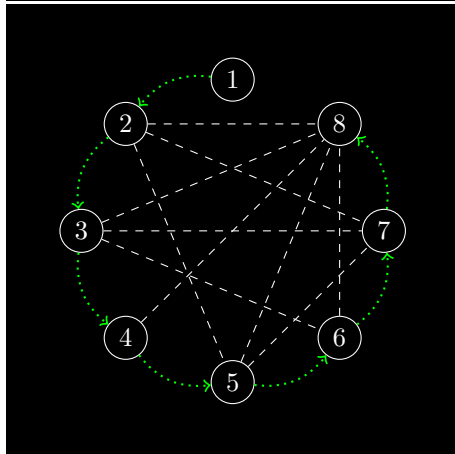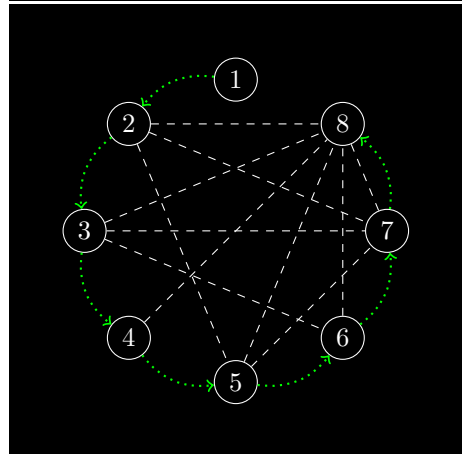

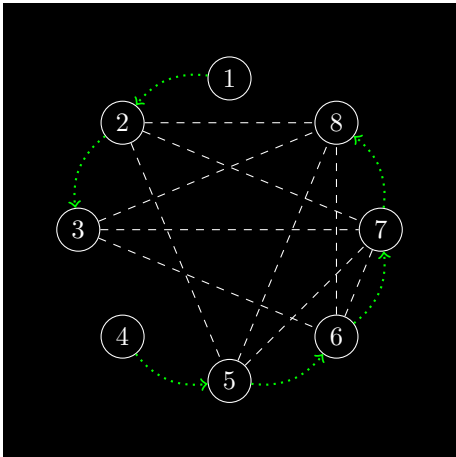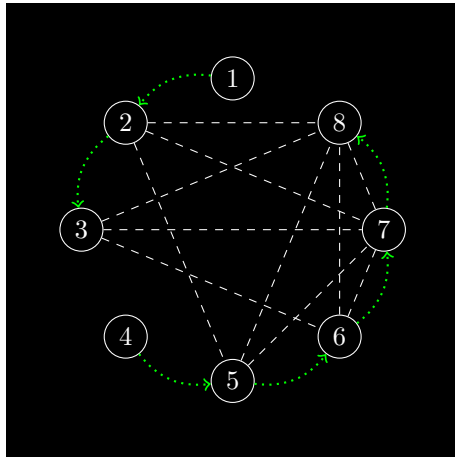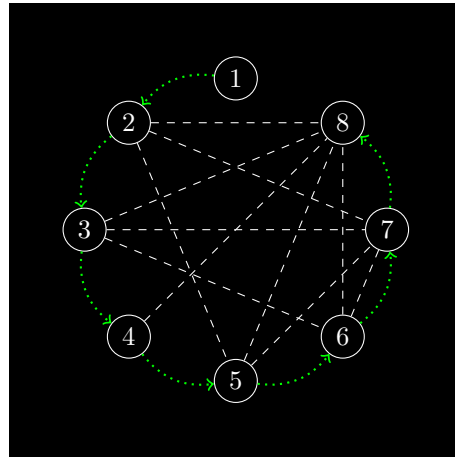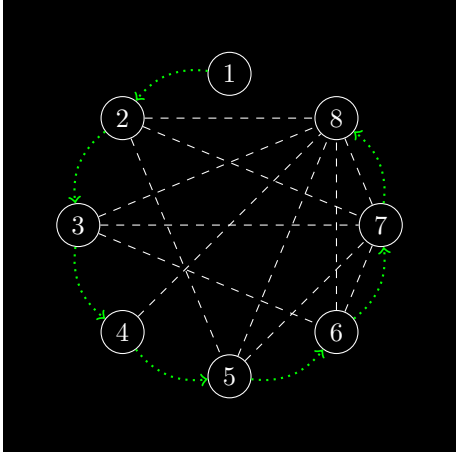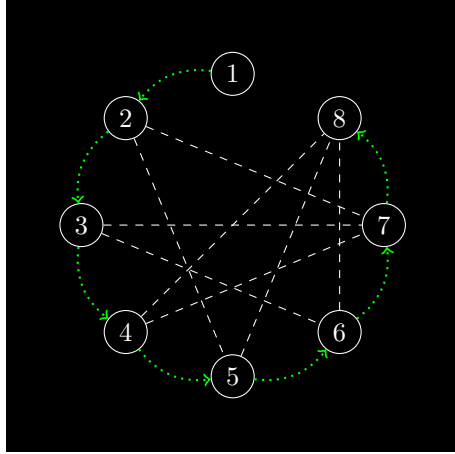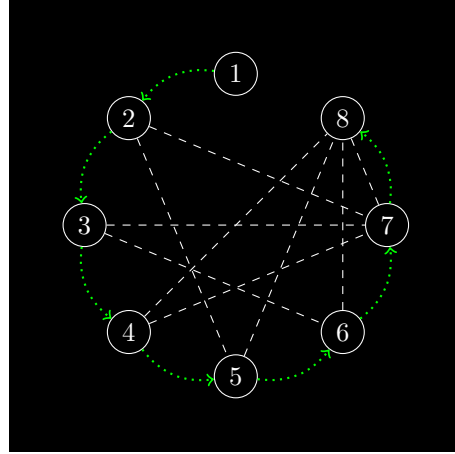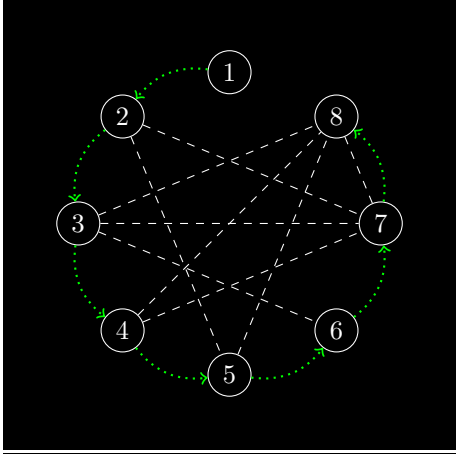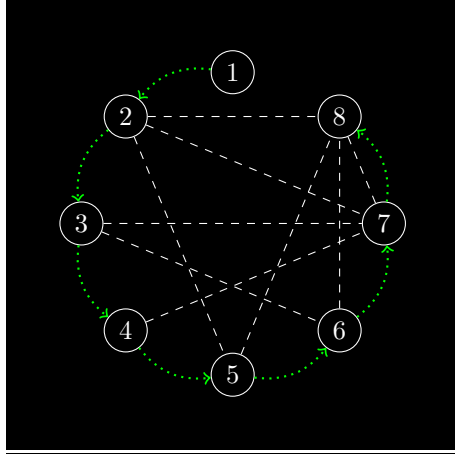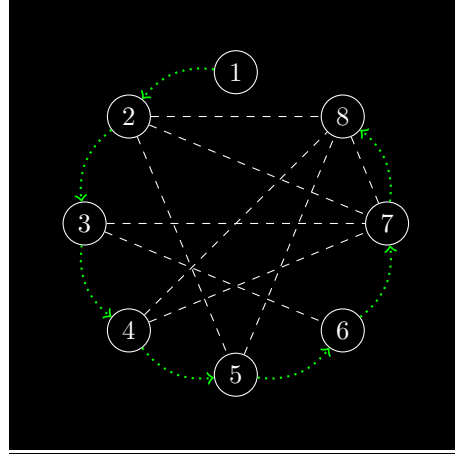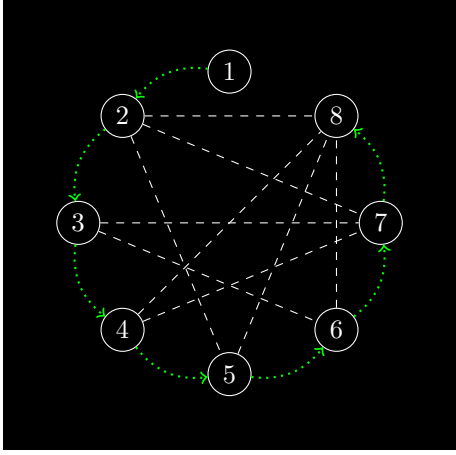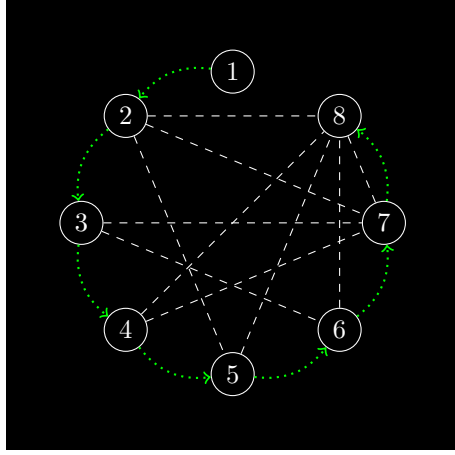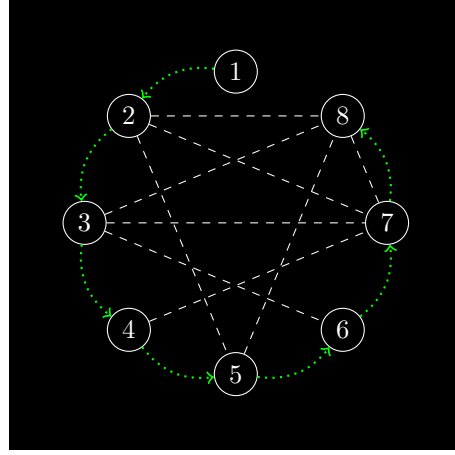

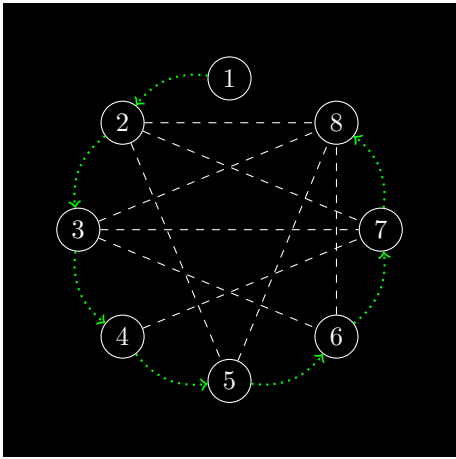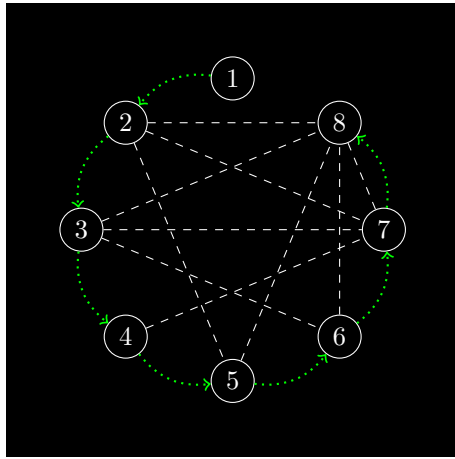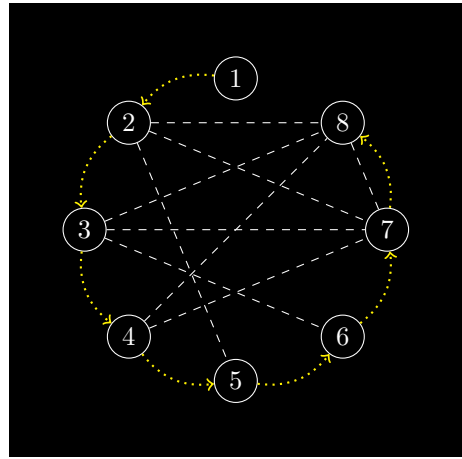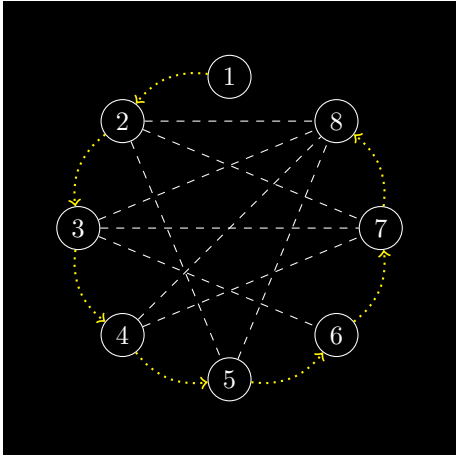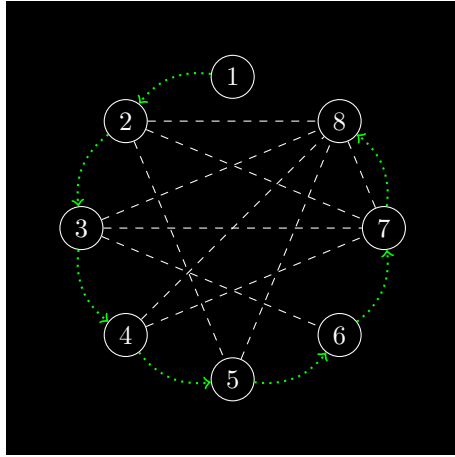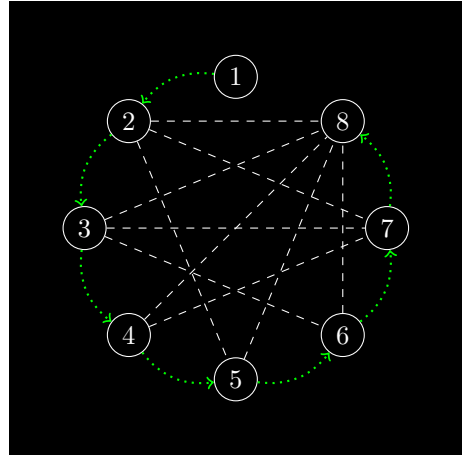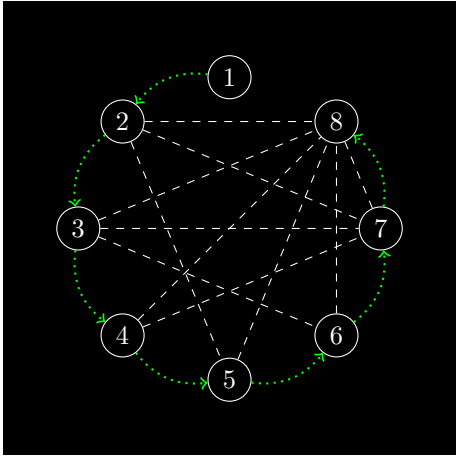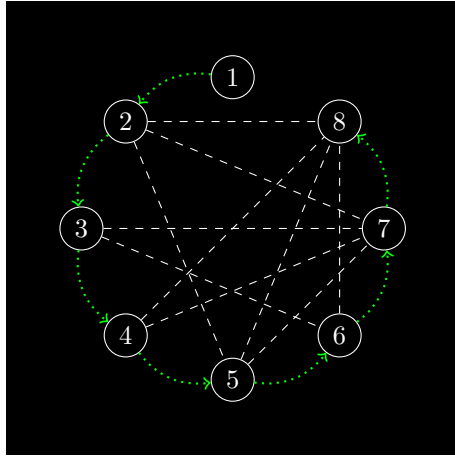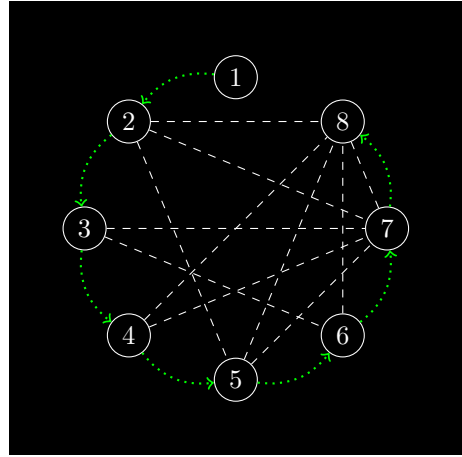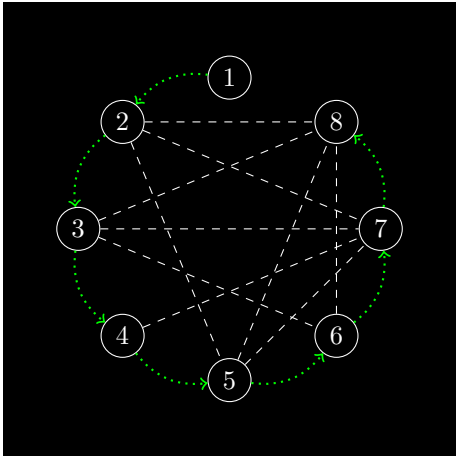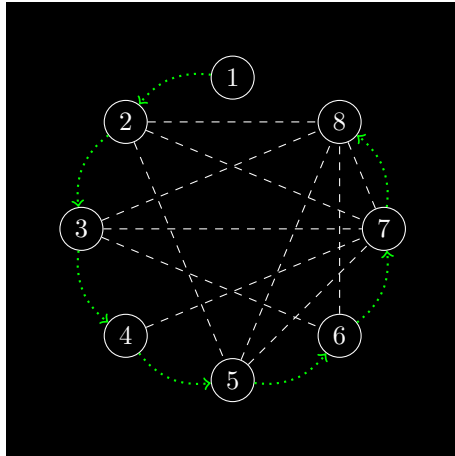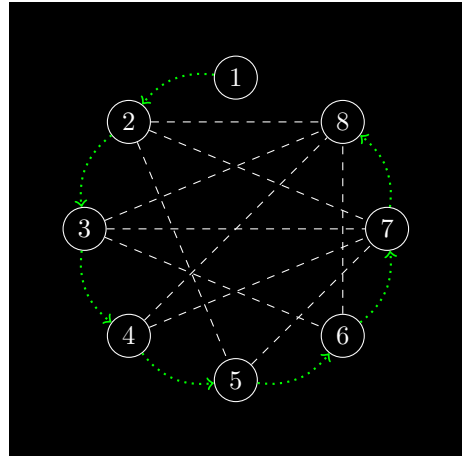

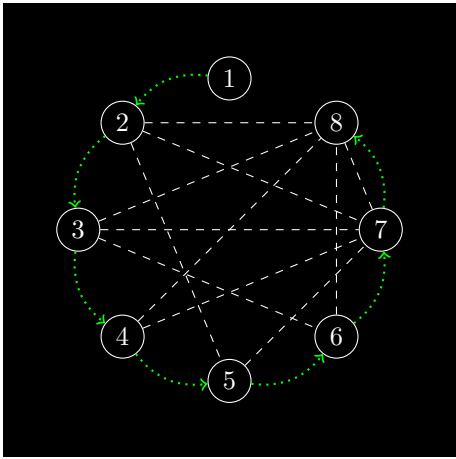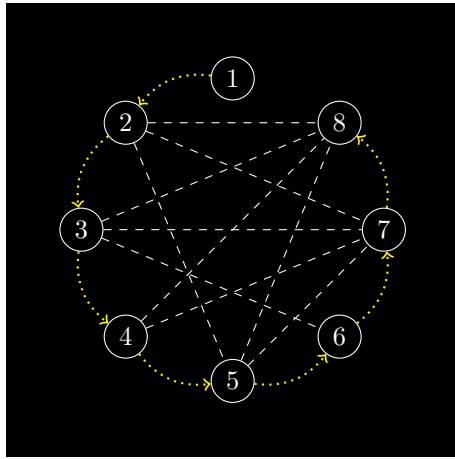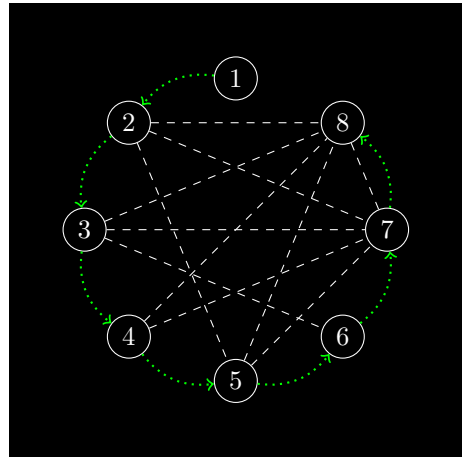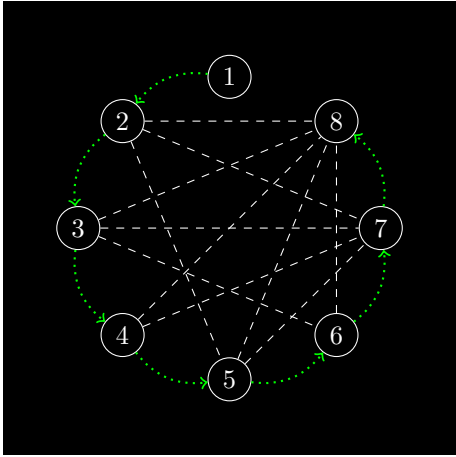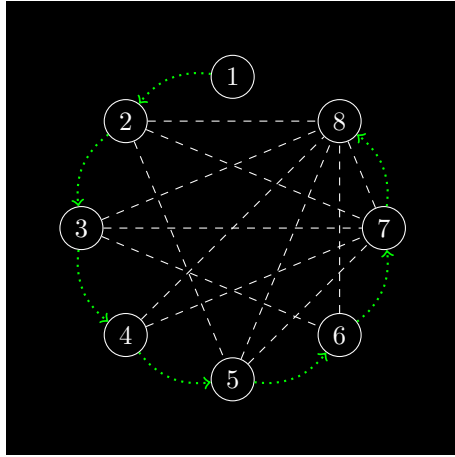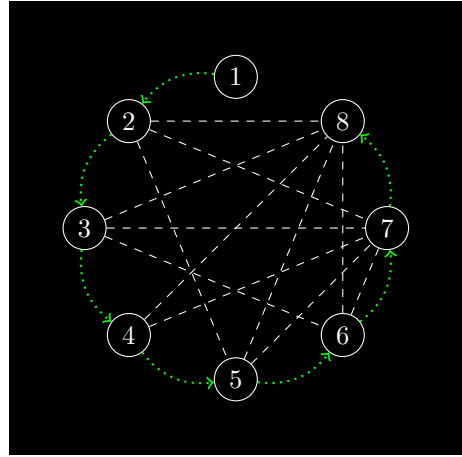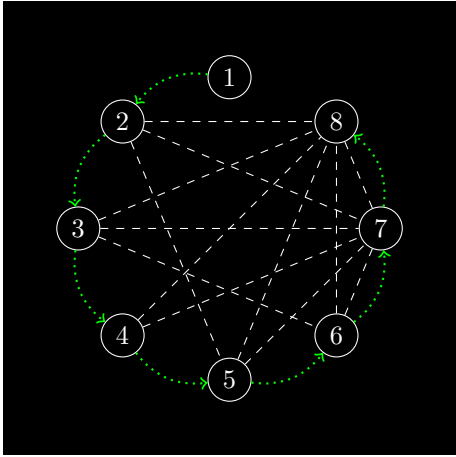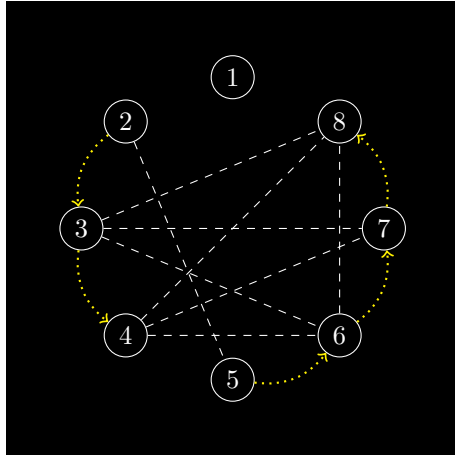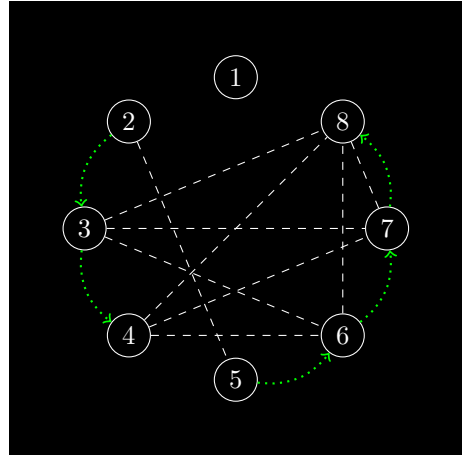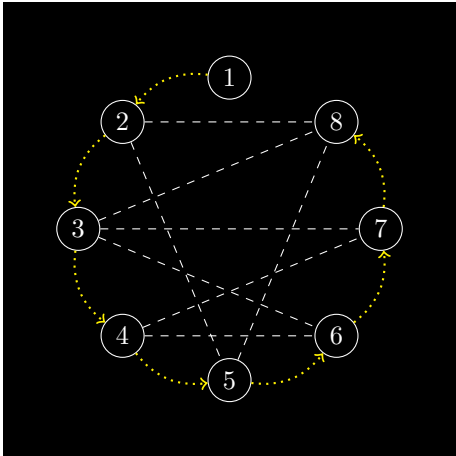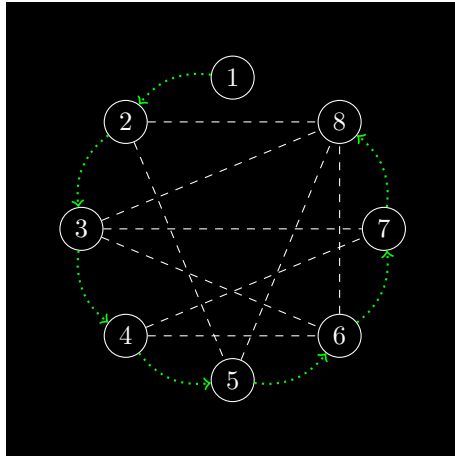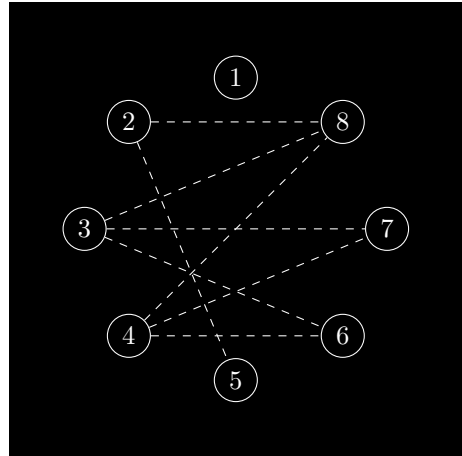

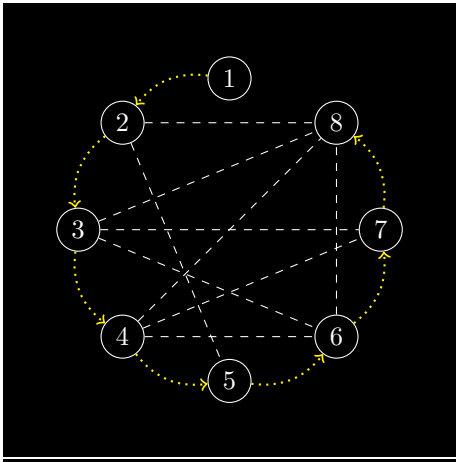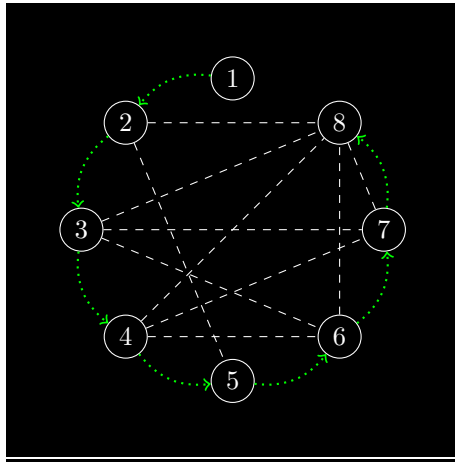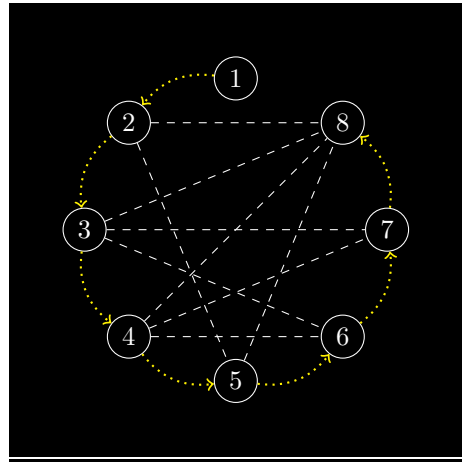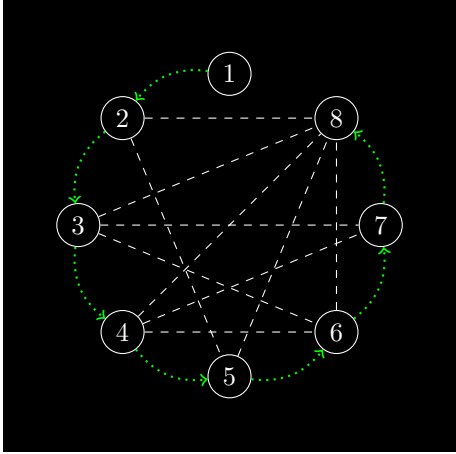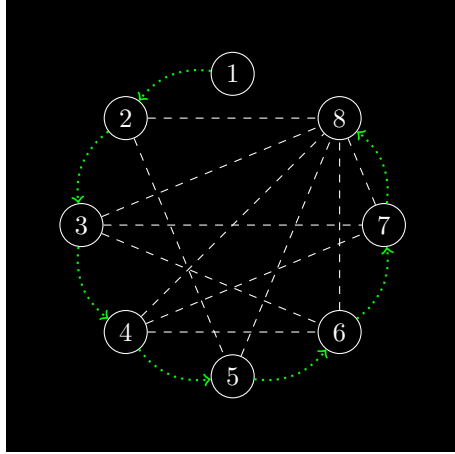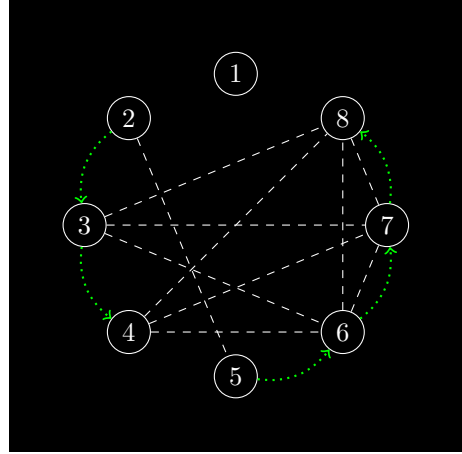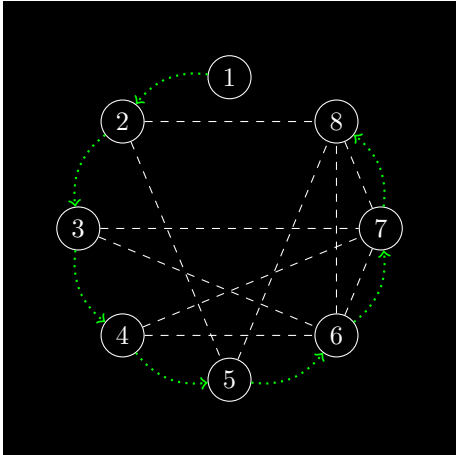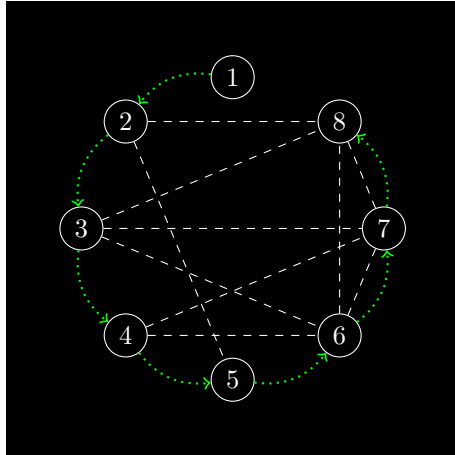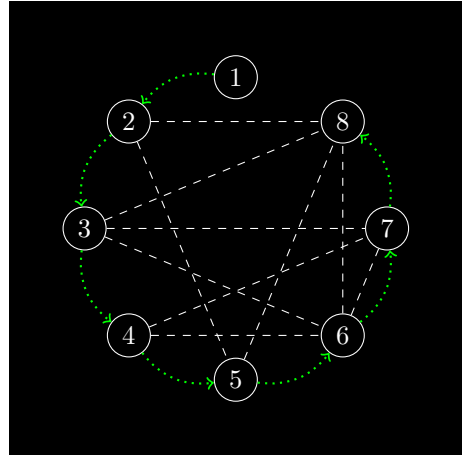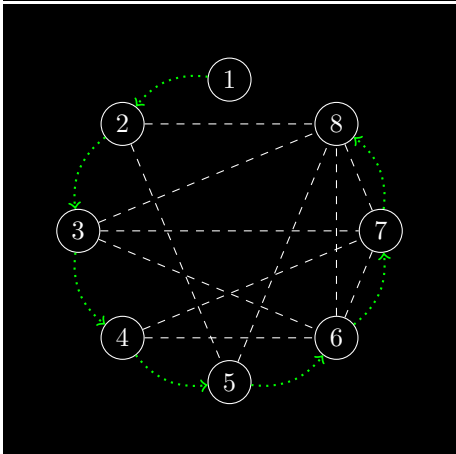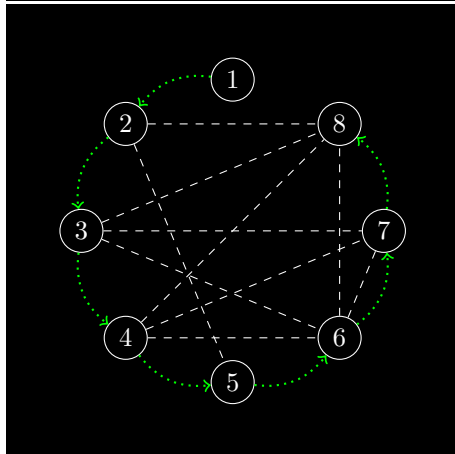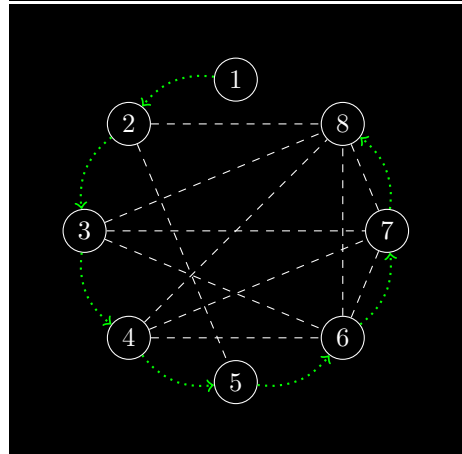

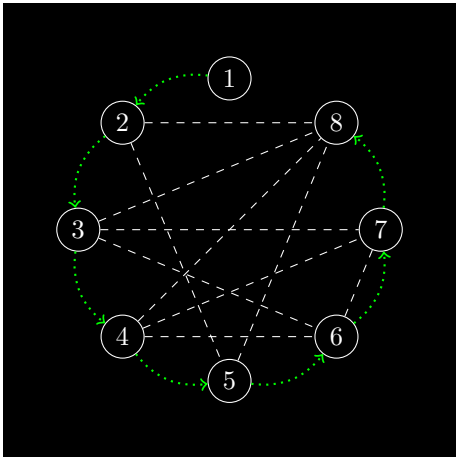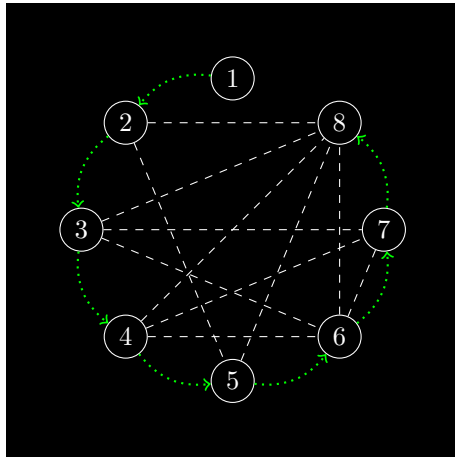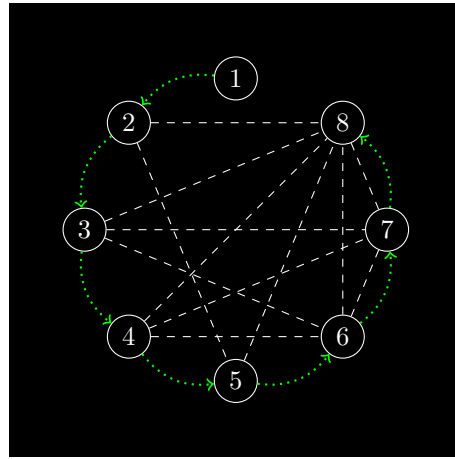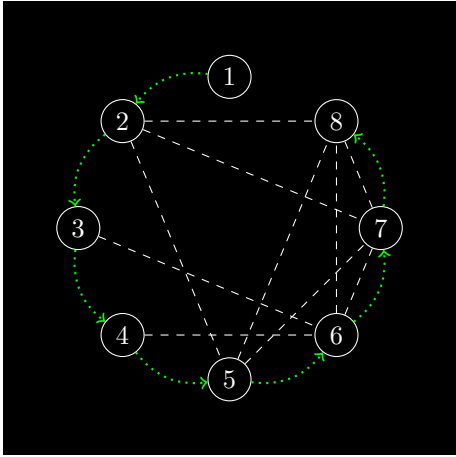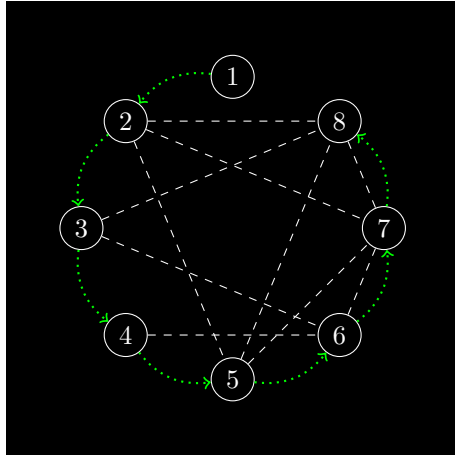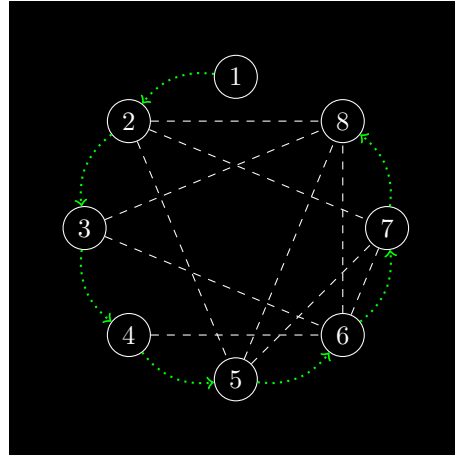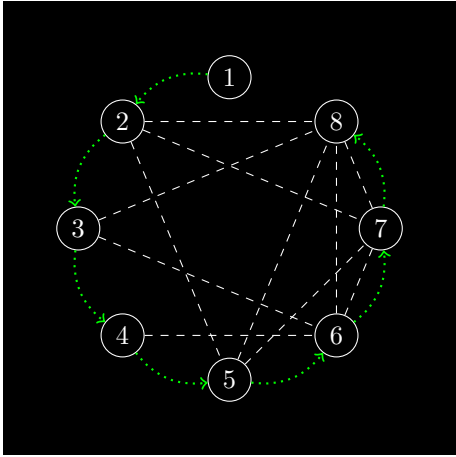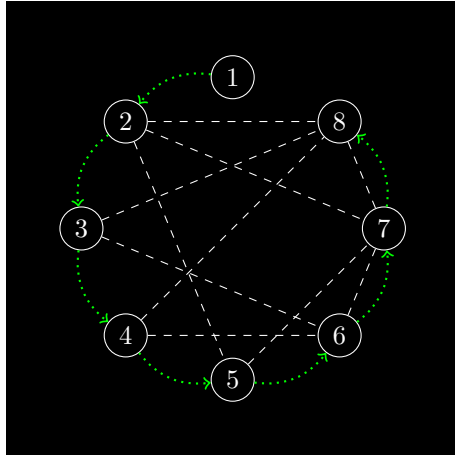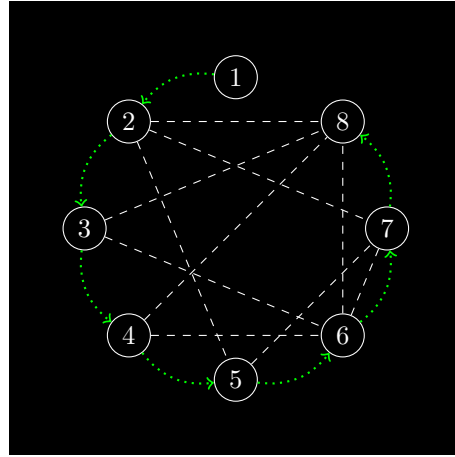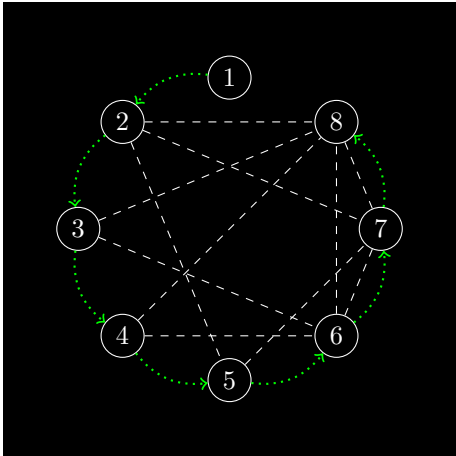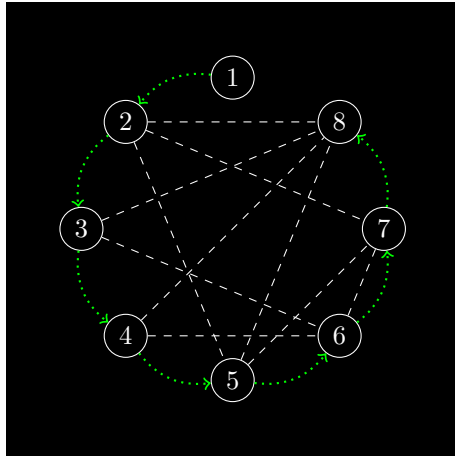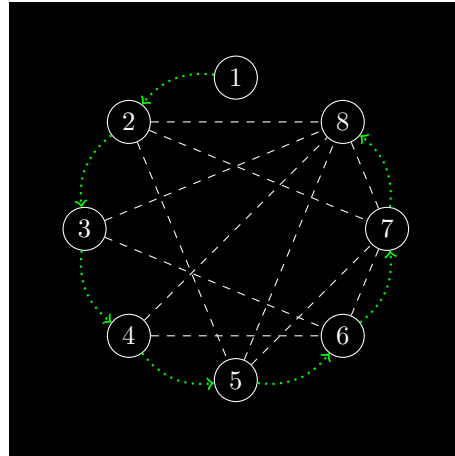



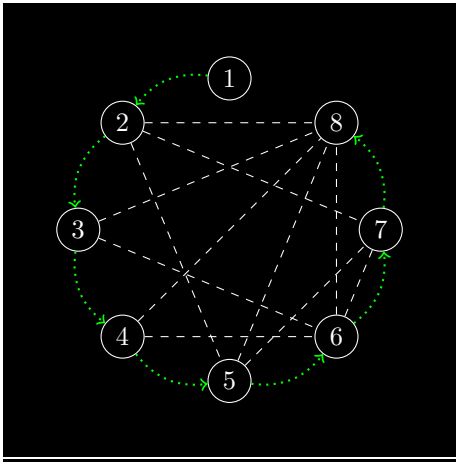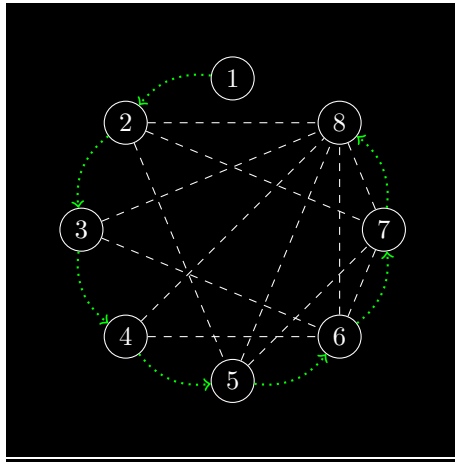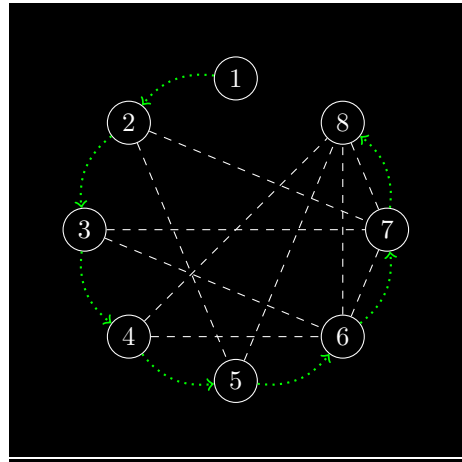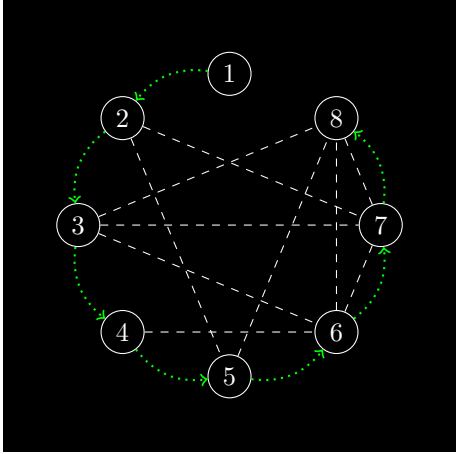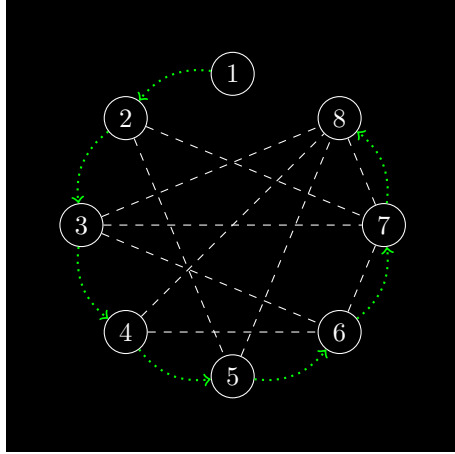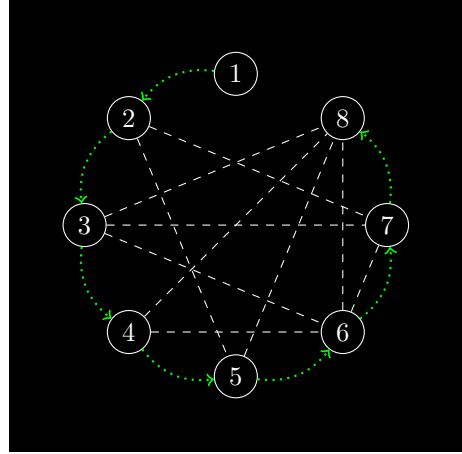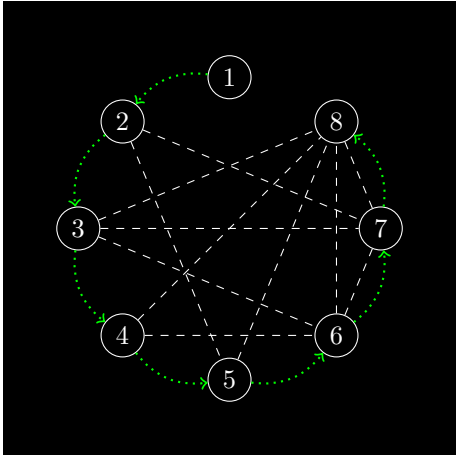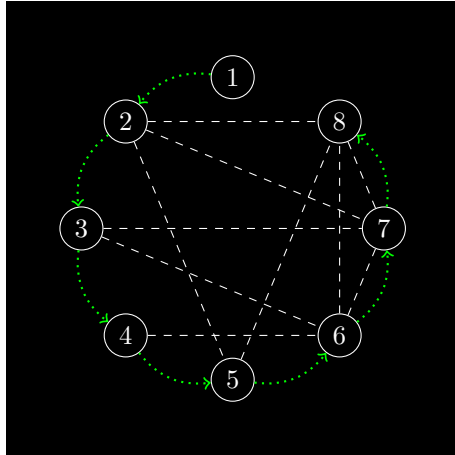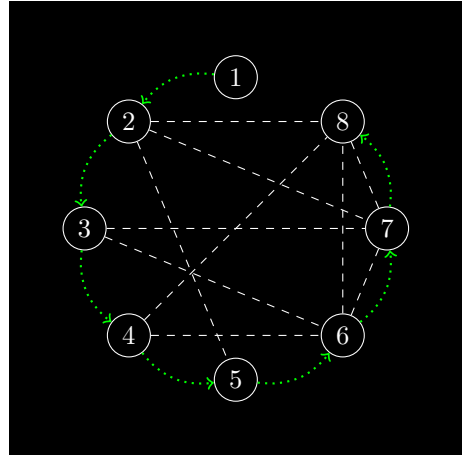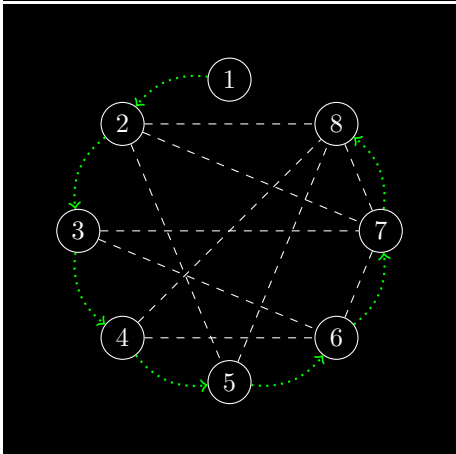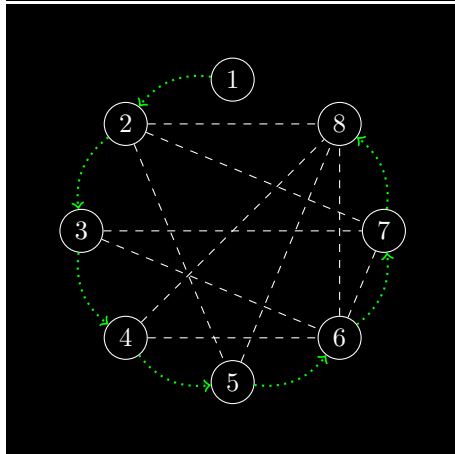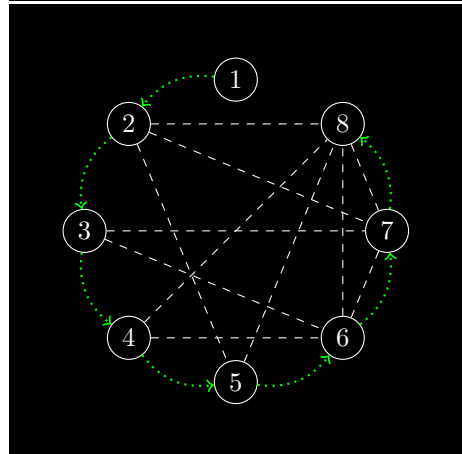

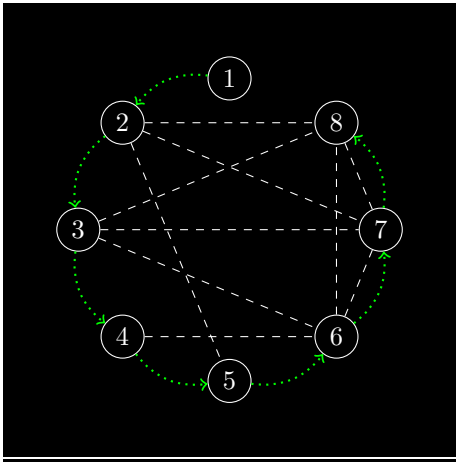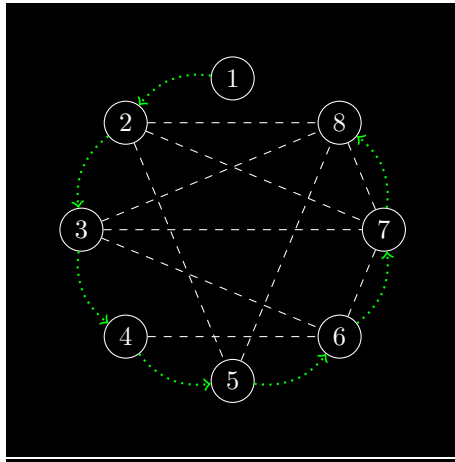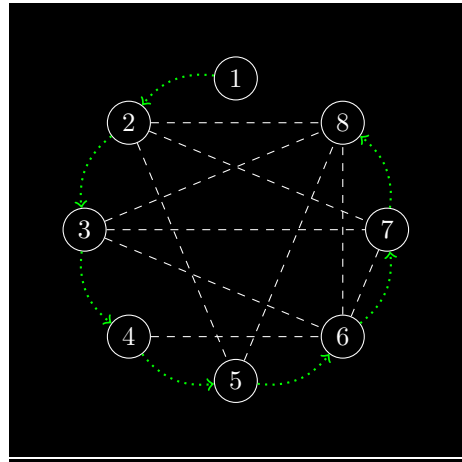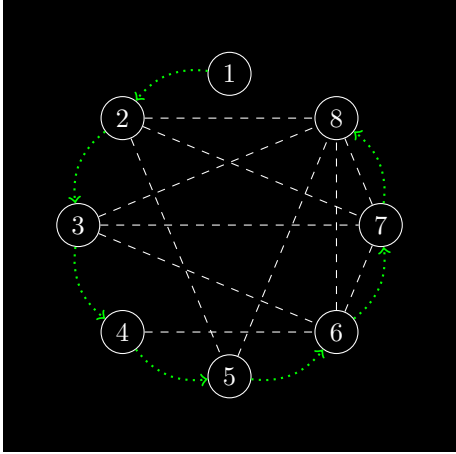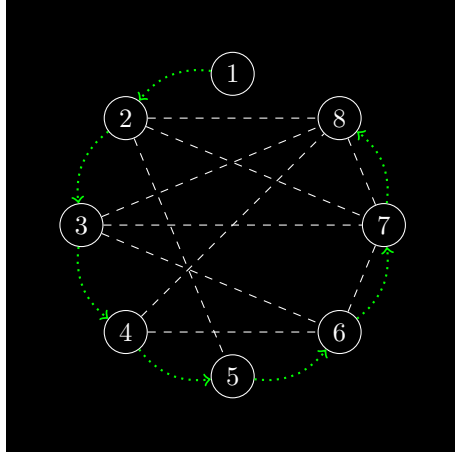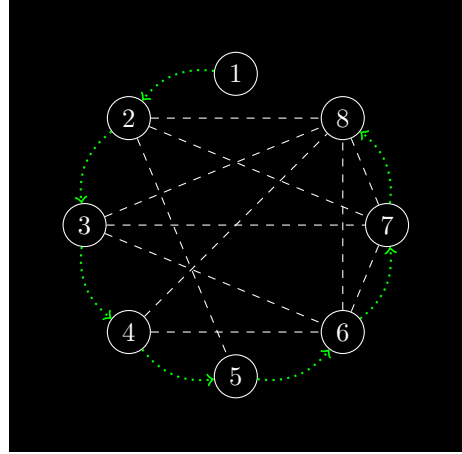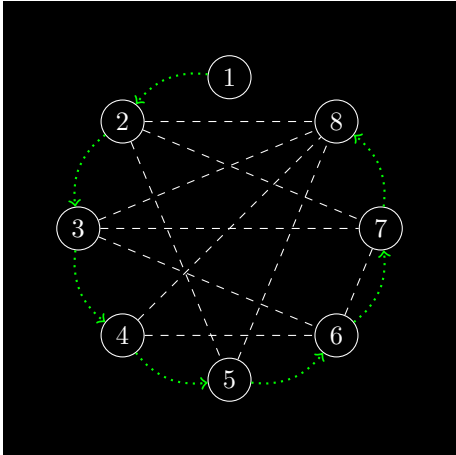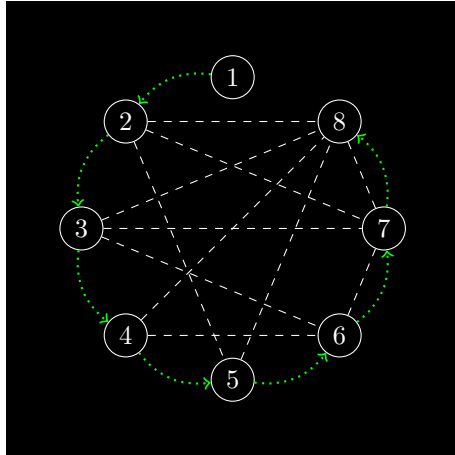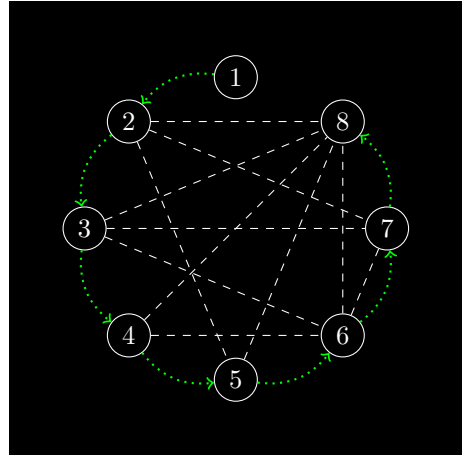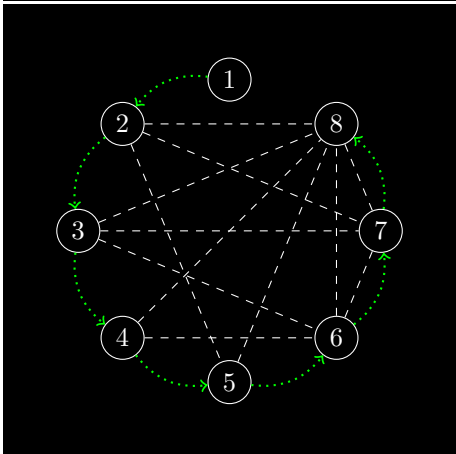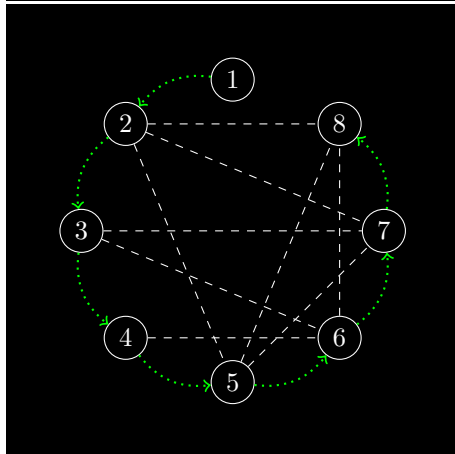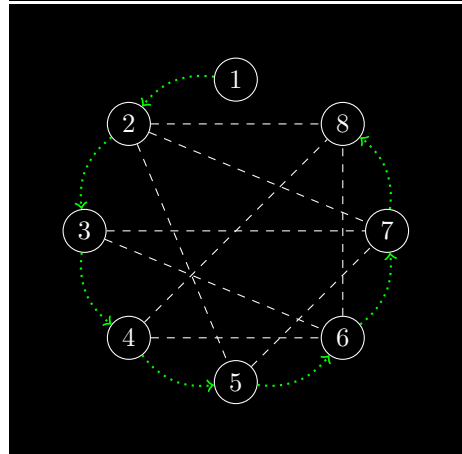

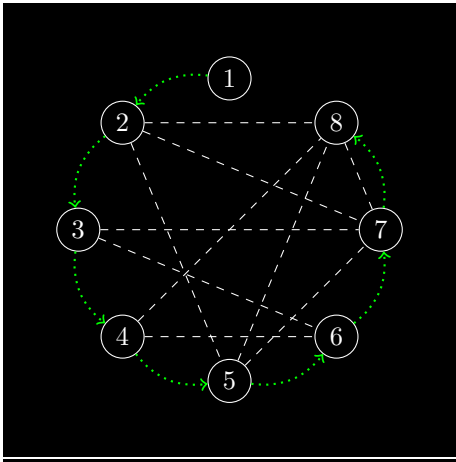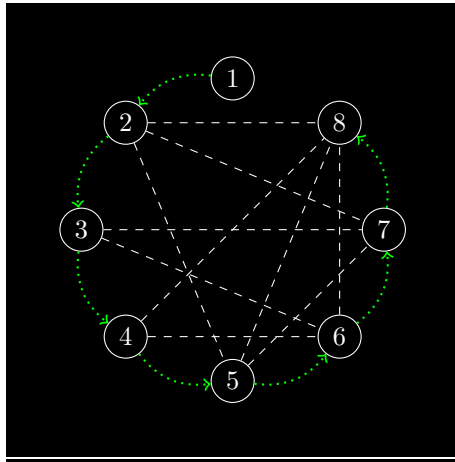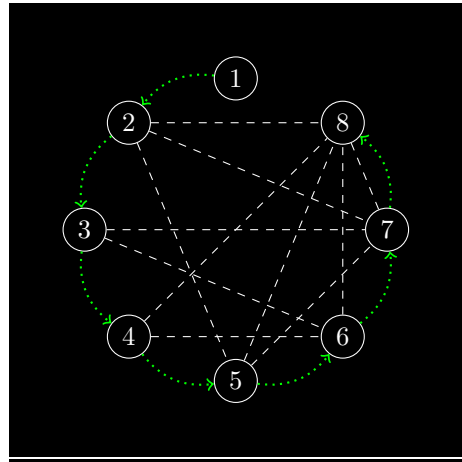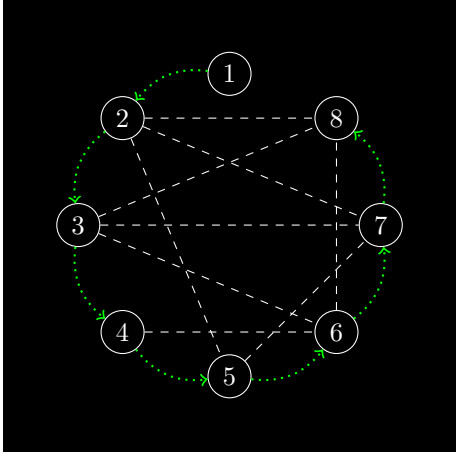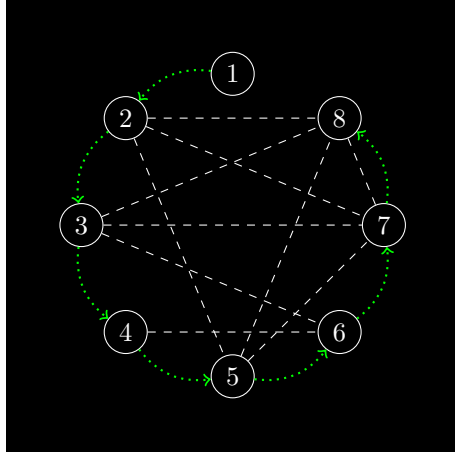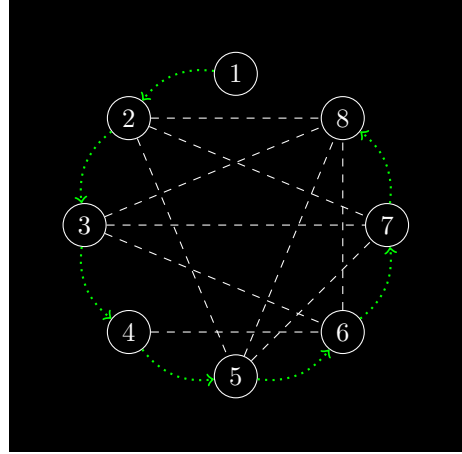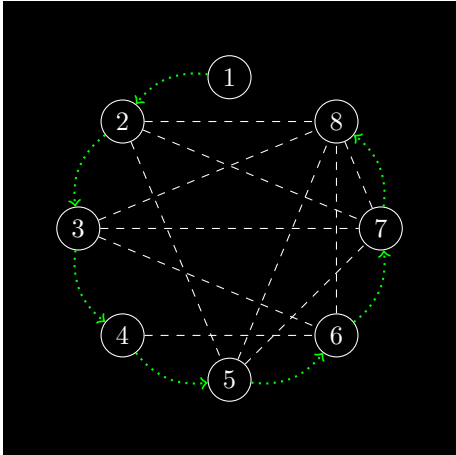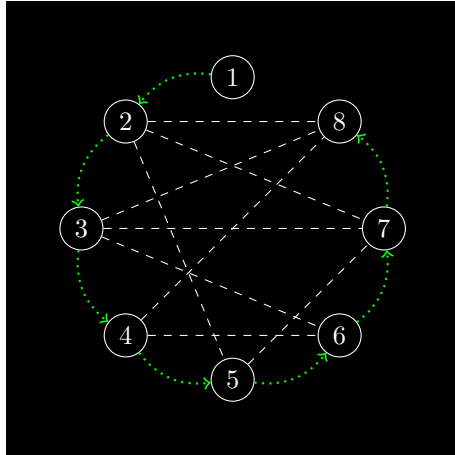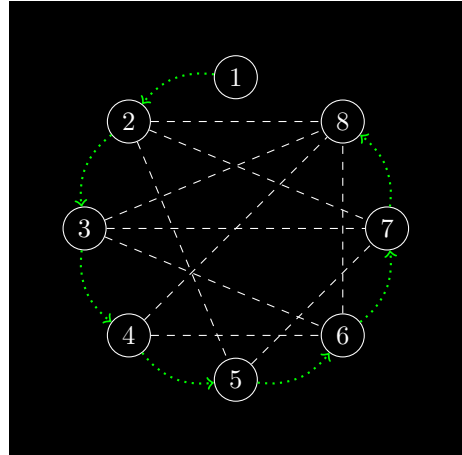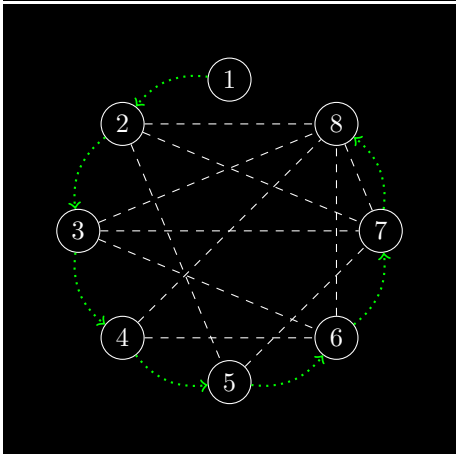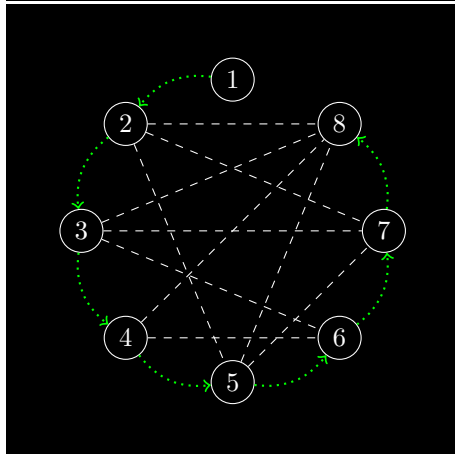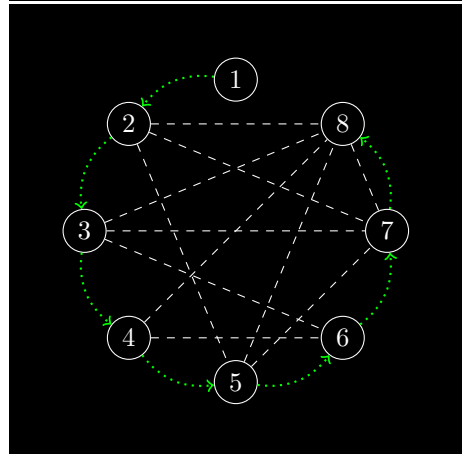

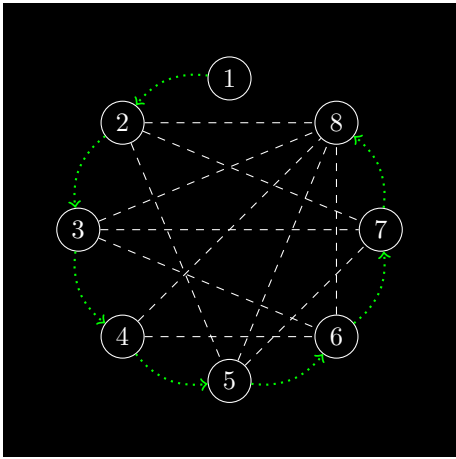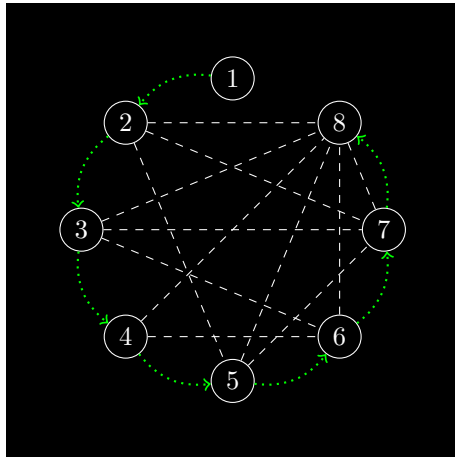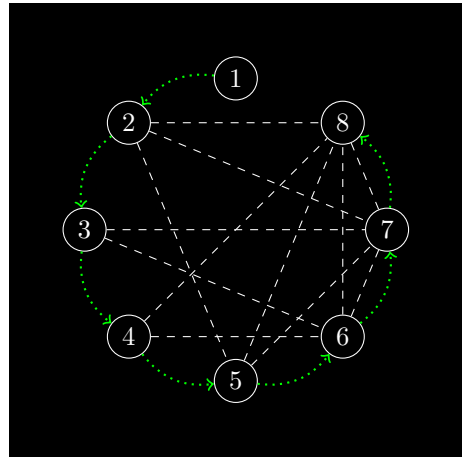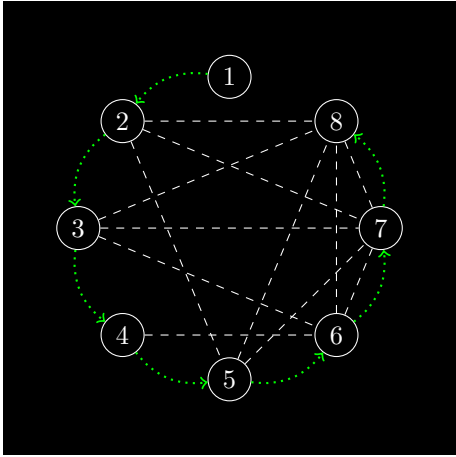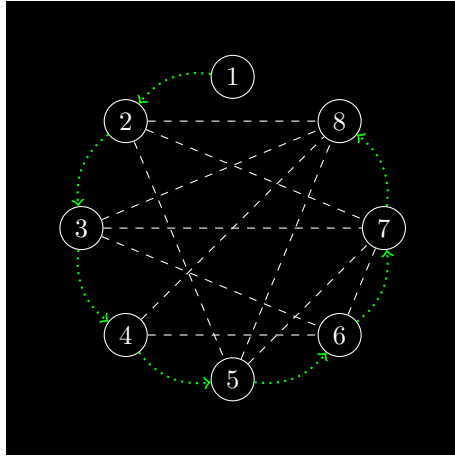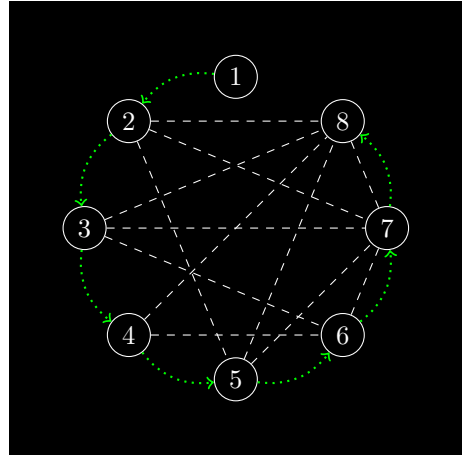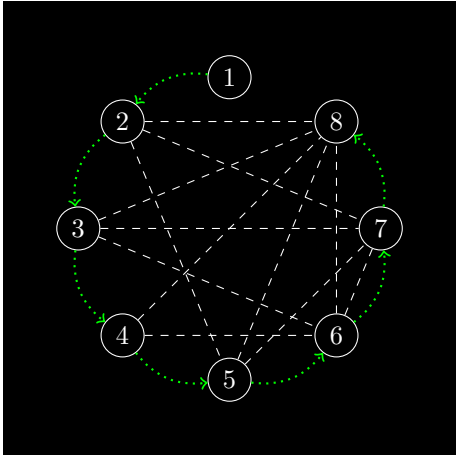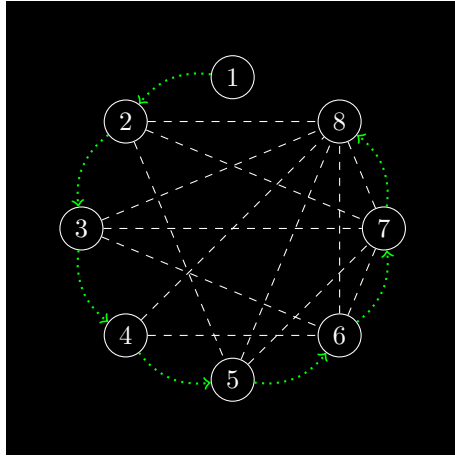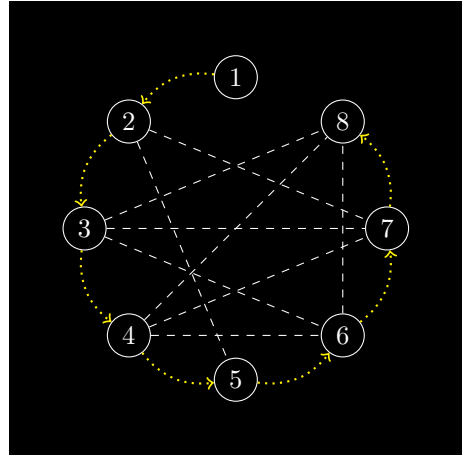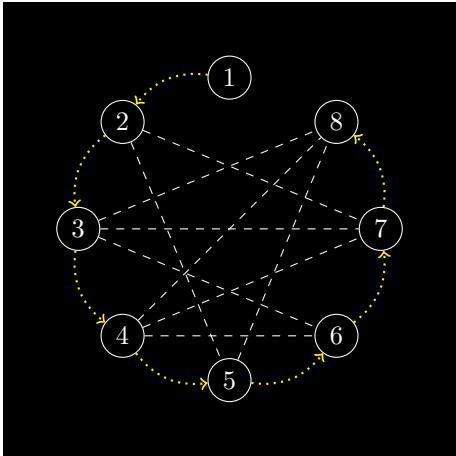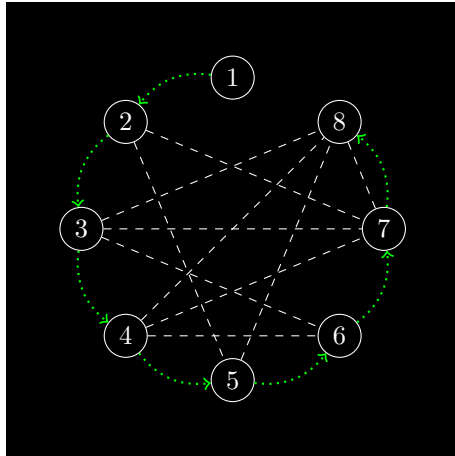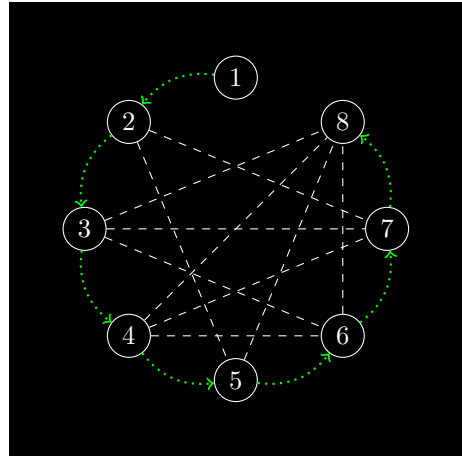

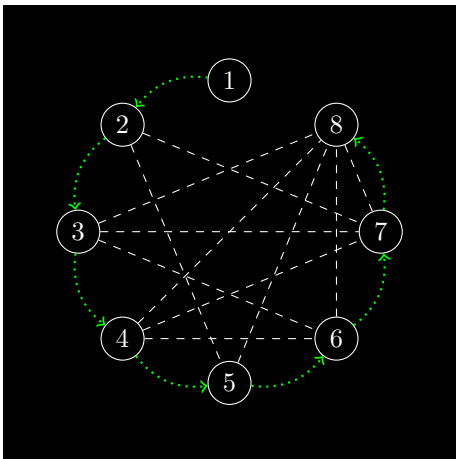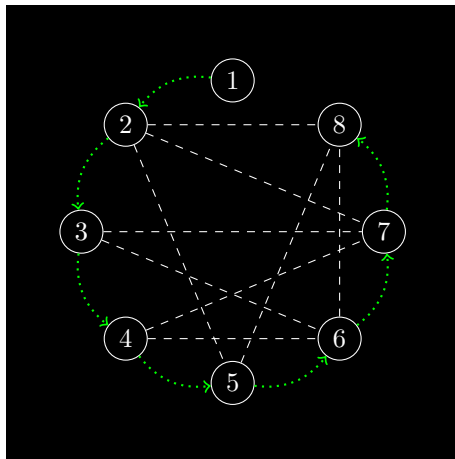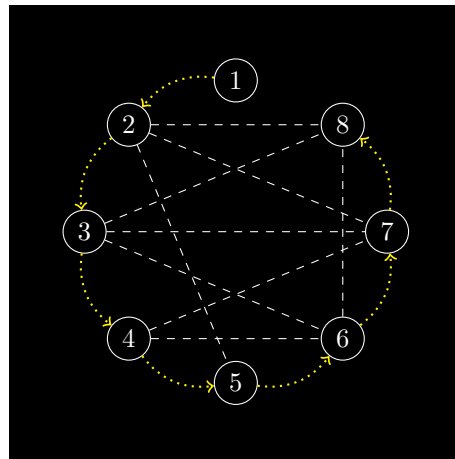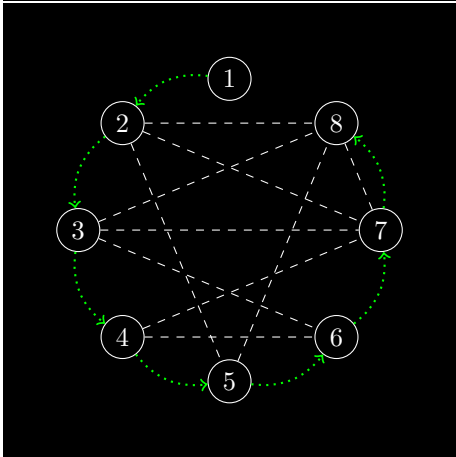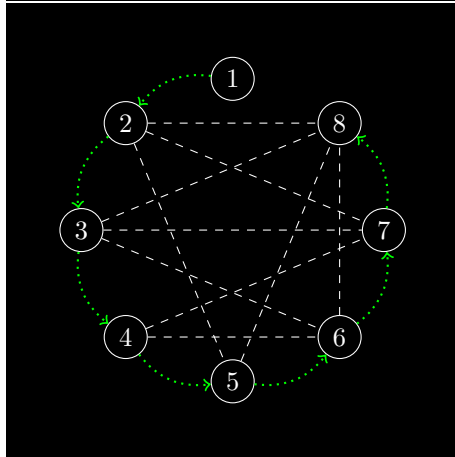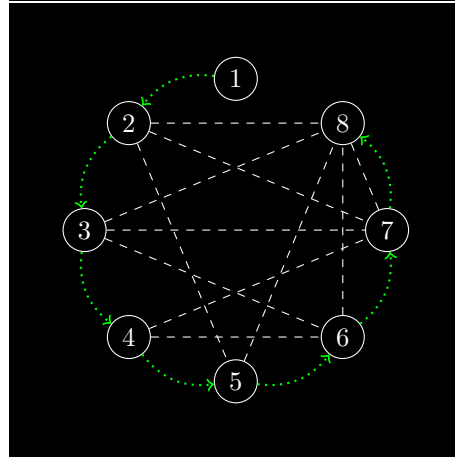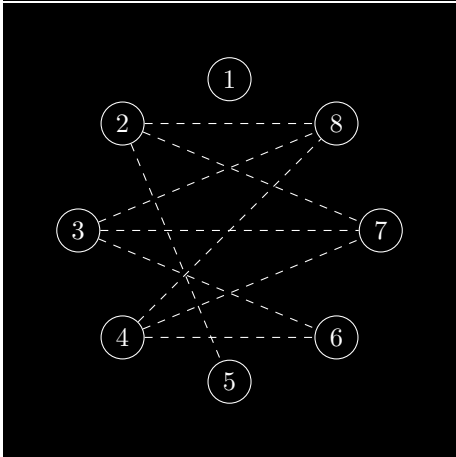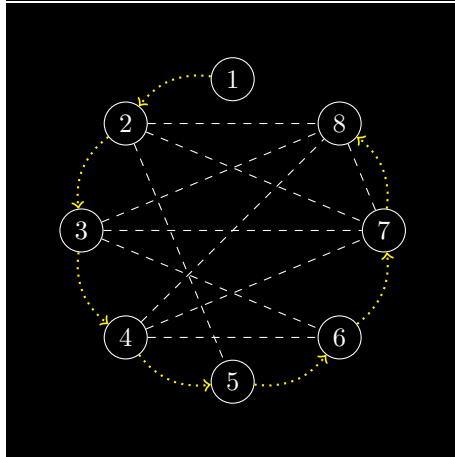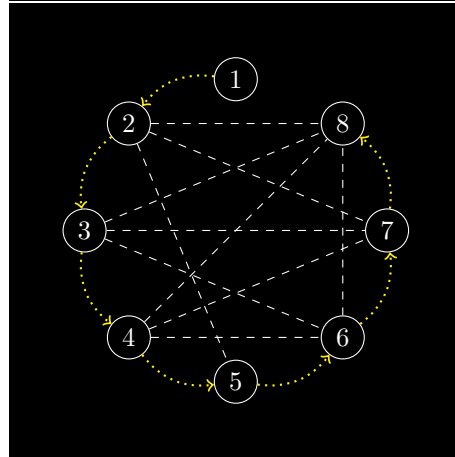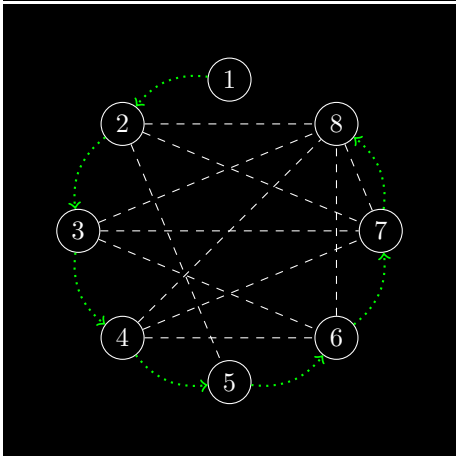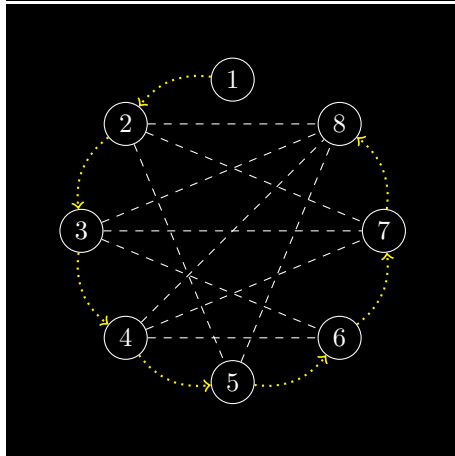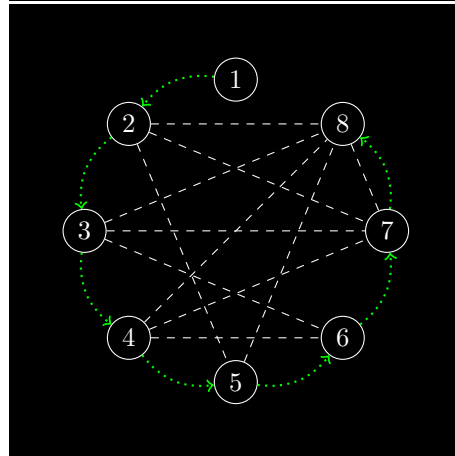

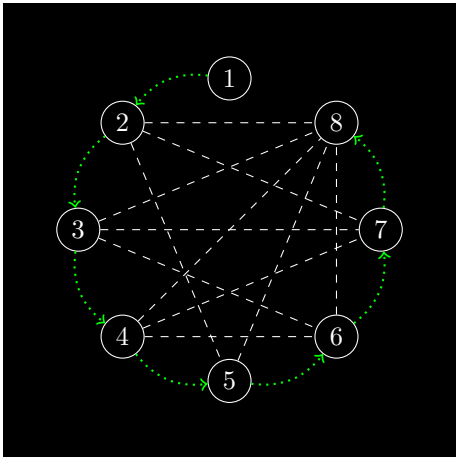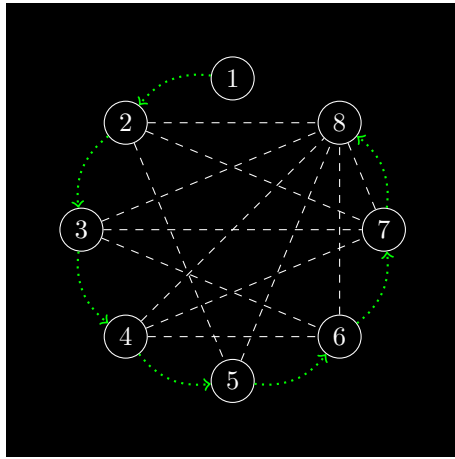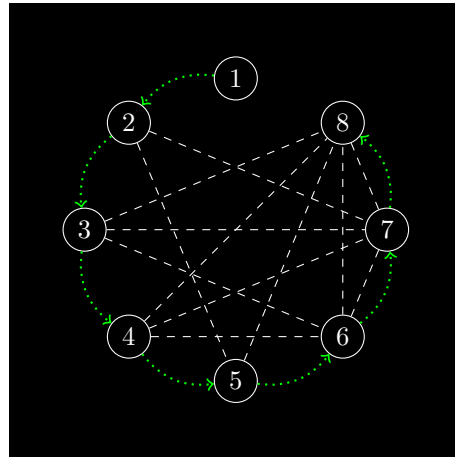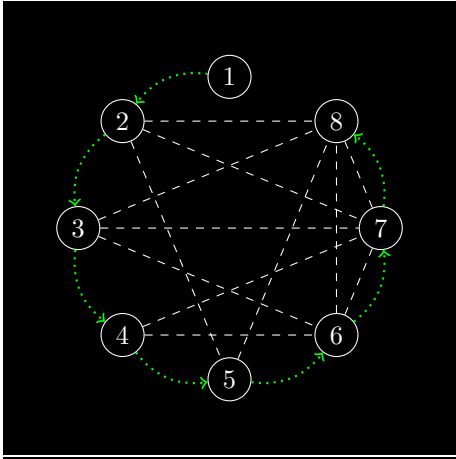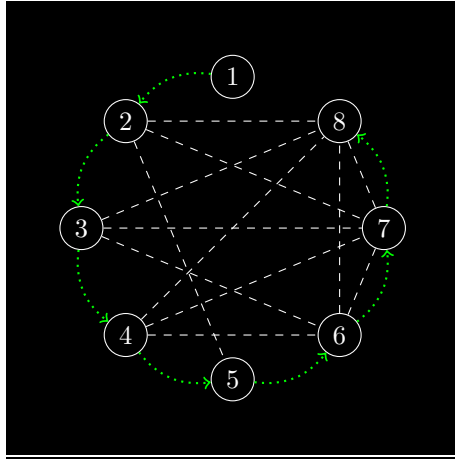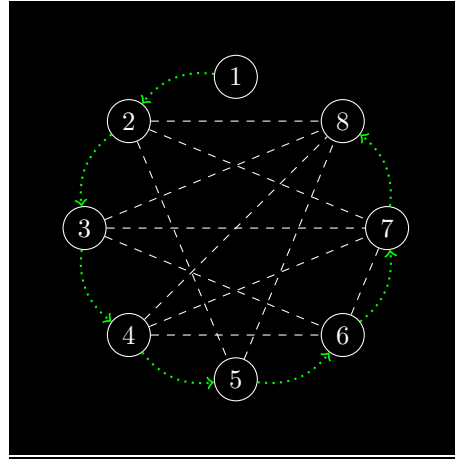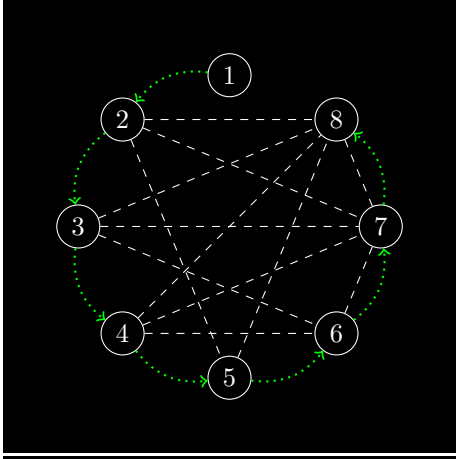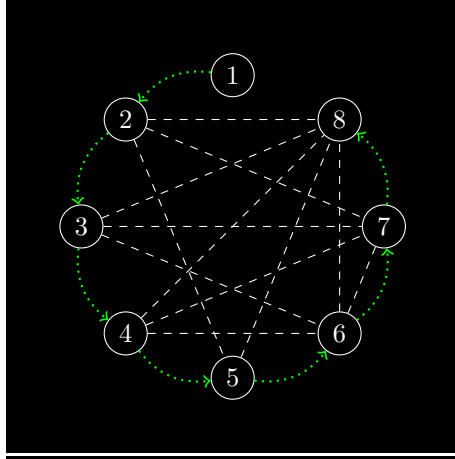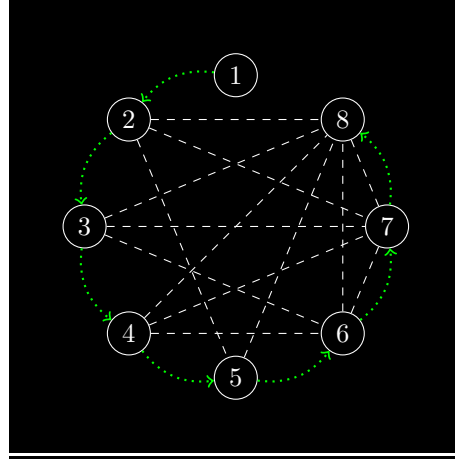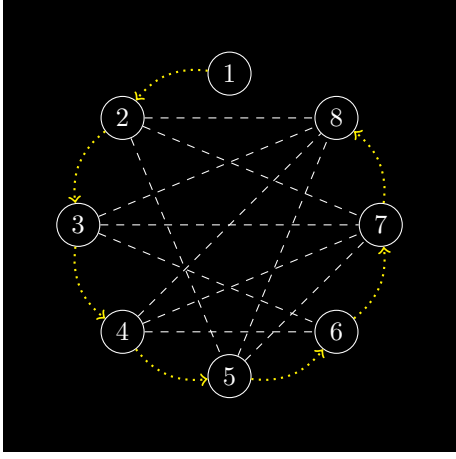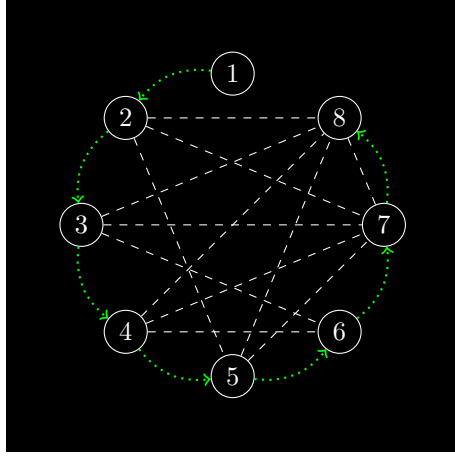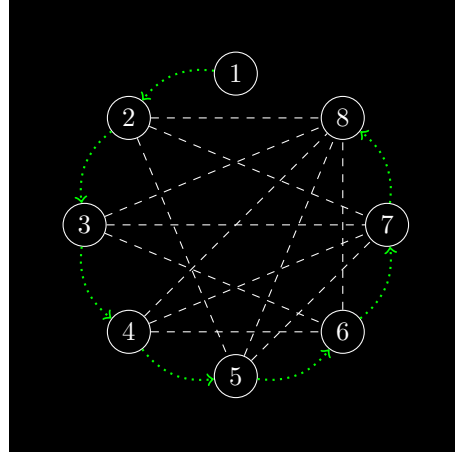

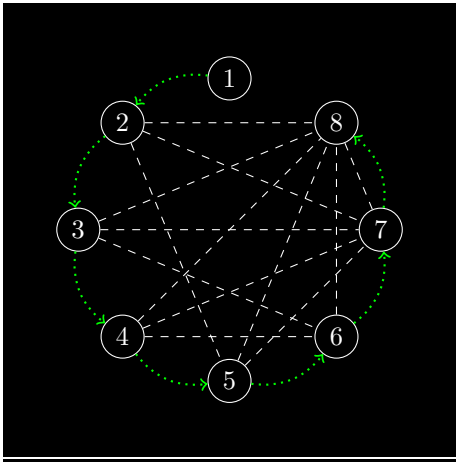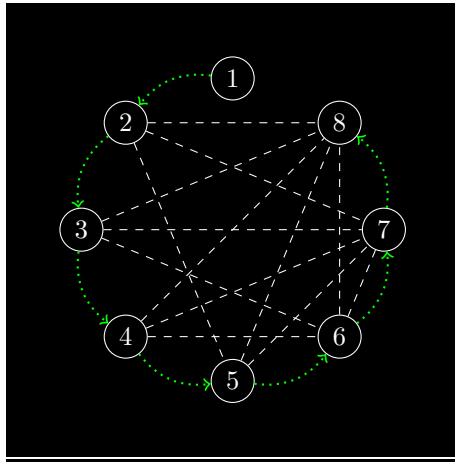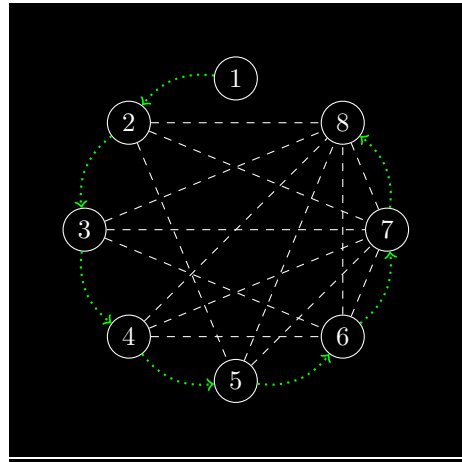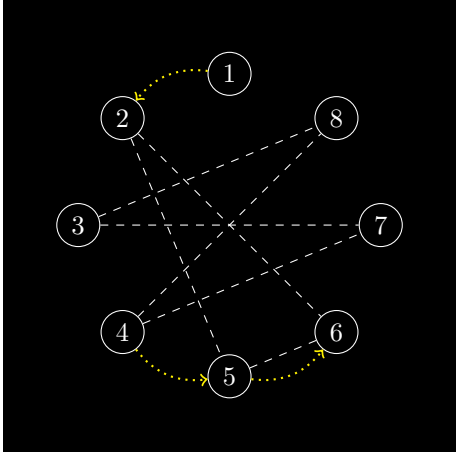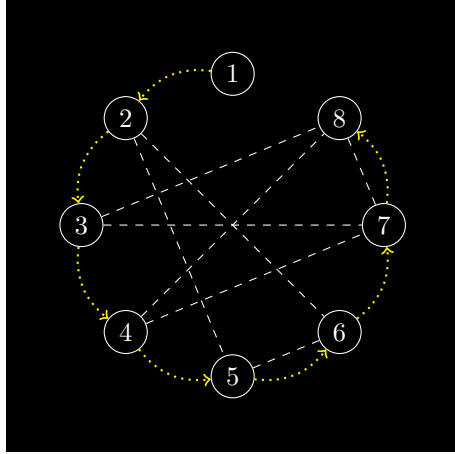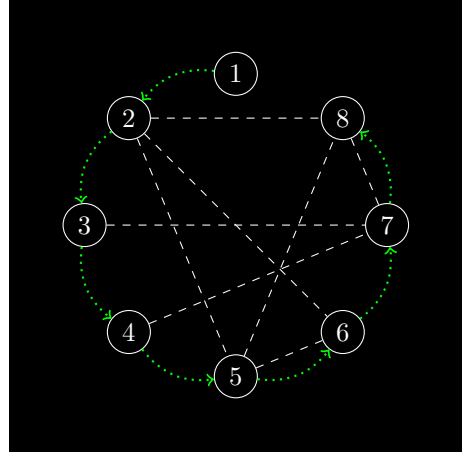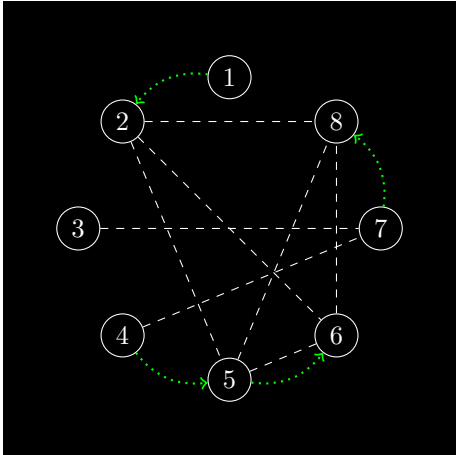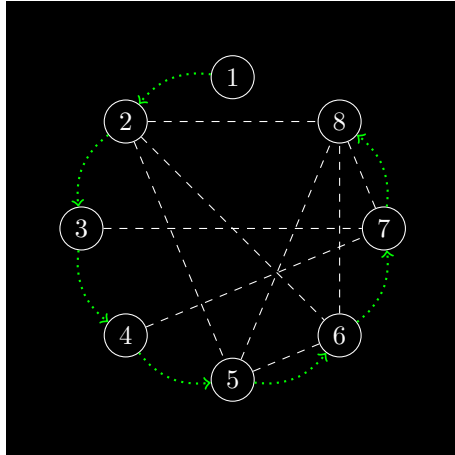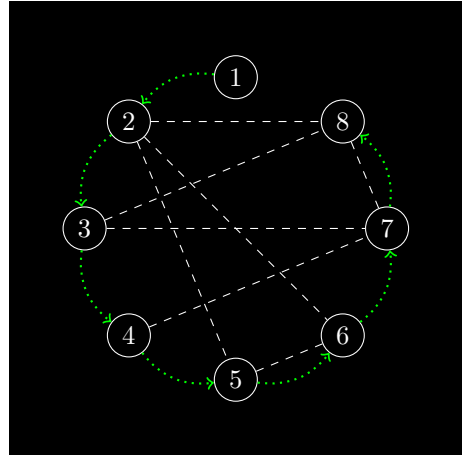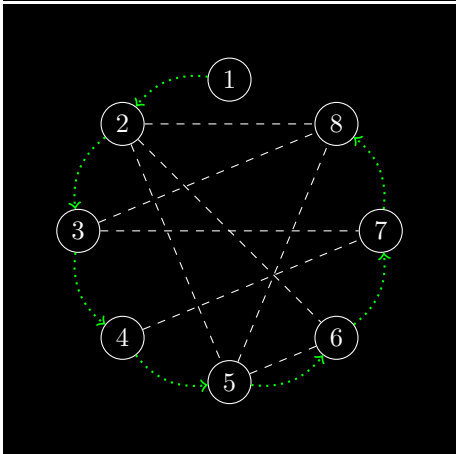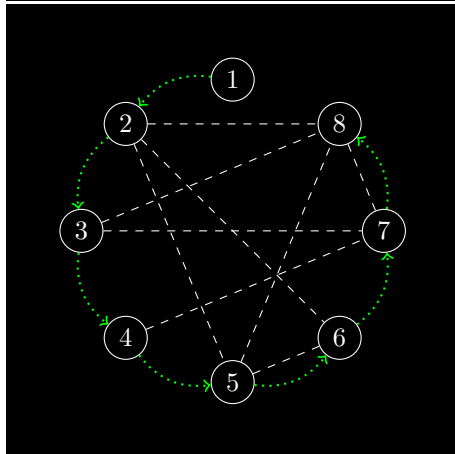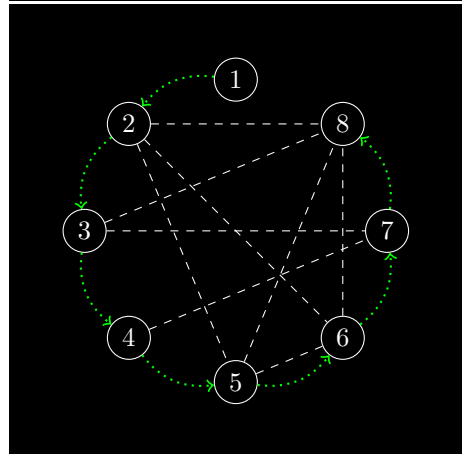

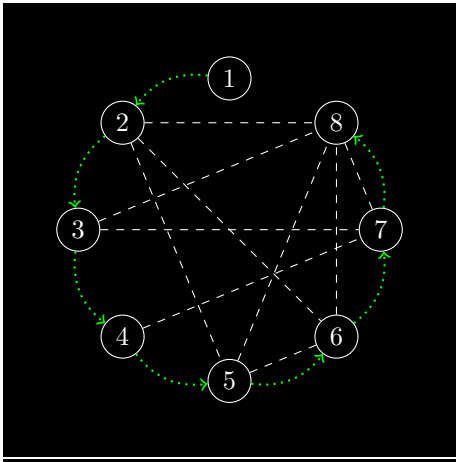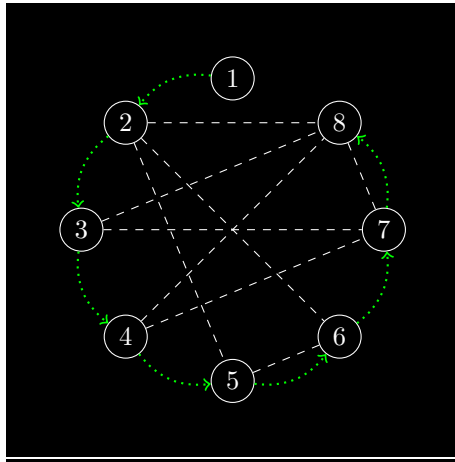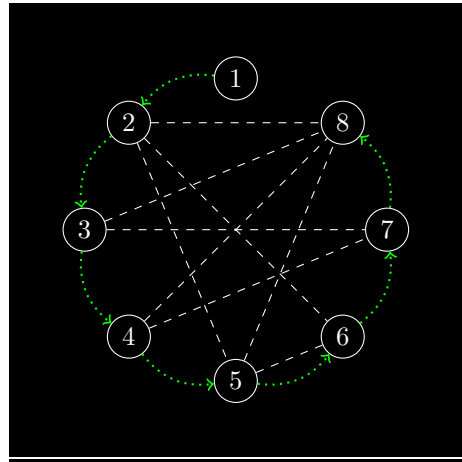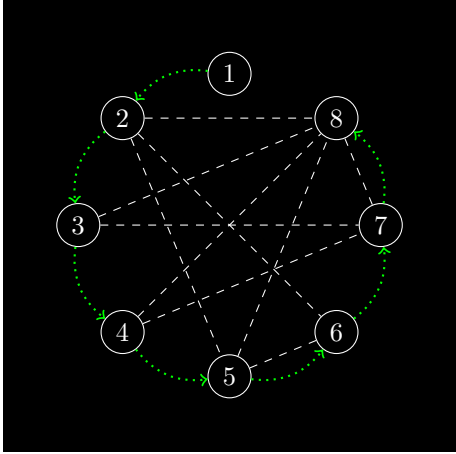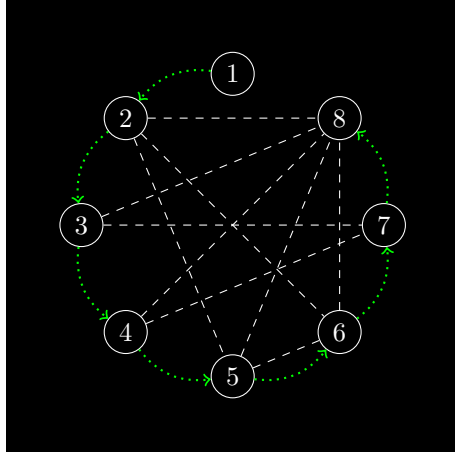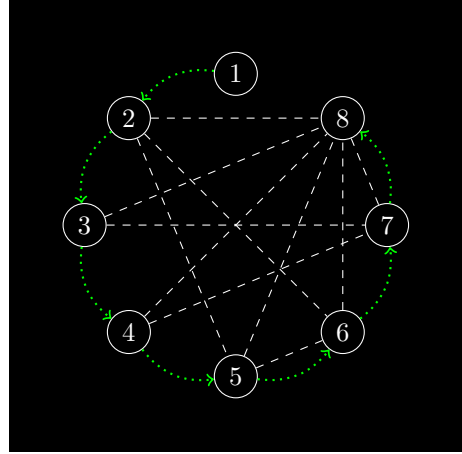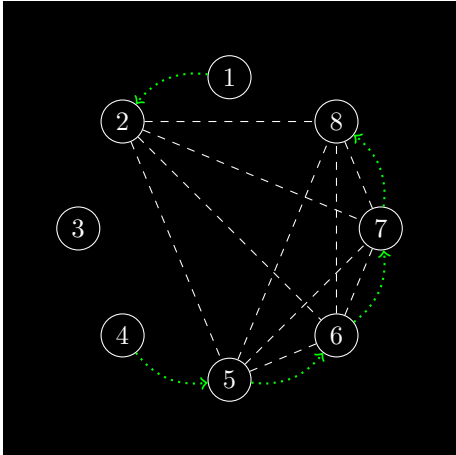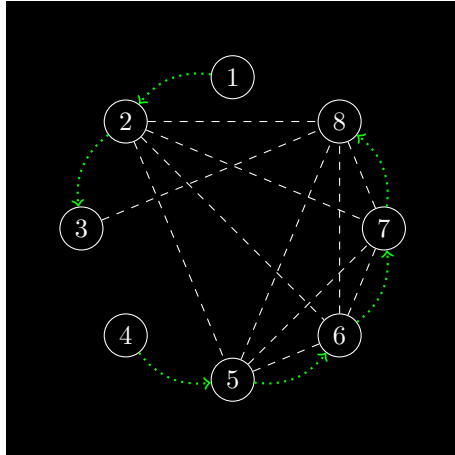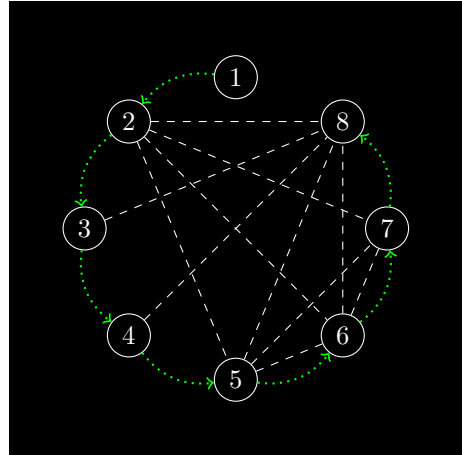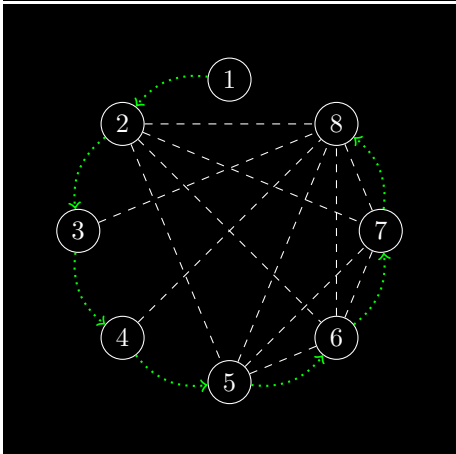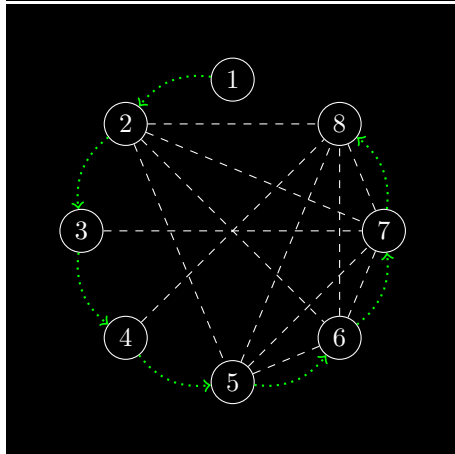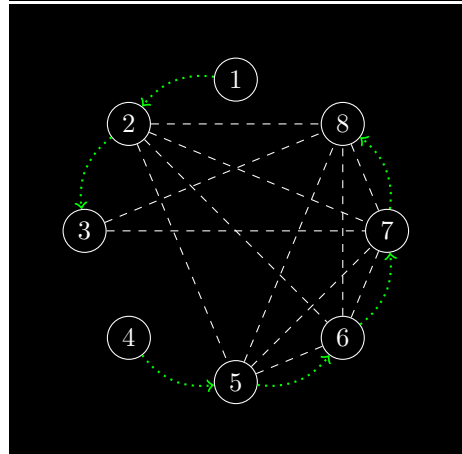



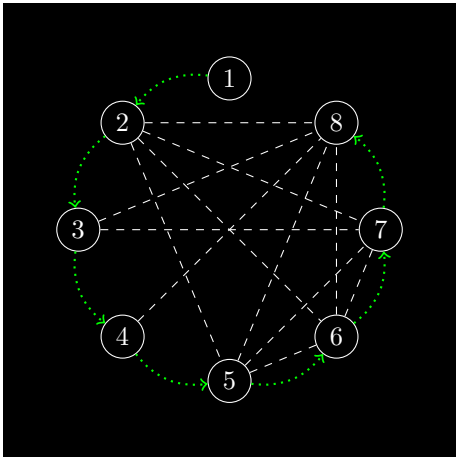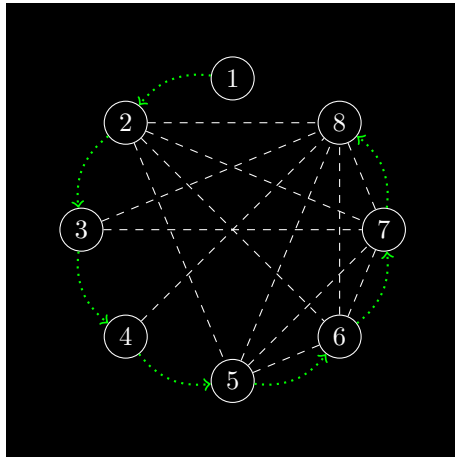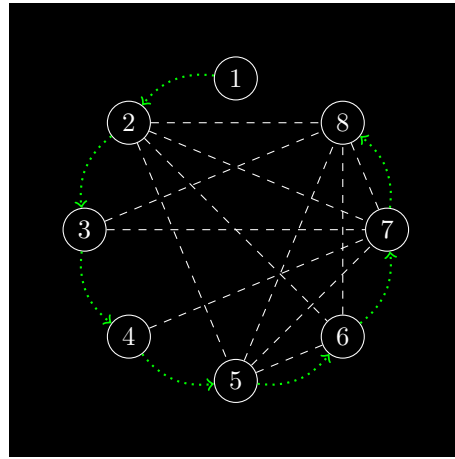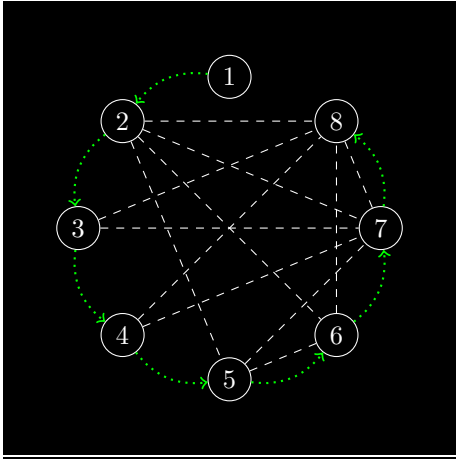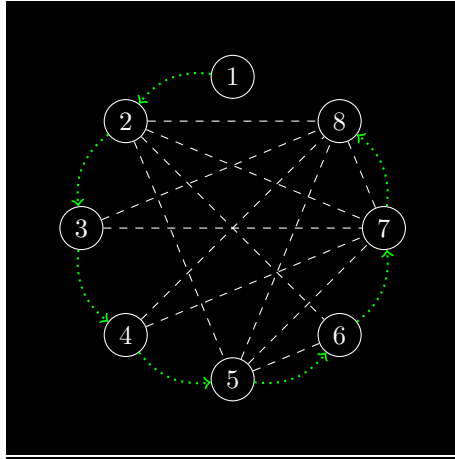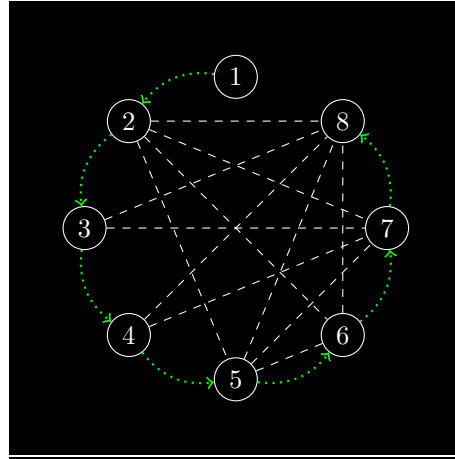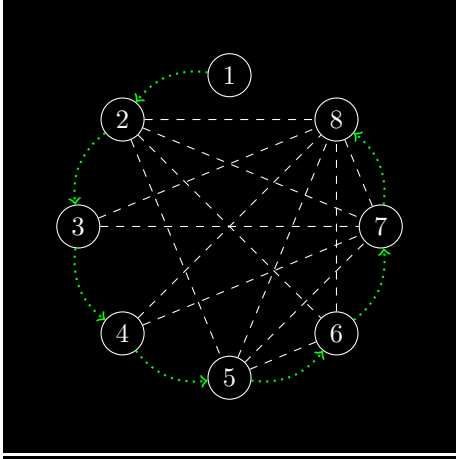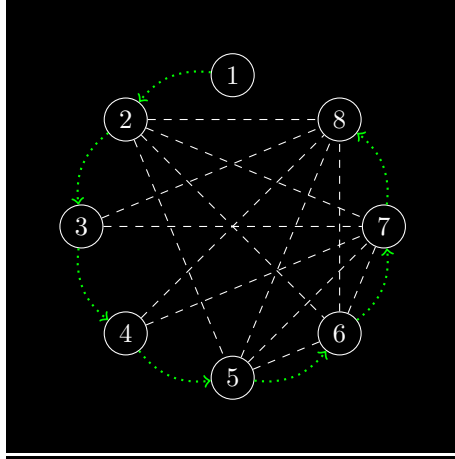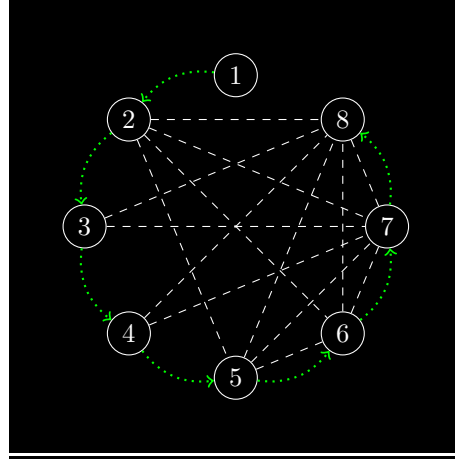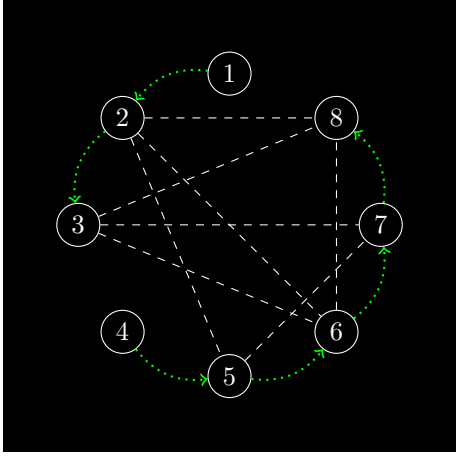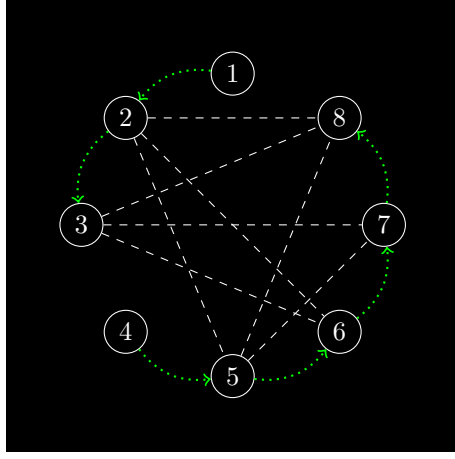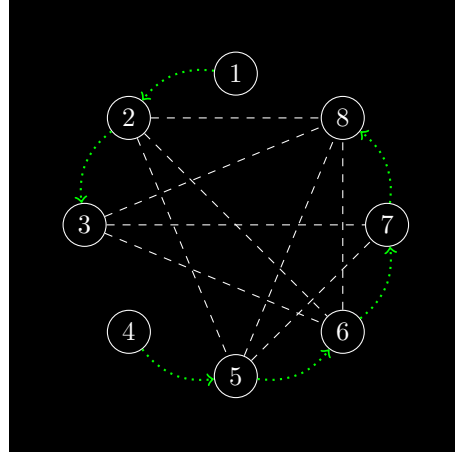

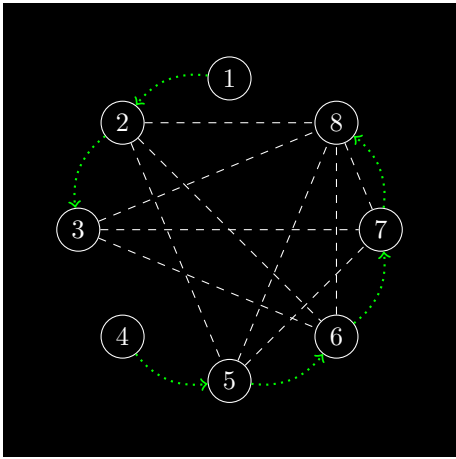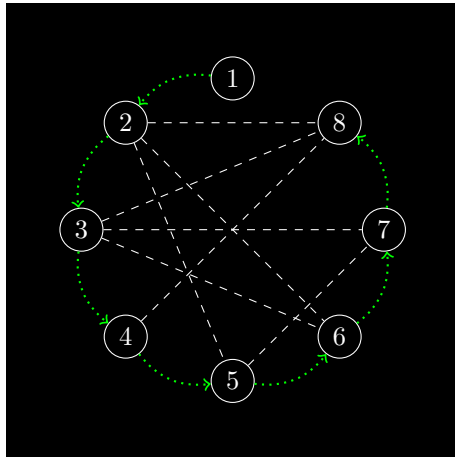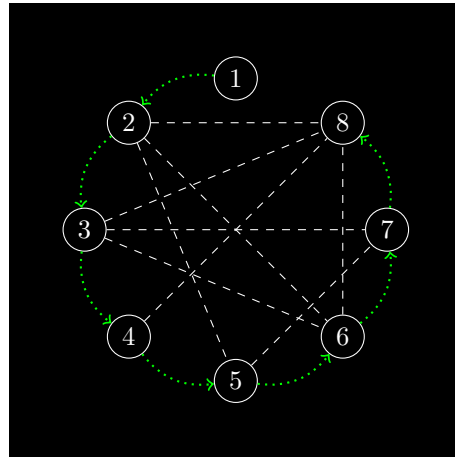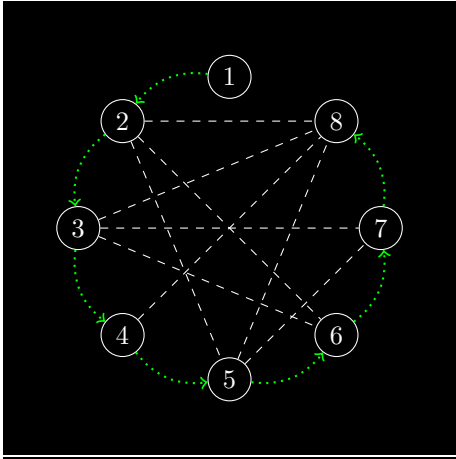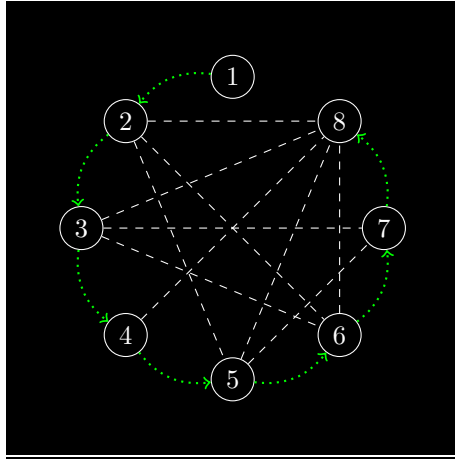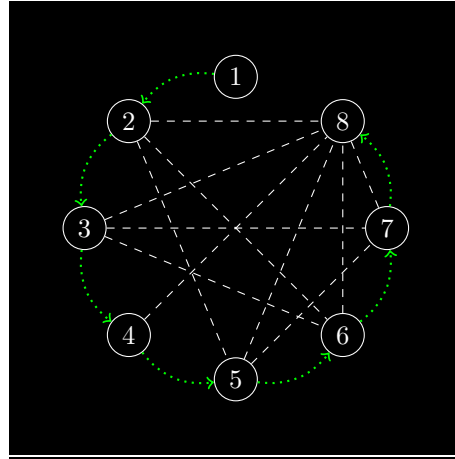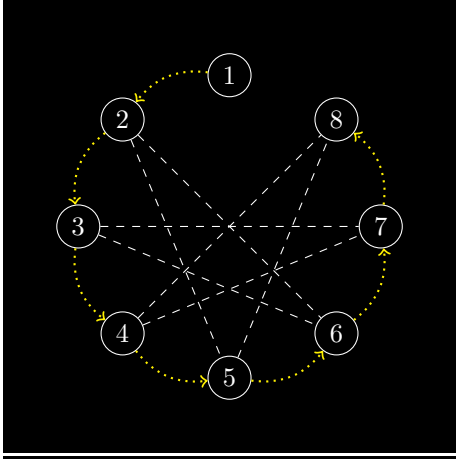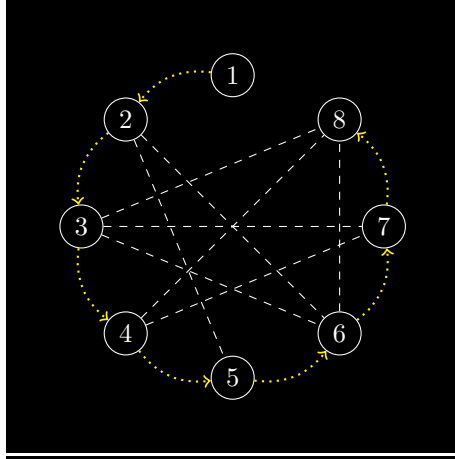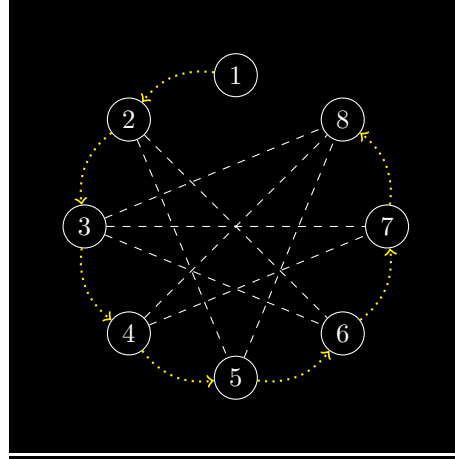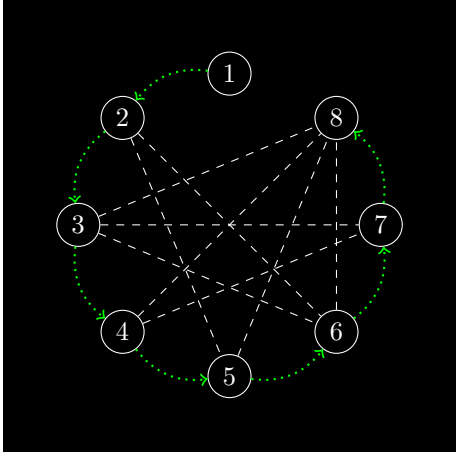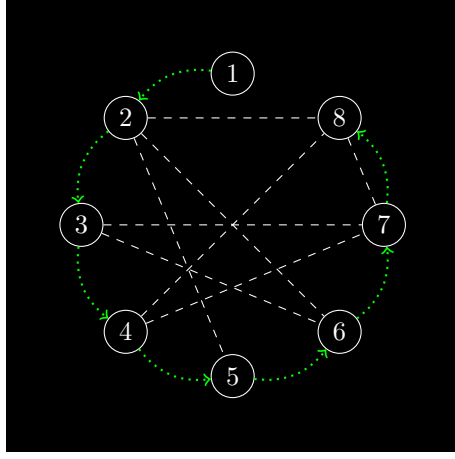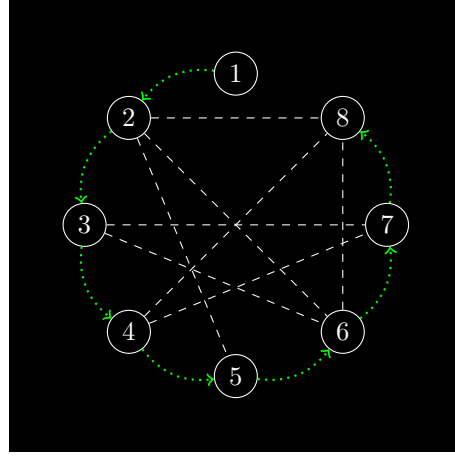

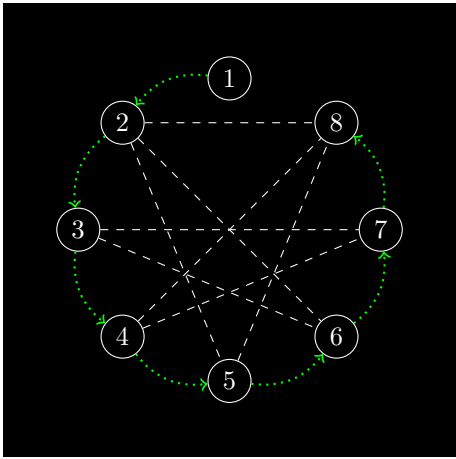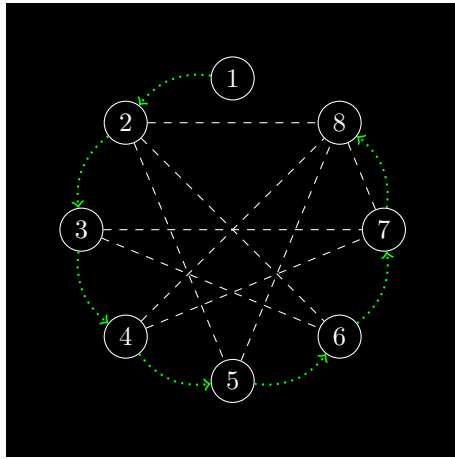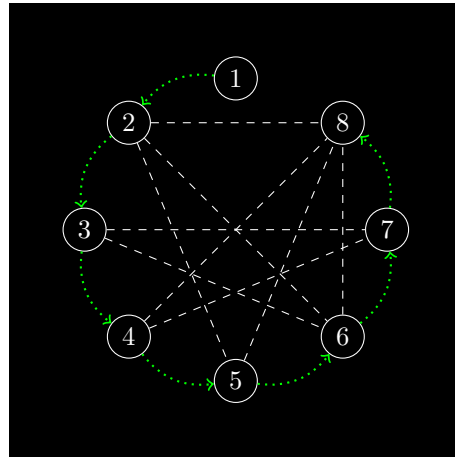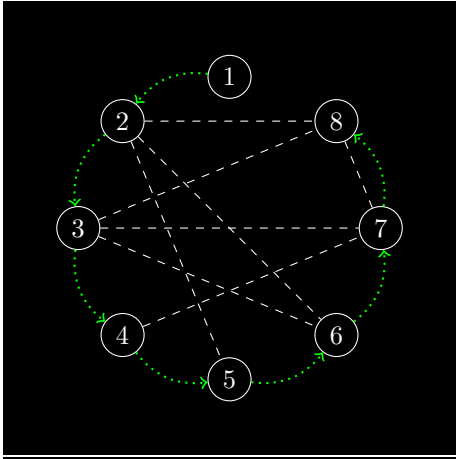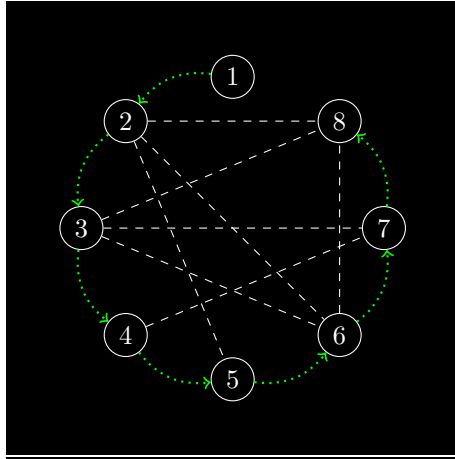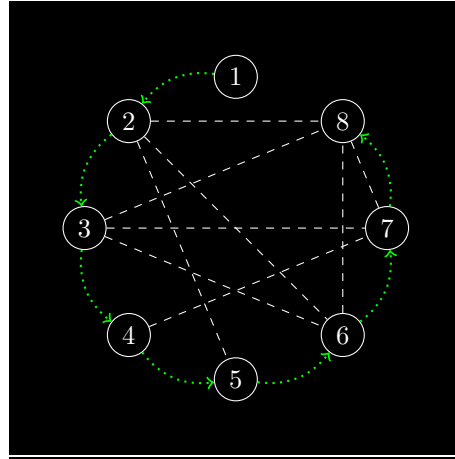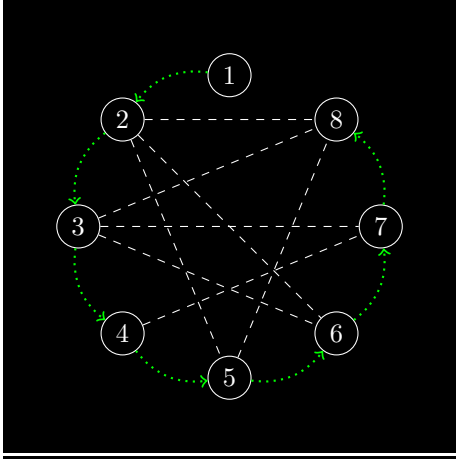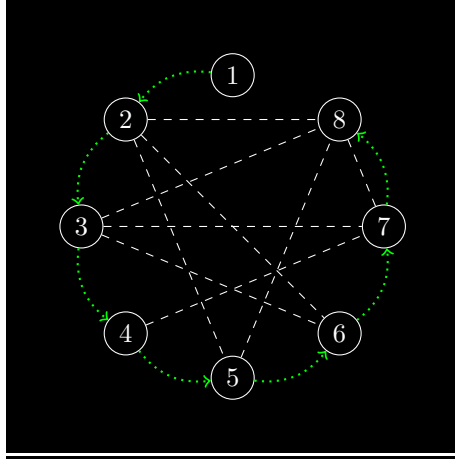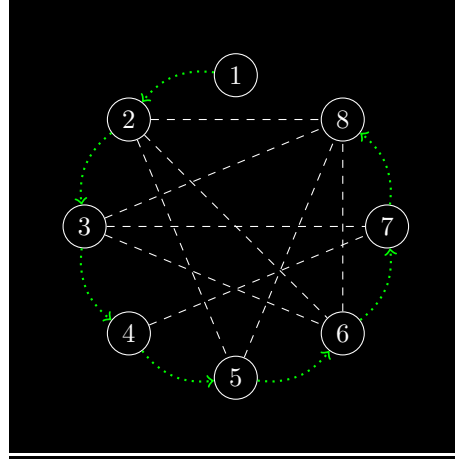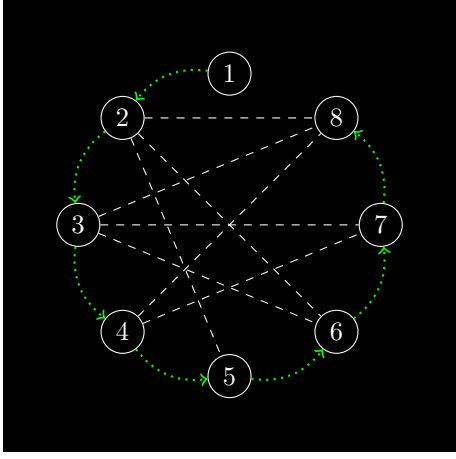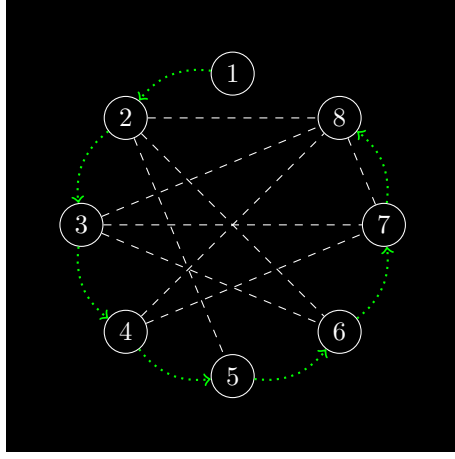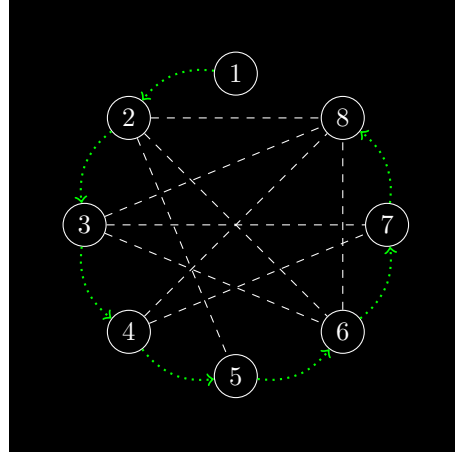

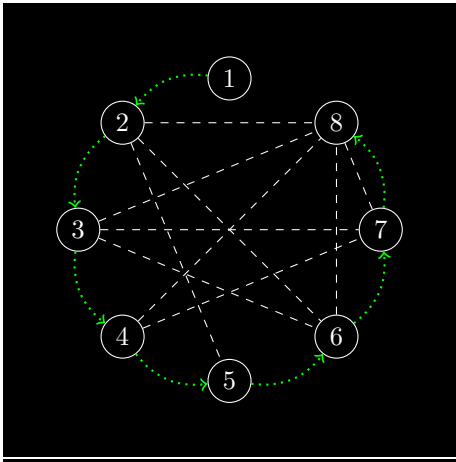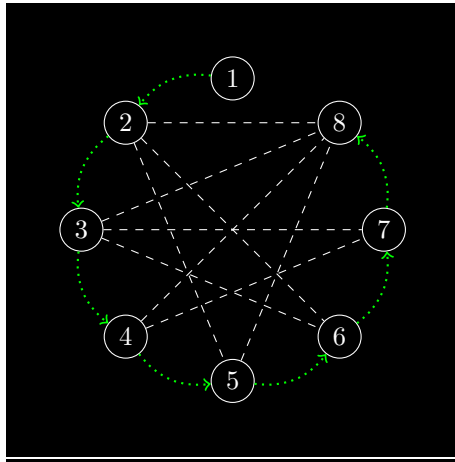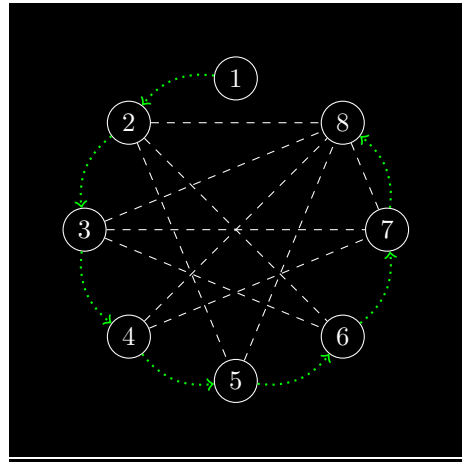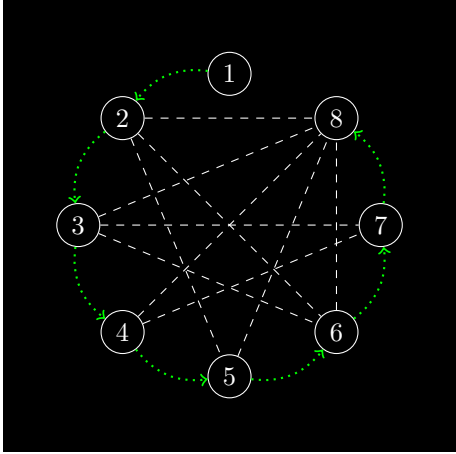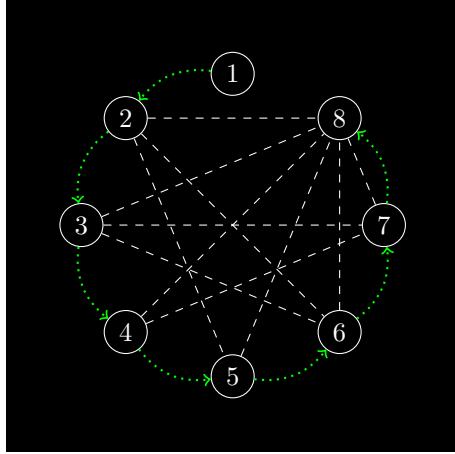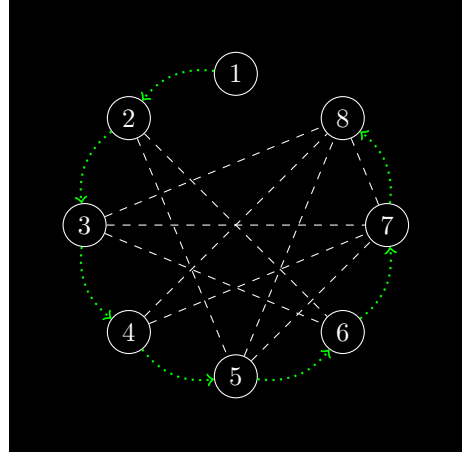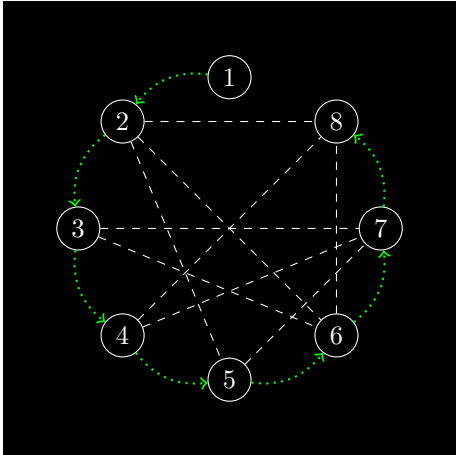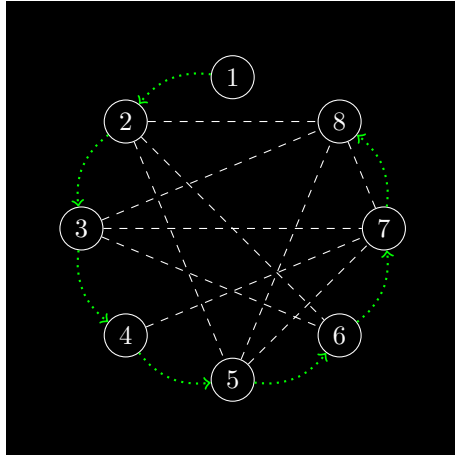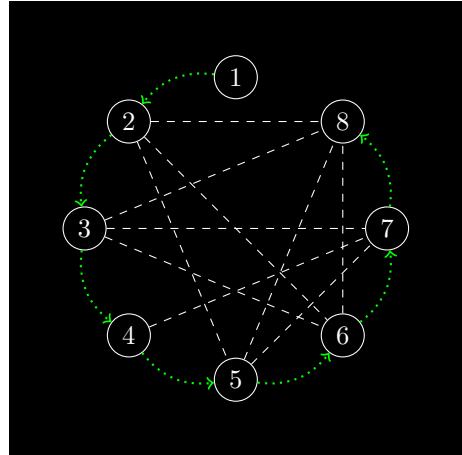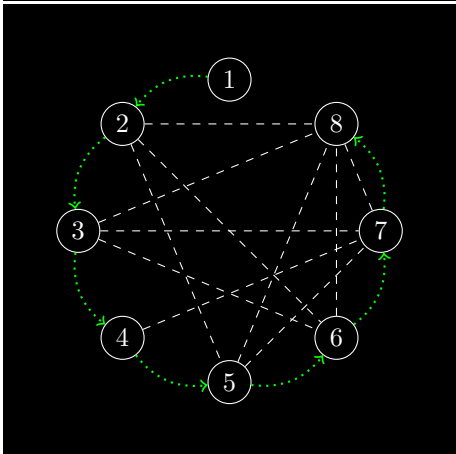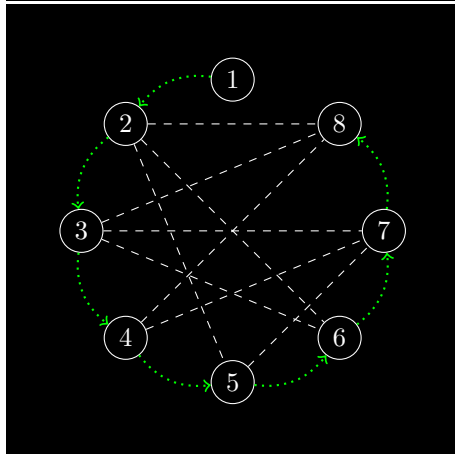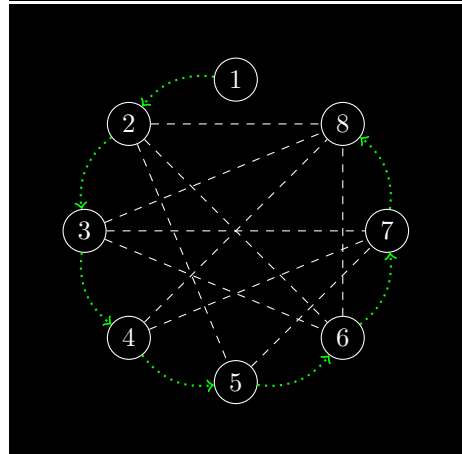

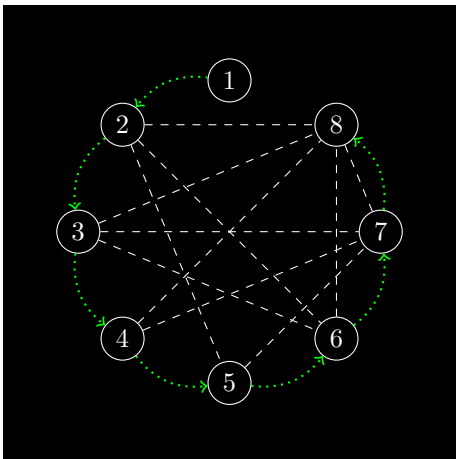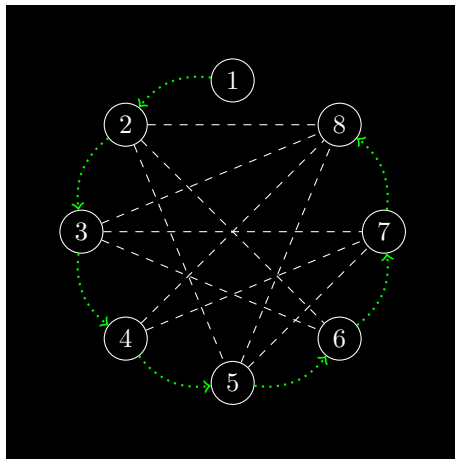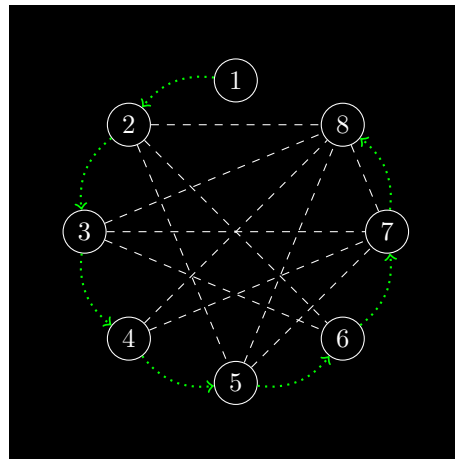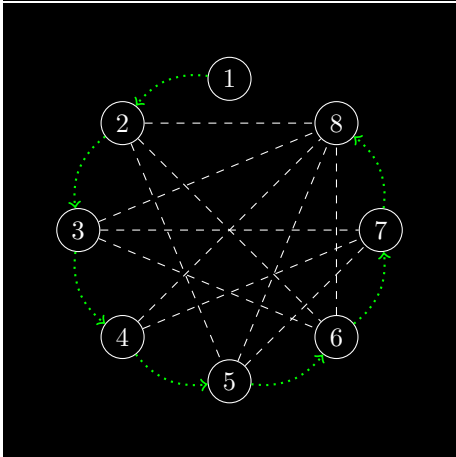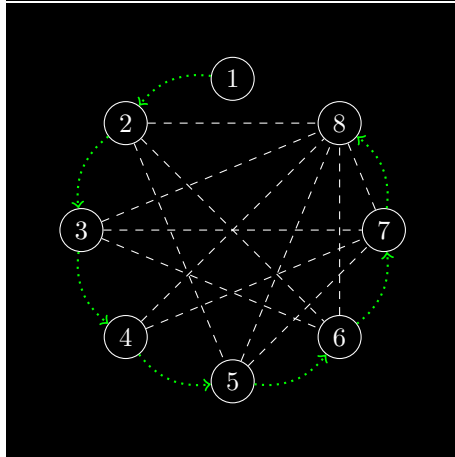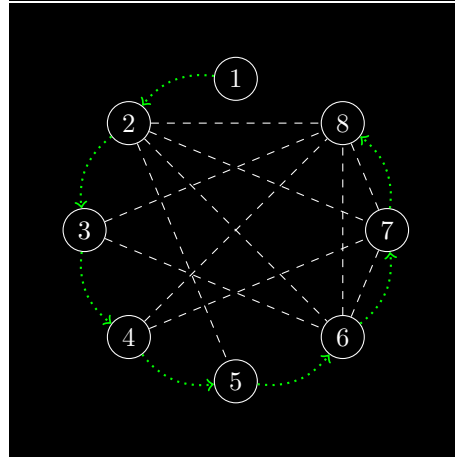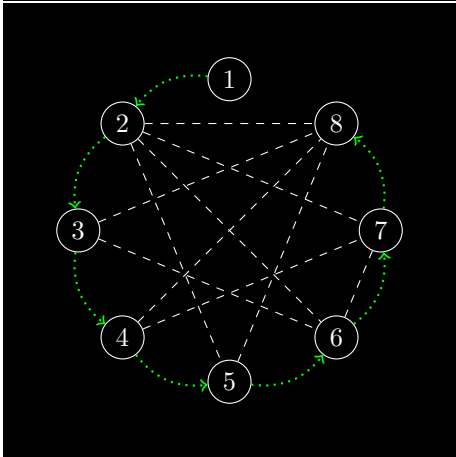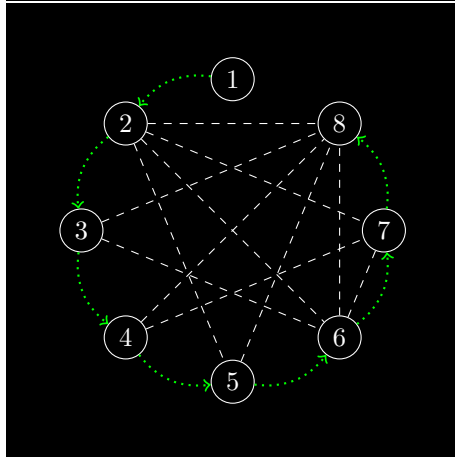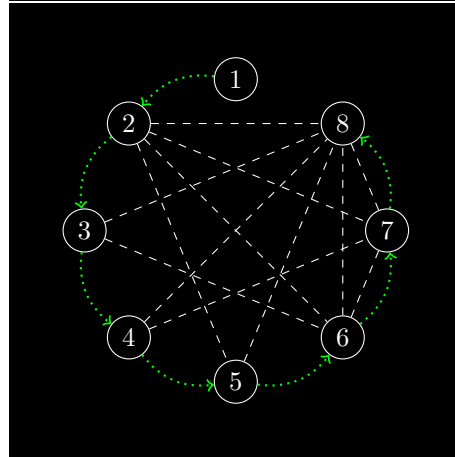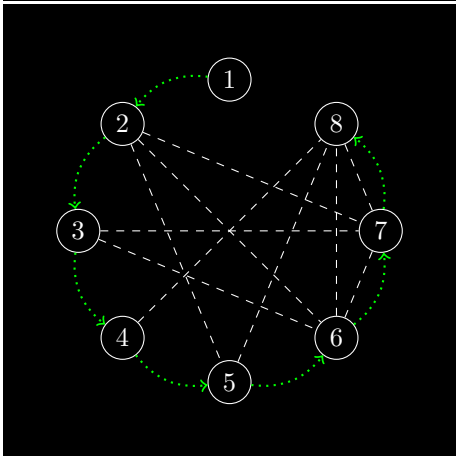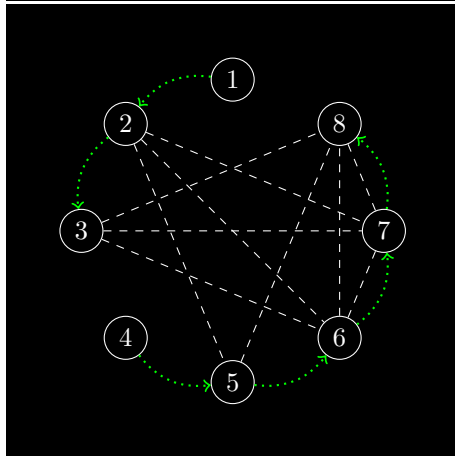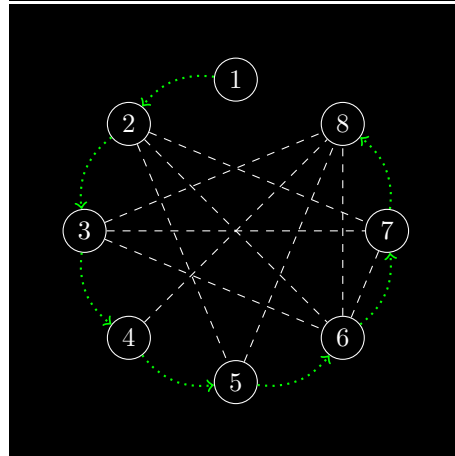

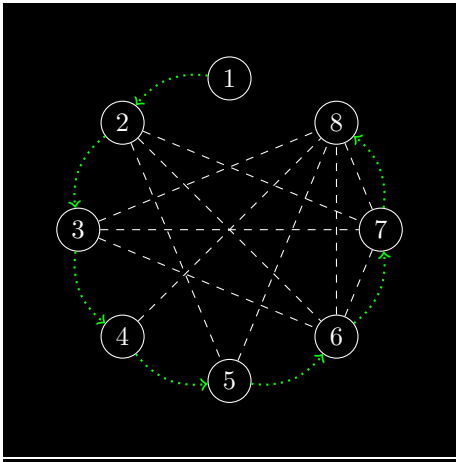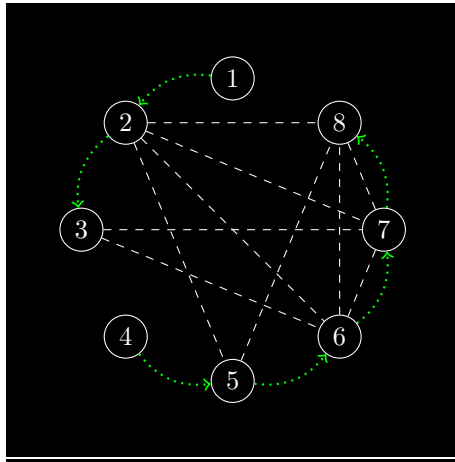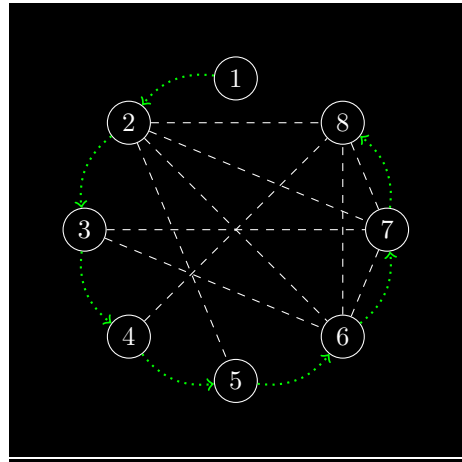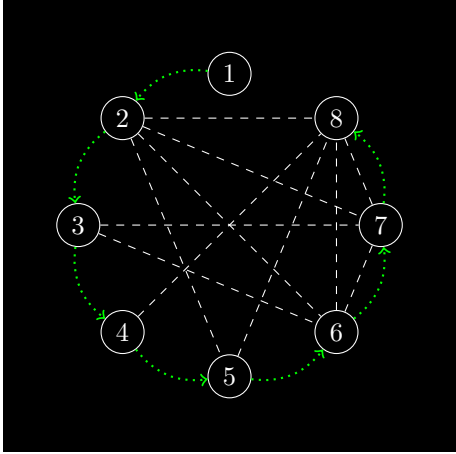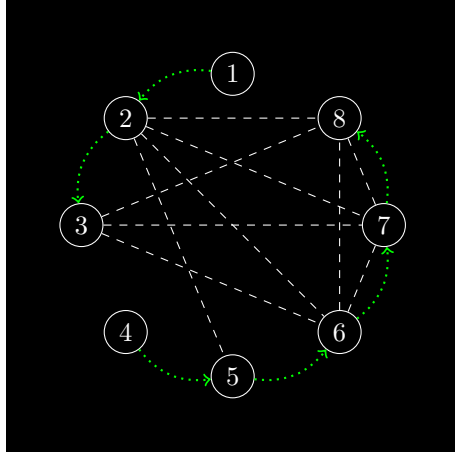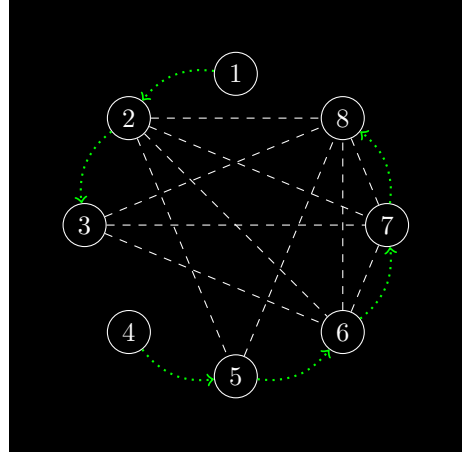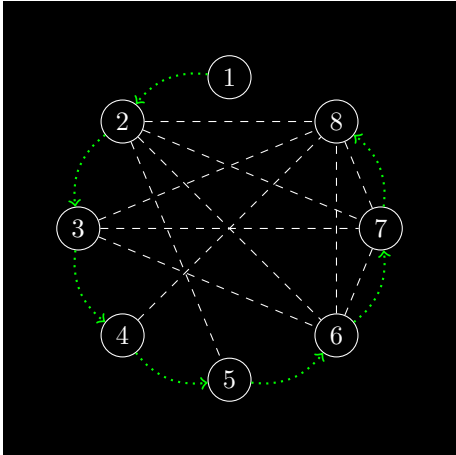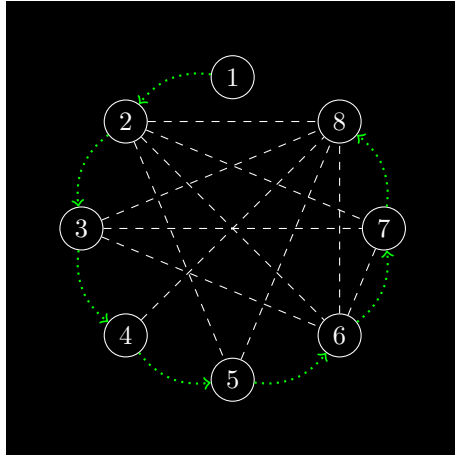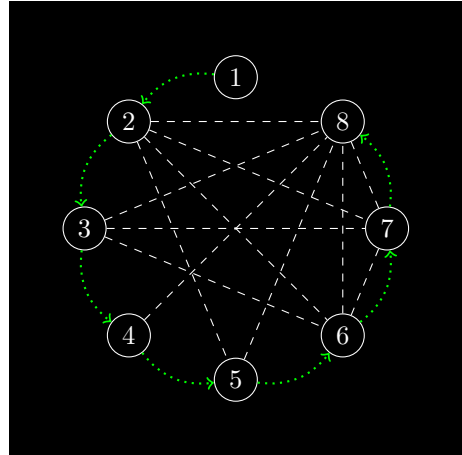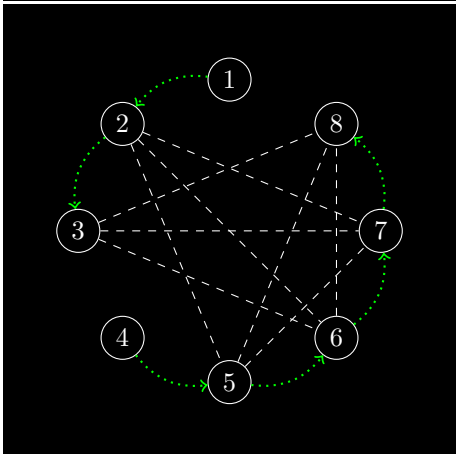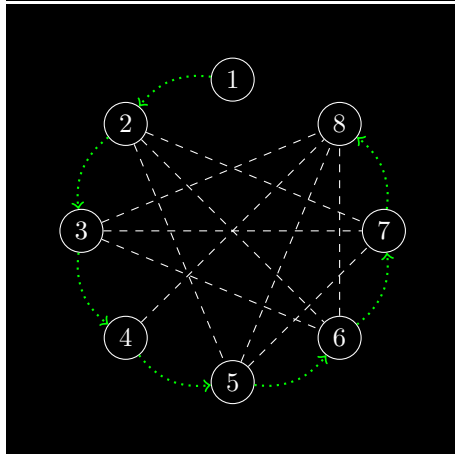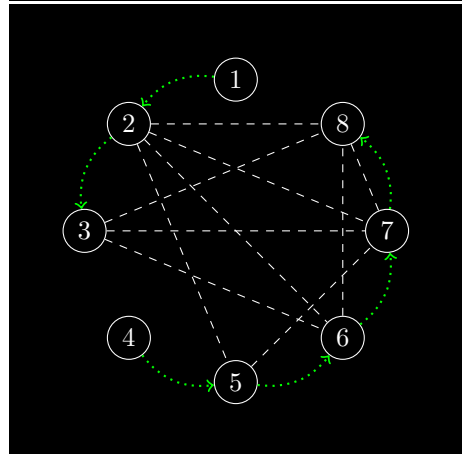



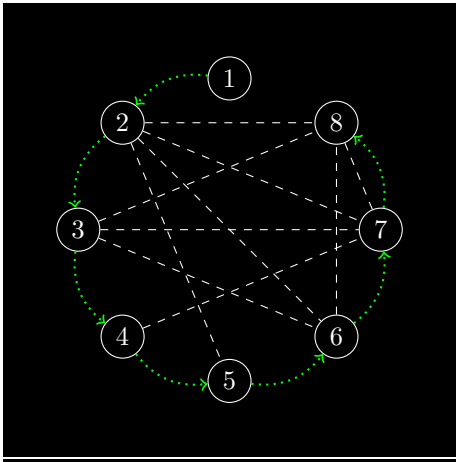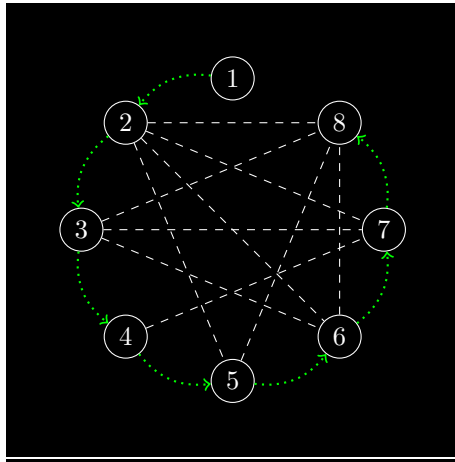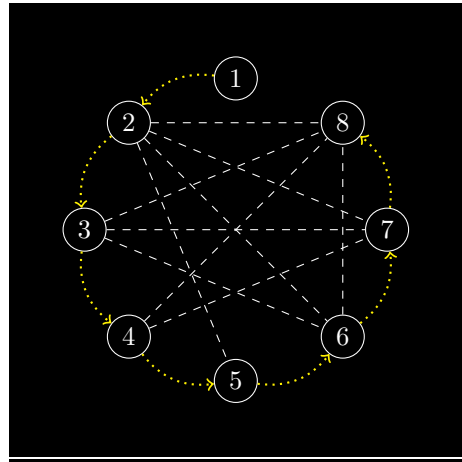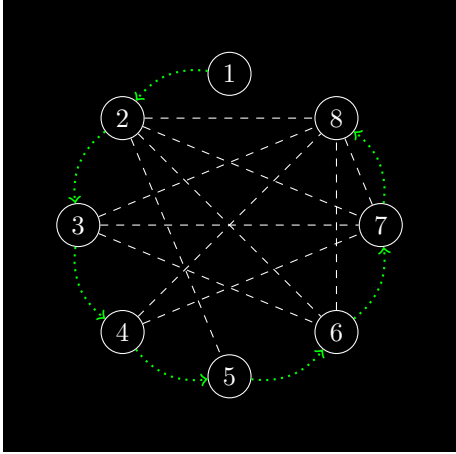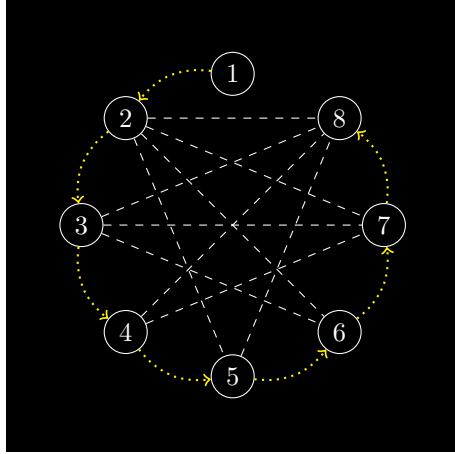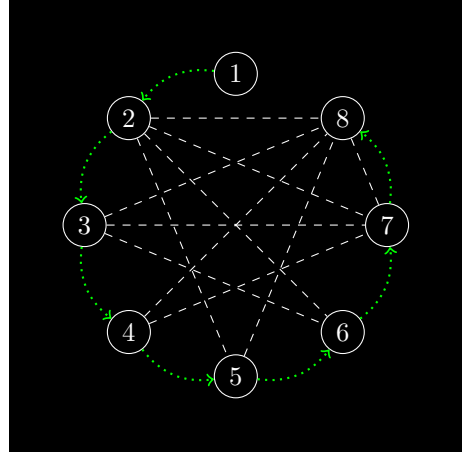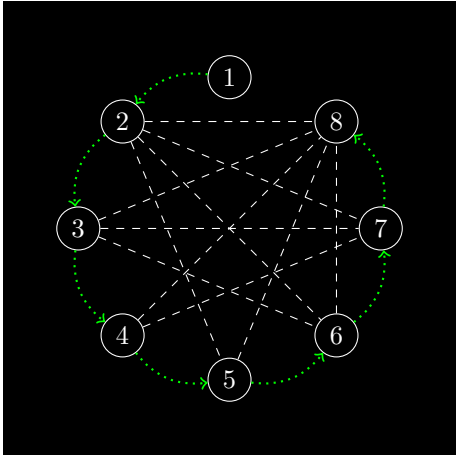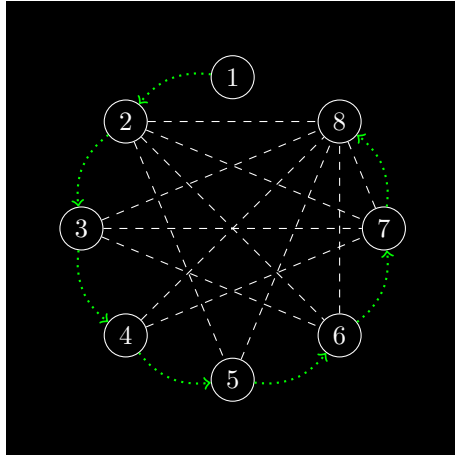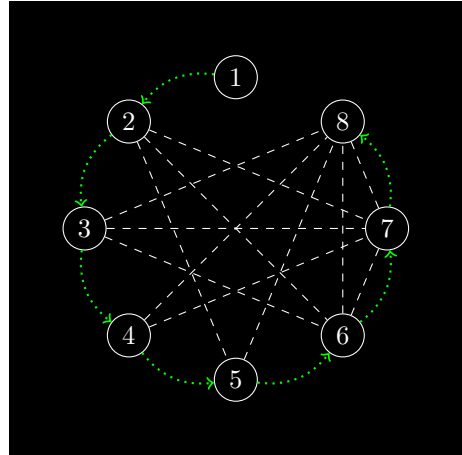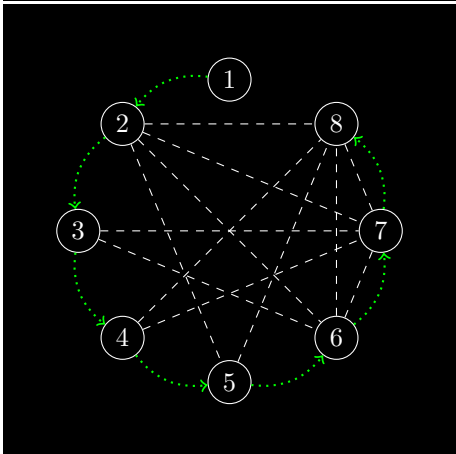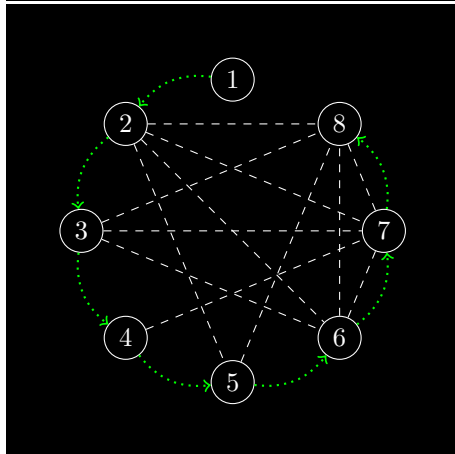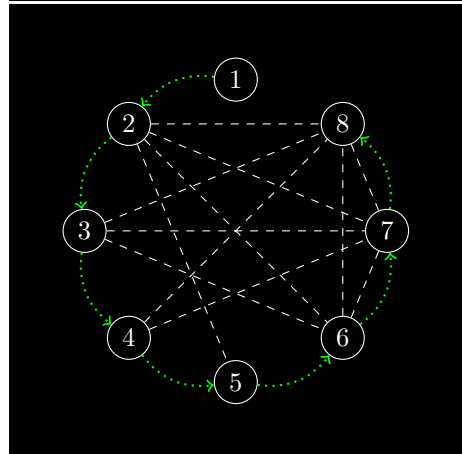





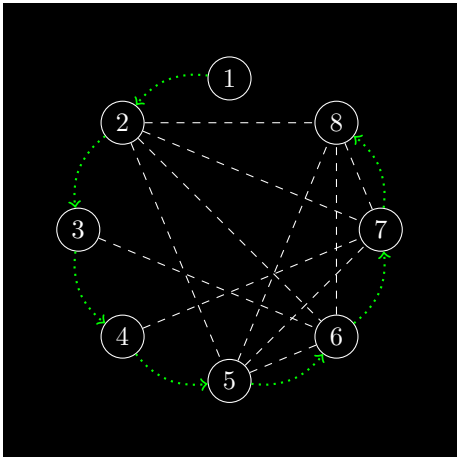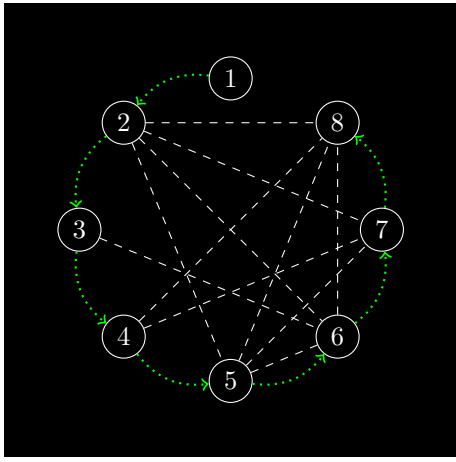

Supplement: Supplementary file 1 [file van-der-zander22a-supp.zip]
